# Supplementary material for: Are patients with a nasally placed feeding tube at risk of potential drug-drug interactions? A multicentre cross-sectional study
Source: PLoS One. 2019 Jul 31;14(7):e0220248. doi: 10.1371/journal.pone.0220248 (PMC6668811; doi:10.1371/journal.pone.0220248)
Supplement: S2 Table — Data on medications prescribed to patients with NPFT on admission and discharge. (XLSX) [file pone.0220248.s002.xlsx]

## Sheet: Admission
Patient	Hospital:	Type Prescription	High-alert Med	Med 1	Med 2	Med 3	Med 4	Med 5	Med 6	Med 7	Med 8	Med 9	Med 10	Med 11	Med 12	Med 13	Med 14	Med 15	Med 16	Med 17	Med 18	Med 19	Med 20	Med 21	Med 22	Med 23	Med 24	Med 25	N° Med Prescribed
1	HCA	handwritten	0	omeprazole	meropenem	simvastatin	metoclopramide	ondansetron	captopril	folic acid	vitamin B complex																		8
2	HCA	handwritten	1	meropenem	omeprazole	vancomycin	metoclopramide	dipyrone	Insulin human regular	captopril	vitamin B complex																		8
3	HCA	handwritten	0	amoxicillin + clavulanate	omeprazole	dexamethasone	ondansetron	dipyrone																					5
4	HCA	handwritten	0	omeprazole	amitriptyline	lithium carbonate	dipyrone	metoclopramide	captopril																				6
5	HCA	handwritten	3	cefazolin	omeprazole	dipyrone	metoclopramide	tramadol	enoxaparin	Insulin human isophane (NPH)																			7
6	HCA	handwritten	2	piperacillin + tazobactam	enoxaparin	omeprazole	metoclopramide	dipyrone	Insulin human regular	captopril																			7
8	HCA	handwritten	0	omeprazole	carvedilol	simvastatin	captopril	dipyrone	metoclopramide	vitamin B complex	lactulose																		8
9	HCA	handwritten	4	omeprazole	dipyrone	metoclopramide	meropenem	enoxaparin	aspirin	tramadol	Insulin human isophane (NPH)	Insulin human regular	gabapentin																10
10	HCA	handwritten	2	omeprazole	ceftriaxone	metronidazole	tramadol	enoxaparin																					5
14	HCA	handwritten	2	omeprazole	losartan	atenolol	gabapentin	prednisone	furosemide	hydrochlorothiazide	enoxaparin	Insulin human isophane (NPH)	dipyrone	metoclopramide															11
15	HCA	handwritten	1	omeprazole	dipyrone	metoclopramide	vancomycin	Insulin human isophane (NPH)																					5
16	HCA	handwritten	1	hydrocortisone	omeprazole	metoclopramide	acetylcysteine	amiodarone	simethicone	iron	Insulin human isophane (NPH)																		8
17	HCA	handwritten	2	aztreonam	amiodarone	metronidazole	clonazepam	fluoxetine	dipyrone	metoclopramide	tramadol	Insulin human regular	captopril																10
18	HCA	handwritten	0	omeprazole	dipyrone	metoclopramide	vitamin B complex	captopril																					5
20	HCA	handwritten	3	omeprazole	dipyrone	tenoxicam	amitriptyline	paracetamol	domperidone	simethicone	losartan	clonidine	tramadol	enoxaparin	Insulin human isophane (NPH)														12
21	HCA	handwritten	1	omeprazole	aztreonam	fluconazole	metoclopramide	dimethicone	enoxaparin																				6
23	HCA	handwritten	1	oxacillin	furosemide	levothyroxine	lactulose	spironolactone	hydrochlorothiazide	clonazepam	tramadol																		8
24	HCA	handwritten	1	cephalothin	omeprazole	dipyrone	tramadol	metoclopramide																					5
25	HCA	handwritten	2	omeprazole	bisacodyl	vancomycin	dipyrone	tramadol	furosemide	human albumin	Insulin human isophane (NPH)	captopril																	9
29	HCA	handwritten	0	omeprazole	dipyrone	aspirin	losartan																						4
30	HCA	handwritten	1	omeprazole	losartan	dipyrone	metoclopramide	tramadol	captopril																				6
33	HCA	handwritten	1	omeprazole	dipyrone	dimenhydrinate	dexamethasone	tramadol																					5
34	HCA	handwritten	1	omeprazole	morphine	metoclopramide	dipyrone																						4
35	HCA	handwritten	0	omeprazole	fluconazole	ceftriaxone	clindamycin	atenolol	sertraline	clonazepam	aspirin	amlodipine	folic acid																10
38	HCA	handwritten	0	imipenem	vancomycin	prednisone		risperidone	ondansetron	enalapril																			6
41	HCA	handwritten	1	omeprazole	dipyrone	levofloxacin	metoclopramide	tramadol	captopril																				6
43	HCA	handwritten	1	omeprazole	ceftriaxone	metronidazole	tramadol	metoclopramide	dipyrone	ondansetron																			7
44	HCA	handwritten	0	ceftriaxone	clindamycin	ranitidine	dipyrone	metoclopramide	clonazepam	domperidone																			7
46	HCA	handwritten	1	omeprazole	dipyrone	cephalothin	tramadol	metoclopramide																					5
47	HCA	handwritten	1	omeprazole	metoclopramide	ondansetron	tramadol																						4
48	HCA	handwritten	2	omeprazole	dipyrone	tramadol	enoxaparin	spironolactone	paroxetine	vitamin K																			7
49	HCA	handwritten	2	cefazolin	omeprazole	dipyrone	metoclopramide	tramadol	Insulin human isophane (NPH)																				6
50	HCA	handwritten	1	cefazolin	phenytoin	omeprazole	dipyrone	metoclopramide	tramadol																				6
51	HCA	handwritten	0	cefazolin	dipyrone	tenoxicam	metoclopramide																						4
52	HCA	handwritten	0	omeprazole	prednisone	losartan	atenolol	calcium + vitamin D	dipyrone	metoclopramide																			7
53	HCA	handwritten	1	omeprazole	morphine	metoclopramide	dipyrone	hydrocortisone	piperacillin + tazobactam																				6
55	HCA	handwritten	0	omeprazole	ciprofloxacin	ceftriaxone	dipyrone	metoclopramide	furosemide	enalapril																			7
56	HCA	handwritten	1	omeprazole	piperacillin + tazobactam	morphine	dipyrone	metoclopramide																					5
57	HCA	handwritten	1	omeprazole	ceftriaxone	dipyrone	tramadol	metoclopramide																					5
58	HCA	handwritten	0	omeprazole	ciprofloxacin	ceftriaxone	dipyrone	metoclopramide	captopril																				6
59	HCA	handwritten	2	omeprazole	cefazolin	dipyrone	metoclopramide	tramadol	enoxaparin																				6
60	HCA	handwritten	1	dipyrone	tramadol	metoclopramide																							3
62	HCA	handwritten	0	omeprazole	dipyrone	vitamin B complex	metoclopramide	captopril																					5
63	HCA	handwritten	1	cephalothin	tramadol	omeprazole	dipyrone	metoclopramide																					5
65	HCA	handwritten	0	omeprazole	levofloxacin	dipyrone	metoclopramide	acetylcysteine																					5
67	HGF	handwritten	4	vancomycin	meropenem	gentamicin	midazolam	fentanyl	phenytoin	domperidone	folic acid	baclofen	lactulose	vitamin B complex		Insulin human isophane (NPH)	Insulin human regular	bisacodyl											14
68	HGF	handwritten	3	captopril	dipyrone	hypertonic glucose 50%	Insulin human regular	heparin	bromopride	ranitidine																			7
69	HGF	handwritten	3	dipyrone	fondaparinux	metoclopramide	omeprazole	simethicone	Insulin human regular	hypertonic glucose 50%																			7
70	HGF	handwritten	5	atenolol	bromopride	atorvastatin	clopidogrel	dipyrone	furosemide	hypertonic glucose 50%	Insulin human isophane (NPH)	Insulin human regular	potassium chloride EV	heparin	ranitidine														12
71	HGF	handwritten	2	aspirin	amiodarone	bromopride	clarithromycin	dipyrone	hypertonic glucose 50%	heparin	ranitidine	ampicillin + sulbactam																	9
72	HGF	handwritten	2	aspirin	candesartan		dipyrone	fondaparinux	hypertonic glucose 50%	hydrochlorothiazide	lactulose	losartan	metoclopramide	ranitidine	simvastatin	piperacillin + tazobactam	ampicillin + sulbactam												13
73	HGF	handwritten	6	bromopride	dipyrone	midazolam	fentanyl	hypertonic glucose 50%	immune globulin	Insulin human regular	ivermectin	heparin	norepinephrine	ranitidine															11
74	HGF	handwritten	2	aspirin	ranitidine	bromopride	clonidine	dipyrone	hypertonic glucose 50%	meropenem	simvastatin	teicoplanin	tramadol																10
75	HGF	handwritten	1	valproic acid	ampicillin	bromopride	captopril	ceftriaxone	clonazepam	dipyrone	heparin	omeprazole																	9
76	HGF	handwritten	1	aspirin	folinic acid	amlodipine	atenolol	bisacodyl	ceftriaxone	cyanocobalamin	clonidine	vitamin B complex	dipyrone	hypertonic glucose 50%	haloperidol		hydralazine	losartan	minoxidil	Isosorbide	omeprazole	metoclopramide	promethazine	simvastatin	vancomycin				21
77	HGF	handwritten	2	aspirin	candesartan	baclofen	bromopride	clopidogrel	dipyrone	glucose 5%	Insulin human regular	levamlodipine	simvastatin	tramadol	trimetazidina														12
78	HGF	handwritten	3	hypertonic glucose 50%	isotonic physiological solution	amikacin	polymyxin B	vancomycin	bromopride		diazepam	dipyrone	heparin	Insulin human regular	methylprednisolone	nifedipine	ondansetron	paracetamol	ranitidine	calcium polystyrenesulfonate	calcium gluconate								17
79	HGF	handwritten	6	potassium chloride EV	Ringer's lactate solution	allopurinol	sulfamethoxazole + trimethoprim	bromopride	captopril	dipyrone	midazolam	etomidate	fentanyl	furosemide	morphine	omeprazole	paracetamol	dexchlorpheniramine	polymyxin B	succinylcholine	teicoplanin	voriconazole	magnesium sulfate						20
80	HCFMRP-USP	electronic	1	sulfamethoxazole + trimethoprim	bromopride	omeprazole	propranolol	enoxaparin	dipyrone	ondansetron	glucose 5%		human albumin	lactulose															10
81	HCFMRP-USP	electronic	1	dexamethasone	lamotrigine	valproic acid	clonazepam	phenobarbital	baclofen	calcium carbonate	colecalciferol	lactulose	enoxaparin	dipyrone	bromopride	ranitidine													13
82	HCFMRP-USP	electronic	1	dipyrone	bromopride	lactulose	omeprazole		human albumin	salbutamol	ipratropium	Insulin human regular																	8
83	HCFMRP-USP	electronic	1	cefepime	vancomycin	clopidogrel	aspirin	amiodarone	fenoterol	omeprazole	dipyrone	tramadol	bromopride	quetiapine	ipratropium	lactulose	finasteride												14
84	HCFMRP-USP	electronic	5	dipyrone	bromopride	tramadol	glucose 5%	Insulin human regular	cefepime	omeprazole			fentanyl	lactulose	furosemide		midazolam				morphine		isosorbid						13
85	HCFMRP-USP	electronic	1	lamotrigine	phenytoin	clobazam	enoxaparin	dipyrone	bromopride	sulfamethoxazole + trimethoprim																			7
86	HCFMRP-USP	electronic	1	clonidine	hydralazine	amlodipine	lactulose	simvastatin	heparin	ranitidine	human alphaepoetin	dipyrone	bromopride																10
87	HCFMRP-USP	electronic	3	levofloxacin		gentamicin		tramadol	pentoxifylline	thiamine	levothyroxine	omeprazole	colecalciferol	calcium carbonate	prednisone	sertraline	folic acid	potassium chloride		cobalamin	enoxaparin			glucose 5%	dipyrone	bromopride	Insulin human regular	isotonic physiological solution	20
88	HCFMRP-USP	electronic	2	ranitidine	thiamine	dipyrone	bromopride	heparin	methadone	amiodarone	prednisone	isotonic physiological solution																	9
89	HCFMRP-USP	electronic	3	methylprednisolone	Insulin human isophane (NPH)	enoxaparin	omeprazole	risperidone	amiodarone	clopidogrel	atorvastatin	salbutamol	ipratropium						tramadol	dipyrone	paracetamol + codeine	bromopride	salbutamol	ipratropium	escitalopram				17
90	HCFMRP-USP	electronic	2	tramadol	scopolamine	bromopride	dipyrone	isotonic physiological solution	amlodipine	ranitidine	phenytoin	amitriptyline	enoxaparin																10
91	HCFMRP-USP	electronic	4	dipyrone	tramadol	bromopride	ondansetron	furosemide	piperacillin + tazobactam	heparin	Insulin human regular	poliestirenossulfaonto de cálcio	ipratropium		salbutamol		morphine												12
92	HCFMRP-USP	electronic	2	ranitidine	metoclopramide	lactulose			dipyrone	morphine	ondansetron	Insulin human regular	salbutamol	ipratropium	meropenem	vancomycin	paracetamol	glucose 5%	meropenem										14
93	HCFMRP-USP	electronic	1	isosorbid	valproic acid	simvastatin	amlodipine	diazepam		heparin		dipyrone	furosemide	isotonic physiological solution	lactulose	bromopride													11
94	HCFMRP-USP	electronic	1	dipyrone	ondansetron	dexamethasone	glucose 5%	lactulose	furosemide	morphine		haloperidol		cefepime	salbutamol	ipratropium													11
95	HCFMRP-USP	electronic	0	dipyrone	ondansetron																								2
96	HCFMRP-USP	electronic	1	ceftriaxone	metronidazole	omeprazole	bromopride	tramadol	losartan	amlodipine	furosemide	human alphaepoetin	dipyrone	ondansetron		sodium citrate	vancomycin												13
97	HCFMRP-USP	electronic	1	lamotrigine	losartan	bisoprolol	simvastatin	ranitidine	ipratropium	dipyrone	bromopride	enoxaparin																	9
98	HCFMRP-USP	electronic	2		levothyroxine	potassium chloride	dipyrone	ondansetron	glucose 5%	metoclopramide	Insulin human regular	heparin	ciprofloxacin	omeprazole	vitamin A	vitamin E													12
99	HCFMRP-USP	electronic	2	midazolam	pethidine																								2
100	HCFMRP-USP	electronic	0	dipyrone	bromopride																								2
101	HCFMRP-USP	electronic	2	omeprazole	dexamethasone	dipyrone	tramadol	ondansetron	bromopride	glucose 5%	Insulin human regular																		8
102	HCFMRP-USP	electronic	1	aspirin	clopidogrel		atenolol	losartan	amlodipine	hydrochlorothiazide	omeprazole	heparin		dipyrone	bromopride														10
103	HCFMRP-USP	electronic	1	dexamethasone	dipyrone	bromopride	amlodipine	calcium carbonate	levothyroxine	heparin																			7
104	HCFMRP-USP	electronic	1	vancomycin	amitriptyline	simethicone	mineral oil	magnesium hydroxide			dipyrone	bromopride	ranitidine		meropenem	enoxaparin	cefepime												11
105	HCFMRP-USP	electronic	1	ceftriaxone	clindamycin	dipyrone	bromopride	heparin	phenobarbital	enalapril	quetiapine	furosemide	baclofen	scopolamine															11
106	HCFMRP-USP	electronic	1	morphine	dipyrone	metoclopramide	omeprazole	ondansetron	lactulose																				6
107	HCFMRP-USP	electronic	2	dipyrone	ondansetron	norepinephrine	cefepime	vancomycin	midazolam	fentanyl	omeprazole	Insulin human regular		furosemide	potassium chloride	dobutamine													12
108	HCFMRP-USP	electronic	1	omeprazole	morphine		dipyrone	bromopride	ondansetron	amitriptyline	haloperidol	diazepam	chlorpromazine																9
109	HCFMRP-USP	electronic	4	Insulin human regular	glucose 5%	thiamine	propranolol	amlodipine	isosorbid	ondansetron	bromopride	omeprazole	heparin	dipyrone	domperidone	metoclopramide	midazolam	pethidine	simethicone										16
110	HCFMRP-USP	electronic	1	omeprazole	colecalciferol	dipyrone	bromopride	enoxaparin																					5
111	HCFMRP-USP	electronic	1	domperidone	thiamine	dipyrone	bromopride																						4
112	HCFMRP-USP	electronic	6	norepinephrine	liposomal amphotericin B	fluconazole	meropenem	polymyxin B	heparin	dipyrone	ondansetron	dexamethasone	fentanyl	midazolam	omeprazole			Insulin human regular											13
113	HCFMRP-USP	electronic	1	aspirin	atorvastatin	atenolol	clonidine	furosemide	dipyrone	bromopride	enoxaparin																		8
114	HCFMRP-USP	electronic	2	dipyrone	bromopride	heparin	cefepime	metronidazole	lactulose	morphine																			7
115	HCFMRP-USP	electronic	1	sulfamethoxazole + trimethoprim	folinic acid	etambutol	azithromycin	rifampicin	fluconazole	omeprazole	bromopride	heparin	dipyrone	tenofovir	lamivudine	efavirenz													13
116	HCFMRP-USP	electronic	1	omeprazole	enoxaparin	bromopride	paracetamol	dipyrone	cilostazol																				6
117	HCFMRP-USP	electronic	1	omeprazole	tramadol	bromopride	dipyrone	clonazepam	quetiapine	imipramina		calcium carbonate	vitamin A	simethicone	pancreatic enzymes	escitalopram													12
118	HCFMRP-USP	electronic	2	paracetamol	cefepime		omeprazole	bromopride	dipyrone	pyridostigmine		enoxaparin	azathioprine	sertraline				mineral oil											10
119	HCFMRP-USP	electronic	2	hydrochlorothiazide	omeprazole	enoxaparin		bromopride	dipyrone	tramadol	clonazepam																		7
120	HCFMRP-USP	electronic	4	meropenem	fentanyla	midazolam	suxamethonium		fentanyl	omeprazole	human albumin	sodium bicarbonate	lactulose			Insulin human regular	glucose 5%	dipyrone	bromopride	ondansetron	furosemide	entecavir							16
121	HCFMRP-USP	electronic	2	enalapril	omeprazole	paracetamol	bromopride	midazolam	pethidine																				6
122	HCFMRP-USP	electronic	0	ceftriaxone	losartan	amlodipine	folic acid	ranitidine	quetiapine	dipyrone	bromopride																		8
123	HCFMRP-USP	electronic	2	tramadol	dipyrone	heparin	omeprazole	metoclopramide	ondansetron	scopolamine	atropine																		8
124	HCFMRP-USP	electronic	1	ceftriaxone	dexamethasone	diltiazem	hydrochlorothiazide	omeprazole	enoxaparin	simethicone	lactulose	dipyrone	glucose 5%	bromopride															11
125	HCFMRP-USP	electronic	1	fluconazole	dexamethasone	clomipramina	carbamazepine	calcium carbonate	omeprazole	enoxaparin	bromopride	paracetamol	diazepam																10
126	HCFMRP-USP	electronic	1	levothyroxine	propranolol	Insulin human regular	glucose 5%	bromopride	ondansetron	dipyrone	losartan	lactulose	folic acid																10
127	HCFMRP-USP	electronic	2	omeprazole	octreotide	enoxaparin	carvedilol	dipyrone	bromopride	Insulin human regular	glucose 5%																		8
128	HCFMRP-USP	electronic	3	meropenem	vancomycin		liposomal amphotericin B	losartan	hydrochlorothiazide	amlodipine	clonidine	Insulin human isophane (NPH)		dipyrone	bromopride	glucose 5%	Insulin human regular												12
129	HCFMRP-USP	electronic	1	dipyrone	morphine	omeprazole	dexamethasone																						4
130	HCFMRP-USP	electronic	0	dipyrone	bromopride	human albumin	glucose 5%	lactulose																					5
131	HCFMRP-USP	electronic	1	prednisone	dipyrone	bromopride	clobazam	lamotrigine	phenobarbital	heparin	diazepam	hydrocortisone		clonazepam															10
132	HCFMRP-USP	electronic	2	oxacillin	tramadol	omeprazole	heparin	atenolol	aspirin	clopidogrel	atorvastatin	quetiapine				isotonic physiological solution	furosemide	haloperidol	paracetamol	dipyrone	bromopride	hydralazine							16
133	HCFMRP-USP	electronic	1	meropenem		vancomycin	gentamicin		omeprazole	phenobarbital	human alphaepoetin	tramadol	levothyroxine	potassium chloride		paracetamol	bromopride	hydrocortisone											12
134	HCFMRP-USP	electronic	1	ceftriaxone	clindamycin	phenytoin	phenobarbital	valproic acid	enoxaparin	ibuprofeno	bromopride	dexchlorpheniramine				chloroquine													10
135	HCFMRP-USP	electronic	2	metronidazole	enoxaparin	tramadol		potassium chloride	bromopride	dipyrone	folic acid																		7
136	HCFMRP-USP	electronic	0	piperacillin + tazobactam		dipyrone	bromopride																						3
137	HCFMRP-USP	electronic	3	scopolamine	morphine		bromopride	dipyrone	metoclopramide	heparin	Insulin human regular	glucose 5%		omeprazole		dexamethasone	ondansetron	meropenem	meropenem										13
138	HCFMRP-USP	electronic	2	dipyrone	bromopride	enoxaparin	amoxicillin + clavulanate	amitriptyline	carbamazepine	tramadol																			7
139	HCFMRP-USP	electronic	3	alizapride		ciprofloxacin		voriconazole	metronidazole	omeprazole	scopolamine	methadone	potassium chloride			dipyrone	ondansetron	morphine	Insulin human regular	paracetamol									13
140	HCFMRP-USP	electronic	3	glucose 5%	Insulin human regular	methadone	dexamethasone	dipyrone	ondansetron	amitriptyline	gabapentin	morphine																	9
141	HCFMRP-USP	electronic	2	piperacillin + tazobactam			dipyrone	omeprazole	tramadol	enoxaparin	vitamin A	magnesium oxide																	7
142	HCFMRP-USP	electronic	1	lactulose	simethicone	bromopride	dipyrone	exemestane	propranolol	human albumin																			7
143	HCFMRP-USP	electronic	1	ondansetron	cefepime	pyridostigmine	prednisone		quetiapine	paracetamol	bromopride	mirtazapine	pantoprazol	enoxaparin															10
144	HCFMRP-USP	electronic	3	levothyroxine	dipyrone	morphine	ondansetron	furosemide	midazolam	pethidine	ranitidine																		8
145	HCFMRP-USP	electronic	2	meropenem	fluconazole		gentamicin	tramadol	omeprazole	quetiapine	dexchlorpheniramine	folic acid	prednisone	heparin				furosemide	bromopride	dipyrone		hidroxichloroquine							14
146	HCFMRP-USP	electronic	1	dipyrone	morphine	scopolamine																							3
147	HCFMRP-USP	electronic	5	prednisone	enalapril	bisoprolol	lactulose	salbutamol	ipratropium		bromopride	cefazolin	metronidazole	dipyrone	tramadol	hydrocortisone	remifentanyl	propofol	morphine	fentanyl									16
148	HCFMRP-USP	electronic	2	morphine	dipyrone		amitriptyline	bromopride	ondansetron	omeprazole	enoxaparin	clonazepam																	8
149	HCFMRP-USP	electronic	3	hydroxyurea	dipyrone	lactulose	carvedilol	enalapril	digoxin	ceftriaxone	clindamycin	tramadol	enoxaparin																10
150	HCFMRP-USP	electronic	2	warfarin	azathioprine	pyridostigmine	amitriptyline	dexchlorpheniramine	dipyrone	bromopride	immune globulin																		8
151	HCFMRP-USP	electronic	2	meropenem	vancomycin	enalapril	amlodipine	sildenafil	warfarin	amiodarone	omeprazole	tramadol	dipyrone	bromopride															11
152	HCFMRP-USP	electronic	1	acyclovir	fluconazole	bromopride	omeprazole	domperidone	rifampicin + isoniazid + pyrazinamide + ethambutol	heparin	dipyrone	ondansetron																	9
153	HCFMRP-USP	electronic	2	sertraline	hydrochlorothiazide	aspirin	diazepam	bromopride	ondansetron	enoxaparin	clonidine	dipyrone	loperamide	losartan	olanzapine	dexamethasone	morphine		lactulose	bisacodyl	scopolamine	simethicone							18
154	HCFMRP-USP	electronic	4	norepinephrine	fentanyla	midazolam		ceftriaxone	oxacillin	amiodarone EV	clindamycin	vitamin K																	8
155	HCFMRP-USP	electronic	2	cefuroxime	omeprazole	enalapril	carvedilol		heparin	Insulin human regular	glucose 5%	dipyrone	bromopride	glyphophysiological solution															10
156	HCFMRP-USP	electronic	3	tramadol	ranitidine	scopolamine	bromopride	enoxaparin			dipyrone	isotonic physiological solution	morphine		ondansetron														9
157	HCFMRP-USP	electronic	1	amoxicillin + clavulanate	fluconazole		omeprazole	lactulose	sodium bicarbonate	ipratropium	dipyrone	bromopride	enoxaparin																9
158	HCFMRP-USP	electronic	6	meropenem	spironolactone	lactulose	levothyroxine	carvedilol	simethicone	ferrous sulphate	vitamin C	enalapril	enoxaparin		midazolam	safentanyla	etomidate	morphine	dipyrone	tramadol	bromopride								17
159	HCFMRP-USP	electronic	0	glucose 5%	human albumin	pentoxifylline	lactulose	thiamine + pyridoxine + cobalamin	omeprazole	dipyrone	metoclopramide																		8
160	HCFMRP-USP	electronic	2	clonazepam	omeprazole	morphine		ondansetron	bromopride	dexamethasone	terbutaline	furosemide	fentanyl	cefepime	vancomycin														11
161	HCFMRP-USP	electronic	2	tramadol	dipyrone		ondansetron	bromopride		omeprazole	enoxaparin																		6
162	HCFMRP-USP	electronic	2	pyridostigmine	vitamin B complex		ranitidine	enoxaparin	paracetamol	bromopride	dipyrone			immune globulin		neostigmine	atropine EV												10
163	HCFMRP-USP	electronic	1	morphine			dipyrone	bromopride	lactulose		meropenem	vancomycin	cefazolin																7
164	HCFMRP-USP	electronic	2	Insulin human isophane (NPH)	aspirin	ferrous sulphate	simvastatin	prednisone	salbutamol	ipratropium	omeprazole	heparin	bromopride	dipyrone	amoxicillin + clavulanate														12
165	HCFMRP-USP	electronic	2	morphine	ondansetron	dipyrone	omeprazole	ceftriaxone	heparin																				6
166	HCFMRP-USP	electronic	1	ondansetron	bromopride	omeprazole	ceftriaxone	Insulin human regular	enalapril																				6
167	HCFMRP-USP	electronic	2	salbutamol	ipratropium	levothyroxine	bromopride	Insulin human regular	glucose 5%	omeprazole	polymyxin B	meropenem	tigecycline	lactulose					cobalamin	dipyrone	tramadol								14
168	HCFMRP-USP	electronic	2	meropenem	heparin	atenolol	lamotrigine	phenytoin	clobazam	omeprazole	bromopride	dipyrone	promethazine																10
169	HCFMRP-USP	electronic	4	piperacillin + tazobactam	isotonic physiological solution		omeprazole	dipyrone	metoclopramide	glucose 5%	Insulin human regular	sodium bicarbonate	norepinephrine	fentanyl	human albumin						midazolam								12
170	HCFMRP-USP	electronic	5	midazolam	pethidine		simvastatin	aspirin	enoxaparin	omeprazole	morphine	dipyrone	bromopride		Insulin human regular														10
171	HCFMRP-USP	electronic	1	cobalamin	losartan	hydrochlorothiazide	simvastatin	enoxaparin			bromopride	dipyrone																	7
172	HCFMRP-USP	electronic	2	bromopride	dipyrone	tramadol	enoxaparin																						4
173	HCFMRP-USP	electronic	0	clonidine	propranolol		omeprazole	norfloxacino	lactulose		dipyrone	bromopride																	7
174	HCFMRP-USP	electronic	2	tramadol	ondansetron	omeprazole	dipyrone	lactulose	haloperidol		potassium chloride	enoxaparin	paracetamol																9
175	HCFMRP-USP	electronic	2	ciprofloxacin	methadone	prednisone	paroxetine	levothyroxine	scopolamine	omeprazole	enoxaparin	bromopride	dipyrone	isotonic physiological solution			ranitidine												12
176	HCFMRP-USP	electronic	1	ceftriaxone	clindamycin	metoclopramide	dipyrone	omeprazole	enoxaparin																				6
177	HCFMRP-USP	electronic	1	calcium carbonate	omeprazole	loperamide	enoxaparin	paracetamol	ondansetron	captopril																			7
178	HCFMRP-USP	electronic	3	dipyrone	ondansetron	bromopride	dexamethasone	olanzapine	fluoruracil	enoxaparin	midazolam	pethidine																	9
179	HCFMRP-USP	electronic	1	dipyrone	bromopride	heparin																							3
180	HCFMRP-USP	electronic	1	rifampicin + isoniazid + pyrazinamide + ethambutol	pyridoxine	bromopride	dipyrone	enoxaparin																					5
181	HCFMRP-USP	electronic	3	cefepime	clindamycin	ranitidine	enoxaparin	warfarin	enalapril	hydrochlorothiazide	amlodipine	thiamine	dipyrone	bromopride	Insulin human regular														12
182	HCFMRP-USP	electronic	2	haloperidol	levothyroxine	morphine	amitriptyline	lactulose	dipyrone	ondansetron	enoxaparin		bisacodyl	escitalopram	simethicone	domperidone													12
183	HCFMRP-USP	electronic	2	meropenem		gentamicin			methylprednisolone	salbutamol	ipratropium	isoniazida + rifampicina	colchicina	quetiapine	haloperidol	heparin	omeprazole	bromopride		dipyrone	Insulin human regular								14
184	HCFMRP-USP	electronic	2	omeprazole	bromopride	dipyrone	tramadol	heparin	topiramate		phenobarbital		lamotrigine	sertraline	clobazam	potassium chloride													11
185	HCFMRP-USP	electronic	1	dipyrone	bromopride	salbutamol	enoxaparin	beclometasona	mirtazapine																				6
186	HCFMRP-USP	electronic	1	metronidazole	albendazole	allopurinol	omeprazole	dipyrone	bromopride	enoxaparin																			7
187	HCFMRP-USP	electronic	2	aspirin	dipyrone	thiamine + pyridoxine + cyanocobalamin	tramadol	bromopride	salbutamol	ipratropium		amlodipine	levothyroxine	potassium chloride	lactulose	calcium phosphate tribasic	omeprazole	enoxaparin											14
188	HCFMRP-USP	electronic	1	prednisone	amlodipine	losartan	atenolol	hydrochlorothiazide	paracetamol	omeprazole	ondansetron	heparin	human alphaepoetin		cefepime	dipyrone	vancomycin	dexchlorpheniramine											14
189	HCFMRP-USP	electronic	2	ceftriaxone	clindamycin	tramadol	levodopa + benserazide	aspirin	simvastatin	domperidone		heparin	dipyrone	ondansetron	pramipexole	galantamine	indapamide	diosmin + hesperidin											14
190	HCFMRP-USP	electronic	1	dipyrone	ondansetron	bromopride	heparin	glucose 5%	ceftriaxone	metronidazole																			7
191	HCFMRP-USP	electronic	0	dipyrone	metoclopramide	thiamine	lorazepam		cobalamin	potassium chloride																			6
192	HCFMRP-USP	electronic	2	ceftriaxone	clindamycin			dipyrone	ondansetron	morphine		enoxaparin																	6
193	HCFMRP-USP	electronic	1	iron	enoxaparin	dipyrone	bromopride	ondansetron	vitamin E	thiamine	omeprazole																		8
194	HCFMRP-USP	electronic	2	ondansetron	morphine	omeprazole	dipyrone	bromopride		heparin		dexamethasone		glucose 5%															8
195	HCFMRP-USP	electronic	0	amitriptyline	bromopride	dipyrone	bromazepam																						4
196	HCFMRP-USP	electronic	0	carvedilol	furosemide	isosorbid	omeprazole	glucose 5%	simethicone	ondansetron	dipyrone		lactulose																9
197	HCFMRP-USP	electronic	2	dipyrone	bromopride	Insulin human regular	glucose 5%	omeprazole	Insulin human isophane (NPH)	scopolamine	lactulose	ondansetron	human albumin																10
198	HCFMRP-USP	electronic	4	fentanyl	norepinephrine	meropenem	vancomycin	polymyxin B	amikacin	omeprazole	dipyrone	bromopride	scopolamine	ondansetron	furosemide	heparin	levothyroxine	simethicone	prednisone	potassium chloride					hidroxichloroquine	rivaroxaban			19
199	HCFMRP-USP	electronic	3	ceftriaxone	clindamycin	phenytoin	methylprednisolone	tramadol	enoxaparin	omeprazole	dipyrone	bromopride	pentoxifylline	alprostadil	nifedipine	dexchlorpheniramine	morphine	immune globulin											15
200	HCFMRP-USP	electronic	0	carvedilol	hydralazine	isosorbid	atorvastatin	dipyrone	bromopride	omeprazole	aspirin	allopurinol																	9
201	HCFMRP-USP	electronic	0	carbamazepine	valproic acid	topiramate	clozapine	clobazam	diazepam	dipyrone	bromopride	lactulose																	9
202	HCFMRP-USP	electronic	2	gentamicin	ampicilin	micafungin	furosemide	morphine	bromopride	dipyrone	enoxaparin	vitamin C	colecalciferol	vitamin E	enalapril	spironolactone	aspirin	paracetamol											15
203	HCFMRP-USP	electronic	1	omeprazole	palonosetron	dexchlorpheniramine	dipyrone	ondansetron	enoxaparin	dexamethasone																			7
204	HCFMRP-USP	electronic	2	micafungin	ciprofloxacin	ceftazidime	tramadol	omeprazole	bromopride	bezafibrato	lactulose	prednisone	diazepam	dipyrone	glucose 5%	Insulin human regular			clobazam										14
205	HCFMRP-USP	electronic	0	amoxicillin + clavulanate	omeprazole	amlodipine	bromopride	dipyrone	quetiapine	furosemide	sodium bicarbonate																		8
206	HCFMRP-USP	electronic	2	salbutamol	ipratropium	dipyrone	bromopride			morphine	omeprazole	enoxaparin	lactulose																8
207	HCFMRP-USP	electronic	2	tramadol	ketoprofen	omeprazole	enoxaparin	amitriptyline	propranolol	paracetamol					bromopride	simethicone													9
208	HCFMRP-USP	electronic	1	amoxicillin + clavulanate	enoxaparin		dipyrone	bromopride																					4
209	HCFMRP-USP	electronic	1	ceftazidime		gentamicin	omeprazole	amlodipine	atenolol	isosorbid	aspirin	clopidogrel	atorvastatin	valproic acid	heparin	dipyrone	bromopride												13
210	HCFMRP-USP	electronic	1	clopidogrel	aspirin	isosorbid	bisoprolol	hydralazine	calcitriol	alfapoetina	Insulin human regular	dipyrone	chlorpromazine	ondansetron															11
211	HCFMRP-USP	electronic	2	omeprazole	morphine		bromopride	ondansetron	salbutamol	dipyrone	valproic acid			scopolamine			lactulose	amitriptyline		clobazam	sertraline			bisacodyl	rivaroxaban				14
212	HCFMRP-USP	electronic	2	vancomycin	furosemide	calcium polystyrenesulfonate		ipratropium	salbutamol	hydralazine	omeprazole	heparin		dipyrone	bromopride	Insulin human regular	glucose 5%												12
213	HCFMRP-USP	electronic	1	phenytoin	levothyroxine	propranolol	losartan	sertraline	simvastatin	omeprazole	desonide		mineral oil	enoxaparin	dipyrone	bromopride	clonazepam												13
214	HCFMRP-USP	electronic	0	cefepime	simvastatin	prednisone	lactulose	bromopride	dipyrone	isotonic physiological solution	salbutamol	ipratropium	formoterol + budesonide				simethicone		bisacodyl										12
215	HCFMRP-USP	electronic	0	ceftriaxone	ondansetron	bromopride	dipyrone	glucose 5%		human albumin		propranolol																	7
216	HCFMRP-USP	electronic	0	amoxicillin + clavulanate	dipyrone	bromopride	enoxaparin																						4
217	HCFMRP-USP	electronic	2	dipyrone	tramadol	bromopride	omeprazole	furosemide	Ringer's lactate solution	enoxaparin	levothyroxine	spironolactone	quetiapine	lactulose			potassium chloride												12
218	HCFMRP-USP	electronic	1	ampicillin + sulbactam	omeprazole	ferrous sulphate	dipyrone	bromopride	glucose 5%	ipratropium	tramadol																		8
219	HCFMRP-USP	electronic	1	omeprazole	iron		hydralazine	isosorbid	sertraline	bisoprolol	amiodarone	domperidone	levothyroxine	heparin	human alphaepoetin	clonazepam	dipyrone	bromopride	ondansetron										15
220	HCFMRP-USP	electronic	1	enoxaparin	cobalamin	dipyrone	bromopride	hydrocortisone		ceftriaxone																			6
221	HCFMRP-USP	electronic	2	scopolamine	omeprazole	enoxaparin	ciprofloxacin	tramadol	carbamazepine	topiramate	phenobarbital	clobazam	simvastatin			dipyrone	bromopride												12
222	HCFMRP-USP	electronic	1	phenytoin	dexamethasone	dipyrone	bromopride	omeprazole	enoxaparin																				6
223	HCFMRP-USP	electronic	2	haloperidol	dexamethasone	morphine	omeprazole	bromopride	enoxaparin	fluconazole	glucose 5%		quetiapine	lactulose															10
224	HCFMRP-USP	electronic	2	potassium chloride	omeprazole	baclofen	methadone	sertraline	carbamazepine	enoxaparin			cetoconazol		isotonic physiological solution	dipyrone	bromopride	furosemide		hydroxyzine									13
225	HCFMRP-USP	electronic	0	phenytoin	quetiapine	prednisone	salbutamol	ipratropium	dipyrone	bromopride																			7
226	HCFMRP-USP	electronic	0	piperacillin + tazobactam	human albumin sérica	bromopride	dipyrone		salbutamol	ipratropium	lactulose	glucose 5%																	8
227	HCFMRP-USP	electronic	1	vancomycin		omeprazole	dipyrone	bromopride	lactulose	Insulin human regular																			6
229	HEAB	electronic	0	dipyrone	metoclopramide	glucose 5%																							3
230	HEAB	electronic	1	cefepime	isotonic physiological solution		saccharomyces boulardii	ranitidine	finasteride	doxazosin	risperidone		metronidazole		dipyrone		tramadol	bromopride											11
231	HEAB	electronic	1	amoxicillin + clavulanate		isotonic physiological solution	glyphophysiological solution	atenolol	heparin	fenoterol	ipratropium	risperidone		dipyrone	bromopride	glucose 5%													11
232	HEAB	electronic	1	levothyroxine	dipyrone	simvastatin	aspirin	clopidogrel	ranitidine		paracetamol + codeine	Insulin human isophane (NPH)																	8
233	HEAB	electronic	1	glyphophysiological solution	morphine	isotonic physiological solution		dipyrone	gabapentin																				5
234	HEAB	electronic	2	cefepime		isotonic physiological solution		aspirin	ranitidine	lactulose	ipratropium	heparin		tramadol	dipyrone	bromopride	loratadine			risperidone									12
235	HEAB	electronic	1	ceftriaxone		clindamycin		isotonic physiological solution				dipyrone	paracetamol	bromopride	heparin	aspirin	simvastatin	phenytoin	glucose 5%	methylprednisolone				omeprazole		folic acid		albendazole	15
236	HEAB	electronic	2	ceftriaxone	isotonic physiological solution	clindamycin		tramadol	aspirin	simvastatin	domperidone	lactulose	heparin	dipyrone	ondansetron	levodopa + benserazide	pramipexole	indapamide	galantamine	diosmin + hesperidin									16
237	HEAB	electronic	2	ranitidine	aspirin	heparin		dipyrone	bromopride	tramadol	atorvastatin																		7
238	HEAB	electronic	1	amoxicillin + clavulanate	isotonic physiological solution	glyphophysiological solution	heparin	risperidone		haloperidol	dipyrone	bromopride																	8
239	HEAB	electronic	2	glucose 5%		ceftriaxone	isotonic physiological solution	potassium chloride		heparin	ranitidine	bromopride	dipyrone																8
240	HEAB	electronic	1	glyphophysiological solution	aspirin	heparin	dipyrone	bromopride	diazepam	valproic acid	ceftriaxone	isotonic physiological solution	clarithromycin																10
241	HEAB	electronic	1	levothyroxine	dipyrone	bromopride	carvedilol	amlodipine	aspirin	potassium chloride	lactulose	simvastatin	heparin																10
242	HEAB	electronic	1	meropenem	isotonic physiological solution	glyphophysiological solution	losartan	propranolol	heparin		bromopride	risperidone	paracetamol																9
243	HEAB	electronic	2	ceftriaxone	isotonic physiological solution	clindamycin				methadone	dipyrone	simethicone	scopolamine	risperidone	clonazepam	sertraline	valproic acid	nifedipine	aspirin	lactulose	heparin	paracetamol	bromopride		picosulphate				18
244	HEAB	electronic	1	clopidogrel	ranitidine	aspirin	hydrochlorothiazide	amlodipine	domperidone	chlorpromazine		baclofen	heparin	atorvastatin															10
245	HEAB	electronic	0	glyphophysiological solution	dipyrone	bromopride																							3
246	HEAB	electronic	1	ceftriaxone	isotonic physiological solution	enalapril	aspirin	fenoterol	ipratropium	hydrocortisone	heparin	acetylcysteine	dipyrone	bromopride	metoprolol														12
247	HEAB	electronic	2	ceftriaxone	fenoterol	ipratropium	aspirin	clonazepam	levomepromazine	heparin	furosemide	tramadol	haloperidol	dipyrone	bromopride														12
248	HEAB	electronic	2	levothyroxine	enalapril		spironolactone	amlodipine	aspirin	dipyrone		bromopride	enoxaparin	atorvastatin	Insulin human isophane (NPH)														10
249	HEAB	electronic	3	risperidone	haloperidol	promethazine	captopril	amiodarone	levothyroxine	aspirin	vitamin B complex		picosulphate	lactulose			Ringer's lactate solution		heparin	dipyrone	bromopride	atorvastatin	mirtazapine	amlodipine		clonidine	midazolam		19
250	HEAB	electronic	0	ceftriaxone		isotonic physiological solution		clarithromycin				carvedilol	levothyroxine	ranitidine	simvastatin	furosemide	folic acid	vitamin B complex	clonazepam	fenoterol	ipratropium		bromopride	dipyrone	escitalopram	galantamine			17
251	HEAB	electronic	3	enalapril	phenytoin	warfarin	enoxaparin	bromopride	dipyrone	glucose 5%	Insulin human regular	simvastatin																	9
252	HEAB	electronic	2	aspirin	clopidogrel	simvastatin	amlodipine	enalapril	metformin	dipyrone	bromopride	enoxaparin	glucose 5%																10
253	HEAB	electronic	1	isotonic physiological solution	ceftriaxone		heparin	ranitidine	amlodipine	dipyrone	bromopride	glucose 5%	clonidine																9
254	HEAB	electronic	1	amoxicillin + clavulanate	isotonic physiological solution					aspirin	simvastatin	heparin		dipyrone	bromopride	glucose 5%													8
255	HEAB	electronic	3	prednisone	risperidone	phenytoin	ranitidine	clonazepam	lactulose	sertraline	baclofen	fenoterol	ipratropium			heparin	bromopride	morphine	tramadol	dipyrone	amoxicillin + clavulanate		isotonic physiological solution						17
256	HEAB	electronic	4	aspirin	simvastatin	enoxaparin	Insulin human isophane (NPH)	metformin	paracetamol	bromopride	glucose 5%	Insulin human regular																	9
257	HEAB	electronic	1	dipyrone	bromopride	heparin	glyphophysiological solution		haloperidol																				5
258	HEAB	electronic	1	amlodipine	hydrochlorothiazide	enalapril	aspirin	dipyrone	bromopride		heparin	atorvastatin	risperidone																9
259	HEAB	electronic	2	cefepime		isotonic physiological solution		morphine		losartan	levodopa + benserazide	valproic acid	furosemide	ranitidine	lactulose	ipratropium	fenoterol	heparin	dipyrone	ondansetron		hydrocortisone							15
260	HEAB	electronic	1	piperacillin + tazobactam	morphine		ondansetron	dipyrone	phenobarbital	scopolamine	simethicone	ipratropium				isotonic physiological solution													9
261	HEAB	electronic	2	ranitidine	baclofen	tramadol	diazepam	lactulose	risperidone	dipyrone	bromopride	heparin	fenoterol	ipratropium															11
262	HEAB	electronic	3	amoxicillin + clavulanate		isotonic physiological solution		dipyrone	tramadol				glyphophysiological solution		heparin		morphine	bromopride	glucose 5%	galantamine	haloperidol								11
263	HEAB	electronic	1	enalapril	hydrochlorothiazide	aspirin	clopidogrel	atorvastatin	dipyrone	bromopride	heparin	ranitidine	glucose 5%																10
264	HEAB	electronic	1	ceftriaxone	isotonic physiological solution	clindamycin		ranitidine	aspirin	clopidogrel	scopolamine	prednisone	ipratropium	heparin	dipyrone	bromopride	captopril	risperidone	glucose 5%										15
265	HEAB	electronic	2	isotonic physiological solution	tramadol	dipyrone	bromopride	heparin	piperacillin + tazobactam				phenytoin	glyphophysiological solution															8
266	HEAB	electronic	1	aspirin	amlodipine	losartan	simvastatin	risperidone	dipyrone	bromopride	heparin																		8
267	HEAB	electronic	3	scopolamine	carbamazepine	ranitidine	tramadol	enoxaparin	bromopride	dipyrone	tetracycline	topiramate	clobazam		phenobarbital		liposomal amphotericin B												12
268	HEAB	electronic	1	ceftriaxone	isotonic physiological solution	clindamycin		ondansetron	aspirin	atorvastatin	hydrochlorothiazide	amlodipine	losartan	heparin	dipyrone	bromopride	risperidone		glyphophysiological solution	potassium chloride									15
269	HEAB	electronic	1	aspirin	amlodipine	omeprazole	hydralazine	metoprolol	furosemide	hydrochlorothiazide	isotonic physiological solution		dipyrone	bromopride	ondansetron	heparin													12
270	HEAB	electronic	2	morphine	dipyrone	hydrocortisone	bromopride	fenoterol	ipratropium	omeprazole	enoxaparin	acetylcysteine	clonazepam		ondansetron	tenofovir + lamivudine + efavirenz													12
271	HEAB	electronic	1	losartan	dipyrone	metoclopramide	simvastatin	aspirin	Insulin human regular	glucose 5%																			7
272	HEAB	electronic	2	gabapentin	fluoxetine	losartan	glibenclamide	hydrochlorothiazide	metformin	paracetamol + codeine	clonazepam	bromopride	dipyrone																10
273	HEAB	electronic	0	isotonic physiological solution		dipyrone	bromopride	glucose 5%																					4
274	HEAB	electronic	1	isotonic physiological solution	ceftriaxone		clarithromycin		dipyrone	bromopride	heparin																		6
275	HEAB	electronic	2	isotonic physiological solution	aspirin	simvastatin	risperidone	ranitidine	lactulose	picosulphate	heparin	Insulin human isophane (NPH)	glucose 5%			dipyrone	bromopride												12
276	HEAB	electronic	1	cefepime	glucose 5%	ranitidine	prednisone	lactulose	aspirin	clopidogrel	atorvastatin	enoxaparin	fenoterol	ipratropium	dipyrone	ondansetron													13
277	HEAB	electronic	2	flumazenil	amoxicillin + clavulanate		dipyrone	aspirin	bromopride	isotonic physiological solution	risperidone	Insulin human regular	heparin	glucose 5%															10
278	HEAB	electronic	2	acetylcysteine	tramadol	baclofen	bromopride	heparin	ondansetron	dipyrone																			7
279	HEAB	electronic	1	clonidine	captopril	amlodipine	hydrochlorothiazide			heparin	bromopride	dipyrone		haloperidol	lorazepam	simvastatin	glyphophysiological solution												11
280	HEAB	electronic	2	carvedilol	furosemide	spironolactone	losartan	amlodipine	simvastatin	vitamin B complex	risperidone	heparin	tramadol	dipyrone	bromopride	glucose 5%			cefepime	isotonic physiological solution		metronidazole							16
281	HEAB	electronic	2	Insulin human isophane (NPH)	potassium chloride	warfarin	aspirin	simvastatin	carvedilol	isosorbid	hydralazine	ranitidine			dipyrone	bromopride	glucose 5%												12
282	HES	electronic	2	amoxicillin + clavulanate	amlodipine	dipyrone	Insulin human regular	metoclopramide	glucose 25%	haloperidol	simvastatin	omeprazole	phenytoin																10
283	HES	electronic	4	isotonic physiological solution	Insulin human regular	glucose 25%	dipyrone	metoclopramide	haloperidol	ranitidine	heparin	morphine	losartan	lactulose															11
284	HES	electronic	3	isotonic physiological solution	metronidazole	ciprofloxacin	enoxaparin	Insulin human regular	Insulin human isophane (NPH)	metoclopramide	simvastatin	aspirin	enalapril	amlodipine	dipyrone	bromopride	sertraline	fenoterol	albendazole										16
285	HES	electronic	0	dipyrone	metoclopramide	aspirin	simvastatin	losartan	hydrochlorothiazide																				6
286	HES	electronic	1	amoxicillin + clavulanate	Insulin human regular	losartan	hydrochlorothiazide	aspirin	simvastatin	amlodipine																			7
287	HES	electronic	2	Insulin human regular	sodium nitroprusside	dipyrone	metoclopramide	glucose 25%	enalapril	hydralazine	ranitidine	propatylnitrate	amlodipine																10
288	HES	electronic	3	enoxaparin	Insulin human regular	metoclopramide	aspirin	simvastatin	glucose 25%	dipyrone	nitrofurantoin	clopidogrel																	9
289	HES	electronic	4		Insulin human regular	dipyrone	tramadol	losartan	carvedilol	Von Willebrand Factor Recombinan	enoxaparin	amlodipine	lactulose	bromopride	dimethicone	ondansetron	hypertonic glucose 50%												13
290	HES	electronic	2	isotonic physiological solution	Insulin human regular	atenolol	glucose 25%																						4
291	HES	electronic	4	isotonic physiological solution	Insulin human regular	Insulin human isophane (NPH)	dipyrone	aspirin	simvastatin	ranitidine	glucose 25%	atenolol	phenytoin	hydralazine	bromopride	dimethicone	mineral oil	hydrochlorothiazide	heparin										16
292	HES	electronic	2	acyclovir	amoxicillin + clavulanate	aspirin	simvastatin	dipyrone	metoclopramide	heparin	enalapril	amlodipine	risperidone	glucose 25%	vitamin B complex	thiamine	phenytoin	hydralazine	omeprazole										16
293	HES	electronic	3	Insulin human regular	enoxaparin	phenytoin	aspirin	simvastatin	dipyrone	metoclopramide	carbamazepine	potassium chloride	ranitidine																10
294	HES	electronic	2		isotonic physiological solution	amoxicillin + clavulanate	Insulin human regular	enoxaparin	dipyrone	metoclopramide	aspirin	simvastatin	losartan	amlodipine	doxazosin	omeprazole													12
295	HES	electronic	4	ciprofloxacin	morphine	Insulin human regular	losartan	amlodipine	dipyrone	metoclopramide	heparin	ranitidine	hydralazine	phenytoin	domperidone	glucose 25%													13
296	HES	electronic	3	enoxaparin		scopolamine	furosemide	domperidone	dexamethasone		glucose 25%	dipyrone	sertraline	tramadol	ranitidine	dimethicone	metoclopramide	isotonic physiological solution											13
297	HES	electronic	1	isotonic physiological solution	cefepime	dipyrone	heparin	ranitidine	baclofen																				6
298	HES	electronic	2	Insulin human regular	dipyrone	ondansetron	levothyroxine	amlodipine	simvastatin	glucose 25%	enalapril		ranitidine																9
299	HES	electronic	3	glucose 10%	sodium chloride 20%	Insulin human regular	enoxaparin	haloperidol	phenytoin	dipyrone	metoclopramide		omeprazole	thiamine															10
300	HES	electronic	2	amoxicillin + clavulanate	Insulin human regular	dipyrone	metoclopramide	glucose 25%	simvastatin	aspirin	hydrocortisone	ipratropium	fenoterol																10
301	HES	electronic	0	amoxicillin + clavulanate	levothyroxine	clonazepam	simvastatin	dipyrone	metoclopramide	ranitidine	levodopa + benserazide	nortriptyline	biperiden	isotonic physiological solution	ranitidine														12
303	HES	electronic	2	glucose 5%	enoxaparin	morphine	dipyrone	ondansetron	ranitidine	simvastatin	potassium chloride	deslanoside	atenolol																10
304	HES	electronic	4	enoxaparin	Insulin human regular	Insulin human isophane (NPH)	furosemide	carvedilol	spironolactone	aspirin	clopidogrel	enalapril	dipyrone	ranitidine	metoclopramide	glucose 25%													13
308	HES	electronic	2	amoxicillin + clavulanate	Insulin human regular	ranitidine	losartan	metoclopramide	dipyrone	glucose 25%	amlodipine																		8
414	HSVP	handwritten	0	levofloxacin	dipyrone	furosemide	carvedilol	phenytoin	phenobarbital	acebrophilin																			7
415	HSVP	handwritten	0	ranitidine	losartan	isotonic physiological solution		bromopride	dipyrone	ferromaltose																			6
416	HSVP	handwritten	1		dipyrone	bromopride	ranitidine	ceftriaxone	lamotrigine	Insulin human regular																			6
417	HSVP	handwritten	1	levofloxacin	dipyrone	bromopride	ranitidine	xarelto	quetiapine																				6
421	HSVP	handwritten	0	bromopride	ranitidine	ceftriaxone	dipyrone																						4
423	HSVP	handwritten	0	dipyrone	levofloxacin	ceftriaxone	hydrocortisone	aminophylline	fenoterol	ipratropium	furosemide																		8
424	HSVP	handwritten	1	cephalothin	clonazepam	bromopride	Insulin human isophane (NPH)																						4
425	HSVP	handwritten	1	dipyrone	metoclopramide	heparin	ranitidine	phenytoin	ceftriaxone	paracetamol																			7
426	HSVP	handwritten	0	diazepam	simethicone																								2
427	HSVP	handwritten	2	levofloxacin	dipyrone	sodium chloride 3%	ranitidine	aspirin	heparin																				6
428	HSVP	handwritten	0	ceftriaxone	dipyrone	hydrocortisone																							3
429	HSVP	handwritten	0	phenytoin	dexamethasone	furosemide	ceftriaxone	dipyrone	aspirin																				6
430	HSVP	handwritten	2	ranitidine	domperidone		tramadol	vitamin B complex	hypertonic glucose 50%																				5
432	HSVP	handwritten	1	glucose 5%	potassium chloride EV	vitamin B complex	loperamide	bromopride	dipyrone	cimetidine	levofloxacin																		8
487	HSCRGS	electronic	3	metoclopramide	tramadol	dipyrone	ketoprofen	hypertonic glucose 50%	morphine	ondansetron	amoxicillin + clavulanate																		8
488	HSCRGS	electronic	2	metoclopramide	dipyrone	hypertonic glucose 50%	Insulin human regular	furosemide	clonidine	omeprazole	enalapril	simvastatin	zolpidem																10
489	HSCRGS	electronic	2	zidovudine	metoclopramide	dipyrone	hypertonic glucose 50%	Insulin human regular	mannitol	phenytoin	ketoprofen	ondansetron	glyphophysiological solution																10
490	HSCRGS	electronic	1	Insulin human regular	aspirin	clopidogrel	metoclopramide	dipyrone	glyphophysiological solution																				6
491	HSCRGS	electronic	3	dipyrone	metoclopramide	clopidogrel	phenytoin	simvastatin	enoxaparin	Insulin human regular	hypertonic glucose 50%																		8
492	HSCRGS	electronic	2	hypertonic glucose 50%	Insulin human regular	dipyrone	isotonic physiological solution																						4
493	HSCRGS	electronic	2	dipyrone	metoclopramide	hypertonic glucose 50%	clonazepam	haloperidol	esomeprazole	tramadol	ondansetron	isotonic physiological solution																	9
494	HSCRGS	electronic	3	dipyrone	metoclopramide	Insulin human regular	hypertonic glucose 50%	thiamine	omeprazole	megestrol	metoprolol	ferrocarbon + associations	enoxaparin	sertraline	rifampicin + isoniazid + pyrazinamide + ethambutol	isotonic physiological solution													13
495	HSCRGS	electronic	0	captopril	aspirin	phenytoin	clopidogrel	simvastatin																					5
496	HSCRGS	electronic	2	paracetamol + codeine	ketoprofen	phenytoin	Insulin human regular	hypertonic glucose 50%	aspirin	metoclopramide	clopidogrel	simvastatin	dipyrone																10
497	HSCRGS	electronic	2	metoclopramide	dipyrone	Insulin human isophane (NPH)	hypertonic glucose 50%	captopril	valproic acid	aspirin	simvastatin	atenolol	hydrochlorothiazide																10
498	HSCRGS	electronic	2	haloperidol	isotonic physiological solution	Insulin human regular	hypertonic glucose 50%	dipyrone	metoclopramide	omeprazole	ondansetron	glucose 5%																	9
499	HSCRGS	electronic	5	Insulin human regular	hypertonic glucose 50%	carvedilol	aspirin	piperacillin + tazobactam	dipyrone	isotonic physiological solution	morphine	tramadol	enoxaparin	cilostazol															11
500	HSCRGS	electronic	2	ondansetron	metoclopramide	dipyrone	Insulin human regular	hypertonic glucose 50%	atorvastatin																				6
501	HSCRGS	electronic	4	Insulin human regular	hypertonic glucose 50%	isotonic physiological solution	dipyrone		fentanyl	midazolam	scopolamine	metoclopramide	deslanoside																9
502	HSCRGS	electronic	5	metoclopramide	dipyrone	hypertonic glucose 50%	Insulin human regular	tramadol	phenytoin	furosemide	glyphophysiological solution	ketoprofen	cephalothin	ondansetron	morphine	ephedrine													13
503	HSCRGS	electronic	4	dipyrone	metoclopramide	Insulin human regular	Insulin human isophane (NPH)		isotonic physiological solution	aspirin	atorvastatin	ranitidine	clopidogrel	enoxaparin	furosemide	morphine													12
504	HSCRGS	electronic	2	metoclopramide	omeprazole	hypertonic glucose 50%	Insulin human regular	haloperidol	captopril	isotonic physiological solution	dipyrone																		8
505	HSCRGS	electronic	2	Insulin human regular	hypertonic glucose 50%	dipyrone	metoclopramide	aspirin	atorvastatin	atenolol	amlodipine	clonidine																	9
506	HSCRGS	electronic	4	dipyrone	metoclopramide	aspirin	simvastatin	tramadol	enoxaparin	Insulin human regular	hypertonic glucose 50%	risperidone	chlorpromazine	captopril	isotonic physiological solution														12
507	HSCRGS	electronic	4	ranitidine	hypertonic glucose 50%	dipyrone	metoclopramide	heparin	dexamethasone	phenytoin	Insulin human regular	morphine	isotonic physiological solution																10
508	HSCRGS	electronic	3	dipyrone	metoclopramide	heparin	esomeprazole	hypertonic glucose 50%	Insulin human regular	cefepime	isotonic physiological solution																		8
509	HSCRGS	electronic	6	ranitidine	clonidine	fentanyl	isotonic physiological solution	midazolam	scopolamine	norepinephrine	flumazenil		Ringer's lactate solution	haloperidol		glucose 5%	Insulin human regular	hypertonic glucose 50%	dipyrone	heparin	ipratropium		salbutamol	metoclopramide					18
510	HSCRGS	electronic	3	metoclopramide	dipyrone	sodium valproate	aspirin	esomeprazole	sertraline	simvastatin	hypertonic glucose 50%	hydrocortisone	Insulin human regular	acetylcysteine	heparin	amoxicillin + clavulanate	isotonic physiological solution	ipratropium	salbutamol										16
511	HSCRGS	electronic	2	dipyrone	metoclopramide	hypertonic glucose 50%	Insulin human regular	captopril	phenytoin	amitriptyline	omeprazole	simvastatin	clopidogrel	aspirin	ondansetron	ranitidine	glucose 5%	clonidine											15
512	HSCRGS	electronic	3	dipyrone	metoclopramide	heparin	haloperidol		Insulin human regular	hypertonic glucose 50%	amoxicillin + clavulanate	azithromycin																	8
513	HSCRGS	electronic	2	dipyrone	metoclopramide	Insulin human regular	hypertonic glucose 50%	ceftriaxone																					5
514	HSCRGS	electronic	2	furosemide	digoxin	carvedilol	Insulin human regular	metformin	bromazepam																				6
515	HSCRGS	electronic	3	dipyrone	metoclopramide	hypertonic glucose 50%	Insulin human regular	enoxaparin	aspirin	atorvastatin																			7
516	HSCRGS	electronic	3	metoclopramide	dipyrone	hypertonic glucose 50%	Insulin human regular	enoxaparin	aspirin	atorvastatin	enalapril	captopril																	9
517	HSCRGS	electronic	3	metoclopramide	dipyrone	levofloxacin	hypertonic glucose 50%	captopril	enoxaparin	Insulin human isophane (NPH)	Von Willebrand Factor Recombinan																		8
																													3045

## Sheet: Media_Med_Ad
Medicamentos Prescitos_Adm			MPP_Adm			pDDI_Per_Patient_Admission
MEDIA	9.31193		MEDIA	1.71254		MEDIA	6.29052
MEDIANA	9		MEDIANA	2		MEDIANA	5
SD	3.69237		SD	1.25249		SD	5.50768
MIN	2		MIN	0		MIN	0
MAX	21		MAX	6		MAX	26
MODE	10		MODE	1		MODE	1
TOTAL	3045		TOTAL	560		TOTAL	2057

## Sheet: p-DDI_Admission
Patient	Prescription	Drug-Drug Pair	Onset	Severity	Documentation	Resume
80	Electronic	DIPYRONE -- ENOXAPARIN SODIUM	Not Specified	Major	Good	Concurrent use of LOW-MOLECULAR-WEIGHT HEPARINS and NSAIDS may result in an increased risk of bleeding.
80	Electronic	DIPYRONE -- PROPRANOLOL HYDROCHLORIDE	Delayed	Moderate	Good	Concurrent use of BETA-ADRENERGIC BLOCKERS and NSAIDS may result in increased blood pressure
80	Electronic	OMEPRAZOLE -- PROPRANOLOL HYDROCHLORIDE	Not Specified	Moderate	Fair	Concurrent use of PROPRANOLOL and SELECTED CYP2C19 INHIBITORS may result in increased propranolol exposure
81	Electronic	BROMOPRIDE -- CLONAZEPAM	Not Specified	Major	Fair	Concurrent use of BROMOPRIDE and SEDATIVES may result in potentiation of sedative effects .
81	Electronic	BROMOPRIDE -- PHENOBARBITAL	Not Specified	Major	Fair	Concurrent use of BROMOPRIDE and SEDATIVES may result in potentiation of sedative effects .
81	Electronic	CLONAZEPAM -- PHENOBARBITAL	Not Specified	Major	Good	Concurrent use of BARBITURATES and BENZODIAZEPINES may result in additive respiratory depression.
81	Electronic	DEXAMETHASONE -- DIPYRONE	Not Specified	Major	Fair	Concurrent use of CORTICOSTEROIDS and NSAIDS may result in increased risk of gastrointestinal ulcer or bleeding.
81	Electronic	DIPYRONE -- ENOXAPARIN SODIUM	Not Specified	Major	Good	Concurrent use of LOW-MOLECULAR-WEIGHT HEPARINS and NSAIDS may result in an increased risk of bleeding.
81	Electronic	LAMOTRIGINE -- VALPROIC ACID	Not Specified	Major	Excellent	Concurrent use of LAMOTRIGINE and VALPROIC ACID may result in increased elimination half-life of lamotrigine leading to lamotrigine toxicity (fatigue, drowsiness, ataxia) and an increased risk of life-threatening rashes.
81	Electronic	DEXAMETHASONE -- PHENOBARBITAL	Delayed	Moderate	Good	Concurrent use of DEXAMETHASONE and PHENOBARBITAL may result in decreased dexamethasone effectiveness.
81	Electronic	LAMOTRIGINE -- PHENOBARBITAL	Not Specified	Moderate	Good	Concurrent use of PHENOBARBITAL and LAMOTRIGINE may result in reduced lamotrigine efficacy, loss of seizure control.
81	Electronic	PHENOBARBITAL -- VALPROIC ACID	Delayed	Moderate	Good	Concurrent use of PHENOBARBITAL and VALPROIC ACID may result in phenobarbital toxicity or decreased valproic acid effectiveness.
82	Electronic	None
83	Electronic	BROMOPRIDE -- QUETIAPINE FUMARATE	Not Specified	Contraindicated	Fair	Concurrent use of BROMOPRIDE and DRUGS THAT CAUSE EXTRAPYRAMIDAL REACTIONS may result in increased risk of extrapyramidal reactions.
83	Electronic	AMIODARONE HYDROCHLORIDE -- QUETIAPINE FUMARATE	Not Specified	Major	Fair	Concurrent use of QUETIAPINE and QT INTERVAL PROLONGING AGENTS may result in increased risk of QT-interval prolongation.
83	Electronic	AMIODARONE HYDROCHLORIDE -- TRAMADOL HYDROCHLORIDE	Not Specified	Major	Fair	Concurrent use of TRAMADOL and CYP3A4 INHIBITORS may result in increased tramadol exposure and increased risk of respiratory depression.
83	Electronic	ASPIRIN -- CLOPIDOGREL HYDROGEN SULFATE	Not Specified	Major	Fair	Concurrent use of ASPIRIN and CLOPIDOGREL may result in an increased risk of bleeding.
83	Electronic	ASPIRIN -- DIPYRONE	Not Specified	Major	Excellent	Concurrent use of ASPIRIN and DIPYRONE may result in reduced efficacy of aspirin.
83	Electronic	BROMOPRIDE -- TRAMADOL HYDROCHLORIDE	Not Specified	Major	Fair	Concurrent use of BROMOPRIDE and OPIOID ANALGESICS may result in potentiation of sedative effects .
83	Electronic	CLOPIDOGREL HYDROGEN SULFATE -- DIPYRONE	Not Specified	Major	Fair	Concurrent use of ANTIPLATELET AGENTS and NSAIDS may result in increased risk of bleeding.
83	Electronic	CLOPIDOGREL HYDROGEN SULFATE -- OMEPRAZOLE	Rapid	Major	Excellent	Concurrent use of CLOPIDOGREL and OMEPRAZOLE may result in reduced plasma concentrations of clopidogrel active metabolite and reduced antiplatelet activity.
83	Electronic	CLOPIDOGREL HYDROGEN SULFATE -- TRAMADOL HYDROCHLORIDE	Rapid	Major	Good	Concurrent use of CLOPIDOGREL and OPIOID AGONISTS may result in reduced efficacy of clopidogrel.
83	Electronic	QUETIAPINE FUMARATE -- TRAMADOL HYDROCHLORIDE	Not Specified	Major	Fair	Concurrent use of TRAMADOL and CNS DEPRESSANTS may result in increased risk of respiratory and CNS depression.
83	Electronic	AMIODARONE HYDROCHLORIDE -- ATORVASTATIN CALCIUM	Not Specified	Moderate	Good	Concurrent use of AMIODARONE and ATORVASTATIN may result in an increased risk of myopathy or rhabdomyolysis.
83	Electronic	ATORVASTATIN CALCIUM -- CLOPIDOGREL HYDROGEN SULFATE	Not Specified	Moderate	Excellent	Concurrent use of CLOPIDOGREL and CYP3A4 METABOLIZED STATINS may result in decreased formation of clopidogrel active metabolite resulting in high on-treatment platelet reactivity.
84	Electronic	BROMOPRIDE -- FENTANYL	Not Specified	Major	Fair	Concurrent use of BROMOPRIDE and OPIOID ANALGESICS may result in potentiation of sedative effects .
84	Electronic	BROMOPRIDE -- MIDAZOLAM HYDROCHLORIDE	Not Specified	Major	Fair	Concurrent use of BROMOPRIDE and SEDATIVES may result in potentiation of sedative effects .
84	Electronic	BROMOPRIDE -- MORPHINE SULFATE	Not Specified	Major	Fair	Concurrent use of BROMOPRIDE and OPIOID ANALGESICS may result in potentiation of sedative effects .
84	Electronic	BROMOPRIDE -- TRAMADOL HYDROCHLORIDE	Not Specified	Major	Fair	Concurrent use of BROMOPRIDE and OPIOID ANALGESICS may result in potentiation of sedative effects .
84	Electronic	DIPYRONE -- FUROSEMIDE	Not Specified	Major	Good	Concurrent use of LOOP DIURETICS and NSAIDS may result in reduced diuretic effectiveness and possible nephrotoxicity.
84	Electronic	FENTANYL -- MIDAZOLAM HYDROCHLORIDE	Not Specified	Major	Fair	Concurrent use of FENTANYL and CNS DEPRESSANTS may result in increased risk of CNS depression.
84	Electronic	FENTANYL -- MORPHINE SULFATE	Not Specified	Major	Fair	Concurrent use of MORPHINE and SEROTONERGIC CNS DEPRESSANTS may result in increased risk of respiratory and CNS depression; increased risk of serotonin syndrome.
84	Electronic	FENTANYL -- TRAMADOL HYDROCHLORIDE	Not Specified	Major	Fair	Concurrent use of FENTANYL and SEROTONERGIC CNS DEPRESSANTS may result in increased risk of respiratory and CNS depression; increased risk of serotonin syndrome.
84	Electronic	MIDAZOLAM HYDROCHLORIDE -- MORPHINE SULFATE	Not Specified	Major	Fair	Concurrent use of MORPHINE and CNS DEPRESSANTS may result in increased risk of respiratory and CNS depression.
84	Electronic	MIDAZOLAM HYDROCHLORIDE -- TRAMADOL HYDROCHLORIDE	Not Specified	Major	Fair	Concurrent use of TRAMADOL and CNS DEPRESSANTS may result in increased risk of respiratory and CNS depression.
84	Electronic	MORPHINE SULFATE -- TRAMADOL HYDROCHLORIDE	Not Specified	Major	Fair	Concurrent use of MORPHINE and SEROTONERGIC CNS DEPRESSANTS may result in increased risk of respiratory and CNS depression; increased risk of serotonin syndrome.
84	Electronic	FUROSEMIDE -- MORPHINE SULFATE	Not Specified	Moderate	Fair	Concurrent use of MORPHINE and DIURETICS may result in decreased efficacy of diuretics.
84	Electronic	MIDAZOLAM HYDROCHLORIDE -- OMEPRAZOLE	Delayed	Moderate	Fair	Concurrent use of MIDAZOLAM and OMEPRAZOLE may result in benzodiazepine toxicity (CNS depression, ataxia, lethargy).
85	Electronic	DIPYRONE -- ENOXAPARIN SODIUM	Not Specified	Major	Good	Concurrent use of LOW-MOLECULAR-WEIGHT HEPARINS and NSAIDS may result in an increased risk of bleeding.
85	Electronic	CLOBAZAM -- PHENYTOIN	Delayed	Moderate	Good	Concurrent use of CLOBAZAM and PHENYTOIN may result in an increased risk of phenytoin toxicity (ataxia, hyperreflexia, nystagmus, tremor).
85	Electronic	LAMOTRIGINE -- PHENYTOIN	Not Specified	Moderate	Fair	Concurrent use of LAMOTRIGINE and PHENYTOIN may result in reduced lamotrigine efficacy.
85	Electronic	PHENYTOIN -- SULFAMETHOXAZOLE/ TRIMETHOPRIM	Not Specified	Moderate	Good	Concurrent use of PHENYTOIN and SULFAMETHOXAZOLE may result in increased phenytoin exposure.
85	Electronic	PHENYTOIN -- SULFAMETHOXAZOLE/ TRIMETHOPRIM	Delayed	Moderate	Good	Concurrent use of PHENYTOIN and TRIMETHOPRIM may result in an increased risk of phenytoin toxicity (ataxia, hyperreflexia, nystagmus, tremors).
86	Electronic	AMLODIPINE BESYLATE -- SIMVASTATIN	Rapid	Major	Good	Concurrent use of AMLODIPINE and SIMVASTATIN may result in increased simvastatin exposure and increased risk of myopathy, including rhabdomyolysis.
86	Electronic	DIPYRONE -- HEPARIN SODIUM	Not Specified	Major	Fair	Concurrent use of ANTICOAGULANTS and NSAIDS may result in increased risk of bleeding.
87	Electronic	BROMOPRIDE -- SERTRALINE HYDROCHLORIDE	Not Specified	Contraindicated	Fair	Concurrent use of BROMOPRIDE and DRUGS THAT CAUSE EXTRAPYRAMIDAL REACTIONS may result in increased risk of extrapyramidal reactions.
87	Electronic	BROMOPRIDE -- TRAMADOL HYDROCHLORIDE	Not Specified	Major	Fair	Concurrent use of BROMOPRIDE and OPIOID ANALGESICS may result in potentiation of sedative effects .
87	Electronic	DIPYRONE -- ENOXAPARIN SODIUM	Not Specified	Major	Good	Concurrent use of LOW-MOLECULAR-WEIGHT HEPARINS and NSAIDS may result in an increased risk of bleeding.
87	Electronic	DIPYRONE -- PENTOXIFYLLINE	Not Specified	Major	Fair	Concurrent use of PENTOXIFYLLINE and NONSTEROIDAL ANTIINFLAMMATORY AGENTS may result in an increased risk of bleeding.
87	Electronic	DIPYRONE -- PREDNISONE	Not Specified	Major	Fair	Concurrent use of CORTICOSTEROIDS and NSAIDS may result in increased risk of gastrointestinal ulcer or bleeding.
87	Electronic	DIPYRONE -- SERTRALINE HYDROCHLORIDE	Not Specified	Major	Excellent	Concurrent use of NSAID and SSRI may result in an increased risk of bleeding.
87	Electronic	ENOXAPARIN SODIUM -- SERTRALINE HYDROCHLORIDE	Delayed	Major	Good	Concurrent use of SERTRALINE and ANTICOAGULANTS may result in an increased risk of bleeding.
87	Electronic	INSULIN HUMAN REGULAR -- LEVOFLOXACIN	Not Specified	Major	Fair	Concurrent use of FLUOROQUINOLONES and ANTIDIABETIC AGENTS may result in changes in blood glucose and increased risk of hypoglycemia or hyperglycemia.
87	Electronic	LEVOFLOXACIN -- SERTRALINE HYDROCHLORIDE	Not Specified	Major	Fair	Concurrent use of SERTRALINE and QT INTERVAL PROLONGING DRUGS may result in increased risk of QT-interval prolongation.
87	Electronic	LEVOFLOXACIN -- PREDNISONE	Delayed	Major	Excellent	Concurrent use of SELECTED CORTICOSTEROIDS and SELECTED FLUOROQUINOLONES may result in an increased risk of tendon rupture.
87	Electronic	PREDNISONE -- TRAMADOL HYDROCHLORIDE	Not Specified	Major	Fair	Concurrent use of TRAMADOL and CYP3A4 INDUCERS may result in reduced tramadol exposure.
87	Electronic	SERTRALINE HYDROCHLORIDE -- TRAMADOL HYDROCHLORIDE	Not Specified	Major	Fair	Concurrent use of TRAMADOL and SEROTONERGIC CYP2D6 INHIBITORS may result in increased tramadol exposure and reduced concentrations of the active metabolite.
87	Electronic	CALCIUM CARBONATE -- LEVOFLOXACIN	Rapid	Moderate	Good	Concurrent use of LEVOFLOXACIN and ALUMINUM, CALCIUM OR MAGNESIUM CONTAINING PRODUCTS may result in decreased oral levofloxacin effectiveness.
87	Electronic	CALCIUM CARBONATE -- LEVOTHYROXINE SODIUM	Rapid	Moderate	Excellent	Concurrent use of CALCIUM CARBONATE and LEVOTHYROXINE may result in decreased levothyroxine absorption.
87	Electronic	DIPYRONE -- LEVOFLOXACIN	Delayed	Moderate	Fair	Concurrent use of LEVOFLOXACIN and NONSTEROIDAL ANTIINFLAMMATORY AGENTS may result in an increased risk of seizures.
87	Electronic	INSULIN HUMAN REGULAR -- PENTOXIFYLLINE	Not Specified	Moderate	Fair	Concurrent use of PENTOXIFYLLINE and INSULINS OR PRAMLINTIDE may result in increased risk of hypoglycemia.
87	Electronic	LEVOFLOXACIN -- CALCIUM/ THIAMINE	Rapid	Moderate	Good	Concurrent use of LEVOFLOXACIN and ALUMINUM, CALCIUM OR MAGNESIUM CONTAINING PRODUCTS may result in decreased oral levofloxacin effectiveness.
87	Electronic	LEVOFLOXACIN -- CALCIUM/ CYANOCOBALAMIN	Rapid	Moderate	Good	Concurrent use of LEVOFLOXACIN and ALUMINUM, CALCIUM OR MAGNESIUM CONTAINING PRODUCTS may result in decreased oral levofloxacin effectiveness.
87	Electronic	LEVOTHYROXINE SODIUM -- OMEPRAZOLE	Not Specified	Moderate	Good	Concurrent use of LEVOTHYROXINE and PROTON PUMP INHIBITORS may result in decreased levothyroxine effectiveness.
87	Electronic	LEVOTHYROXINE SODIUM -- SERTRALINE HYDROCHLORIDE	Not Specified	Moderate	Fair	Concurrent use of LEVOTHYROXINE and SELECTIVE SEROTONIN REUPTAKE INHIBITORS may result in increased levothyroxine requirements.
87	Electronic	OMEPRAZOLE -- CALCIUM/ CYANOCOBALAMIN	Delayed	Minor	Good	Concurrent use of OMEPRAZOLE and CYANOCOBALAMIN may result in decreased cyanocobalamin absorption.
88	Electronic	AMIODARONE HYDROCHLORIDE -- METHADONE HYDROCHLORIDE	Not Specified	Major	Fair	Concurrent use of AMIODARONE and QT PROLONGING AGENTS may result in increased risk of QT prolongation and torsades de pointes.
88	Electronic	AMIODARONE HYDROCHLORIDE -- RANITIDINE HYDROCHLORIDE	Not Specified	Major	Fair	Concurrent use of AMIODARONE and RANITIDINE may result in increased amiodarone exposure.
88	Electronic	BROMOPRIDE -- METHADONE HYDROCHLORIDE	Not Specified	Major	Fair	Concurrent use of BROMOPRIDE and OPIOID ANALGESICS may result in potentiation of sedative effects .
88	Electronic	DIPYRONE -- HEPARIN SODIUM	Not Specified	Major	Fair	Concurrent use of ANTICOAGULANTS and NSAIDS may result in increased risk of bleeding.
88	Electronic	DIPYRONE -- PREDNISONE	Not Specified	Major	Fair	Concurrent use of CORTICOSTEROIDS and NSAIDS may result in increased risk of gastrointestinal ulcer or bleeding.
88	Electronic	METHADONE HYDROCHLORIDE -- PREDNISONE	Not Specified	Major	Fair	Concurrent use of METHADONE and CYP3A4 INDUCERS may result in increased risk of methadone withdrawal symptoms.
88	Electronic	METHADONE HYDROCHLORIDE -- RANITIDINE HYDROCHLORIDE	Not Specified	Major	Fair	Concurrent use of METHADONE and CYP3A4 INHIBITORS may result in increased risk of opioid adverse effects.
89	Electronic	BROMOPRIDE -- ESCITALOPRAM OXALATE	Not Specified	Contraindicated	Fair	Concurrent use of BROMOPRIDE and DRUGS THAT CAUSE EXTRAPYRAMIDAL REACTIONS may result in increased risk of extrapyramidal reactions.
89	Electronic	BROMOPRIDE -- RISPERIDONE	Not Specified	Contraindicated	Fair	Concurrent use of BROMOPRIDE and DRUGS THAT CAUSE EXTRAPYRAMIDAL REACTIONS may result in increased risk of extrapyramidal reactions.
89	Electronic	AMIODARONE HYDROCHLORIDE -- CODEINE SULFATE	Not Specified	Major	Fair	Concurrent use of CODEINE and CYP3A4 INHIBITORS may result in increased codeine and morphine concentrations.
89	Electronic	AMIODARONE HYDROCHLORIDE -- ESCITALOPRAM OXALATE	Not Specified	Major	Fair	Concurrent use of AMIODARONE and QT PROLONGING AGENTS may result in increased risk of QT prolongation and torsades de pointes.
89	Electronic	AMIODARONE HYDROCHLORIDE -- LIDOCAINE	Rapid	Major	Good	Concurrent use of AMIODARONE and LIDOCAINE may result in lidocaine toxicity (cardiac arrhythmia, seizures, coma).
89	Electronic	AMIODARONE HYDROCHLORIDE -- RISPERIDONE	Not Specified	Major	Fair	Concurrent use of AMIODARONE and QT PROLONGING AGENTS may result in increased risk of QT prolongation and torsades de pointes.
89	Electronic	AMIODARONE HYDROCHLORIDE -- TRAMADOL HYDROCHLORIDE	Not Specified	Major	Fair	Concurrent use of TRAMADOL and CYP3A4 INHIBITORS may result in increased tramadol exposure and increased risk of respiratory depression.
89	Electronic	BROMOPRIDE -- CODEINE SULFATE	Not Specified	Major	Fair	Concurrent use of BROMOPRIDE and OPIOID ANALGESICS may result in potentiation of sedative effects
89	Electronic	BROMOPRIDE -- TRAMADOL HYDROCHLORIDE	Not Specified	Major	Fair	Concurrent use of BROMOPRIDE and OPIOID ANALGESICS may result in potentiation of sedative effects
89	Electronic	CLOPIDOGREL HYDROGEN SULFATE -- CODEINE SULFATE	Rapid	Major	Good	Concurrent use of CLOPIDOGREL and OPIOID AGONISTS may result in reduced efficacy of clopidogrel.
89	Electronic	CLOPIDOGREL HYDROGEN SULFATE -- DIPYRONE	Not Specified	Major	Fair	Concurrent use of ANTIPLATELET AGENTS and NSAIDS may result in increased risk of bleeding.
89	Electronic	CLOPIDOGREL HYDROGEN SULFATE -- ENOXAPARIN SODIUM	Not Specified	Major	Fair	Concurrent use of ANTIPLATELETS and LOW MOLECULAR WEIGHT HEPARIN may result in increased risk of bleeding.
89	Electronic	CLOPIDOGREL HYDROGEN SULFATE -- ESCITALOPRAM OXALATE	Not Specified	Major	Good	Concurrent use of ESCITALOPRAM and ANTIPLATELET AGENTS may result in increased risk of bleeding.
89	Electronic	CLOPIDOGREL HYDROGEN SULFATE -- OMEPRAZOLE	Rapid	Major	Excellent	Concurrent use of CLOPIDOGREL and OMEPRAZOLE may result in reduced plasma concentrations of clopidogrel active metabolite and reduced antiplatelet activity.
89	Electronic	CLOPIDOGREL HYDROGEN SULFATE -- TRAMADOL HYDROCHLORIDE	Rapid	Major	Good	Concurrent use of CLOPIDOGREL and OPIOID AGONISTS may result in reduced efficacy of clopidogrel.
89	Electronic	CODEINE SULFATE -- ESCITALOPRAM OXALATE	Not Specified	Major	Fair	Concurrent use of CODEINE and SEROTONERGIC AGENTS may result in increased risk of serotonin syndrome.
89	Electronic	CODEINE SULFATE -- TRAMADOL HYDROCHLORIDE	Not Specified	Major	Fair	Concurrent use of CODEINE and SEROTONERGIC CNS DEPRESSANTS may result in increased risk of respiratory and CNS depression; increased risk of serotonin syndrome.
89	Electronic	DIPYRONE -- ENOXAPARIN SODIUM	Not Specified	Major	Good	Concurrent use of LOW-MOLECULAR-WEIGHT HEPARINS and NSAIDS may result in an increased risk of bleeding.
89	Electronic	DIPYRONE -- ESCITALOPRAM OXALATE	Not Specified	Major	Excellent	Concurrent use of NSAID and SSRI may result in an increased risk of bleeding.
89	Electronic	DIPYRONE -- METHYLPREDNISOLONE	Not Specified	Major	Fair	Concurrent use of CORTICOSTEROIDS and NSAIDS may result in increased risk of gastrointestinal ulcer or bleeding.
89	Electronic	ENOXAPARIN SODIUM -- ESCITALOPRAM OXALATE	Not Specified	Major	Good	Concurrent use of ESCITALOPRAM and ANTICOAGULANTS may result in an increased risk of bleeding.
89	Electronic	ESCITALOPRAM OXALATE -- OMEPRAZOLE	Not Specified	Major	Fair	Concurrent use of ESCITALOPRAM and CYP2C19 INHIBITORS may result in increased escitalopram exposure.
89	Electronic	ESCITALOPRAM OXALATE -- RISPERIDONE	Not Specified	Major	Fair	Concurrent use of ESCITALOPRAM and QT INTERVAL-PROLONGING DRUGS may result in increased risk of QT-interval prolongation.
89	Electronic	ESCITALOPRAM OXALATE -- TRAMADOL HYDROCHLORIDE	Not Specified	Major	Fair	Concurrent use of TRAMADOL and SEROTONERGIC AGENTS may result in increased risk of serotonin syndrome.
89	Electronic	AMIODARONE HYDROCHLORIDE -- ATORVASTATIN CALCIUM	Not Specified	Moderate	Good	Concurrent use of AMIODARONE and ATORVASTATIN may result in an increased risk of myopathy or rhabdomyolysis.
89	Electronic	ATORVASTATIN CALCIUM -- CLOPIDOGREL HYDROGEN SULFATE	Not Specified	Moderate	Excellent	Concurrent use of CLOPIDOGREL and CYP3A4 METABOLIZED STATINS may result in decreased formation of clopidogrel active metabolite resulting in high on-treatment platelet reactivity.
90	Electronic	AMITRIPTYLINE HYDROCHLORIDE -- BROMOPRIDE	Not Specified	Contraindicated	Fair	Concurrent use of BROMOPRIDE and DRUGS THAT CAUSE EXTRAPYRAMIDAL REACTIONS may result in increased risk of extrapyramidal reactions.
90	Electronic	AMITRIPTYLINE HYDROCHLORIDE -- DIPYRONE	Not Specified	Major	Excellent	Concurrent use of NSAID and TRICYCLIC ANTIDEPRESSANTS may result in an increased risk of bleeding.
90	Electronic	AMITRIPTYLINE HYDROCHLORIDE -- TRAMADOL HYDROCHLORIDE	Not Specified	Major	Fair	Concurrent use of TRAMADOL and SEROTONERGIC AGENTS WITH ANTICHOLINERGIC PROPERTIES may result in increased risk of paralytic ileus; increased risk of serotonin syndrome.
90	Electronic	BROMOPRIDE -- TRAMADOL HYDROCHLORIDE	Not Specified	Major	Fair	Concurrent use of BROMOPRIDE and OPIOID ANALGESICS may result in potentiation of sedative effects
90	Electronic	DIPYRONE -- ENOXAPARIN SODIUM	Not Specified	Major	Good	Concurrent use of LOW-MOLECULAR-WEIGHT HEPARINS and NSAIDS may result in an increased risk of bleeding.
90	Electronic	PHENYTOIN -- TRAMADOL HYDROCHLORIDE	Not Specified	Major	Fair	Concurrent use of TRAMADOL and CYP3A4 INDUCERS may result in reduced tramadol exposure.
90	Electronic	TRAMADOL HYDROCHLORIDE -- RANITIDINE HYDROCHLORIDE	Not Specified	Major	Fair	Concurrent use of TRAMADOL and CYP3A4 INHIBITORS may result in increased tramadol exposure and increased risk of respiratory depression.
90	Electronic	AMITRIPTYLINE HYDROCHLORIDE -- PHENYTOIN	Delayed	Moderate	Good	Concurrent use of AMITRIPTYLINE and PHENYTOIN may result in an increased risk of phenytoin toxicity (ataxia, hyperreflexia, nystagmus, tremor).
90	Electronic	PHENYTOIN -- RANITIDINE HYDROCHLORIDE	Delayed	Minor	Good	Concurrent use of PHENYTOIN and RANITIDINE may result in increased phenytoin concentrations.
91	Electronic	BROMOPRIDE -- MORPHINE SULFATE	Not Specified	Major	Fair	Concurrent use of BROMOPRIDE and OPIOID ANALGESICS may result in potentiation of sedative effects
91	Electronic	BROMOPRIDE -- TRAMADOL HYDROCHLORIDE	Not Specified	Major	Fair	Concurrent use of BROMOPRIDE and OPIOID ANALGESICS may result in potentiation of sedative effects
91	Electronic	DIPYRONE -- FUROSEMIDE	Not Specified	Major	Good	Concurrent use of LOOP DIURETICS and NSAIDS may result in reduced diuretic effectiveness and possible nephrotoxicity.
91	Electronic	DIPYRONE -- HEPARIN SODIUM	Not Specified	Major	Fair	Concurrent use of ANTICOAGULANTS and NSAIDS may result in increased risk of bleeding.
91	Electronic	MORPHINE SULFATE -- ONDANSETRON	Not Specified	Major	Fair	Concurrent use of MORPHINE and SEROTONERGIC AGENTS may result in increased risk of serotonin syndrome.
91	Electronic	MORPHINE SULFATE -- TRAMADOL HYDROCHLORIDE	Not Specified	Major	Fair	Concurrent use of MORPHINE and SEROTONERGIC CNS DEPRESSANTS may result in increased risk of respiratory and CNS depression; increased risk of serotonin syndrome.
91	Electronic	ONDANSETRON -- TRAMADOL HYDROCHLORIDE	Not Specified	Major	Fair	Concurrent use of TRAMADOL and SEROTONERGIC AGENTS may result in increased risk of serotonin syndrome.
91	Electronic	ALBUTEROL -- FUROSEMIDE	Not Specified	Moderate	Fair	Concurrent use of ALBUTEROL and POTASSIUM-DEPLETING DIURETICS may result in ECG changes or hypokalemia.
91	Electronic	FUROSEMIDE -- MORPHINE SULFATE	Not Specified	Moderate	Fair	Concurrent use of MORPHINE and DIURETICS may result in decreased efficacy of diuretics.
92	Electronic	INSULIN HUMAN REGULAR -- METOCLOPRAMIDE HYDROCHLORIDE	Not Specified	Major	Fair	Concurrent use of METOCLOPRAMIDE and INSULINS may result in risk of hyperglycemia.
92	Electronic	METOCLOPRAMIDE HYDROCHLORIDE -- MORPHINE SULFATE	Not Specified	Major	Fair	Concurrent use of METOCLOPRAMIDE and CNS DEPRESSANTS may result in increased risk of CNS depression.
92	Electronic	MORPHINE SULFATE -- ONDANSETRON	Not Specified	Major	Fair	Concurrent use of MORPHINE and SEROTONERGIC AGENTS may result in increased risk of serotonin syndrome.
93	Electronic	AMLODIPINE BESYLATE -- SIMVASTATIN	Rapid	Major	Good	Concurrent use of AMLODIPINE and SIMVASTATIN may result in increased simvastatin exposure and increased risk of myopathy, including rhabdomyolysis.
93	Electronic	BROMOPRIDE -- DIAZEPAM	Not Specified	Major	Fair	Concurrent use of BROMOPRIDE and SEDATIVES may result in potentiation of sedative effects .
93	Electronic	DIPYRONE -- FUROSEMIDE	Not Specified	Major	Good	Concurrent use of LOOP DIURETICS and NSAIDS may result in reduced diuretic effectiveness and possible nephrotoxicity.
93	Electronic	DIPYRONE -- HEPARIN SODIUM	Not Specified	Major	Fair	Concurrent use of ANTICOAGULANTS and NSAIDS may result in increased risk of bleeding.
94	Electronic	DEXAMETHASONE -- DIPYRONE	Not Specified	Major	Fair	Concurrent use of CORTICOSTEROIDS and NSAIDS may result in increased risk of gastrointestinal ulcer or bleeding.
94	Electronic	DIPYRONE -- FUROSEMIDE	Not Specified	Major	Good	Concurrent use of LOOP DIURETICS and NSAIDS may result in reduced diuretic effectiveness and possible nephrotoxicity.
94	Electronic	HALOPERIDOL -- MORPHINE SULFATE	Not Specified	Major	Fair	Concurrent use of MORPHINE and CNS DEPRESSANTS may result in increased risk of respiratory and CNS depression.
94	Electronic	HALOPERIDOL -- ONDANSETRON	Not Specified	Major	Fair	Concurrent use of HALOPERIDOL and ONDANSETRON may result in an increased risk of QT interval prolongation.
94	Electronic	MORPHINE SULFATE -- ONDANSETRON	Not Specified	Major	Fair	Concurrent use of MORPHINE and SEROTONERGIC AGENTS may result in increased risk of serotonin syndrome.
94	Electronic	ALBUTEROL -- FUROSEMIDE	Not Specified	Moderate	Fair	Concurrent use of ALBUTEROL and POTASSIUM-DEPLETING DIURETICS may result in ECG changes or hypokalemia.
94	Electronic	FUROSEMIDE -- MORPHINE SULFATE	Not Specified	Moderate	Fair	Concurrent use of MORPHINE and DIURETICS may result in decreased efficacy of diuretics.
95	Electronic	None
96	Electronic	BROMOPRIDE -- TRAMADOL HYDROCHLORIDE	Not Specified	Major	Fair	Concurrent use of BROMOPRIDE and OPIOID ANALGESICS may result in potentiation of sedative effects
96	Electronic	DIPYRONE -- FUROSEMIDE	Not Specified	Major	Good	Concurrent use of LOOP DIURETICS and NSAIDS may result in reduced diuretic effectiveness and possible nephrotoxicity.
96	Electronic	METRONIDAZOLE -- ONDANSETRON	Not Specified	Major	Fair	Concurrent use of METRONIDAZOLE and QT INTERVAL PROLONGING DRUGS may result in increased risk of QT-interval prolongation and arrhythmias.
96	Electronic	ONDANSETRON -- TRAMADOL HYDROCHLORIDE	Not Specified	Major	Fair	Concurrent use of TRAMADOL and SEROTONERGIC AGENTS may result in increased risk of serotonin syndrome.
96	Electronic	DIPYRONE -- LOSARTAN POTASSIUM	Not Specified	Moderate	Excellent	Concurrent use of ACE INHIBITORS AND ANGIOTENSIN RECEPTOR BLOCKERS and NSAIDS may result in renal dysfunction and/ or increased blood pressure.
97	Electronic	DIPYRONE -- ENOXAPARIN SODIUM	Not Specified	Major	Good	Concurrent use of LOW-MOLECULAR-WEIGHT HEPARINS and NSAIDS may result in an increased risk of bleeding.
97	Electronic	BISOPROLOL FUMARATE -- DIPYRONE	Delayed	Moderate	Good	Concurrent use of BETA-ADRENERGIC BLOCKERS and NSAIDS may result in increased blood pressure.
97	Electronic	DIPYRONE -- LOSARTAN POTASSIUM	Not Specified	Moderate	Excellent	Concurrent use of ACE INHIBITORS AND ANGIOTENSIN RECEPTOR BLOCKERS and NSAIDS may result in renal dysfunction and/ or increased blood pressure.
98	Electronic	CIPROFLOXACIN -- INSULIN HUMAN REGULAR	Not Specified	Major	Fair	Concurrent use of FLUOROQUINOLONES and ANTIDIABETIC AGENTS may result in changes in blood glucose and increased risk of hypoglycemia or hyperglycemia.
98	Electronic	CIPROFLOXACIN -- ONDANSETRON	Not Specified	Major	Fair	Concurrent use of CIPROFLOXACIN and ONDANSETRON may result in an increased risk of QT interval prolongation.
98	Electronic	DIPYRONE -- HEPARIN SODIUM	Not Specified	Major	Fair	Concurrent use of ANTICOAGULANTS and NSAIDS may result in increased risk of bleeding.
98	Electronic	INSULIN HUMAN REGULAR -- METOCLOPRAMIDE HYDROCHLORIDE	Not Specified	Major	Fair	Concurrent use of METOCLOPRAMIDE and INSULINS may result in risk of hyperglycemia.
98	Electronic	CIPROFLOXACIN -- LEVOTHYROXINE SODIUM	Rapid	Moderate	Good	Concurrent use of CIPROFLOXACIN and LEVOTHYROXINE may result in decreased efficacy of levothyroxine.
98	Electronic	HEPARIN SODIUM -- VITAMIN A	Delayed	Moderate	Good	Concurrent use of VITAMIN A and ANTICOAGULANTS may result in increased risk of bleeding.
98	Electronic	LEVOTHYROXINE SODIUM -- OMEPRAZOLE	Not Specified	Moderate	Good	Concurrent use of LEVOTHYROXINE and PROTON PUMP INHIBITORS may result in decreased levothyroxine effectiveness.
99	Electronic	MEPERIDINE HYDROCHLORIDE -- MIDAZOLAM HYDROCHLORIDE	Not Specified	Major	Fair	Concurrent use of MEPERIDINE and SEDATIVES may result in increased risk of respiratory or CNS depression.
100	Electronic	None
101	Electronic	BROMOPRIDE -- TRAMADOL HYDROCHLORIDE	Not Specified	Major	Fair	Concurrent use of BROMOPRIDE and OPIOID ANALGESICS may result in potentiation of sedative effects
101	Electronic	DEXAMETHASONE -- DIPYRONE	Not Specified	Major	Fair	Concurrent use of CORTICOSTEROIDS and NSAIDS may result in increased risk of gastrointestinal ulcer or bleeding.
101	Electronic	DEXAMETHASONE -- TRAMADOL HYDROCHLORIDE	Not Specified	Major	Fair	Concurrent use of TRAMADOL and CYP3A4 INDUCERS may result in reduced tramadol exposure.
101	Electronic	ONDANSETRON -- TRAMADOL HYDROCHLORIDE	Not Specified	Major	Fair	Concurrent use of TRAMADOL and SEROTONERGIC AGENTS may result in increased risk of serotonin syndrome.
102	Electronic	AMLODIPINE BESYLATE -- CLOPIDOGREL HYDROGEN SULFATE	Not Specified	Major	Excellent	Concurrent use of AMLODIPINE and CLOPIDOGREL may result in decreased antiplatelet effect and increased risk of thrombotic events.
102	Electronic	ASPIRIN -- CLOPIDOGREL HYDROGEN SULFATE	Not Specified	Major	Fair	Concurrent use of ASPIRIN and CLOPIDOGREL may result in an increased risk of bleeding
102	Electronic	ASPIRIN -- DIPYRONE	Not Specified	Major	Excellent	Concurrent use of ASPIRIN and DIPYRONE may result in reduced efficacy of aspirin.
102	Electronic	ASPIRIN -- HEPARIN SODIUM	Not Specified	Major	Fair	Concurrent use of ANTICOAGULANTS and ANTIPLATELET AGENTS may result in increased risk of bleeding
102	Electronic	ASPIRIN -- HYDROCHLOROTHIAZIDE	Delayed	Major	Good	Concurrent use of NSAIDS and THIAZIDE DIURETICS may result in reduced diuretic effectiveness and possible nephrotoxicity.
102	Electronic	CLOPIDOGREL HYDROGEN SULFATE -- DIPYRONE	Not Specified	Major	Fair	Concurrent use of ANTIPLATELET AGENTS and NSAIDS may result in increased risk of bleeding.
102	Electronic	CLOPIDOGREL HYDROGEN SULFATE -- HEPARIN SODIUM	Not Specified	Major	Fair	Concurrent use of ANTICOAGULANTS and ANTIPLATELET AGENTS may result in increased risk of bleeding.
102	Electronic	CLOPIDOGREL HYDROGEN SULFATE -- OMEPRAZOLE	Rapid	Major	Excellent	Concurrent use of CLOPIDOGREL and OMEPRAZOLE may result in reduced plasma concentrations of clopidogrel active metabolite and reduced antiplatelet activity.
102	Electronic	DIPYRONE -- HEPARIN SODIUM	Not Specified	Major	Fair	Concurrent use of ANTICOAGULANTS and NSAIDS may result in increased risk of bleeding.
102	Electronic	DIPYRONE -- HYDROCHLOROTHIAZIDE	Delayed	Major	Good	Concurrent use of NSAIDS and THIAZIDE DIURETICS may result in reduced diuretic effectiveness and possible nephrotoxicity.
102	Electronic	ASPIRIN -- ATENOLOL	Delayed	Moderate	Good	Concurrent use of BETA-ADRENERGIC BLOCKERS and NSAIDS may result in increased blood pressure.
102	Electronic	ATENOLOL -- DIPYRONE	Delayed	Moderate	Good	Concurrent use of BETA-ADRENERGIC BLOCKERS and NSAIDS may result in increased blood pressure.
102	Electronic	ATORVASTATIN CALCIUM -- CLOPIDOGREL HYDROGEN SULFATE	Not Specified	Moderate	Excellent	Concurrent use of CLOPIDOGREL and CYP3A4 METABOLIZED STATINS may result in decreased formation of clopidogrel active metabolite resulting in high on-treatment platelet reactivity.
102	Electronic	DIPYRONE -- LOSARTAN POTASSIUM	Not Specified	Moderate	Excellent	Concurrent use of ACE INHIBITORS AND ANGIOTENSIN RECEPTOR BLOCKERS and NSAIDS may result in renal dysfunction and/ or increased blood pressure.
103	Electronic	DEXAMETHASONE -- DIPYRONE	Not Specified	Major	Fair	Concurrent use of CORTICOSTEROIDS and NSAIDS may result in increased risk of gastrointestinal ulcer or bleeding
103	Electronic	DIPYRONE -- HEPARIN SODIUM	Not Specified	Major	Fair	Concurrent use of ANTICOAGULANTS and NSAIDS may result in increased risk of bleeding.
103	Electronic	CALCIUM CARBONATE -- LEVOTHYROXINE SODIUM	Rapid	Moderate	Excellent	Concurrent use of CALCIUM CARBONATE and LEVOTHYROXINE may result in decreased levothyroxine absorption.
104	Electronic	AMITRIPTYLINE HYDROCHLORIDE -- BROMOPRIDE	Not Specified	Contraindicated	Fair	Concurrent use of BROMOPRIDE and DRUGS THAT CAUSE EXTRAPYRAMIDAL REACTIONS may result in increased risk of extrapyramidal reactions.
104	Electronic	AMITRIPTYLINE HYDROCHLORIDE -- DIPYRONE	Not Specified	Major	Excellent	Concurrent use of NSAID and TRICYCLIC ANTIDEPRESSANTS may result in an increased risk of bleeding.
104	Electronic	DIPYRONE -- ENOXAPARIN SODIUM	Not Specified	Major	Good	Concurrent use of LOW-MOLECULAR-WEIGHT HEPARINS and NSAIDS may result in an increased risk of bleeding.
105	Electronic	BROMOPRIDE -- QUETIAPINE FUMARATE	Not Specified	Contraindicated	Fair	Concurrent use of BROMOPRIDE and DRUGS THAT CAUSE EXTRAPYRAMIDAL REACTIONS may result in increased risk of extrapyramidal reactions.
105	Electronic	BROMOPRIDE -- PHENOBARBITAL	Not Specified	Major	Fair	Concurrent use of BROMOPRIDE and SEDATIVES may result in potentiation of sedative effects .
105	Electronic	DIPYRONE -- FUROSEMIDE	Not Specified	Major	Good	Concurrent use of BROMOPRIDE and SEDATIVES may result in potentiation of sedative effects .
105	Electronic	DIPYRONE -- HEPARIN SODIUM	Not Specified	Major	Fair	Concurrent use of ANTICOAGULANTS and NSAIDS may result in increased risk of bleeding.
105	Electronic	DIPYRONE -- ENALAPRIL MALEATE	Not Specified	Moderate	Excellent	Concurrent use of ACE INHIBITORS AND ANGIOTENSIN RECEPTOR BLOCKERS and NSAIDS may result in renal dysfunction and/ or increased blood pressure.
105	Electronic	ENALAPRIL MALEATE -- FUROSEMIDE	Rapid	Moderate	Good	Concurrent use of ANGIOTENSIN CONVERTING ENZYME INHIBITORS and LOOP DIURETICS may result in postural hypotension (first dose).
106	Electronic	METOCLOPRAMIDE HYDROCHLORIDE -- MORPHINE SULFATE	Not Specified	Major	Fair	Concurrent use of METOCLOPRAMIDE and CNS DEPRESSANTS may result in increased risk of CNS depression.
106	Electronic	MORPHINE SULFATE -- ONDANSETRON	Not Specified	Major	Fair	Concurrent use of MORPHINE and SEROTONERGIC AGENTS may result in increased risk of serotonin syndrome.
107	Electronic	DIPYRONE -- FUROSEMIDE	Not Specified	Major	Good	Concurrent use of LOOP DIURETICS and NSAIDS may result in reduced diuretic effectiveness and possible nephrotoxicity.
107	Electronic	FENTANYL -- MIDAZOLAM HYDROCHLORIDE	Not Specified	Major	Fair	Concurrent use of FENTANYL and CNS DEPRESSANTS may result in increased risk of CNS depression.
107	Electronic	FENTANYL -- ONDANSETRON	Delayed	Major	Fair	Concurrent use of FENTANYL and SEROTONERGIC AGENTS may result in increased risk of serotonin syndrome
107	Electronic	MIDAZOLAM HYDROCHLORIDE -- OMEPRAZOLE	Delayed	Moderate	Fair	Concurrent use of MIDAZOLAM and OMEPRAZOLE may result in benzodiazepine toxicity (CNS depression, ataxia, lethargy).
108	Electronic	AMITRIPTYLINE HYDROCHLORIDE -- BROMOPRIDE	Not Specified	Contraindicated	Fair	Concurrent use of BROMOPRIDE and DRUGS THAT CAUSE EXTRAPYRAMIDAL REACTIONS may result in increased risk of extrapyramidal reactions.
108	Electronic	BROMOPRIDE -- CHLORPROMAZINE	Not Specified	Contraindicated	Fair	Concurrent use of BROMOPRIDE and DRUGS THAT CAUSE EXTRAPYRAMIDAL REACTIONS may result in increased risk of extrapyramidal reactions.
108	Electronic	BROMOPRIDE -- HALOPERIDOL	Not Specified	Contraindicated	Fair	Concurrent use of BROMOPRIDE and DRUGS THAT CAUSE EXTRAPYRAMIDAL REACTIONS may result in increased risk of extrapyramidal reactions.
108	Electronic	AMITRIPTYLINE HYDROCHLORIDE -- CHLORPROMAZINE	Not Specified	Major	Fair	Concurrent use of AMITRIPTYLINE and CHLORPROMAZINE may result in an increased risk of QT interval prolongation.
108	Electronic	AMITRIPTYLINE HYDROCHLORIDE -- DIPYRONE	Not Specified	Major	Excellent	Concurrent use of NSAID and TRICYCLIC ANTIDEPRESSANTS may result in an increased risk of bleeding.
108	Electronic	AMITRIPTYLINE HYDROCHLORIDE -- HALOPERIDOL	Not Specified	Major	Fair	Concurrent use of TRICYCLIC ANTIDEPRESSANTS and ANTIPSYCHOTICS may result in an increased risk of cardiotoxicity (QT prolongation, torsades de pointes, cardiac arrest).
108	Electronic	AMITRIPTYLINE HYDROCHLORIDE -- MORPHINE SULFATE	Not Specified	Major	Fair	Concurrent use of MORPHINE and SEROTONERGIC AGENTS WITH ANTICHOLINERGIC PROPERTIES may result in increased risk of paralytic ileus; increased risk of serotonin syndrome.
108	Electronic	AMITRIPTYLINE HYDROCHLORIDE -- ONDANSETRON	Not Specified	Major	Fair	Concurrent use of AMITRIPTYLINE and ONDANSETRON may result in an increased risk of QT interval prolongation.
108	Electronic	BROMOPRIDE -- DIAZEPAM	Not Specified	Major	Fair	Concurrent use of BROMOPRIDE and SEDATIVES may result in potentiation of sedative effects .
108	Electronic	BROMOPRIDE -- MORPHINE SULFATE	Not Specified	Major	Fair	Concurrent use of BROMOPRIDE and OPIOID ANALGESICS may result in potentiation of sedative effects
108	Electronic	CHLORPROMAZINE -- HALOPERIDOL	Not Specified	Major	Fair	Concurrent use of ANTIPSYCHOTICS and PHENOTHIAZINES may result in an increased risk of cardiotoxicity (QT prolongation, torsades de pointes, cardiac arrest).
108	Electronic	CHLORPROMAZINE -- MORPHINE SULFATE	Not Specified	Major	Fair	Concurrent use of MORPHINE and ANTICHOLINERGIC CNS DEPRESSANTS may result in increased risk of paralytic ileus; increased risk of respiratory and CNS depression.
108	Electronic	CHLORPROMAZINE -- ONDANSETRON	Not Specified	Major	Fair	Concurrent use of CHLORPROMAZINE and ONDANSETRON may result in an increased risk of QT interval prolongation.
108	Electronic	DIAZEPAM -- MORPHINE SULFATE	Not Specified	Major	Fair	Concurrent use of MORPHINE and CNS DEPRESSANTS may result in increased risk of respiratory and CNS depression.
108	Electronic	HALOPERIDOL -- MORPHINE SULFATE	Not Specified	Major	Fair	Concurrent use of MORPHINE and CNS DEPRESSANTS may result in increased risk of respiratory and CNS depression
108	Electronic	HALOPERIDOL -- ONDANSETRON	Not Specified	Major	Fair	Concurrent use of HALOPERIDOL and ONDANSETRON may result in an increased risk of QT interval prolongation.
108	Electronic	MORPHINE SULFATE -- ONDANSETRON	Not Specified	Major	Fair	Concurrent use of MORPHINE and SEROTONERGIC AGENTS may result in increased risk of serotonin syndrome.
108	Electronic	AMITRIPTYLINE HYDROCHLORIDE -- DIAZEPAM	Rapid	Moderate	Good	Concurrent use of AMITRIPTYLINE and DIAZEPAM may result in psychomotor deficits (decreased reaction time, decreased vigilance).
108	Electronic	DIAZEPAM -- OMEPRAZOLE	Delayed	Minor	Good	Concurrent use of OMEPRAZOLE and DIAZEPAM may result in enhanced and prolonged diazepam effects.
109	Electronic	AMLODIPINE BESYLATE -- DOMPERIDONE	Not Specified	Major	Fair	Concurrent use of AMLODIPINE and DOMPERIDONE may result in increased domperidone exposure and an increased risk of QT prolongation.
109	Electronic	BROMOPRIDE -- MEPERIDINE HYDROCHLORIDE	Not Specified	Major	Fair	Concurrent use of BROMOPRIDE and OPIOID ANALGESICS may result in potentiation of sedative effects
109	Electronic	BROMOPRIDE -- MIDAZOLAM HYDROCHLORIDE	Not Specified	Major	Fair	Concurrent use of BROMOPRIDE and SEDATIVES may result in potentiation of sedative effects
109	Electronic	DIPYRONE -- HEPARIN SODIUM	Not Specified	Major	Fair	Concurrent use of ANTICOAGULANTS and NSAIDS may result in increased risk of bleeding.
109	Electronic	DOMPERIDONE -- ONDANSETRON	Not Specified	Major	Fair	Concurrent use of DOMPERIDONE and ONDANSETRON may result in increased risk of QT interval prolongation.
109	Electronic	INSULIN HUMAN REGULAR -- METOCLOPRAMIDE HYDROCHLORIDE	Not Specified	Major	Fair	Concurrent use of METOCLOPRAMIDE and INSULINS may result in risk of hyperglycemia.
109	Electronic	MEPERIDINE HYDROCHLORIDE -- MIDAZOLAM HYDROCHLORIDE	Not Specified	Major	Fair	Concurrent use of MEPERIDINE and SEDATIVES may result in increased risk of respiratory or CNS depression.
109	Electronic	MEPERIDINE HYDROCHLORIDE -- ONDANSETRON	Not Specified	Major	Fair	Concurrent use of MEPERIDINE and SEROTONERGIC AGENTS may result in increased risk of serotonin syndrome.
109	Electronic	METOCLOPRAMIDE HYDROCHLORIDE -- MIDAZOLAM HYDROCHLORIDE	Not Specified	Major	Fair	Concurrent use of METOCLOPRAMIDE and CNS DEPRESSANTS may result in increased risk of CNS depression.
109	Electronic	DIPYRONE -- PROPRANOLOL HYDROCHLORIDE	Delayed	Moderate	Good	Concurrent use of BETA-ADRENERGIC BLOCKERS and NSAIDS may result in increased blood pressure.
109	Electronic	INSULIN HUMAN REGULAR -- PROPRANOLOL HYDROCHLORIDE	Delayed	Moderate	Good	Concurrent use of ANTIDIABETIC AGENTS and BETA-ADRENERGIC BLOCKERS may result in hypoglycemia or hyperglycemia; decreased symptoms of hypoglycemia.
109	Electronic	MIDAZOLAM HYDROCHLORIDE -- OMEPRAZOLE	Delayed	Moderate	Fair	Concurrent use of MIDAZOLAM and OMEPRAZOLE may result in benzodiazepine toxicity (CNS depression, ataxia, lethargy).
109	Electronic	OMEPRAZOLE -- PROPRANOLOL HYDROCHLORIDE	Not Specified	Moderate	Fair	Concurrent use of PROPRANOLOL and SELECTED CYP2C19 INHIBITORS may result in increased propranolol exposure.
110	Electronic	DIPYRONE -- ENOXAPARIN SODIUM	Not Specified	Major	Good	Concurrent use of LOW-MOLECULAR-WEIGHT HEPARINS and NSAIDS may result in an increased risk of bleeding.
111	Electronic	None
112	Electronic	FLUCONAZOLE -- ONDANSETRON	Not Specified	Contraindicated	Fair	Concurrent use of FLUCONAZOLE and ONDANSETRON may result in an increased risk of QT interval prolongation
112	Electronic	DEXAMETHASONE -- DIPYRONE	Not Specified	Major	Fair	Concurrent use of CORTICOSTEROIDS and NSAIDS may result in increased risk of gastrointestinal ulcer or bleeding
112	Electronic	DEXAMETHASONE -- FENTANYL	Not Specified	Major	Excellent	Concurrent use of FENTANYL and CYP3A4 INDUCERS may result in decreased plasma concentrations of fentanyl
112	Electronic	DIPYRONE -- HEPARIN SODIUM	Not Specified	Major	Fair	Concurrent use of ANTICOAGULANTS and NSAIDS may result in increased risk of bleeding.
112	Electronic	FENTANYL -- FLUCONAZOLE	Not Specified	Major	Excellent	Concurrent use of FENTANYL and CYP3A4 INHIBITORS may result in increased risk of fentanyl toxicity.
112	Electronic	FENTANYL -- MIDAZOLAM HYDROCHLORIDE	Not Specified	Major	Fair	Concurrent use of FENTANYL and CNS DEPRESSANTS may result in increased risk of CNS depression.
112	Electronic	FENTANYL -- ONDANSETRON	Delayed	Major	Fair	Concurrent use of FENTANYL and SEROTONERGIC AGENTS may result in increased risk of serotonin syndrome.
112	Electronic	AMPHOTERICIN B LIPOSOME -- DEXAMETHASONE	Not Specified	Moderate	Fair	Concurrent use of AMPHOTERICIN B LIPOSOME and CORTICOSTEROIDS may result in an increased risk of hypokalemia.
112	Electronic	DEXAMETHASONE -- FLUCONAZOLE	Not Specified	Moderate	Fair	Concurrent use of FLUCONAZOLE and SELECTED GLUCOCORTICOIDS may result in increased glucocorticoid exposure and risk for toxicity.
112	Electronic	FLUCONAZOLE -- MIDAZOLAM HYDROCHLORIDE	Rapid	Moderate	Excellent	Concurrent use of FLUCONAZOLE and MIDAZOLAM may result in increased midazolam concentrations and potential midazolam toxicity (excessive sedation and prolonged hypnotic effects).
112	Electronic	FLUCONAZOLE -- OMEPRAZOLE	Rapid	Moderate	Excellent	Concurrent use of FLUCONAZOLE and OMEPRAZOLE may result in increased plasma concentrations of omeprazole.
112	Electronic	MIDAZOLAM HYDROCHLORIDE -- OMEPRAZOLE	Delayed	Moderate	Fair	Concurrent use of MIDAZOLAM and OMEPRAZOLE may result in benzodiazepine toxicity (CNS depression, ataxia, lethargy).
113	Electronic	ASPIRIN -- DIPYRONE	Not Specified	Major	Excellent	Concurrent use of ASPIRIN and DIPYRONE may result in reduced efficacy of aspirin.
113	Electronic	ASPIRIN -- FUROSEMIDE	Not Specified	Major	Good	Concurrent use of LOOP DIURETICS and NSAIDS may result in reduced diuretic effectiveness and possible nephrotoxicity.
113	Electronic	ATENOLOL -- CLONIDINE	Not Specified	Major	Fair	Concurrent use of ATENOLOL and CLONIDINE may result in increased risk of sinus bradycardia; exaggerated clonidine withdrawal response (acute hypertension)
113	Electronic	DIPYRONE -- ENOXAPARIN SODIUM	Not Specified	Major	Good	Concurrent use of LOW-MOLECULAR-WEIGHT HEPARINS and NSAIDS may result in an increased risk of bleeding.
113	Electronic	DIPYRONE -- FUROSEMIDE	Not Specified	Major	Good	Concurrent use of LOOP DIURETICS and NSAIDS may result in reduced diuretic effectiveness and possible nephrotoxicity.
113	Electronic	ASPIRIN -- ATENOLOL	Delayed	Moderate	Good	Concurrent use of BETA-ADRENERGIC BLOCKERS and NSAIDS may result in increased blood pressure.
113	Electronic	ATENOLOL -- DIPYRONE	Delayed	Moderate	Good	Concurrent use of BETA-ADRENERGIC BLOCKERS and NSAIDS may result in increased blood pressure.
114	Electronic	BROMOPRIDE -- MORPHINE SULFATE	Not Specified	Major	Fair	Concurrent use of BROMOPRIDE and OPIOID ANALGESICS may result in potentiation of sedative effects
114	Electronic	DIPYRONE -- HEPARIN SODIUM	Not Specified	Major	Fair	Concurrent use of ANTICOAGULANTS and NSAIDS may result in increased risk of bleeding.
115	Electronic	AZITHROMYCIN -- EFAVIRENZ	Not Specified	Major	Fair	Concurrent use of EFAVIRENZ and QT-PROLONGING DRUGS may result in increased risk of QT interval prolongation.
115	Electronic	AZITHROMYCIN -- FLUCONAZOLE	Not Specified	Major	Fair	Concurrent use of AZITHROMYCIN and FLUCONAZOLE may result in an increased risk of QT interval prolongation
115	Electronic	DIPYRONE -- HEPARIN SODIUM	Not Specified	Major	Fair	Concurrent use of ANTICOAGULANTS and NSAIDS may result in increased risk of bleeding.
115	Electronic	DIPYRONE -- TENOFOVIR DISOPROXIL FUMARATE	Delayed	Major	Excellent	Concurrent use of TENOFOVIR DISOPROXIL FUMARATE and NSAIDS may result in increased risk of acute renal failure.
115	Electronic	EFAVIRENZ -- FLUCONAZOLE	Not Specified	Major	Fair	Concurrent use of EFAVIRENZ and QT-PROLONGING DRUGS may result in increased risk of QT interval prolongation.
115	Electronic	EFAVIRENZ -- RIFAMPIN	Delayed	Major	Fair	Concurrent use of EFAVIRENZ and RIFAMPIN may result in possible decreased serum efavirenz concentrations.
115	Electronic	FLUCONAZOLE -- SULFAMETHOXAZOLE/ TRIMETHOPRIM	Not Specified	Major	Fair	Concurrent use of COTRIMOXAZOLE and FLUCONAZOLE may result in an increased risk of cardiotoxicity (QT prolongation, torsades de pointes, cardiac arrest).
115	Electronic	FLUCONAZOLE -- OMEPRAZOLE	Rapid	Moderate	Excellent	Concurrent use of FLUCONAZOLE and OMEPRAZOLE may result in increased plasma concentrations of omeprazole.
115	Electronic	FLUCONAZOLE -- RIFAMPIN	Delayed	Moderate	Excellent	Concurrent use of FLUCONAZOLE and RIFAMPIN may result in decreased fluconazole serum concentrations and antifungal activity.
115	Electronic	OMEPRAZOLE -- RIFAMPIN	Not Specified	Moderate	Fair	Concurrent use of OMEPRAZOLE and RIFAMPIN may result in decreased omeprazole plasma concentrations
116	Electronic	CILOSTAZOL -- DIPYRONE	Not Specified	Major	Fair	Concurrent use of ANTIPLATELET AGENTS and NSAIDS may result in increased risk of bleeding
116	Electronic	CILOSTAZOL -- OMEPRAZOLE	Not Specified	Major	Fair	Concurrent use of CILOSTAZOL and SELECTED CYP2C19 INHIBITORS may result in increased cilostazol exposure.
116	Electronic	DIPYRONE -- ENOXAPARIN SODIUM	Not Specified	Major	Good	Concurrent use of LOW-MOLECULAR-WEIGHT HEPARINS and NSAIDS may result in an increased risk of bleeding
117	Electronic	BROMOPRIDE -- ESCITALOPRAM OXALATE	Not Specified	Contraindicated	Fair	Concurrent use of BROMOPRIDE and DRUGS THAT CAUSE EXTRAPYRAMIDAL REACTIONS may result in increased risk of extrapyramidal reactions.
117	Electronic	BROMOPRIDE -- IMIPRAMINE HYDROCHLORIDE	Not Specified	Contraindicated	Fair	Concurrent use of BROMOPRIDE and DRUGS THAT CAUSE EXTRAPYRAMIDAL REACTIONS may result in increased risk of extrapyramidal reactions.
117	Electronic	BROMOPRIDE -- QUETIAPINE FUMARATE	Not Specified	Contraindicated	Fair	Concurrent use of BROMOPRIDE and DRUGS THAT CAUSE EXTRAPYRAMIDAL REACTIONS may result in increased risk of extrapyramidal reactions.
117	Electronic	BROMOPRIDE -- CLONAZEPAM	Not Specified	Major	Fair	Concurrent use of BROMOPRIDE and SEDATIVES may result in potentiation of sedative effects .
117	Electronic	BROMOPRIDE -- TRAMADOL HYDROCHLORIDE	Not Specified	Major	Fair	Concurrent use of BROMOPRIDE and OPIOID ANALGESICS may result in potentiation of sedative effects
117	Electronic	CLONAZEPAM -- TRAMADOL HYDROCHLORIDE	Not Specified	Major	Fair	Concurrent use of TRAMADOL and CNS DEPRESSANTS may result in increased risk of respiratory and CNS depression.
117	Electronic	DIPYRONE -- ESCITALOPRAM OXALATE	Not Specified	Major	Excellent	Concurrent use of NSAID and SSRI may result in an increased risk of bleeding.
117	Electronic	DIPYRONE -- IMIPRAMINE HYDROCHLORIDE	Not Specified	Major	Excellent	Concurrent use of NSAID and TRICYCLIC ANTIDEPRESSANTS may result in an increased risk of bleeding.
117	Electronic	ESCITALOPRAM OXALATE -- IMIPRAMINE HYDROCHLORIDE	Not Specified	Major	Fair	Concurrent use of ESCITALOPRAM and QT INTERVAL-PROLONGING DRUGS may result in increased risk of QT-interval prolongation.
117	Electronic	ESCITALOPRAM OXALATE -- OMEPRAZOLE	Not Specified	Major	Fair	Concurrent use of ESCITALOPRAM and CYP2C19 INHIBITORS may result in increased escitalopram exposure.
117	Electronic	ESCITALOPRAM OXALATE -- QUETIAPINE FUMARATE	Not Specified	Major	Fair	Concurrent use of QUETIAPINE and QT INTERVAL PROLONGING AGENTS may result in increased risk of QT-interval prolongation.
117	Electronic	ESCITALOPRAM OXALATE -- TRAMADOL HYDROCHLORIDE	Not Specified	Major	Fair	Concurrent use of TRAMADOL and SEROTONERGIC AGENTS may result in increased risk of serotonin syndrome.
117	Electronic	IMIPRAMINE HYDROCHLORIDE -- QUETIAPINE FUMARATE	Not Specified	Major	Fair	Concurrent use of QUETIAPINE and QT INTERVAL PROLONGING AGENTS may result in increased risk of QT-interval prolongation.
117	Electronic	IMIPRAMINE HYDROCHLORIDE -- TRAMADOL HYDROCHLORIDE	Not Specified	Major	Fair	Concurrent use of TRAMADOL and SEROTONERGIC AGENTS WITH ANTICHOLINERGIC PROPERTIES may result in increased risk of paralytic ileus; increased risk of serotonin syndrome.
117	Electronic	QUETIAPINE FUMARATE -- TRAMADOL HYDROCHLORIDE	Not Specified	Major	Fair	Concurrent use of TRAMADOL and CNS DEPRESSANTS may result in increased risk of respiratory and CNS depression.
118	Electronic	BROMOPRIDE -- SERTRALINE HYDROCHLORIDE	Not Specified	Contraindicated	Fair	Concurrent use of BROMOPRIDE and DRUGS THAT CAUSE EXTRAPYRAMIDAL REACTIONS may result in increased risk of extrapyramidal reactions.
118	Electronic	DIPYRONE -- ENOXAPARIN SODIUM	Not Specified	Major	Good	Concurrent use of LOW-MOLECULAR-WEIGHT HEPARINS and NSAIDS may result in an increased risk of bleeding.
118	Electronic	DIPYRONE -- SERTRALINE HYDROCHLORIDE	Not Specified	Major	Excellent	Concurrent use of NSAID and SSRI may result in an increased risk of bleeding.
118	Electronic	ENOXAPARIN SODIUM -- SERTRALINE HYDROCHLORIDE	Delayed	Major	Good	Concurrent use of SERTRALINE and ANTICOAGULANTS may result in an increased risk of bleeding.
119	Electronic	BROMOPRIDE -- CLONAZEPAM	Not Specified	Major	fair	Concurrent use of BROMOPRIDE and SEDATIVES may result in potentiation of sedative effects .
119	Electronic	BROMOPRIDE -- TRAMADOL HYDROCHLORIDE	Not Specified	Major	Fair	Concurrent use of BROMOPRIDE and OPIOID ANALGESICS may result in potentiation of sedative effects .
119	Electronic	CLONAZEPAM -- TRAMADOL HYDROCHLORIDE	Not Specified	Major	Fair	Concurrent use of TRAMADOL and CNS DEPRESSANTS may result in increased risk of respiratory and CNS depression.
119	Electronic	DIPYRONE -- ENOXAPARIN SODIUM	Not Specified	Major	Good	Concurrent use of LOW-MOLECULAR-WEIGHT HEPARINS and NSAIDS may result in an increased risk of bleeding.
119	Electronic	DIPYRONE -- HYDROCHLOROTHIAZIDE	Delayed	Major	Good	Concurrent use of NSAIDS and THIAZIDE DIURETICS may result in reduced diuretic effectiveness and possible nephrotoxicity.
120	Electronic	KETOCONAZOLE -- MIDAZOLAM HYDROCHLORIDE	Rapid	Contraindicated	Excellent	Concurrent use of KETOCONAZOLE and MIDAZOLAM may result in increased midazolam concentrations, and potentially increased midazolam toxicity (excessive sedation and prolonged hypnotic effects).
120	Electronic	KETOCONAZOLE -- ONDANSETRON	Not Specified	Contraindicated	Fair	Concurrent use of KETOCONAZOLE and ONDANSETRON may result in increased ondansetron plasma concentrations and an increased risk of cardiotoxicity (QT prolongation, torsades de pointes, cardiac arrest)
120	Electronic	BROMOPRIDE -- FENTANYL	Not Specified	Major	Fair	Concurrent use of BROMOPRIDE and OPIOID ANALGESICS may result in potentiation of sedative effects
120	Electronic	BROMOPRIDE -- MIDAZOLAM HYDROCHLORIDE	Not Specified	Major	Fair	Concurrent use of BROMOPRIDE and SEDATIVES may result in potentiation of sedative effects .
120	Electronic	DIPYRONE -- FUROSEMIDE	Not Specified	Major	Good	Concurrent use of LOOP DIURETICS and NSAIDS may result in reduced diuretic effectiveness and possible nephrotoxicity.
120	Electronic	FENTANYL -- KETOCONAZOLE	Not Specified	Major	Excellent	Concurrent use of FENTANYL and CYP3A4 INHIBITORS may result in increased risk of fentanyl toxicity.
120	Electronic	FENTANYL -- MIDAZOLAM HYDROCHLORIDE	Not Specified	Major	Fair	Concurrent use of FENTANYL and CNS DEPRESSANTS may result in increased risk of CNS depression.
120	Electronic	FENTANYL -- ONDANSETRON	Delayed	Major	Fair	Concurrent use of FENTANYL and SEROTONERGIC AGENTS may result in increased risk of serotonin syndrome
120	Electronic	KETOCONAZOLE -- OMEPRAZOLE	Not Specified	Major	Fair	Concurrent use of KETOCONAZOLE and PROTON PUMP INHIBITORS may result in decreased ketoconazole exposure.
120	Electronic	KETOCONAZOLE -- SODIUM BICARBONATE	Not Specified	Major	Good	Concurrent use of KETOCONAZOLE and ALUMINUM, CALCIUM OR MAGNESIUM CONTAINING PRODUCTS may result in decreased ketoconazole exposure.
120	Electronic	MIDAZOLAM HYDROCHLORIDE -- OMEPRAZOLE	Delayed	Moderate	Fair	Concurrent use of MIDAZOLAM and OMEPRAZOLE may result in benzodiazepine toxicity (CNS depression, ataxia, lethargy).
120	Electronic	FUROSEMIDE -- SUCCINYLCHOLINE CHLORIDE	Rapid	Minor	Fair	Concurrent use of FUROSEMIDE and SUCCINYLCHOLINE may result in alterations of neuromuscular blockade.
121	Electronic	BROMOPRIDE -- MEPERIDINE HYDROCHLORIDE	Not Specified	Major	Fair	Concurrent use of BROMOPRIDE and OPIOID ANALGESICS may result in potentiation of sedative effects
121	Electronic	BROMOPRIDE -- MIDAZOLAM HYDROCHLORIDE	Not Specified	Major	Fair	Concurrent use of BROMOPRIDE and SEDATIVES may result in potentiation of sedative effects
121	Electronic	MEPERIDINE HYDROCHLORIDE -- MIDAZOLAM HYDROCHLORIDE	Not Specified	Major	Fair	Concurrent use of MEPERIDINE and SEDATIVES may result in increased risk of respiratory or CNS depression.
121	Electronic	MIDAZOLAM HYDROCHLORIDE -- OMEPRAZOLE	Delayed	Moderate	Fair	Concurrent use of MIDAZOLAM and OMEPRAZOLE may result in benzodiazepine toxicity (CNS depression, ataxia, lethargy)
122	Electronic	BROMOPRIDE -- QUETIAPINE FUMARATE	Not Specified	Contraindicated	Fair	Concurrent use of BROMOPRIDE and DRUGS THAT CAUSE EXTRAPYRAMIDAL REACTIONS may result in increased risk of extrapyramidal reactions.
122	Electronic	DIPYRONE -- LOSARTAN POTASSIUM	Not Specified	Moderate	Excellent	Concurrent use of ACE INHIBITORS AND ANGIOTENSIN RECEPTOR BLOCKERS and NSAIDS may result in renal dysfunction and/ or increased blood pressure.
123	Electronic	DIPYRONE -- HEPARIN SODIUM	Not Specified	Major	Fair	Concurrent use of ANTICOAGULANTS and NSAIDS may result in increased risk of bleeding.
123	Electronic	METOCLOPRAMIDE HYDROCHLORIDE -- TRAMADOL HYDROCHLORIDE	Not Specified	Major	Fair	Concurrent use of METOCLOPRAMIDE and CNS DEPRESSANTS may result in increased risk of CNS depression
123	Electronic	ONDANSETRON -- TRAMADOL HYDROCHLORIDE	Not Specified	Major	Fair	Concurrent use of TRAMADOL and SEROTONERGIC AGENTS may result in increased risk of serotonin syndrome.
124	Electronic	DEXAMETHASONE -- DIPYRONE	Not Specified	Major	Fair	Concurrent use of CORTICOSTEROIDS and NSAIDS may result in increased risk of gastrointestinal ulcer or bleeding.
124	Electronic	DIPYRONE -- ENOXAPARIN SODIUM	Not Specified	Major	Good	Concurrent use of LOW-MOLECULAR-WEIGHT HEPARINS and NSAIDS may result in an increased risk of bleeding.
124	Electronic	DIPYRONE -- HYDROCHLOROTHIAZIDE	Delayed	Major	Good	Concurrent use of NSAIDS and THIAZIDE DIURETICS may result in reduced diuretic effectiveness and possible nephrotoxicity.
125	Electronic	BROMOPRIDE -- CLOMIPRAMINE HYDROCHLORIDE	Not Specified	Contraindicated	Fair	Concurrent use of BROMOPRIDE and DRUGS THAT CAUSE EXTRAPYRAMIDAL REACTIONS may result in increased risk of extrapyramidal reactions.
125	Electronic	BROMOPRIDE -- DIAZEPAM	Not Specified	Major	Fair	Concurrent use of BROMOPRIDE and SEDATIVES may result in potentiation of sedative effects
125	Electronic	CARBAMAZEPINE -- FLUCONAZOLE	Not Specified	Major	Good	Concurrent use of CARBAMAZEPINE and FLUCONAZOLE may result in increased carbamazepine exposure and increased risk of toxicity.
125	Electronic	FLUCONAZOLE -- CLOMIPRAMINE HYDROCHLORIDE	Not Specified	Major	Fair	Concurrent use of CLOMIPRAMINE and FLUCONAZOLE may result in an increased risk of QT interval prolongation
125	Electronic	CARBAMAZEPINE -- OMEPRAZOLE	Delayed	Moderate	Good	Concurrent use of CARBAMAZEPINE and OMEPRAZOLE may result in an increased risk of carbamazepine toxicity.
125	Electronic	CARBAMAZEPINE -- ACETAMINOPHEN	Delayed	Moderate	Good	Concurrent use of ACETAMINOPHEN and CARBAMAZEPINE may result in an increased risk of acetaminophen hepatotoxicity.
125	Electronic	CARBAMAZEPINE -- CLOMIPRAMINE HYDROCHLORIDE	Delayed	Moderate	Fair	Concurrent use of CARBAMAZEPINE and CLOMIPRAMINE may result in decreased clomiPRAMINE effectiveness
125	Electronic	DEXAMETHASONE -- FLUCONAZOLE	Not Specified	Moderate	Fair	Concurrent use of FLUCONAZOLE and SELECTED GLUCOCORTICOIDS may result in increased glucocorticoid exposure and risk for toxicity.
125	Electronic	FLUCONAZOLE -- OMEPRAZOLE	Rapid	Moderate	Excellent	Concurrent use of FLUCONAZOLE and OMEPRAZOLE may result in increased plasma concentrations of omeprazole.
125	Electronic	DIAZEPAM -- OMEPRAZOLE	Delayed	Minor	Good	Concurrent use of OMEPRAZOLE and DIAZEPAM may result in enhanced and prolonged diazepam effects.
126	Electronic	DIPYRONE -- LOSARTAN POTASSIUM	Not Specified	Moderate	Excellent	Concurrent use of ACE INHIBITORS AND ANGIOTENSIN RECEPTOR BLOCKERS and NSAIDS may result in renal dysfunction and/ or increased blood pressure.
126	Electronic	DIPYRONE -- PROPRANOLOL HYDROCHLORIDE	Delayed	Moderate	Good	Concurrent use of BETA-ADRENERGIC BLOCKERS and NSAIDS may result in increased blood pressure.
126	Electronic	INSULIN HUMAN REGULAR -- LOSARTAN POTASSIUM	Not Specified	Moderate	Fair	Concurrent use of ANGIOTENSIN RECEPTOR BLOCKERS and INSULIN may result in increased risk of hypoglycemia.
126	Electronic	INSULIN HUMAN REGULAR -- PROPRANOLOL HYDROCHLORIDE	Delayed	Moderate	Good	Concurrent use of ANTIDIABETIC AGENTS and BETA-ADRENERGIC BLOCKERS may result in hypoglycemia or hyperglycemia; decreased symptoms of hypoglycemia.
127	Electronic	DIPYRONE -- ENOXAPARIN SODIUM	Not Specified	Major	Good	Concurrent use of LOW-MOLECULAR-WEIGHT HEPARINS and NSAIDS may result in an increased risk of bleeding.
127	Electronic	INSULIN HUMAN REGULAR -- OCTREOTIDE ACETATE	Not Specified	Major	Fair	Concurrent use of ANTIDIABETIC AGENTS and SOMATOSTATIN ANALOGUES may result in impaired glucose regulation.
127	Electronic	CARVEDILOL -- DIPYRONE	Delayed	Moderate	Good	Concurrent use of BETA-ADRENERGIC BLOCKERS and NSAIDS may result in increased blood pressure.
127	Electronic	CARVEDILOL -- INSULIN HUMAN REGULAR	Delayed	Moderate	Good	Concurrent use of ANTIDIABETIC AGENTS and BETA-ADRENERGIC BLOCKERS may result in hypoglycemia or hyperglycemia; decreased symptoms of hypoglycemia.
128	Electronic	DEXAMETHASONE/ NEOMYCIN SULFATE/ POLYMYXIN B SULFATE -- DIPYRONE	Not Specified	Major	Fair	Concurrent use of CORTICOSTEROIDS and NSAIDS may result in increased risk of gastrointestinal ulcer or bleeding.
128	Electronic	DIPYRONE -- HYDROCHLOROTHIAZIDE	Delayed	Major	Good	Concurrent use of NSAIDS and THIAZIDE DIURETICS may result in reduced diuretic effectiveness and possible nephrotoxicity.
128	Electronic	AMPHOTERICIN B LIPOSOME -- DEXAMETHASONE/ NEOMYCIN SULFATE/ POLYMYXIN B SULFATE	Not Specified	Moderate	Fair	Concurrent use of AMPHOTERICIN B LIPOSOME and CORTICOSTEROIDS may result in an increased risk of hypokalemia.
128	Electronic	CLONIDINE -- INSULIN HUMAN ISOPHANE (NPH)	Not Specified	Moderate	Fair	Concurrent use of CLONIDINE and INSULIN may result in hypoglycemia or hyperglycemia.
128	Electronic	CLONIDINE -- INSULIN HUMAN REGULAR	Not Specified	Moderate	Fair	Concurrent use of CLONIDINE and INSULIN may result in hypoglycemia or hyperglycemia.
128	Electronic	DIPYRONE -- LOSARTAN POTASSIUM	Not Specified	Moderate	Excellent	Concurrent use of ACE INHIBITORS AND ANGIOTENSIN RECEPTOR BLOCKERS and NSAIDS may result in renal dysfunction and/ or increased blood pressure.
128	Electronic	HYDROCHLOROTHIAZIDE -- INSULIN HUMAN ISOPHANE (NPH)	Not Specified	Moderate	Fair	Concurrent use of ANTIDIABETIC AGENTS and SELECTED DIURETICS may result in increased hyperglycemia risk; increased insulin requirement.
128	Electronic	HYDROCHLOROTHIAZIDE -- INSULIN HUMAN REGULAR	Not Specified	Moderate	Fair	Concurrent use of ANTIDIABETIC AGENTS and SELECTED DIURETICS may result in increased hyperglycemia risk; increased insulin requirement.
128	Electronic	INSULIN HUMAN ISOPHANE (NPH) -- LOSARTAN POTASSIUM	Not Specified	Moderate	Fair	Concurrent use of ANGIOTENSIN RECEPTOR BLOCKERS and INSULIN may result in increased risk of hypoglycemia.
128	Electronic	INSULIN HUMAN REGULAR -- LOSARTAN POTASSIUM	Not Specified	Moderate	Fair	Concurrent use of ANGIOTENSIN RECEPTOR BLOCKERS and INSULIN may result in increased risk of hypoglycemia.
129	Electronic	DEXAMETHASONE -- DIPYRONE	Not Specified	Major	Fair	Concurrent use of CORTICOSTEROIDS and NSAIDS may result in increased risk of gastrointestinal ulcer or bleeding.
130	Electronic	None
131	Electronic	BROMOPRIDE -- CLONAZEPAM	Not Specified	Major	Fair	Concurrent use of BROMOPRIDE and SEDATIVES may result in potentiation of sedative effects
131	Electronic	BROMOPRIDE -- DIAZEPAM	Not Specified	Major	Fair	Concurrent use of BROMOPRIDE and SEDATIVES may result in potentiation of sedative effects .
131	Electronic	BROMOPRIDE -- PHENOBARBITAL	Not Specified	Major	Fair	Concurrent use of BROMOPRIDE and SEDATIVES may result in potentiation of sedative effects
131	Electronic	CLOBAZAM -- PHENOBARBITAL	Not Specified	Major	Good	Concurrent use of BARBITURATES and BENZODIAZEPINES may result in additive respiratory depression.
131	Electronic	CLONAZEPAM -- PHENOBARBITAL	Not Specified	Major	Good	Concurrent use of BARBITURATES and BENZODIAZEPINES may result in additive respiratory depression.
131	Electronic	DIAZEPAM -- PHENOBARBITAL	Not Specified	Major	Good	Concurrent use of BARBITURATES and BENZODIAZEPINES may result in additive respiratory depression.
131	Electronic	DIPYRONE -- HEPARIN SODIUM	Not Specified	Major	Fair	Concurrent use of ANTICOAGULANTS and NSAIDS may result in increased risk of bleeding.
131	Electronic	DIPYRONE -- HYDROCORTISONE	Not Specified	Major	Fair	Concurrent use of CORTICOSTEROIDS and NSAIDS may result in increased risk of gastrointestinal ulcer or bleeding.
131	Electronic	DIPYRONE -- PREDNISONE	Not Specified	Major	Fair	Concurrent use of CORTICOSTEROIDS and NSAIDS may result in increased risk of gastrointestinal ulcer or bleeding.
131	Electronic	HYDROCORTISONE -- PHENOBARBITAL	Delayed	Moderate	Fair	Concurrent use of HYDROCORTISONE and PHENOBARBITAL may result in decreased corticosteroid effectiveness.
131	Electronic	LAMOTRIGINE -- PHENOBARBITAL	Not Specified	Moderate	Good	Concurrent use of PHENOBARBITAL and LAMOTRIGINE may result in reduced lamotrigine efficacy, loss of seizure control.
131	Electronic	PHENOBARBITAL -- PREDNISONE	Delayed	Moderate	Good	Concurrent use of PHENOBARBITAL and PREDNISONE may result in decreased therapeutic effect of predniSONE.
132	Electronic	BROMOPRIDE -- HALOPERIDOL	Not Specified	Contraindicated	Fair	Concurrent use of BROMOPRIDE and DRUGS THAT CAUSE EXTRAPYRAMIDAL REACTIONS may result in increased risk of extrapyramidal reactions.
132	Electronic	BROMOPRIDE -- QUETIAPINE FUMARATE	Not Specified	Contraindicated	Fair	Concurrent use of BROMOPRIDE and DRUGS THAT CAUSE EXTRAPYRAMIDAL REACTIONS may result in increased risk of extrapyramidal reactions.
132	Electronic	ASPIRIN -- CLOPIDOGREL HYDROGEN SULFATE	Not Specified	Major	Fair	Concurrent use of ASPIRIN and CLOPIDOGREL may result in an increased risk of bleeding.
132	Electronic	ASPIRIN -- DIPYRONE	Not Specified	Major	Excellent	Concurrent use of ASPIRIN and DIPYRONE may result in reduced efficacy of aspirin.
132	Electronic	ASPIRIN -- HEPARIN SODIUM	Not Specified	Major	Fair	Concurrent use of ANTICOAGULANTS and ANTIPLATELET AGENTS may result in increased risk of bleeding.
132	Electronic	BROMOPRIDE -- TRAMADOL HYDROCHLORIDE	Not Specified	Major	Fair	Concurrent use of BROMOPRIDE and OPIOID ANALGESICS may result in potentiation of sedative effects .
132	Electronic	CLOPIDOGREL HYDROGEN SULFATE -- DIPYRONE	Not Specified	Major	Fair	Concurrent use of ANTIPLATELET AGENTS and NSAIDS may result in increased risk of bleeding.
132	Electronic	CLOPIDOGREL HYDROGEN SULFATE -- HEPARIN SODIUM	Not Specified	Major	Fair	Concurrent use of ANTICOAGULANTS and ANTIPLATELET AGENTS may result in increased risk of bleeding.
132	Electronic	CLOPIDOGREL HYDROGEN SULFATE -- OMEPRAZOLE	Rapid	Major	Excellent	Concurrent use of CLOPIDOGREL and OMEPRAZOLE may result in reduced plasma concentrations of clopidogrel active metabolite and reduced antiplatelet activity.
132	Electronic	CLOPIDOGREL HYDROGEN SULFATE -- TRAMADOL HYDROCHLORIDE	Rapid	Major	Good	Concurrent use of CLOPIDOGREL and OPIOID AGONISTS may result in reduced efficacy of clopidogrel.
132	Electronic	DIPYRONE -- HEPARIN SODIUM	Not Specified	Major	Fair	Concurrent use of ANTICOAGULANTS and NSAIDS may result in increased risk of bleeding.
132	Electronic	HALOPERIDOL -- QUETIAPINE FUMARATE	Not Specified	Major	Fair	Concurrent use of QUETIAPINE and QT INTERVAL PROLONGING AGENTS may result in increased risk of QT-interval prolongation.
132	Electronic	HALOPERIDOL -- TRAMADOL HYDROCHLORIDE	Not Specified	Major	Fair	Concurrent use of TRAMADOL and CNS DEPRESSANTS may result in increased risk of respiratory and CNS depression.
132	Electronic	QUETIAPINE FUMARATE -- TRAMADOL HYDROCHLORIDE	Not Specified	Major	Fair	Concurrent use of TRAMADOL and CNS DEPRESSANTS may result in increased risk of respiratory and CNS depression.
132	Electronic	ASPIRIN -- ATENOLOL	Delayed	Moderate	Good	Concurrent use of BETA-ADRENERGIC BLOCKERS and NSAIDS may result in increased blood pressure.
132	Electronic	ATENOLOL -- DIPYRONE	Delayed	Moderate	Good	Concurrent use of BETA-ADRENERGIC BLOCKERS and NSAIDS may result in increased blood pressure.
132	Electronic	ATORVASTATIN CALCIUM -- CLOPIDOGREL HYDROGEN SULFATE	Not Specified	Moderate	Excellent	Concurrent use of CLOPIDOGREL and CYP3A4 METABOLIZED STATINS may result in decreased formation of clopidogrel active metabolite resulting in high on-treatment platelet reactivity.
133	Electronic	BROMOPRIDE -- PHENOBARBITAL	Not Specified	Major	Fair	Concurrent use of BROMOPRIDE and SEDATIVES may result in potentiation of sedative effects .
133	Electronic	BROMOPRIDE -- TRAMADOL HYDROCHLORIDE	Not Specified	Major	Fair	Concurrent use of BROMOPRIDE and OPIOID ANALGESICS may result in potentiation of sedative effects .
133	Electronic	PHENOBARBITAL -- TRAMADOL HYDROCHLORIDE	Not Specified	Major	Fair	Concurrent use of TRAMADOL and PHENOBARBITAL may result in increased risk of CNS depression and decreased plasma concentrations of tramadol.
133	Electronic	LEVOTHYROXINE SODIUM -- OMEPRAZOLE	Not Specified	Moderate	Good	Concurrent use of LEVOTHYROXINE and PROTON PUMP INHIBITORS may result in decreased levothyroxine effectiveness
133	Electronic	LEVOTHYROXINE SODIUM -- PHENOBARBITAL	Not Specified	Moderate	Fair	Concurrent use of LEVOTHYROXINE and PHENOBARBITAL may result in decreased levothyroxine effectiveness.
134	Electronic	BROMOPRIDE -- PHENOBARBITAL	Not Specified	Major	Fair	Concurrent use of BROMOPRIDE and SEDATIVES may result in potentiation of sedative effects
134	Electronic	ENOXAPARIN SODIUM -- IBUPROFEN	Not Specified	Major	Good	Concurrent use of LOW-MOLECULAR-WEIGHT HEPARINS and NSAIDS may result in an increased risk of bleeding.
134	Electronic	PHENOBARBITAL -- VALPROIC ACID	Delayed	Moderate	Good	Concurrent use of PHENOBARBITAL and VALPROIC ACID may result in phenobarbital toxicity or decreased valproic acid effectiveness.
134	Electronic	PHENYTOIN -- VALPROIC ACID	Delayed	Moderate	Good	Concurrent use of PHENYTOIN and VALPROIC ACID may result in altered valproate levels or altered phenytoin levels
134	Electronic	PHENOBARBITAL -- PHENYTOIN	Delayed	Minor	Good	Concurrent use of PHENOBARBITAL and PHENYTOIN may result in increased or decreased phenytoin levels.
135	Electronic	BROMOPRIDE -- TRAMADOL HYDROCHLORID	Not Specified	Major	Fair	Concurrent use of BROMOPRIDE and OPIOID ANALGESICS may result in potentiation of sedative effects .
135	Electronic	DIPYRONE -- ENOXAPARIN SODIUM	Not Specified	Major	Good	Concurrent use of LOW-MOLECULAR-WEIGHT HEPARINS and NSAIDS may result in an increased risk of bleeding.
136	Electronic	None
137	Electronic	BROMOPRIDE -- MORPHINE SULFATE	Not Specified	Major	Fair	Concurrent use of BROMOPRIDE and OPIOID ANALGESICS may result in potentiation of sedative effects .
137	Electronic	DEXAMETHASONE -- DIPYRONE	Not Specified	Major	Fair	Concurrent use of CORTICOSTEROIDS and NSAIDS may result in increased risk of gastrointestinal ulcer or bleeding.
137	Electronic	DIPYRONE -- HEPARIN SODIUM	Not Specified	Major	Fair	Concurrent use of ANTICOAGULANTS and NSAIDS may result in increased risk of bleeding.
137	Electronic	INSULIN HUMAN REGULAR -- METOCLOPRAMIDE HYDROCHLORIDE	Not Specified	Major	Fair	Concurrent use of METOCLOPRAMIDE and INSULINS may result in risk of hyperglycemia
137	Electronic	METOCLOPRAMIDE HYDROCHLORIDE -- MORPHINE SULFATE	Not Specified	Major	Fair	Concurrent use of METOCLOPRAMIDE and CNS DEPRESSANTS may result in increased risk of CNS depression
137	Electronic	MORPHINE SULFATE -- ONDANSETRON	Not Specified	Major	Fair	Concurrent use of MORPHINE and SEROTONERGIC AGENTS may result in increased risk of serotonin syndrome.
138	Electronic	AMITRIPTYLINE HYDROCHLORIDE -- BROMOPRIDE	Not Specified	Contraindicated	Fair	Concurrent use of BROMOPRIDE and DRUGS THAT CAUSE EXTRAPYRAMIDAL REACTIONS may result in increased risk of extrapyramidal reactions.
138	Electronic	AMITRIPTYLINE HYDROCHLORIDE -- DIPYRONE	Not Specified	Major	Excellent	Concurrent use of NSAID and TRICYCLIC ANTIDEPRESSANTS may result in an increased risk of bleeding.
138	Electronic	AMITRIPTYLINE HYDROCHLORIDE -- TRAMADOL HYDROCHLORIDE	Not Specified	Major	Fair	Concurrent use of TRAMADOL and SEROTONERGIC AGENTS WITH ANTICHOLINERGIC PROPERTIES may result in increased risk of paralytic ileus; increased risk of serotonin syndrome.
138	Electronic	BROMOPRIDE -- TRAMADOL HYDROCHLORIDE	Not Specified	Major	Fair	Concurrent use of BROMOPRIDE and OPIOID ANALGESICS may result in potentiation of sedative effects .
138	Electronic	CARBAMAZEPINE -- TRAMADOL HYDROCHLORIDE	Not Specified	Major	Fair	Concurrent use of TRAMADOL and SEROTONERGIC CYP3A4 INDUCERS may result in increased risk of serotonin syndrome and reduced tramadol plasma concentrations.
138	Electronic	DIPYRONE -- ENOXAPARIN SODIUM	Not Specified	Major	Good	Concurrent use of LOW-MOLECULAR-WEIGHT HEPARINS and NSAIDS may result in an increased risk of bleeding.
138	Electronic	AMITRIPTYLINE HYDROCHLORIDE -- CARBAMAZEPINE	Delayed	Moderate	Good	Concurrent use of CARBAMAZEPINE and AMITRIPTYLINE may result in decreased amitriptyline effectiveness
139	Electronic	POTASSIUM CHLORIDE -- SCOPOLAMINE	Rapid	Contraindicated	Fair	Concurrent use of POTASSIUM and SCOPOLAMINE may result in risk of gastrointestinal lesions.
139	Electronic	CIPROFLOXACIN -- INSULIN HUMAN REGULAR	Not Specified	Major	Fair	Concurrent use of FLUOROQUINOLONES and ANTIDIABETIC AGENTS may result in changes in blood glucose and increased risk of hypoglycemia or hyperglycemia.
139	Electronic	CIPROFLOXACIN -- METHADONE HYDROCHLORIDE	Not Specified	Major	Fair	Concurrent use of METHADONE and CYP3A4 INHIBITORS THAT PROLONG THE QT INTERVAL may result in increased risk of QT interval prolongation; increased risk of opioid adverse effects.
139	Electronic	CIPROFLOXACIN -- METRONIDAZOLE	Not Specified	Major	Fair	Concurrent use of METRONIDAZOLE and QT INTERVAL PROLONGING DRUGS may result in increased risk of QT-interval prolongation and arrhythmias.
139	Electronic	CIPROFLOXACIN -- ONDANSETRON	Not Specified	Major	Fair	Concurrent use of CIPROFLOXACIN and ONDANSETRON may result in an increased risk of QT interval prolongation.
139	Electronic	CIPROFLOXACIN -- VORICONAZOLE	Not Specified	Major	Fair	Concurrent use of CIPROFLOXACIN and VORICONAZOLE may result in an increased risk of QT interval prolongation.
139	Electronic	METHADONE HYDROCHLORIDE -- METRONIDAZOLE	Not Specified	Major	Fair	Concurrent use of METRONIDAZOLE and QT INTERVAL PROLONGING DRUGS may result in increased risk of QT-interval prolongation and arrhythmias.
139	Electronic	METHADONE HYDROCHLORIDE -- MORPHINE SULFATE	Not Specified	Major	Fair	Concurrent use of MORPHINE and SEROTONERGIC CNS DEPRESSANTS may result in increased risk of respiratory and CNS depression; increased risk of serotonin syndrome.
139	Electronic	METHADONE HYDROCHLORIDE -- ONDANSETRON	Rapid	Major	Fair	Concurrent use of METHADONE and SEROTONERGIC DRUGS THAT PROLONG THE QT INTERVAL may result in increased risk of serotonin syndrome; increased risk of QT prolongation.
139	Electronic	METHADONE HYDROCHLORIDE -- VORICONAZOLE	Not Specified	Major	Fair	Concurrent use of METHADONE and CYP3A4 INHIBITORS THAT PROLONG THE QT INTERVAL may result in increased risk of QT interval prolongation; increased risk of opioid adverse effects.
139	Electronic	METRONIDAZOLE -- ONDANSETRON	Not Specified	Major	Fair	Concurrent use of METRONIDAZOLE and QT INTERVAL PROLONGING DRUGS may result in increased risk of QT-interval prolongation and arrhythmias.
139	Electronic	METRONIDAZOLE -- VORICONAZOLE	Not Specified	Major	Fair	Concurrent use of METRONIDAZOLE and QT INTERVAL PROLONGING DRUGS may result in increased risk of QT-interval prolongation and arrhythmias.
139	Electronic	MORPHINE SULFATE -- ONDANSETRON	Not Specified	Major	Fair	Concurrent use of MORPHINE and SEROTONERGIC AGENTS may result in increased risk of serotonin syndrome.
139	Electronic	OMEPRAZOLE -- VORICONAZOLE	Rapid	Major	Excellent	Concurrent use of OMEPRAZOLE and VORICONAZOLE may result in increased plasma concentrations of omeprazole.
139	Electronic	ONDANSETRON -- VORICONAZOLE	Not Specified	Major	Fair	Concurrent use of ONDANSETRON and VORICONAZOLE may result in an increased risk of QT interval prolongation.
140	Electronic	AMITRIPTYLINE HYDROCHLORIDE -- DIPYRONE	Not Specified	Major	Excellent	Concurrent use of NSAID and TRICYCLIC ANTIDEPRESSANTS may result in an increased risk of bleeding.
140	Electronic	AMITRIPTYLINE HYDROCHLORIDE -- METHADONE HYDROCHLORIDE	Rapid	Major	Fair	Concurrent use of METHADONE and SEROTONERGIC DRUGS WITH ANTICHOLINERGIC PROPERTIES THAT PROLONG THE QT INTERVAL may result in increased risk of serotonin syndrome; increased risk of paralytic ileus; increased risk of QT prolongation.
140	Electronic	AMITRIPTYLINE HYDROCHLORIDE -- MORPHINE SULFATE	Not Specified	Major	Fair	Concurrent use of MORPHINE and SEROTONERGIC AGENTS WITH ANTICHOLINERGIC PROPERTIES may result in increased risk of paralytic ileus; increased risk of serotonin syndrome.
140	Electronic	AMITRIPTYLINE HYDROCHLORIDE -- ONDANSETRON	Not Specified	Major	Fair	Concurrent use of AMITRIPTYLINE and ONDANSETRON may result in an increased risk of QT interval prolongation.
140	Electronic	DEXAMETHASONE -- DIPYRONE	Not Specified	Major	Fair	Concurrent use of CORTICOSTEROIDS and NSAIDS may result in increased risk of gastrointestinal ulcer or bleeding.
140	Electronic	DEXAMETHASONE -- METHADONE HYDROCHLORIDE	Not Specified	Major	Fair	Concurrent use of METHADONE and CYP3A4 INDUCERS may result in increased risk of methadone withdrawal symptoms.
140	Electronic	METHADONE HYDROCHLORIDE -- MORPHINE SULFATE	Not Specified	Major	Fair	Concurrent use of MORPHINE and SEROTONERGIC CNS DEPRESSANTS may result in increased risk of respiratory and CNS depression; increased risk of serotonin syndrome.
140	Electronic	METHADONE HYDROCHLORIDE -- ONDANSETRON	Rapid	Major	Fair	Concurrent use of METHADONE and SEROTONERGIC DRUGS THAT PROLONG THE QT INTERVAL may result in increased risk of serotonin syndrome; increased risk of QT prolongation.
140	Electronic	MORPHINE SULFATE -- ONDANSETRON	Not Specified	Major	Fair	Concurrent use of MORPHINE and SEROTONERGIC AGENTS may result in increased risk of serotonin syndrome.
140	Electronic	GABAPENTIN -- MORPHINE SULFATE	Not Specified	Moderate	Excellent	Concurrent use of GABAPENTIN and MORPHINE may result in increase in gabapentin plasma concentrations.
141	Electronic	DIPYRONE -- ENOXAPARIN SODIUM	Not Specified	Major	Good	Concurrent use of LOW-MOLECULAR-WEIGHT HEPARINS and NSAIDS may result in an increased risk of bleeding.
141	Electronic	KETOCONAZOLE -- MAGNESIUM OXIDE	Not Specified	Major	Good	Concurrent use of KETOCONAZOLE and ALUMINUM, CALCIUM OR MAGNESIUM CONTAINING PRODUCTS may result in decreased ketoconazole exposure.
141	Electronic	KETOCONAZOLE -- OMEPRAZOLE	Not Specified	Major	Fair	Concurrent use of KETOCONAZOLE and PROTON PUMP INHIBITORS may result in decreased ketoconazole exposure.
141	Electronic	KETOCONAZOLE -- TRAMADOL HYDROCHLORIDE	Not Specified	Major	Fair	Concurrent use of TRAMADOL and CYP3A4 INHIBITORS may result in increased tramadol exposure and increased risk of respiratory depression.
142	Electronic	DIPYRONE -- PROPRANOLOL HYDROCHLORIDE	Delayed	Moderate	Good	Concurrent use of BETA-ADRENERGIC BLOCKERS and NSAIDS may result in increased blood pressure.
143	Electronic	BROMOPRIDE -- MIRTAZAPINE	Not Specified	Contraindicated	Fair	Concurrent use of BROMOPRIDE and DRUGS THAT CAUSE EXTRAPYRAMIDAL REACTIONS may result in increased risk of extrapyramidal reactions.
143	Electronic	BROMOPRIDE -- QUETIAPINE FUMARATE	Not Specified	Contraindicated	Fair	Concurrent use of BROMOPRIDE and DRUGS THAT CAUSE EXTRAPYRAMIDAL REACTIONS may result in increased risk of extrapyramidal reactions.
143	Electronic	MIRTAZAPINE -- ONDANSETRON	Not Specified	Major	Fair	Concurrent use of MIRTAZAPINE and SEROTONERGIC AGENTS may result in increased risk of serotonin syndrome.
143	Electronic	ONDANSETRON -- QUETIAPINE FUMARATE	Not Specified	Major	Fair	Concurrent use of QUETIAPINE and QT INTERVAL PROLONGING AGENTS may result in increased risk of QT-interval prolongation.
144	Electronic	DIPYRONE -- FUROSEMIDE	Not Specified	Major	Good	Concurrent use of LOOP DIURETICS and NSAIDS may result in reduced diuretic effectiveness and possible nephrotoxicity.
144	Electronic	MEPERIDINE HYDROCHLORIDE -- MIDAZOLAM HYDROCHLORIDE	Not Specified	Major	Fair	Concurrent use of MEPERIDINE and SEDATIVES may result in increased risk of respiratory or CNS depression.
144	Electronic	MEPERIDINE HYDROCHLORIDE -- MORPHINE SULFATE	Not Specified	Major	Fair	Concurrent use of MORPHINE and SEROTONERGIC CNS DEPRESSANTS may result in increased risk of respiratory and CNS depression; increased risk of serotonin syndrome.
144	Electronic	MEPERIDINE HYDROCHLORIDE -- ONDANSETRON	Not Specified	Major	Fair	Concurrent use of MEPERIDINE and SEROTONERGIC AGENTS may result in increased risk of serotonin syndrome
144	Electronic	MEPERIDINE HYDROCHLORIDE -- RANITIDINE HYDROCHLORIDE	Not Specified	Major	Fair	Concurrent use of MEPERIDINE and CYP3A4 INHIBITORS may result in increased meperidine exposure and risk of increased or prolonged opioid effects.
144	Electronic	MIDAZOLAM HYDROCHLORIDE -- MORPHINE SULFATE	Not Specified	Major	Fair	Concurrent use of MORPHINE and CNS DEPRESSANTS may result in increased risk of respiratory and CNS depression
144	Electronic	MORPHINE SULFATE -- ONDANSETRON	Not Specified	Major	Fair	Concurrent use of MORPHINE and SEROTONERGIC AGENTS may result in increased risk of serotonin syndrome.
144	Electronic	FUROSEMIDE -- MORPHINE SULFATE	Not Specified	Moderate	Fair	Concurrent use of MORPHINE and DIURETICS may result in decreased efficacy of diuretics.
144	Electronic	MIDAZOLAM HYDROCHLORIDE -- RANITIDINE HYDROCHLORIDE	Not Specified	Moderate	Fair	Concurrent use of MIDAZOLAM and RANITIDINE may result in increased midazolam bioavailability.
145	Electronic	BROMOPRIDE -- QUETIAPINE FUMARATE	Not Specified	Contraindicated	Fair	Concurrent use of BROMOPRIDE and DRUGS THAT CAUSE EXTRAPYRAMIDAL REACTIONS may result in increased risk of extrapyramidal reactions.
145	Electronic	FLUCONAZOLE -- QUETIAPINE FUMARATE	Not Specified	Contraindicated	Fair	Concurrent use of FLUCONAZOLE and QUETIAPINE may result in increased quetiapine serum concentrations and an increased risk of QT prolongation.
145	Electronic	BROMOPRIDE -- TRAMADOL HYDROCHLORIDE	Not Specified	Major	Fair	Concurrent use of BROMOPRIDE and OPIOID ANALGESICS may result in potentiation of sedative effects .
145	Electronic	DIPYRONE -- FUROSEMIDE	Not Specified	Major	Good	Concurrent use of LOOP DIURETICS and NSAIDS may result in reduced diuretic effectiveness and possible nephrotoxicity
145	Electronic	DIPYRONE -- HEPARIN SODIUM	Not Specified	Major	Fair	Concurrent use of ANTICOAGULANTS and NSAIDS may result in increased risk of bleeding
145	Electronic	DIPYRONE -- PREDNISONE	Not Specified	Major	Fair	Concurrent use of CORTICOSTEROIDS and NSAIDS may result in increased risk of gastrointestinal ulcer or bleeding.
145	Electronic	FLUCONAZOLE -- HYDROXYCHLOROQUINE SULFATE	Not Specified	Major	Good	Concurrent use of HYDROXYCHLOROQUINE and QT PROLONGING AGENTS may result in increased risk of QT-interval prolongation
145	Electronic	FLUCONAZOLE -- TRAMADOL HYDROCHLORIDE	Not Specified	Major	Fair	Concurrent use of TRAMADOL and CYP3A4 INHIBITORS may result in increased tramadol exposure and increased risk of respiratory depression.
145	Electronic	HYDROXYCHLOROQUINE SULFATE -- QUETIAPINE FUMARATE	Not Specified	Major	Fair	Concurrent use of QUETIAPINE and QT INTERVAL PROLONGING AGENTS may result in increased risk of QT-interval prolongation.
145	Electronic	PREDNISONE -- TRAMADOL HYDROCHLORIDE	Not Specified	Major	Fair	Concurrent use of TRAMADOL and CYP3A4 INDUCERS may result in reduced tramadol exposure.
145	Electronic	QUETIAPINE FUMARATE -- TRAMADOL HYDROCHLORIDE	Not Specified	Major	Fair	Concurrent use of TRAMADOL and CNS DEPRESSANTS may result in increased risk of respiratory and CNS depression.
145	Electronic	FLUCONAZOLE -- OMEPRAZOLE	Rapid	Moderate	Excellent	Concurrent use of FLUCONAZOLE and OMEPRAZOLE may result in increased plasma concentrations of omeprazole.
145	Electronic	FLUCONAZOLE -- PREDNISONE	Delayed	Moderate	Good	Concurrent use of FLUCONAZOLE and PREDNISONE may result in a decrease in the metabolic degradation of predniSONE and an increase in predniSONE efficacy.
146	Electronic	None
147	Electronic	BROMOPRIDE -- FENTANYL	Not Specified	Major	Fair	Concurrent use of BROMOPRIDE and OPIOID ANALGESICS may result in potentiation of sedative effects .
147	Electronic	BROMOPRIDE -- MORPHINE SULFATE	Not Specified	Major	Fair	Concurrent use of BROMOPRIDE and OPIOID ANALGESICS may result in potentiation of sedative effects .
147	Electronic	BROMOPRIDE -- PROPOFOL	Not Specified	Major	Fair	Concurrent use of BROMOPRIDE and SEDATIVES may result in potentiation of sedative effects .
147	Electronic	BROMOPRIDE -- REMIFENTANIL HYDROCHLORIDE	Not Specified	Major	Fair	Concurrent use of BROMOPRIDE and OPIOID ANALGESICS may result in potentiation of sedative effects
147	Electronic	BROMOPRIDE -- TRAMADOL HYDROCHLORIDE	Not Specified	Major	Fair	Concurrent use of BROMOPRIDE and OPIOID ANALGESICS may result in potentiation of sedative effects .
147	Electronic	DIPYRONE -- HYDROCORTISONE	Not Specified	Major	Fair	Concurrent use of CORTICOSTEROIDS and NSAIDS may result in increased risk of gastrointestinal ulcer or bleeding.
147	Electronic	DIPYRONE -- PREDNISONE	Not Specified	Major	Fair	Concurrent use of CORTICOSTEROIDS and NSAIDS may result in increased risk of gastrointestinal ulcer or bleeding
147	Electronic	FENTANYL -- MORPHINE SULFATE	Not Specified	Major	Fair	Concurrent use of MORPHINE and SEROTONERGIC CNS DEPRESSANTS may result in increased risk of respiratory and CNS depression; increased risk of serotonin syndrome.
147	Electronic	FENTANYL -- PREDNISONE	Not Specified	Major	Excellent	Concurrent use of FENTANYL and CYP3A4 INDUCERS may result in decreased plasma concentrations of fentanyl.
147	Electronic	FENTANYL -- PROPOFOL	Not Specified	Major	Fair	Concurrent use of FENTANYL and CNS DEPRESSANTS may result in increased risk of CNS depression.
147	Electronic	FENTANYL -- REMIFENTANIL HYDROCHLORIDE	Not Specified	Major	Fair	Concurrent use of FENTANYL and SEROTONERGIC CNS DEPRESSANTS may result in increased risk of respiratory and CNS depression; increased risk of serotonin syndrome.
147	Electronic	FENTANYL -- TRAMADOL HYDROCHLORIDE	Not Specified	Major	Fair	Concurrent use of FENTANYL and SEROTONERGIC CNS DEPRESSANTS may result in increased risk of respiratory and CNS depression; increased risk of serotonin syndrome.
147	Electronic	MORPHINE SULFATE -- PROPOFOL	Not Specified	Major	Fair	Concurrent use of MORPHINE and CNS DEPRESSANTS may result in increased risk of respiratory and CNS depression.
147	Electronic	MORPHINE SULFATE -- REMIFENTANIL HYDROCHLORIDE	Not Specified	Major	Fair	Concurrent use of MORPHINE and SEROTONERGIC CNS DEPRESSANTS may result in increased risk of respiratory and CNS depression; increased risk of serotonin syndrome.
147	Electronic	MORPHINE SULFATE -- TRAMADOL HYDROCHLORIDE	Not Specified	Major	Fair	Concurrent use of MORPHINE and SEROTONERGIC CNS DEPRESSANTS may result in increased risk of respiratory and CNS depression; increased risk of serotonin syndrome.
147	Electronic	PREDNISONE -- TRAMADOL HYDROCHLORIDE	Not Specified	Major	Fair	Concurrent use of TRAMADOL and CYP3A4 INDUCERS may result in reduced tramadol exposure.
147	Electronic	PROPOFOL -- REMIFENTANIL HYDROCHLORIDE	Not Specified	Major	Fair	Concurrent use of REMIFENTANIL and CNS DEPRESSANTS may result in increased risk of CNS depression (ie, respiratory depression, profound sedation, coma).
147	Electronic	PROPOFOL -- TRAMADOL HYDROCHLORIDE	Not Specified	Major	Fair	Concurrent use of TRAMADOL and CNS DEPRESSANTS may result in increased risk of respiratory and CNS depression.
147	Electronic	REMIFENTANIL HYDROCHLORIDE -- TRAMADOL HYDROCHLORIDE	Not Specified	Major	Fair	Concurrent use of TRAMADOL and SEROTONERGIC CNS DEPRESSANTS may result in increased risk of serotonin syndrome; increased risk of respiratory and CNS depression.
147	Electronic	BISOPROLOL FUMARATE -- DIPYRONE	Delayed	Moderate	Good	Concurrent use of BETA-ADRENERGIC BLOCKERS and NSAIDS may result in increased blood pressure.
147	Electronic	DIPYRONE -- ENALAPRIL MALEATE	Not Specified	Moderate	Excellent	Concurrent use of ACE INHIBITORS AND ANGIOTENSIN RECEPTOR BLOCKERS and NSAIDS may result in renal dysfunction and/ or increased blood pressure.
148	Electronic	AMITRIPTYLINE HYDROCHLORIDE -- BROMOPRIDE	Not Specified	Contraindicated	Fair	Concurrent use of BROMOPRIDE and DRUGS THAT CAUSE EXTRAPYRAMIDAL REACTIONS may result in increased risk of extrapyramidal reactions.
148	Electronic	AMITRIPTYLINE HYDROCHLORIDE -- DIPYRONE	Not Specified	Major	Excellent	Concurrent use of NSAID and TRICYCLIC ANTIDEPRESSANTS may result in an increased risk of bleeding.
148	Electronic	AMITRIPTYLINE HYDROCHLORIDE -- MORPHINE SULFATE	Not Specified	Major	Fair	Concurrent use of MORPHINE and SEROTONERGIC AGENTS WITH ANTICHOLINERGIC PROPERTIES may result in increased risk of paralytic ileus; increased risk of serotonin syndrome
148	Electronic	AMITRIPTYLINE HYDROCHLORIDE -- ONDANSETRON	Not Specified	Major	Fair	Concurrent use of AMITRIPTYLINE and ONDANSETRON may result in an increased risk of QT interval prolongation.
148	Electronic	BROMOPRIDE -- CLONAZEPAM	Not Specified	Major	Fair	Concurrent use of BROMOPRIDE and SEDATIVES may result in potentiation of sedative effects
148	Electronic	BROMOPRIDE -- MORPHINE SULFATE	Not Specified	Major	Fair	Concurrent use of BROMOPRIDE and OPIOID ANALGESICS may result in potentiation of sedative effects .
148	Electronic	CLONAZEPAM -- MORPHINE SULFATE	Not Specified	Major	Fair	Concurrent use of MORPHINE and CNS DEPRESSANTS may result in increased risk of respiratory and CNS depression.
148	Electronic	DIPYRONE -- ENOXAPARIN SODIUM	Not Specified	Major	Good	Concurrent use of LOW-MOLECULAR-WEIGHT HEPARINS and NSAIDS may result in an increased risk of bleeding.
148	Electronic	MORPHINE SULFATE -- ONDANSETRON	Not Specified	Major	Fair	Concurrent use of MORPHINE and SEROTONERGIC AGENTS may result in increased risk of serotonin syndrome
149	Electronic	CARVEDILOL -- DIGOXIN	Rapid	Major	Fair	Concurrent use of CARVEDILOL and DIGOXIN may result in increased digoxin concentrations; increased risk of complete heart block.
149	Electronic	DIGOXIN -- DIPYRONE	Not Specified	Major	Fair	Concurrent use of DIGOXIN and NSAIDS may result in increased serum concentration of digoxin; prolonged half-life of digoxin.
149	Electronic	DIPYRONE -- ENOXAPARIN SODIUM	Not Specified	Major	Good	Concurrent use of LOW-MOLECULAR-WEIGHT HEPARINS and NSAIDS may result in an increased risk of bleeding.
149	Electronic	CARVEDILOL -- DIPYRONE	Delayed	Moderate	Good	Concurrent use of BETA-ADRENERGIC BLOCKERS and NSAIDS may result in increased blood pressure.
149	Electronic	DIPYRONE -- ENALAPRIL MALEATE	Not Specified	Moderate	Excellent	Concurrent use of ACE INHIBITORS AND ANGIOTENSIN RECEPTOR BLOCKERS and NSAIDS may result in renal dysfunction and/ or increased blood pressure.
150	Electronic	AMITRIPTYLINE HYDROCHLORIDE -- BROMOPRIDE	Not Specified	Contraindicated	Fair	Concurrent use of BROMOPRIDE and DRUGS THAT CAUSE EXTRAPYRAMIDAL REACTIONS may result in increased risk of extrapyramidal reactions.
150	Electronic	AMITRIPTYLINE HYDROCHLORIDE -- DIPYRONE	Not Specified	Major	Excellent	Concurrent use of NSAID and TRICYCLIC ANTIDEPRESSANTS may result in an increased risk of bleeding
150	Electronic	DIPYRONE -- WARFARIN SODIUM	Not Specified	Major	Fair	Concurrent use of ANTICOAGULANTS and NSAIDS may result in increased risk of bleeding.
150	Electronic	AMITRIPTYLINE HYDROCHLORIDE -- WARFARIN SODIUM	Delayed	Moderate	Good	Concurrent use of AMITRIPTYLINE and WARFARIN may result in an increased risk of bleeding.
150	Electronic	AZATHIOPRINE -- WARFARIN SODIUM	Delayed	Moderate	Good	Concurrent use of AZATHIOPRINE and WARFARIN may result in decreased anticoagulant effectiveness.
151	Electronic	AMIODARONE HYDROCHLORIDE -- AMLODIPINE BESYLATE	Rapid	Major	Good	Concurrent use of AMIODARONE and CALCIUM CHANNEL BLOCKERS may result in bradycardia, atrioventricular block and/ or sinus arrest.
151	Electronic	AMIODARONE HYDROCHLORIDE -- TRAMADOL HYDROCHLORIDE	Not Specified	Major	Fair	Concurrent use of TRAMADOL and CYP3A4 INHIBITORS may result in increased tramadol exposure and increased risk of respiratory depression.
151	Electronic	AMIODARONE HYDROCHLORIDE -- WARFARIN SODIUM	Delayed	Major	Excellent	Concurrent use of AMIODARONE and WARFARIN may result in an increased risk of bleeding.
151	Electronic	BROMOPRIDE -- TRAMADOL HYDROCHLORIDE	Not Specified	Major	Fair	Concurrent use of BROMOPRIDE and OPIOID ANALGESICS may result in potentiation of sedative effects .
151	Electronic	DIPYRONE -- WARFARIN SODIUM	Not Specified	Major	Fair	Concurrent use of ANTICOAGULANTS and NSAIDS may result in increased risk of bleeding.
151	Electronic	DIPYRONE -- ENALAPRIL MALEATE	Not Specified	Moderate	Excellent	Concurrent use of ACE INHIBITORS AND ANGIOTENSIN RECEPTOR BLOCKERS and NSAIDS may result in renal dysfunction and/ or increased blood pressure.
151	Electronic	OMEPRAZOLE -- WARFARIN SODIUM	Delayed	Moderate	Good	Concurrent use of WARFARIN and OMEPRAZOLE may result in elevations of International Normalized Ratio serum values and potentiation of anticoagulant effects.
151	Electronic	TRAMADOL HYDROCHLORIDE -- WARFARIN SODIUM	Delayed	Moderate	Good	Concurrent use of TRAMADOL and WARFARIN may result in an increase in prothrombin time and an increased risk of bleeding.
151	Electronic	VANCOMYCIN HYDROCHLORIDE -- WARFARIN SODIUM	Delayed	Moderate	Good	Concurrent use of VANCOMYCIN and WARFARIN may result in an increased risk of bleeding.
152	Electronic	DOMPERIDONE -- FLUCONAZOLE	Not Specified	Contraindicated	Fair	Concurrent use of DOMPERIDONE and FLUCONAZOLE may result in increased domperidone exposure and an increased risk of QT prolongation.
152	Electronic	FLUCONAZOLE -- ONDANSETRON	Not Specified	Contraindicated	Fair	Concurrent use of FLUCONAZOLE and ONDANSETRON may result in an increased risk of QT interval prolongation.
152	Electronic	DIPYRONE -- HEPARIN SODIUM	Not Specified	Major	Fair	Concurrent use of ANTICOAGULANTS and NSAIDS may result in increased risk of bleeding.
152	Electronic	DOMPERIDONE -- ISONIAZID/ PYRAZINAMIDE/ RIFAMPIN	Not Specified	Major	Fair	Concurrent use of DOMPERIDONE and ISONIAZID may result in increased domperidone exposure and an increased risk of QT prolongation.
152	Electronic	DOMPERIDONE -- ONDANSETRON	Not Specified	Major	Fair	Concurrent use of DOMPERIDONE and ONDANSETRON may result in increased risk of QT interval prolongation.
152	Electronic	FLUCONAZOLE -- ISONIAZID/ PYRAZINAMIDE/ RIFAMPIN	Delayed	Moderate	Excellent	Concurrent use of FLUCONAZOLE and RIFAMPIN may result in decreased fluconazole serum concentrations and antifungal activity.
152	Electronic	FLUCONAZOLE -- OMEPRAZOLE	Rapid	Moderate	Excellent	Concurrent use of FLUCONAZOLE and OMEPRAZOLE may result in increased plasma concentrations of omeprazole.
152	Electronic	ISONIAZID/ PYRAZINAMIDE/ RIFAMPIN -- OMEPRAZOLE	Not Specified	Moderate	Fair	Concurrent use of OMEPRAZOLE and RIFAMPIN may result in decreased omeprazole plasma concentrations.
153	Electronic	BROMOPRIDE -- OLANZAPINE	Not Specified	Contraindicated	Fair	Concurrent use of BROMOPRIDE and DRUGS THAT CAUSE EXTRAPYRAMIDAL REACTIONS may result in increased risk of extrapyramidal reactions.
153	Electronic	BROMOPRIDE -- SERTRALINE HYDROCHLORIDE	Not Specified	Contraindicated	Fair	Concurrent use of BROMOPRIDE and DRUGS THAT CAUSE EXTRAPYRAMIDAL REACTIONS may result in increased risk of extrapyramidal reactions
153	Electronic	BROMOPRIDE -- DIAZEPAM	Not Specified	Major	Fair	Concurrent use of BROMOPRIDE and SEDATIVES may result in potentiation of sedative effects .
153	Electronic	BROMOPRIDE -- MORPHINE SULFATE	Not Specified	Major	Fair	Concurrent use of BROMOPRIDE and OPIOID ANALGESICS may result in potentiation of sedative effects
153	Electronic	DIAZEPAM -- MORPHINE SULFATE	Not Specified	Major	Fair	Concurrent use of MORPHINE and CNS DEPRESSANTS may result in increased risk of respiratory and CNS depression.
153	Electronic	DIAZEPAM -- OLANZAPINE	Not Specified	Major	Fair	Concurrent use of OLANZAPINE and PARENTERAL BENZODIAZEPINES may result in potentiation of excessive sedation and cardiorespiratory depression.
153	Electronic	ENOXAPARIN SODIUM -- SERTRALINE HYDROCHLORIDE	Delayed	Major	Good	Concurrent use of SERTRALINE and ANTICOAGULANTS may result in an increased risk of bleeding.
153	Electronic	MORPHINE SULFATE -- OLANZAPINE	Not Specified	Major	Fair	Concurrent use of MORPHINE and ANTICHOLINERGIC CNS DEPRESSANTS may result in increased risk of paralytic ileus; increased risk of respiratory and CNS depression.
153	Electronic	MORPHINE SULFATE -- ONDANSETRON	Not Specified	Major	Fair	Concurrent use of MORPHINE and SEROTONERGIC AGENTS may result in increased risk of serotonin syndrome
153	Electronic	MORPHINE SULFATE -- SERTRALINE HYDROCHLORIDE	Not Specified	Major	Fair	Concurrent use of MORPHINE and SEROTONERGIC AGENTS may result in increased risk of serotonin syndrome
153	Electronic	OLANZAPINE -- ONDANSETRON	Not Specified	Major	Fair	Concurrent use of ONDANSETRON and QT INTERVAL PROLONGING DRUGS may result in an increased risk of QT interval prolongation.
153	Electronic	OLANZAPINE -- SERTRALINE HYDROCHLORIDE	Not Specified	Major	Fair	Concurrent use of SERTRALINE and QT INTERVAL PROLONGING DRUGS may result in increased risk of QT-interval prolongation.
153	Electronic	ONDANSETRON -- SERTRALINE HYDROCHLORIDE	Not Specified	Major	Fair	Concurrent use of SERTRALINE and SEROTONERGIC DRUGS THAT PROLONG QT INTERVAL may result in increased risk of serotonin syndrome and increased risk of QT-interval prolongation.
153	Electronic	CLONIDINE -- OLANZAPINE	Not Specified	Moderate	Fair	Concurrent use of CLONIDINE and OLANZAPINE may result in induction or exacerbation of orthostatic regulation disturbances.
153	Electronic	HYDROCHLOROTHIAZIDE -- MORPHINE SULFATE	Not Specified	Moderate	Fair	Concurrent use of MORPHINE and DIURETICS may result in decreased efficacy of diuretics.
154	Electronic	AMIODARONE HYDROCHLORIDE -- FENTANYL	Rapid	Major	Good	Concurrent use of AMIODARONE and FENTANYL may result in cardiac toxicity (low cardiac output) and an increased risk of fentanyl toxicity (CNS depression, respiratory depression).
154	Electronic	FENTANYL -- MIDAZOLAM HYDROCHLORIDE	Not Specified	Major	Fair	Concurrent use of FENTANYL and CNS DEPRESSANTS may result in increased risk of CNS depression.
155	Electronic	DIPYRONE -- HEPARIN SODIUM	Not Specified	Major	Fair	Concurrent use of ANTICOAGULANTS and NSAIDS may result in increased risk of bleeding.
155	Electronic	CARVEDILOL -- DIPYRONE	Delayed	Moderate	Good	Concurrent use of BETA-ADRENERGIC BLOCKERS and NSAIDS may result in increased blood pressure.
155	Electronic	CARVEDILOL -- INSULIN HUMAN REGULAR	Delayed	Moderate	Good	Concurrent use of ANTIDIABETIC AGENTS and BETA-ADRENERGIC BLOCKERS may result in hypoglycemia or hyperglycemia; decreased symptoms of hypoglycemia.
155	Electronic	DIPYRONE -- ENALAPRIL MALEATE	Not Specified	Moderate	Excellent	Concurrent use of ACE INHIBITORS AND ANGIOTENSIN RECEPTOR BLOCKERS and NSAIDS may result in renal dysfunction and/ or increased blood pressure.
155	Electronic	ENALAPRIL MALEATE -- INSULIN HUMAN REGULAR	Not Specified	Moderate	Fair	Concurrent use of ACE INHIBITORS and ANTIDIABETIC AGENTS may result in increased risk of hypoglycemia.
155	Electronic	HEPARIN SODIUM -- VITAMIN A	Delayed	Moderate	Good	Concurrent use of VITAMIN A and ANTICOAGULANTS may result in increased risk of bleeding.
156	Electronic	BROMOPRIDE -- MORPHINE SULFATE	Not Specified	Major	Fair	Concurrent use of BROMOPRIDE and OPIOID ANALGESICS may result in potentiation of sedative effects .
156	Electronic	BROMOPRIDE -- TRAMADOL HYDROCHLORIDE	Not Specified	Major	Fair	Concurrent use of BROMOPRIDE and OPIOID ANALGESICS may result in potentiation of sedative effects .
156	Electronic	DIPYRONE -- ENOXAPARIN SODIUM	Not Specified	Major	Good	Concurrent use of LOW-MOLECULAR-WEIGHT HEPARINS and NSAIDS may result in an increased risk of bleeding.
156	Electronic	MORPHINE SULFATE -- ONDANSETRON	Not Specified	Major	Fair	Concurrent use of MORPHINE and SEROTONERGIC AGENTS may result in increased risk of serotonin syndrome.
156	Electronic	MORPHINE SULFATE -- TRAMADOL HYDROCHLORIDE	Not Specified	Major	Fair	Concurrent use of MORPHINE and SEROTONERGIC CNS DEPRESSANTS may result in increased risk of respiratory and CNS depression; increased risk of serotonin syndrome.
156	Electronic	ONDANSETRON -- TRAMADOL HYDROCHLORIDE	Not Specified	Major	Fair	Concurrent use of TRAMADOL and SEROTONERGIC AGENTS may result in increased risk of serotonin syndrome.
156	Electronic	RANITIDINE HYDROCHLORIDE -- TRAMADOL HYDROCHLORIDE	Not Specified	Major	Fair	Concurrent use of TRAMADOL and CYP3A4 INHIBITORS may result in increased tramadol exposure and increased risk of respiratory depression.
157	Electronic	DIPYRONE -- ENOXAPARIN SODIUM	Not Specified	Major	Good	Concurrent use of LOW-MOLECULAR-WEIGHT HEPARINS and NSAIDS may result in an increased risk of bleeding.
157	Electronic	FLUCONAZOLE -- OMEPRAZOLE	Rapid	Moderate	Excellent	Concurrent use of FLUCONAZOLE and OMEPRAZOLE may result in increased plasma concentrations of omeprazole.
158	Electronic	BROMOPRIDE -- MIDAZOLAM HYDROCHLORIDE	Not Specified	Major	Fair	Concurrent use of BROMOPRIDE and SEDATIVES may result in potentiation of sedative effects .
158	Electronic	BROMOPRIDE -- MORPHINE SULFATE	Not Specified	Major	Fair	Concurrent use of BROMOPRIDE and OPIOID ANALGESICS may result in potentiation of sedative effects .
158	Electronic	BROMOPRIDE -- SUFENTANIL CITRATE	Not Specified	Major	Fair	Concurrent use of BROMOPRIDE and OPIOID ANALGESICS may result in potentiation of sedative effects .
158	Electronic	BROMOPRIDE -- TRAMADOL HYDROCHLORIDE	Not Specified	Major	Fair	Concurrent use of BROMOPRIDE and OPIOID ANALGESICS may result in potentiation of sedative effects .
158	Electronic	CARVEDILOL -- MORPHINE SULFATE	Not Specified	Major	Fair	Concurrent use of MORPHINE and P-GLYCOPROTEIN INHIBITORS may result in increased morphine exposure.
158	Electronic	DIPYRONE -- ENOXAPARIN SODIUM	Not Specified	Major	Good	Concurrent use of LOW-MOLECULAR-WEIGHT HEPARINS and NSAIDS may result in an increased risk of bleeding.
158	Electronic	DIPYRONE -- SPIRONOLACTONE	Not Specified	Major	Good	Concurrent use of NSAIDS and POTASSIUM-SPARING DIURETICS may result in reduced diuretic effectiveness, hyperkalemia, or possible nephrotoxicity.
158	Electronic	ENALAPRIL MALEATE -- SPIRONOLACTONE	Delayed	Major	Good	Concurrent use of POTASSIUM-SPARING DIURETICS and ANGIOTENSIN CONVERTING ENZYME INHIBITORS may result in hyperkalemia.
158	Electronic	MIDAZOLAM HYDROCHLORIDE -- MORPHINE SULFATE	Not Specified	Major	Fair	Concurrent use of MORPHINE and CNS DEPRESSANTS may result in increased risk of respiratory and CNS depression.
158	Electronic	MIDAZOLAM HYDROCHLORIDE -- SUFENTANIL CITRATE	Not Specified	Major	Fair	Concurrent use of SUFENTANIL and CNS DEPRESSANTS may result in increased risk for CNS depression and hypotension.
158	Electronic	MIDAZOLAM HYDROCHLORIDE -- TRAMADOL HYDROCHLORIDE	Not Specified	Major	Fair	Concurrent use of TRAMADOL and CNS DEPRESSANTS may result in increased risk of respiratory and CNS depression.
158	Electronic	MORPHINE SULFATE -- SUFENTANIL CITRATE	Not Specified	Major	Fair	Concurrent use of MORPHINE and SEROTONERGIC CNS DEPRESSANTS may result in increased risk of respiratory and CNS depression; increased risk of serotonin syndrome.
158	Electronic	MORPHINE SULFATE -- TRAMADOL HYDROCHLORIDE	Not Specified	Major	Fair	Concurrent use of MORPHINE and SEROTONERGIC CNS DEPRESSANTS may result in increased risk of respiratory and CNS depression; increased risk of serotonin syndrome.
158	Electronic	SUFENTANIL CITRATE -- TRAMADOL HYDROCHLORIDE	Not Specified	Major	Fair	Concurrent use of TRAMADOL and SEROTONERGIC CNS DEPRESSANTS may result in increased risk of serotonin syndrome; increased risk of respiratory and CNS depression.
158	Electronic	CARVEDILOL -- DIPYRONE	Delayed	Moderate	Good	Concurrent use of BETA-ADRENERGIC BLOCKERS and NSAIDS may result in increased blood pressure.
158	Electronic	DIPYRONE -- ENALAPRIL MALEATE	Not Specified	Moderate	Excellent	Concurrent use of ACE INHIBITORS AND ANGIOTENSIN RECEPTOR BLOCKERS and NSAIDS may result in renal dysfunction and/ or increased blood pressure.
158	Electronic	FERROUS SULFATE -- LEVOTHYROXINE SODIUM	Delayed	Moderate	Good	Concurrent use of IRON and LEVOTHYROXINE may result in hypothyroidism.
158	Electronic	LEVOTHYROXINE SODIUM -- SIMETHICONE	Not Specified	Moderate	Fair	Concurrent use of LEVOTHYROXINE and SIMETHICONE may result in decreased levothyroxine efficacy.
158	Electronic	MORPHINE SULFATE -- SPIRONOLACTONE	Not Specified	Moderate	Fair	Concurrent use of MORPHINE and DIURETICS may result in decreased efficacy of diuretics.
159	Electronic	DIPYRONE -- PENTOXIFYLLINE	Not Specified	Major	Fair	Concurrent use of PENTOXIFYLLINE and NONSTEROIDAL ANTIINFLAMMATORY AGENTS may result in an increased risk of bleeding.
159	Electronic	OMEPRAZOLE -- CALCIUM PHOSPHATE, DIBASIC/ CYANOCOBALAMIN	Delayed	Minor	Good	Concurrent use of OMEPRAZOLE and CYANOCOBALAMIN may result in decreased cyanocobalamin absorption.
160	Electronic	BROMOPRIDE -- CLONAZEPAM	Not Specified	Major	Fair	Concurrent use of BROMOPRIDE and SEDATIVES may result in potentiation of sedative effects .
160	Electronic	BROMOPRIDE -- FENTANYL	Not Specified	Major	Fair	Concurrent use of BROMOPRIDE and OPIOID ANALGESICS may result in potentiation of sedative effects .
160	Electronic	BROMOPRIDE -- MORPHINE SULFATE	Not Specified	Major	Fair	Concurrent use of BROMOPRIDE and OPIOID ANALGESICS may result in potentiation of sedative effects .
160	Electronic	CLONAZEPAM -- FENTANYL	Not Specified	Major	Fair	Concurrent use of FENTANYL and CNS DEPRESSANTS may result in increased risk of CNS depression.
160	Electronic	CLONAZEPAM -- MORPHINE SULFATE	Not Specified	Major	Fair	Concurrent use of MORPHINE and CNS DEPRESSANTS may result in increased risk of respiratory and CNS depression.
160	Electronic	DEXAMETHASONE -- FENTANYL	Not Specified	Major	Excellent	Concurrent use of FENTANYL and CYP3A4 INDUCERS may result in decreased plasma concentrations of fentanyl.
160	Electronic	FENTANYL -- MORPHINE SULFATE	Not Specified	Major	Fair	Concurrent use of MORPHINE and SEROTONERGIC CNS DEPRESSANTS may result in increased risk of respiratory and CNS depression; increased risk of serotonin syndrome.
160	Electronic	FENTANYL -- ONDANSETRON	Delayed	Major	Fair	Concurrent use of FENTANYL and SEROTONERGIC AGENTS may result in increased risk of serotonin syndrome.
160	Electronic	MORPHINE SULFATE -- ONDANSETRON	Not Specified	Major	Fair	Concurrent use of MORPHINE and SEROTONERGIC AGENTS may result in increased risk of serotonin syndrome.
160	Electronic	FUROSEMIDE -- MORPHINE SULFATE	Not Specified	Moderate	Fair	Concurrent use of MORPHINE and DIURETICS may result in decreased efficacy of diuretics.
161	Electronic	BROMOPRIDE -- TRAMADOL HYDROCHLORIDE	Not Specified	Major	Fair	Concurrent use of BROMOPRIDE and OPIOID ANALGESICS may result in potentiation of sedative effects .
161	Electronic	DIPYRONE -- ENOXAPARIN SODIUM	Not Specified	Major	Good	Concurrent use of LOW-MOLECULAR-WEIGHT HEPARINS and NSAIDS may result in an increased risk of bleeding.
161	Electronic	ONDANSETRON -- TRAMADOL HYDROCHLORIDE	Not Specified	Major	Fair	Concurrent use of TRAMADOL and SEROTONERGIC AGENTS may result in increased risk of serotonin syndrome.
162	Electronic	DIPYRONE -- ENOXAPARIN SODIUM	Not Specified	Major	Good	Concurrent use of LOW-MOLECULAR-WEIGHT HEPARINS and NSAIDS may result in an increased risk of bleeding.
163	Electronic	BROMOPRIDE -- MORPHINE SULFATE	Not Specified	Major	Fair	Concurrent use of BROMOPRIDE and OPIOID ANALGESICS may result in potentiation of sedative effects .
164	Electronic	ASPIRIN -- DIPYRONE	Not Specified	Major	Excellent	Concurrent use of ASPIRIN and DIPYRONE may result in reduced efficacy of aspirin.
164	Electronic	ASPIRIN -- HEPARIN SODIUM	Not Specified	Major	Fair	Concurrent use of ANTICOAGULANTS and ANTIPLATELET AGENTS may result in increased risk of bleeding.
164	Electronic	DIPYRONE -- HEPARIN SODIUM	Not Specified	Major	Fair	Concurrent use of ANTICOAGULANTS and NSAIDS may result in increased risk of bleeding.
164	Electronic	DIPYRONE -- PREDNISONE	Not Specified	Major	Fair	Concurrent use of CORTICOSTEROIDS and NSAIDS may result in increased risk of gastrointestinal ulcer or bleeding.
164	Electronic	ASPIRIN -- INSULIN HUMAN ISOPHANE (NPH)	Not Specified	Moderate	Fair	Concurrent use of INSULIN OR PRAMLINTIDE and SALICYLATES may result in increased risk of hypoglycemia.
164	Electronic	ASPIRIN -- PREDNISONE	Delayed	Moderate	Good	Concurrent use of ASPIRIN and PREDNISONE may result in an increased risk of gastrointestinal ulceration and subtherapeutic aspirin serum concentrations.
164	Electronic	FERROUS SULFATE -- OMEPRAZOLE	Rapid	Moderate	Good	Concurrent use of IRON and OMEPRAZOLE may result in reduced non-heme iron bioavailability.
165	Electronic	DIPYRONE -- HEPARIN SODIUM	Not Specified	Major	Fair	Concurrent use of ANTICOAGULANTS and NSAIDS may result in increased risk of bleeding.
165	Electronic	MORPHINE SULFATE -- ONDANSETRON	Not Specified	Major	Fair	Concurrent use of MORPHINE and SEROTONERGIC AGENTS may result in increased risk of serotonin syndrome.
166	Electronic	ENALAPRIL MALEATE -- INSULIN HUMAN REGULAR	Not Specified	Moderate	Fair	Concurrent use of ACE INHIBITORS and ANTIDIABETIC AGENTS may result in increased risk of hypoglycemia.
167	Electronic	BROMOPRIDE -- TRAMADOL HYDROCHLORIDE	Not Specified	Major	Fair	Concurrent use of BROMOPRIDE and OPIOID ANALGESICS may result in potentiation of sedative effects .
167	Electronic	LEVOTHYROXINE SODIUM -- OMEPRAZOLE	Not Specified	Moderate	Good	Concurrent use of LEVOTHYROXINE and PROTON PUMP INHIBITORS may result in decreased levothyroxine effectiveness.
167	Electronic	OMEPRAZOLE -- CALCIUM PHOSPHATE, DIBASIC/ CYANOCOBALAMIN	Delayed	Minor	Good	Concurrent use of OMEPRAZOLE and CYANOCOBALAMIN may result in decreased cyanocobalamin absorption.
168	Electronic	BROMOPRIDE -- PROMETHAZINE HYDROCHLORIDE	Not Specified	Contraindicated	Fair	Concurrent use of BROMOPRIDE and DRUGS THAT CAUSE EXTRAPYRAMIDAL REACTIONS may result in increased risk of extrapyramidal reactions.
168	Electronic	DIPYRONE -- HEPARIN SODIUM	Not Specified	Major	Fair	Concurrent use of ANTICOAGULANTS and NSAIDS may result in increased risk of bleeding.
168	Electronic	ATENOLOL -- DIPYRONE	Delayed	Moderate	Good	Concurrent use of BETA-ADRENERGIC BLOCKERS and NSAIDS may result in increased blood pressure.
168	Electronic	CLOBAZAM -- OMEPRAZOLE	Not Specified	Moderate	Fair	Concurrent use of CLOBAZAM and OMEPRAZOLE may result in increased exposure to the active metabolite of clobazam.
168	Electronic	CLOBAZAM -- PHENYTOIN	Delayed	Moderate	Good	Concurrent use of CLOBAZAM and PHENYTOIN may result in an increased risk of phenytoin toxicity (ataxia, hyperreflexia, nystagmus, tremor).
168	Electronic	LAMOTRIGINE -- PHENYTOIN	Not Specified	Moderate	Fair	Concurrent use of LAMOTRIGINE and PHENYTOIN may result in reduced lamotrigine efficacy.
168	Electronic	OMEPRAZOLE -- PHENYTOIN	Delayed	Moderate	Fair	Concurrent use of OMEPRAZOLE and PHENYTOIN may result in an increased risk of phenytoin toxicity (ataxia, hyperreflexia, nystagmus, tremor).
168	Electronic	PHENYTOIN -- PROMETHAZINE HYDROCHLORIDE	Delayed	Minor	Good	Concurrent use of PHENYTOIN and PHENOTHIAZINES may result in increased or decreased phenytoin levels and possibly reduced phenothiazine levels.
169	Electronic	FENTANYL -- METOCLOPRAMIDE HYDROCHLORIDE	Not Specified	Major	Fair	Concurrent use of METOCLOPRAMIDE and CNS DEPRESSANTS may result in increased risk of CNS depression.
169	Electronic	FENTANYL -- MIDAZOLAM HYDROCHLORIDE	Not Specified	Major	Fair	Concurrent use of FENTANYL and CNS DEPRESSANTS may result in increased risk of CNS depression.
169	Electronic	INSULIN HUMAN REGULAR -- METOCLOPRAMIDE HYDROCHLORIDE	Not Specified	Major	Fair	Concurrent use of METOCLOPRAMIDE and INSULINS may result in risk of hyperglycemia.
169	Electronic	METOCLOPRAMIDE HYDROCHLORIDE -- MIDAZOLAM HYDROCHLORIDE	Not Specified	Major	Fair	Concurrent use of METOCLOPRAMIDE and CNS DEPRESSANTS may result in increased risk of CNS depression.
169	Electronic	MIDAZOLAM HYDROCHLORIDE -- OMEPRAZOLE	Delayed	Moderate	Fair	Concurrent use of MIDAZOLAM and OMEPRAZOLE may result in benzodiazepine toxicity (CNS depression, ataxia, lethargy).
170	Electronic	ASPIRIN -- DIPYRONE	Not Specified	Major	Excellent	Concurrent use of ASPIRIN and DIPYRONE may result in reduced efficacy of aspirin.
170	Electronic	BROMOPRIDE -- MEPERIDINE HYDROCHLORIDE	Not Specified	Major	Fair	Concurrent use of BROMOPRIDE and OPIOID ANALGESICS may result in potentiation of sedative effects .
170	Electronic	BROMOPRIDE -- MIDAZOLAM HYDROCHLORIDE	Not Specified	Major	Fair	Concurrent use of BROMOPRIDE and SEDATIVES may result in potentiation of sedative effects .
170	Electronic	BROMOPRIDE -- MORPHINE SULFATE	Not Specified	Major	Fair	Concurrent use of BROMOPRIDE and OPIOID ANALGESICS may result in potentiation of sedative effects .
170	Electronic	DIPYRONE -- ENOXAPARIN SODIUM	Not Specified	Major	Good	Concurrent use of LOW-MOLECULAR-WEIGHT HEPARINS and NSAIDS may result in an increased risk of bleeding.
170	Electronic	MEPERIDINE HYDROCHLORIDE -- MIDAZOLAM HYDROCHLORIDE	Not Specified	Major	Fair	Concurrent use of MEPERIDINE and SEDATIVES may result in increased risk of respiratory or CNS depression.
170	Electronic	MEPERIDINE HYDROCHLORIDE -- MORPHINE SULFATE	Not Specified	Major	Fair	Concurrent use of MORPHINE and SEROTONERGIC CNS DEPRESSANTS may result in increased risk of respiratory and CNS depression; increased risk of serotonin syndrome.
170	Electronic	MIDAZOLAM HYDROCHLORIDE -- MORPHINE SULFATE	Not Specified	Major	Fair	Concurrent use of MORPHINE and CNS DEPRESSANTS may result in increased risk of respiratory and CNS depression.
170	Electronic	ASPIRIN -- INSULIN HUMAN REGULAR	Not Specified	Moderate	Fair	Concurrent use of INSULIN OR PRAMLINTIDE and SALICYLATES may result in increased risk of hypoglycemia.
170	Electronic	MIDAZOLAM HYDROCHLORIDE -- OMEPRAZOLE	Delayed	Moderate	Fair	Concurrent use of MIDAZOLAM and OMEPRAZOLE may result in benzodiazepine toxicity (CNS depression, ataxia, lethargy).
171	Electronic	DIPYRONE -- ENOXAPARIN SODIUM	Not Specified	Major	Good	Concurrent use of LOW-MOLECULAR-WEIGHT HEPARINS and NSAIDS may result in an increased risk of bleeding.
171	Electronic	DIPYRONE -- HYDROCHLOROTHIAZIDE	Delayed	Major	Good	Concurrent use of NSAIDS and THIAZIDE DIURETICS may result in reduced diuretic effectiveness and possible nephrotoxicity.
171	Electronic	DIPYRONE -- LOSARTAN POTASSIUM	Not Specified	Moderate	Excellent	Concurrent use of ACE INHIBITORS AND ANGIOTENSIN RECEPTOR BLOCKERS and NSAIDS may result in renal dysfunction and/ or increased blood pressure.
172	Electronic	BROMOPRIDE -- TRAMADOL HYDROCHLORIDE	Not Specified	Major	Fair	Concurrent use of BROMOPRIDE and OPIOID ANALGESICS may result in potentiation of sedative effects .
172	Electronic	DIPYRONE -- ENOXAPARIN SODIUM	Not Specified	Major	Good	Concurrent use of LOW-MOLECULAR-WEIGHT HEPARINS and NSAIDS may result in an increased risk of bleeding.
173	Electronic	CLONIDINE -- PROPRANOLOL HYDROCHLORIDE	Not Specified	Major	Fair	Concurrent use of CLONIDINE and PROPRANOLOL may result in increased risk of sinus bradycardia; exaggerated clonidine withdrawal response (acute hypertension).
173	Electronic	DIPYRONE -- NORFLOXACIN	Delayed	Moderate	Fair	Concurrent use of NORFLOXACIN and NONSTEROIDAL ANTIINFLAMMATORY AGENTS may result in an increased risk of seizures.
173	Electronic	DIPYRONE -- PROPRANOLOL HYDROCHLORIDE	Delayed	Moderate	Good	Concurrent use of BETA-ADRENERGIC BLOCKERS and NSAIDS may result in increased blood pressure.
173	Electronic	NORFLOXACIN -- PROPRANOLOL HYDROCHLORIDE	Not Specified	Moderate	Fair	Concurrent use of PROPRANOLOL and SELECTED CYP1A2 INHIBITORS may result in increased propranolol exposure.
173	Electronic	OMEPRAZOLE -- PROPRANOLOL HYDROCHLORIDE	Not Specified	Moderate	Fair	Concurrent use of PROPRANOLOL and SELECTED CYP2C19 INHIBITORS may result in increased propranolol exposure.
174	Electronic	DIPYRONE -- ENOXAPARIN SODIUM	Not Specified	Major	Good	Concurrent use of LOW-MOLECULAR-WEIGHT HEPARINS and NSAIDS may result in an increased risk of bleeding.
174	Electronic	HALOPERIDOL -- ONDANSETRON	Not Specified	Major	Fair	Concurrent use of HALOPERIDOL and ONDANSETRON may result in an increased risk of QT interval prolongation.
174	Electronic	HALOPERIDOL -- TRAMADOL HYDROCHLORIDE	Not Specified	Major	Fair	Concurrent use of TRAMADOL and CNS DEPRESSANTS may result in increased risk of respiratory and CNS depression.
174	Electronic	ONDANSETRON -- TRAMADOL HYDROCHLORIDE	Not Specified	Major	Fair	Concurrent use of TRAMADOL and SEROTONERGIC AGENTS may result in increased risk of serotonin syndrome.
175	Electronic	BROMOPRIDE -- PAROXETINE HYDROCHLORIDE	Not Specified	Contraindicated	Fair	Concurrent use of BROMOPRIDE and DRUGS THAT CAUSE EXTRAPYRAMIDAL REACTIONS may result in increased risk of extrapyramidal reactions.
175	Electronic	BROMOPRIDE -- METHADONE HYDROCHLORIDE	Not Specified	Major	Fair	Concurrent use of BROMOPRIDE and OPIOID ANALGESICS may result in potentiation of sedative effects .
175	Electronic	CIPROFLOXACIN -- METHADONE HYDROCHLORIDE	Not Specified	Major	Fair	Concurrent use of METHADONE and CYP3A4 INHIBITORS THAT PROLONG THE QT INTERVAL may result in increased risk of QT interval prolongation; increased risk of opioid adverse effects.
175	Electronic	CIPROFLOXACIN -- PREDNISONE	Delayed	Major	Excellent	Concurrent use of SELECTED CORTICOSTEROIDS and SELECTED FLUOROQUINOLONES may result in an increased risk of tendon rupture.
175	Electronic	DIPYRONE -- ENOXAPARIN SODIUM	Not Specified	Major	Good	Concurrent use of LOW-MOLECULAR-WEIGHT HEPARINS and NSAIDS may result in an increased risk of bleeding.
175	Electronic	DIPYRONE -- PAROXETINE HYDROCHLORIDE	Not Specified	Major	Excellent	Concurrent use of NSAID and SSRI may result in an increased risk of bleeding.
175	Electronic	DIPYRONE -- PREDNISONE	Not Specified	Major	Fair	Concurrent use of CORTICOSTEROIDS and NSAIDS may result in increased risk of gastrointestinal ulcer or bleeding.
175	Electronic	ENOXAPARIN SODIUM -- PAROXETINE HYDROCHLORIDE	Delayed	Major	Good	Concurrent use of PAROXETINE and ANTICOAGULANTS may result in an increased risk of bleeding.
175	Electronic	METHADONE HYDROCHLORIDE -- PAROXETINE HYDROCHLORIDE	Rapid	Major	Fair	Concurrent use of METHADONE and SEROTONERGIC DRUGS WITH ANTICHOLINERGIC PROPERTIES THAT PROLONG THE QT INTERVAL may result in increased risk of serotonin syndrome; increased risk of paralytic ileus; increased risk of QT prolongation.
175	Electronic	METHADONE HYDROCHLORIDE -- PREDNISONE	Not Specified	Major	Fair	Concurrent use of METHADONE and CYP3A4 INDUCERS may result in increased risk of methadone withdrawal symptoms.
175	Electronic	METHADONE HYDROCHLORIDE -- RANITIDINE HYDROCHLORIDE	Not Specified	Major	Fair	Concurrent use of METHADONE and CYP3A4 INHIBITORS may result in increased risk of opioid adverse effects.
175	Electronic	CIPROFLOXACIN -- LEVOTHYROXINE SODIUM	Rapid	Moderate	Good	Concurrent use of CIPROFLOXACIN and LEVOTHYROXINE may result in decreased efficacy of levothyroxine.
175	Electronic	LEVOTHYROXINE SODIUM -- OMEPRAZOLE	Not Specified	Moderate	Good	Concurrent use of LEVOTHYROXINE and PROTON PUMP INHIBITORS may result in decreased levothyroxine effectiveness.
175	Electronic	LEVOTHYROXINE SODIUM -- PAROXETINE HYDROCHLORIDE	Not Specified	Moderate	Fair	Concurrent use of LEVOTHYROXINE and SELECTIVE SEROTONIN REUPTAKE INHIBITORS may result in increased levothyroxine requirements.
176	Electronic	DIPYRONE -- ENOXAPARIN SODIUM	Not Specified	Major	Good	Concurrent use of LOW-MOLECULAR-WEIGHT HEPARINS and NSAIDS may result in an increased risk of bleeding.
177	Electronic	None
178	Electronic	BROMOPRIDE -- OLANZAPINE	Not Specified	Contraindicated	Fair	Concurrent use of BROMOPRIDE and DRUGS THAT CAUSE EXTRAPYRAMIDAL REACTIONS may result in increased risk of extrapyramidal reactions.
178	Electronic	BROMOPRIDE -- MEPERIDINE HYDROCHLORIDE	Not Specified	Major	Fair	Concurrent use of BROMOPRIDE and OPIOID ANALGESICS may result in potentiation of sedative effects .
178	Electronic	BROMOPRIDE -- MIDAZOLAM HYDROCHLORIDE	Not Specified	Major	Fair	Concurrent use of BROMOPRIDE and SEDATIVES may result in potentiation of sedative effects .
178	Electronic	DEXAMETHASONE -- DIPYRONE	Not Specified	Major	Fair	Concurrent use of CORTICOSTEROIDS and NSAIDS may result in increased risk of gastrointestinal ulcer or bleeding.
178	Electronic	DEXAMETHASONE -- MEPERIDINE HYDROCHLORIDE	Not Specified	Major	Fair	Concurrent use of MEPERIDINE and CYP3A4 INDUCERS may result in reduced meperidine exposure.
178	Electronic	DIPYRONE -- ENOXAPARIN SODIUM	Not Specified	Major	Good	Concurrent use of LOW-MOLECULAR-WEIGHT HEPARINS and NSAIDS may result in an increased risk of bleeding.
178	Electronic	MEPERIDINE HYDROCHLORIDE -- MIDAZOLAM HYDROCHLORIDE	Not Specified	Major	Fair	Concurrent use of MEPERIDINE and SEDATIVES may result in increased risk of respiratory or CNS depression.
178	Electronic	MEPERIDINE HYDROCHLORIDE -- OLANZAPINE	Not Specified	Major	Fair	Concurrent use of ANTICHOLINERGIC CENTRAL NERVOUS SYSTEM DEPRESSANTS and MEPERIDINE may result in increased risk of respiratory and CNS depression; increased risk of paralytic ileus.
178	Electronic	MEPERIDINE HYDROCHLORIDE -- ONDANSETRON	Not Specified	Major	Fair	Concurrent use of MEPERIDINE and SEROTONERGIC AGENTS may result in increased risk of serotonin syndrome.
178	Electronic	MIDAZOLAM HYDROCHLORIDE -- OLANZAPINE	Not Specified	Major	Fair	Concurrent use of OLANZAPINE and PARENTERAL BENZODIAZEPINES may result in potentiation of excessive sedation and cardiorespiratory depression.
178	Electronic	OLANZAPINE -- ONDANSETRON	Not Specified	Major	Fair	Concurrent use of ONDANSETRON and QT INTERVAL PROLONGING DRUGS may result in an increased risk of QT interval prolongation.
179	Electronic	DIPYRONE -- HEPARIN SODIUM	Not Specified	Major	Fair	Concurrent use of ANTICOAGULANTS and NSAIDS may result in increased risk of bleeding.
180	Electronic	DIPYRONE -- ENOXAPARIN SODIUM	Not Specified	Major	Good	Concurrent use of LOW-MOLECULAR-WEIGHT HEPARINS and NSAIDS may result in an increased risk of bleeding.
181	Electronic	CEFEPIME HYDROCHLORIDE -- WARFARIN SODIUM	Not Specified	Major	Good	Concurrent use of CEFEPIME and WARFARIN may result in an increased risk of bleeding.
181	Electronic	DIPYRONE -- ENOXAPARIN SODIUM	Not Specified	Major	Good	Concurrent use of LOW-MOLECULAR-WEIGHT HEPARINS and NSAIDS may result in an increased risk of bleeding.
181	Electronic	DIPYRONE -- HYDROCHLOROTHIAZIDE	Delayed	Major	Good	Concurrent use of NSAIDS and THIAZIDE DIURETICS may result in reduced diuretic effectiveness and possible nephrotoxicity.
181	Electronic	DIPYRONE -- WARFARIN SODIUM	Not Specified	Major	Fair	Concurrent use of ANTICOAGULANTS and NSAIDS may result in increased risk of bleeding.
181	Electronic	ENOXAPARIN SODIUM -- WARFARIN SODIUM	Not Specified	Major	Fair	Concurrent use of ENOXAPARIN and WARFARIN may result in increased risk of bleeding.
181	Electronic	DIPYRONE -- ENALAPRIL MALEATE	Not Specified	Moderate	Excellent	Concurrent use of ACE INHIBITORS AND ANGIOTENSIN RECEPTOR BLOCKERS and NSAIDS may result in renal dysfunction and/ or increased blood pressure.
181	Electronic	ENALAPRIL MALEATE -- HYDROCHLOROTHIAZIDE	Rapid	Moderate	Fair	Concurrent use of ACE INHIBITORS and THIAZIDE DIURETICS may result in reduction of blood pressure.
181	Electronic	ENALAPRIL MALEATE -- INSULIN HUMAN REGULAR	Not Specified	Moderate	Fair	Concurrent use of ACE INHIBITORS and ANTIDIABETIC AGENTS may result in increased risk of hypoglycemia.
181	Electronic	WARFARIN SODIUM -- RANITIDINE HYDROCHLORIDE	Delayed	Moderate	Good	Concurrent use of RANITIDINE and WARFARIN may result in an increased risk of bleeding.
182	Electronic	AMITRIPTYLINE HYDROCHLORIDE -- DIPYRONE	Not Specified	Major	Excellent	Concurrent use of NSAID and TRICYCLIC ANTIDEPRESSANTS may result in an increased risk of bleeding.
182	Electronic	AMITRIPTYLINE HYDROCHLORIDE -- DOMPERIDONE	Not Specified	Major	Fair	Concurrent use of AMITRIPTYLINE and DOMPERIDONE may result in increased risk of QT interval prolongation.
182	Electronic	AMITRIPTYLINE HYDROCHLORIDE -- ESCITALOPRAM OXALATE	Not Specified	Major	Fair	Concurrent use of ESCITALOPRAM and QT INTERVAL-PROLONGING DRUGS may result in increased risk of QT-interval prolongation.
182	Electronic	AMITRIPTYLINE HYDROCHLORIDE -- HALOPERIDOL	Not Specified	Major	Fair	Concurrent use of TRICYCLIC ANTIDEPRESSANTS and ANTIPSYCHOTICS may result in an increased risk of cardiotoxicity (QT prolongation, torsades de pointes, cardiac arrest).
182	Electronic	AMITRIPTYLINE HYDROCHLORIDE -- LEVOTHYROXINE SODIUM	Not Specified	Major	Fair	Concurrent use of LEVOTHYROXINE and TRICYCLIC ANTIDEPRESSANTS may result in increased therapeutic and toxic effects of both levothyroxine and tricyclic antidepressant.
182	Electronic	AMITRIPTYLINE HYDROCHLORIDE -- MORPHINE SULFATE	Not Specified	Major	Fair	Concurrent use of MORPHINE and SEROTONERGIC AGENTS WITH ANTICHOLINERGIC PROPERTIES may result in increased risk of paralytic ileus; increased risk of serotonin syndrome.
182	Electronic	AMITRIPTYLINE HYDROCHLORIDE -- ONDANSETRON	Not Specified	Major	Fair	Concurrent use of AMITRIPTYLINE and ONDANSETRON may result in an increased risk of QT interval prolongation.
182	Electronic	DIPYRONE -- ENOXAPARIN SODIUM	Not Specified	Major	Good	Concurrent use of LOW-MOLECULAR-WEIGHT HEPARINS and NSAIDS may result in an increased risk of bleeding.
182	Electronic	DIPYRONE -- ESCITALOPRAM OXALATE	Not Specified	Major	Excellent	Concurrent use of NSAID and SSRI may result in an increased risk of bleeding.
182	Electronic	DOMPERIDONE -- ESCITALOPRAM OXALATE	Not Specified	Major	Fair	Concurrent use of ESCITALOPRAM and QT INTERVAL-PROLONGING DRUGS may result in increased risk of QT-interval prolongation.
182	Electronic	DOMPERIDONE -- HALOPERIDOL	Not Specified	Major	Fair	Concurrent use of DOMPERIDONE and HALOPERIDOL may result in increased risk of QT interval prolongation.
182	Electronic	DOMPERIDONE -- ONDANSETRON	Not Specified	Major	Fair	Concurrent use of DOMPERIDONE and ONDANSETRON may result in increased risk of QT interval prolongation.
182	Electronic	ENOXAPARIN SODIUM -- ESCITALOPRAM OXALATE	Not Specified	Major	Good	Concurrent use of ESCITALOPRAM and ANTICOAGULANTS may result in an increased risk of bleeding.
182	Electronic	ESCITALOPRAM OXALATE -- HALOPERIDOL	Not Specified	Major	Fair	Concurrent use of ESCITALOPRAM and QT INTERVAL-PROLONGING DRUGS may result in increased risk of QT-interval prolongation.
182	Electronic	ESCITALOPRAM OXALATE -- MORPHINE SULFATE	Not Specified	Major	Fair	Concurrent use of MORPHINE and SEROTONERGIC AGENTS may result in increased risk of serotonin syndrome.
182	Electronic	ESCITALOPRAM OXALATE -- ONDANSETRON	Not Specified	Major	Fair	Concurrent use of ONDANSETRON and QT INTERVAL PROLONGING DRUGS may result in an increased risk of QT interval prolongation.
182	Electronic	HALOPERIDOL -- MORPHINE SULFATE	Not Specified	Major	Fair	Concurrent use of MORPHINE and CNS DEPRESSANTS may result in increased risk of respiratory and CNS depression.
182	Electronic	HALOPERIDOL -- ONDANSETRON	Not Specified	Major	Fair	Concurrent use of HALOPERIDOL and ONDANSETRON may result in an increased risk of QT interval prolongation.
182	Electronic	MORPHINE SULFATE -- ONDANSETRON	Not Specified	Major	Fair	Concurrent use of MORPHINE and SEROTONERGIC AGENTS may result in increased risk of serotonin syndrome.
182	Electronic	ESCITALOPRAM OXALATE -- LEVOTHYROXINE SODIUM	Not Specified	Moderate	Fair	Concurrent use of LEVOTHYROXINE and SELECTIVE SEROTONIN REUPTAKE INHIBITORS may result in increased levothyroxine requirements.
182	Electronic	LEVOTHYROXINE SODIUM -- SIMETHICONE	Not Specified	Moderate	Fair	Concurrent use of LEVOTHYROXINE and SIMETHICONE may result in decreased levothyroxine efficacy.
183	Electronic	BROMOPRIDE -- HALOPERIDOL	Not Specified	Contraindicated	Fair	Concurrent use of BROMOPRIDE and DRUGS THAT CAUSE EXTRAPYRAMIDAL REACTIONS may result in increased risk of extrapyramidal reactions.
183	Electronic	BROMOPRIDE -- QUETIAPINE FUMARATE	Not Specified	Contraindicated	Fair	Concurrent use of BROMOPRIDE and DRUGS THAT CAUSE EXTRAPYRAMIDAL REACTIONS may result in increased risk of extrapyramidal reactions.
183	Electronic	DIPYRONE -- HEPARIN SODIUM	Not Specified	Major	Fair	Concurrent use of ANTICOAGULANTS and NSAIDS may result in increased risk of bleeding.
183	Electronic	DIPYRONE -- METHYLPREDNISOLONE	Not Specified	Major	Fair	Concurrent use of CORTICOSTEROIDS and NSAIDS may result in increased risk of gastrointestinal ulcer or bleeding.
183	Electronic	HALOPERIDOL -- QUETIAPINE FUMARATE	Not Specified	Major	Fair	Concurrent use of QUETIAPINE and QT INTERVAL PROLONGING AGENTS may result in increased risk of QT-interval prolongation.
183	Electronic	ISONIAZID/ RIFAMPIN -- QUETIAPINE FUMARATE	Not Specified	Major	Fair	Concurrent use of QUETIAPINE and STRONG CYP3A4 INDUCERS may result in decreased quetiapine exposure.
183	Electronic	HALOPERIDOL -- ISONIAZID/ RIFAMPIN	Not Specified	Moderate	Good	Concurrent use of HALOPERIDOL and RIFAMPIN may result in decreased haloperidol concentrations.
183	Electronic	ISONIAZID/ RIFAMPIN -- METHYLPREDNISOLONE	Delayed	Moderate	Good	Concurrent use of METHYLPREDNISOLONE and RIFAMPIN may result in decreased methylPREDNISolone effectiveness.
183	Electronic	ISONIAZID/ RIFAMPIN -- OMEPRAZOLE	Not Specified	Moderate	Fair	Concurrent use of OMEPRAZOLE and RIFAMPIN may result in decreased omeprazole plasma concentrations.
184	Electronic	BROMOPRIDE -- SERTRALINE HYDROCHLORIDE	Not Specified	Contraindicated	Fair	Concurrent use of BROMOPRIDE and DRUGS THAT CAUSE EXTRAPYRAMIDAL REACTIONS may result in increased risk of extrapyramidal reactions.
184	Electronic	BROMOPRIDE -- PHENOBARBITAL	Not Specified	Major	Fair	Concurrent use of BROMOPRIDE and SEDATIVES may result in potentiation of sedative effects .
184	Electronic	BROMOPRIDE -- TRAMADOL HYDROCHLORIDE	Not Specified	Major	Fair	Concurrent use of BROMOPRIDE and OPIOID ANALGESICS may result in potentiation of sedative effects .
184	Electronic	CLOBAZAM -- PHENOBARBITAL	Not Specified	Major	Good	Concurrent use of BARBITURATES and BENZODIAZEPINES may result in additive respiratory depression.
184	Electronic	CLOBAZAM -- TRAMADOL HYDROCHLORIDE	Not Specified	Major	Fair	Concurrent use of TRAMADOL and CNS DEPRESSANTS may result in increased risk of respiratory and CNS depression.
184	Electronic	DIPYRONE -- HEPARIN SODIUM	Not Specified	Major	Fair	Concurrent use of ANTICOAGULANTS and NSAIDS may result in increased risk of bleeding.
184	Electronic	DIPYRONE -- SERTRALINE HYDROCHLORIDE	Not Specified	Major	Excellent	Concurrent use of NSAID and SSRI may result in an increased risk of bleeding.
184	Electronic	HEPARIN SODIUM -- SERTRALINE HYDROCHLORIDE	Delayed	Major	Good	Concurrent use of SERTRALINE and ANTICOAGULANTS may result in an increased risk of bleeding.
184	Electronic	KETOCONAZOLE -- OMEPRAZOLE	Not Specified	Major	Fair	Concurrent use of KETOCONAZOLE and PROTON PUMP INHIBITORS may result in decreased ketoconazole exposure.
184	Electronic	KETOCONAZOLE -- SERTRALINE HYDROCHLORIDE	Not Specified	Major	Fair	Concurrent use of SERTRALINE and QT INTERVAL PROLONGING DRUGS may result in increased risk of QT-interval prolongation.
184	Electronic	KETOCONAZOLE -- TRAMADOL HYDROCHLORIDE	Not Specified	Major	Fair	Concurrent use of TRAMADOL and CYP3A4 INHIBITORS may result in increased tramadol exposure and increased risk of respiratory depression.
184	Electronic	PHENOBARBITAL -- TRAMADOL HYDROCHLORIDE	Not Specified	Major	Fair	Concurrent use of TRAMADOL and PHENOBARBITAL may result in increased risk of CNS depression and decreased plasma concentrations of tramadol.
184	Electronic	SERTRALINE HYDROCHLORIDE -- TRAMADOL HYDROCHLORIDE	Not Specified	Major	Fair	Concurrent use of TRAMADOL and SEROTONERGIC CYP2D6 INHIBITORS may result in increased tramadol exposure and reduced concentrations of the active metabolite.
184	Electronic	TOPIRAMATE -- TRAMADOL HYDROCHLORIDE	Not Specified	Major	Fair	Concurrent use of TRAMADOL and CNS DEPRESSANTS may result in increased risk of respiratory and CNS depression.
184	Electronic	CLOBAZAM -- KETOCONAZOLE	Not Specified	Moderate	Excellent	Concurrent use of CLOBAZAM and KETOCONAZOLE may result in increased systemic exposure to clobazam.
184	Electronic	CLOBAZAM -- OMEPRAZOLE	Not Specified	Moderate	Fair	Concurrent use of CLOBAZAM and OMEPRAZOLE may result in increased exposure to the active metabolite of clobazam.
184	Electronic	LAMOTRIGINE -- PHENOBARBITAL	Not Specified	Moderate	Good	Concurrent use of PHENOBARBITAL and LAMOTRIGINE may result in reduced lamotrigine efficacy, loss of seizure control.
184	Electronic	LAMOTRIGINE -- SERTRALINE HYDROCHLORIDE	Delayed	Moderate	Good	Concurrent use of LAMOTRIGINE and SERTRALINE may result in an increased risk of lamotrigine toxicity (fatigue, sedation, confusion, decreased cognition).
184	Electronic	PHENOBARBITAL -- TOPIRAMATE	Delayed	Moderate	Good	Concurrent use of PHENOBARBITAL and TOPIRAMATE may result in a decrease in serum concentrations of topiramate.
185	Electronic	BROMOPRIDE -- MIRTAZAPINE	Not Specified	Contraindicated	Fair	Concurrent use of BROMOPRIDE and DRUGS THAT CAUSE EXTRAPYRAMIDAL REACTIONS may result in increased risk of extrapyramidal reactions.
185	Electronic	DIPYRONE -- ENOXAPARIN SODIUM	Not Specified	Major	Good	Concurrent use of LOW-MOLECULAR-WEIGHT HEPARINS and NSAIDS may result in an increased risk of bleeding.
186	Electronic	DIPYRONE -- ENOXAPARIN SODIUM	Not Specified	Major	Good	Concurrent use of LOW-MOLECULAR-WEIGHT HEPARINS and NSAIDS may result in an increased risk of bleeding.
187	Electronic	ASPIRIN -- DIPYRONE	Not Specified	Major	Excellent	Concurrent use of ASPIRIN and DIPYRONE may result in reduced efficacy of aspirin.
187	Electronic	BROMOPRIDE -- TRAMADOL HYDROCHLORIDE	Not Specified	Major	Fair	Concurrent use of BROMOPRIDE and OPIOID ANALGESICS may result in potentiation of sedative effects .
187	Electronic	DIPYRONE -- ENOXAPARIN SODIUM	Not Specified	Major	Good	Concurrent use of LOW-MOLECULAR-WEIGHT HEPARINS and NSAIDS may result in an increased risk of bleeding.
187	Electronic	ASPIRIN -- CALCIUM PHOSPHATE, TRIBASIC/ CHOLECALCIFEROL/ DICALCIUM MALATE DIHYDROXIDE/ GENISTEIN/ MENATETRENONE/ PHOSPHATE/ ZINC, CHELATED	Delayed	Moderate	Fair	Concurrent use of ASPIRIN and ALUMINUM, CALCIUM OR MAGNESIUM CONTAINING PRODUCTS may result in decreased salicylate effectiveness.
187	Electronic	LEVOTHYROXINE SODIUM -- OMEPRAZOLE	Not Specified	Moderate	Good	Concurrent use of LEVOTHYROXINE and PROTON PUMP INHIBITORS may result in decreased levothyroxine effectiveness.
187	Electronic	CYANOCOBALAMIN/ PYRIDOXINE/ THIAMINE -- OMEPRAZOLE	Delayed	Minor	Good	Concurrent use of OMEPRAZOLE and CYANOCOBALAMIN may result in decreased cyanocobalamin absorption.
188	Electronic	DIPYRONE -- HEPARIN SODIUM	Not Specified	Major	Fair	Concurrent use of ANTICOAGULANTS and NSAIDS may result in increased risk of bleeding.
188	Electronic	DIPYRONE -- HYDROCHLOROTHIAZIDE	Delayed	Major	Good	Concurrent use of NSAIDS and THIAZIDE DIURETICS may result in reduced diuretic effectiveness and possible nephrotoxicity.
188	Electronic	DIPYRONE -- PREDNISONE	Not Specified	Major	Fair	Concurrent use of CORTICOSTEROIDS and NSAIDS may result in increased risk of gastrointestinal ulcer or bleeding.
188	Electronic	ATENOLOL -- DIPYRONE	Delayed	Moderate	Good	Concurrent use of BETA-ADRENERGIC BLOCKERS and NSAIDS may result in increased blood pressure.
188	Electronic	DIPYRONE -- LOSARTAN POTASSIUM	Not Specified	Moderate	Excellent	Concurrent use of ACE INHIBITORS AND ANGIOTENSIN RECEPTOR BLOCKERS and NSAIDS may result in renal dysfunction and/ or increased blood pressure.
188	Electronic	HYDROCHLOROTHIAZIDE -- PREDNISONE	Delayed	Moderate	Fair	Concurrent use of HYDROCHLOROTHIAZIDE and PREDNISONE may result in hypokalemia and subsequent cardiac arrhythmias.
189	Electronic	ASPIRIN -- DIPYRONE	Not Specified	Major	Excellent	Concurrent use of ASPIRIN and DIPYRONE may result in reduced efficacy of aspirin.
189	Electronic	ASPIRIN -- HEPARIN SODIUM	Not Specified	Major	Fair	Concurrent use of ANTICOAGULANTS and ANTIPLATELET AGENTS may result in increased risk of bleeding.
189	Electronic	ASPIRIN -- INDAPAMIDE	Delayed	Major	Good	Concurrent use of NSAIDS and THIAZIDE DIURETICS may result in reduced diuretic effectiveness and possible nephrotoxicity.
189	Electronic	DIPYRONE -- HEPARIN SODIUM	Not Specified	Major	Fair	Concurrent use of ANTICOAGULANTS and NSAIDS may result in increased risk of bleeding.
189	Electronic	DIPYRONE -- INDAPAMIDE	Delayed	Major	Good	Concurrent use of NSAIDS and THIAZIDE DIURETICS may result in reduced diuretic effectiveness and possible nephrotoxicity.
189	Electronic	DOMPERIDONE -- GALANTAMINE HYDROBROMIDE	Not Specified	Major	Fair	Concurrent use of DOMPERIDONE and GALANTAMINE may result in increased risk of QT interval prolongation.
189	Electronic	DOMPERIDONE -- ONDANSETRON	Not Specified	Major	Fair	Concurrent use of DOMPERIDONE and ONDANSETRON may result in increased risk of QT interval prolongation.
189	Electronic	GALANTAMINE HYDROBROMIDE -- ONDANSETRON	Not Specified	Major	Fair	Concurrent use of ONDANSETRON and QT INTERVAL PROLONGING DRUGS may result in an increased risk of QT interval prolongation.
189	Electronic	ONDANSETRON -- TRAMADOL HYDROCHLORIDE	Not Specified	Major	Fair	Concurrent use of TRAMADOL and SEROTONERGIC AGENTS may result in increased risk of serotonin syndrome.
190	Electronic	DIPYRONE -- HEPARIN SODIUM	Not Specified	Major	Fair	Concurrent use of ANTICOAGULANTS and NSAIDS may result in increased risk of bleeding.
190	Electronic	METRONIDAZOLE -- ONDANSETRON	Not Specified	Major	Fair	Concurrent use of METRONIDAZOLE and QT INTERVAL PROLONGING DRUGS may result in increased risk of QT-interval prolongation and arrhythmias.
191	Electronic	LORAZEPAM -- METOCLOPRAMIDE HYDROCHLORIDE	Not Specified	Major	Fair	Concurrent use of METOCLOPRAMIDE and CNS DEPRESSANTS may result in increased risk of CNS depression.
192	Electronic	DIPYRONE -- ENOXAPARIN SODIUM	Not Specified	Major	Good	Concurrent use of LOW-MOLECULAR-WEIGHT HEPARINS and NSAIDS may result in an increased risk of bleeding.
192	Electronic	MORPHINE SULFATE -- ONDANSETRON	Not Specified	Major	Fair	Concurrent use of MORPHINE and SEROTONERGIC AGENTS may result in increased risk of serotonin syndrome.
193	Electronic	DIPYRONE -- ENOXAPARIN SODIUM	Not Specified	Major	Good	Concurrent use of LOW-MOLECULAR-WEIGHT HEPARINS and NSAIDS may result in an increased risk of bleeding.
193	Electronic	IRON -- OMEPRAZOLE	Rapid	Moderate	Good	Concurrent use of IRON and OMEPRAZOLE may result in reduced non-heme iron bioavailability.
194	Electronic	None
195	Electronic	AMITRIPTYLINE HYDROCHLORIDE -- BROMOPRIDE	Not Specified	Contraindicated	Fair	Concurrent use of BROMOPRIDE and DRUGS THAT CAUSE EXTRAPYRAMIDAL REACTIONS may result in increased risk of extrapyramidal reactions.
195	Electronic	AMITRIPTYLINE HYDROCHLORIDE -- DIPYRONE	Not Specified	Major	Excellent	Concurrent use of NSAID and TRICYCLIC ANTIDEPRESSANTS may result in an increased risk of bleeding.
195	Electronic	BROMAZEPAM -- BROMOPRIDE	Not Specified	Major	Fair	Concurrent use of BROMOPRIDE and SEDATIVES may result in potentiation of sedative effects .
196	Electronic	DIPYRONE -- FUROSEMIDE	Not Specified	Major	Good	Concurrent use of LOOP DIURETICS and NSAIDS may result in reduced diuretic effectiveness and possible nephrotoxicity.
196	Electronic	CARVEDILOL -- DIPYRONE	Delayed	Moderate	Good	Concurrent use of BETA-ADRENERGIC BLOCKERS and NSAIDS may result in increased blood pressure.
197	Electronic	INSULIN HUMAN ISOPHANE (NPH) -- INSULIN HUMAN REGULAR	Unknown	Unknown	Unknown	An ingredient duplication has occurred. The ingredient INSULIN HUMAN ISOPHANE (NPH) has been duplicated in the following products: INSULIN HUMAN ISOPHANE (NPH) and INSULIN HUMAN REGULAR.
198	Electronic	POTASSIUM CHLORIDE -- SCOPOLAMINE	Rapid	Contraindicated	Fair	Concurrent use of POTASSIUM and SCOPOLAMINE may result in risk of gastrointestinal lesions.
198	Electronic	AMIKACIN SULFATE -- FUROSEMIDE	Not Specified	Major	Fair	Concurrent use of AMIKACIN and FUROSEMIDE may result in increased amikacin plasma and tissue concentrations and additive ototoxicity and/ or nephrotoxicity.
198	Electronic	AMIKACIN SULFATE -- VANCOMYCIN HYDROCHLORIDE	Not Specified	Major	Fair	Concurrent use of AMIKACIN and VANCOMYCIN may result in additive ototoxicity and/ or nephrotoxicity.
198	Electronic	BROMOPRIDE -- FENTANYL	Not Specified	Major	Fair	Concurrent use of BROMOPRIDE and OPIOID ANALGESICS may result in potentiation of sedative effects .
198	Electronic	DIPYRONE -- FUROSEMIDE	Not Specified	Major	Good	Concurrent use of LOOP DIURETICS and NSAIDS may result in reduced diuretic effectiveness and possible nephrotoxicity.
198	Electronic	DIPYRONE -- HEPARIN SODIUM	Not Specified	Major	Fair	Concurrent use of ANTICOAGULANTS and NSAIDS may result in increased risk of bleeding.
198	Electronic	DIPYRONE -- PREDNISONE	Not Specified	Major	Fair	Concurrent use of CORTICOSTEROIDS and NSAIDS may result in increased risk of gastrointestinal ulcer or bleeding.
198	Electronic	DIPYRONE -- RIVAROXABAN	Not Specified	Major	Fair	Concurrent use of ANTICOAGULANTS and NSAIDS may result in increased risk of bleeding.
198	Electronic	FENTANYL -- ONDANSETRON	Delayed	Major	Fair	Concurrent use of FENTANYL and SEROTONERGIC AGENTS may result in increased risk of serotonin syndrome.
198	Electronic	FENTANYL -- PREDNISONE	Not Specified	Major	Excellent	Concurrent use of FENTANYL and CYP3A4 INDUCERS may result in decreased plasma concentrations of fentanyl.
198	Electronic	HEPARIN SODIUM -- RIVAROXABAN	Not Specified	Major	Fair	Concurrent use of HEPARIN and RIVAROXABAN may result in an increased risk of bleeding.
198	Electronic	HYDROXYCHLOROQUINE SULFATE -- ONDANSETRON	Not Specified	Major	Good	Concurrent use of HYDROXYCHLOROQUINE and QT PROLONGING AGENTS may result in increased risk of QT-interval prolongation.
198	Electronic	HEPARIN SODIUM -- VITAMIN A/ VITAMIN D	Delayed	Moderate	Good	Concurrent use of VITAMIN A and ANTICOAGULANTS may result in increased risk of bleeding.
198	Electronic	LEVOTHYROXINE SODIUM -- OMEPRAZOLE	Not Specified	Moderate	Good	Concurrent use of LEVOTHYROXINE and PROTON PUMP INHIBITORS may result in decreased levothyroxine effectiveness.
198	Electronic	LEVOTHYROXINE SODIUM -- SIMETHICONE	Not Specified	Moderate	Fair	Concurrent use of LEVOTHYROXINE and SIMETHICONE may result in decreased levothyroxine efficacy.
199	Electronic	BROMOPRIDE -- MORPHINE SULFATE	Not Specified	Major	Fair	Concurrent use of BROMOPRIDE and OPIOID ANALGESICS may result in potentiation of sedative effects .
199	Electronic	BROMOPRIDE -- TRAMADOL HYDROCHLORIDE	Not Specified	Major	Fair	Concurrent use of BROMOPRIDE and OPIOID ANALGESICS may result in potentiation of sedative effects .
199	Electronic	DIPYRONE -- ENOXAPARIN SODIUM	Not Specified	Major	Good	Concurrent use of LOW-MOLECULAR-WEIGHT HEPARINS and NSAIDS may result in an increased risk of bleeding.
199	Electronic	DIPYRONE -- METHYLPREDNISOLONE	Not Specified	Major	Fair	Concurrent use of CORTICOSTEROIDS and NSAIDS may result in increased risk of gastrointestinal ulcer or bleeding.
199	Electronic	DIPYRONE -- PENTOXIFYLLINE	Not Specified	Major	Fair	Concurrent use of PENTOXIFYLLINE and NONSTEROIDAL ANTIINFLAMMATORY AGENTS may result in an increased risk of bleeding.
199	Electronic	MORPHINE SULFATE -- TRAMADOL HYDROCHLORIDE	Not Specified	Major	Fair	Concurrent use of MORPHINE and SEROTONERGIC CNS DEPRESSANTS may result in increased risk of respiratory and CNS depression; increased risk of serotonin syndrome.
199	Electronic	NIFEDIPINE -- PHENYTOIN	Not Specified	Major	Good	Concurrent use of NIFEDIPINE and CYP3A4 INDUCERS may result in decreased NIFEdipine exposure.
199	Electronic	PHENYTOIN -- TRAMADOL HYDROCHLORIDE	Not Specified	Major	Fair	Concurrent use of TRAMADOL and CYP3A4 INDUCERS may result in reduced tramadol exposure.
199	Electronic	METHYLPREDNISOLONE -- PHENYTOIN	Delayed	Moderate	Fair	Concurrent use of METHYLPREDNISOLONE and PHENYTOIN may result in decreased methylPREDNISolone effectiveness.
199	Electronic	OMEPRAZOLE -- PHENYTOIN	Delayed	Moderate	Fair	Concurrent use of OMEPRAZOLE and PHENYTOIN may result in an increased risk of phenytoin toxicity (ataxia, hyperreflexia, nystagmus, tremor).
200	Electronic	ASPIRIN -- DIPYRONE	Not Specified	Major	Excellent	Concurrent use of ASPIRIN and DIPYRONE may result in reduced efficacy of aspirin.
200	Electronic	ASPIRIN -- CARVEDILOL	Delayed	Moderate	Good	Concurrent use of BETA-ADRENERGIC BLOCKERS and NSAIDS may result in increased blood pressure.
200	Electronic	CARVEDILOL -- DIPYRONE	Delayed	Moderate	Good	Concurrent use of BETA-ADRENERGIC BLOCKERS and NSAIDS may result in increased blood pressure.
201	Electronic	BROMOPRIDE -- CLOZAPINE	Not Specified	Contraindicated	Fair	Concurrent use of BROMOPRIDE and DRUGS THAT CAUSE EXTRAPYRAMIDAL REACTIONS may result in increased risk of extrapyramidal reactions.
201	Electronic	BROMOPRIDE -- DIAZEPAM	Not Specified	Major	Fair	Concurrent use of BROMOPRIDE and SEDATIVES may result in potentiation of sedative effects .
201	Electronic	CARBAMAZEPINE -- CLOZAPINE	Delayed	Major	Fair	Concurrent use of CLOZAPINE and STRONG CYP3A4 INDUCERS may result in reduced clozapine exposure and decreased efficacy.
201	Electronic	CARBAMAZEPINE -- TOPIRAMATE	Delayed	Moderate	Good	Concurrent use of CARBAMAZEPINE and TOPIRAMATE may result in decreased topiramate concentrations.
201	Electronic	CARBAMAZEPINE -- VALPROIC ACID	Not Specified	Moderate	Good	Concurrent use of CARBAMAZEPINE and VALPROIC ACID may result in carbamazepine toxicity (ataxia, nystagmus, diplopia, headache, vomiting, apnea, seizures, coma) and/ or decreased valproic acid effectiveness.
201	Electronic	TOPIRAMATE -- VALPROIC ACID	Not Specified	Moderate	Good	Concurrent use of TOPIRAMATE and VALPROIC ACID may result in decreased topiramate or valproic acid concentrations and increased risk of hyperammonemia, encephalopathy, and hypothermia.
201	Electronic	CARBAMAZEPINE -- CLOBAZAM	Delayed	Minor	Good	Concurrent use of CLOBAZAM and CARBAMAZEPINE may result in decreased carbamazepine parent drug and/ or increased active metabolite concentrations.
202	Electronic	ASPIRIN -- DIPYRONE	Not Specified	Major	Excellent	Concurrent use of ASPIRIN and DIPYRONE may result in reduced efficacy of aspirin.
202	Electronic	ASPIRIN -- FUROSEMIDE	Not Specified	Major	Good	Concurrent use of LOOP DIURETICS and NSAIDS may result in reduced diuretic effectiveness and possible nephrotoxicity.
202	Electronic	ASPIRIN -- SPIRONOLACTONE	Not Specified	Major	Good	Concurrent use of NSAIDS and POTASSIUM-SPARING DIURETICS may result in reduced diuretic effectiveness, hyperkalemia, or possible nephrotoxicity.
202	Electronic	BROMOPRIDE -- MORPHINE SULFATE	Not Specified	Major	Fair	Concurrent use of BROMOPRIDE and OPIOID ANALGESICS may result in potentiation of sedative effects .
202	Electronic	DIPYRONE -- ENOXAPARIN SODIUM	Not Specified	Major	Good	Concurrent use of LOW-MOLECULAR-WEIGHT HEPARINS and NSAIDS may result in an increased risk of bleeding.
202	Electronic	DIPYRONE -- FUROSEMIDE	Not Specified	Major	Good	Concurrent use of LOOP DIURETICS and NSAIDS may result in reduced diuretic effectiveness and possible nephrotoxicity.
202	Electronic	DIPYRONE -- SPIRONOLACTONE	Not Specified	Major	Good	Concurrent use of NSAIDS and POTASSIUM-SPARING DIURETICS may result in reduced diuretic effectiveness, hyperkalemia, or possible nephrotoxicity.
202	Electronic	ENALAPRIL MALEATE -- SPIRONOLACTONE	Delayed	Major	Good	Concurrent use of POTASSIUM-SPARING DIURETICS and ANGIOTENSIN CONVERTING ENZYME INHIBITORS may result in hyperkalemia.
202	Electronic	ASPIRIN -- ENALAPRIL MALEATE	Rapid	Moderate	Excellent	Concurrent use of ASPIRIN and ENALAPRIL may result in decreased effectiveness of enalapril.
202	Electronic	DIPYRONE -- ENALAPRIL MALEATE	Not Specified	Moderate	Excellent	Concurrent use of ACE INHIBITORS AND ANGIOTENSIN RECEPTOR BLOCKERS and NSAIDS may result in renal dysfunction and/ or increased blood pressure.
202	Electronic	ENALAPRIL MALEATE -- FUROSEMIDE	Rapid	Moderate	Good	Concurrent use of ANGIOTENSIN CONVERTING ENZYME INHIBITORS and LOOP DIURETICS may result in postural hypotension (first dose).
202	Electronic	FUROSEMIDE -- MORPHINE SULFATE	Not Specified	Moderate	Fair	Concurrent use of MORPHINE and DIURETICS may result in decreased efficacy of diuretics.
202	Electronic	MORPHINE SULFATE -- SPIRONOLACTONE	Not Specified	Moderate	Fair	Concurrent use of MORPHINE and DIURETICS may result in decreased efficacy of diuretics.
203	Electronic	DEXAMETHASONE -- DIPYRONE	Not Specified	Major	Fair	Concurrent use of CORTICOSTEROIDS and NSAIDS may result in increased risk of gastrointestinal ulcer or bleeding.
203	Electronic	DIPYRONE -- ENOXAPARIN SODIUM	Not Specified	Major	Good	Concurrent use of LOW-MOLECULAR-WEIGHT HEPARINS and NSAIDS may result in an increased risk of bleeding.
203	Electronic	ONDANSETRON -- PALONOSETRON HYDROCHLORIDE	Not Specified	Major	Fair	Concurrent use of PALONOSETRON and SEROTONERGIC AGENTS may result in increased risk of serotonin syndrome.
204	Electronic	BROMOPRIDE -- DIAZEPAM	Not Specified	Major	Fair	Concurrent use of BROMOPRIDE and SEDATIVES may result in potentiation of sedative effects .
204	Electronic	BROMOPRIDE -- TRAMADOL HYDROCHLORIDE	Not Specified	Major	Fair	Concurrent use of BROMOPRIDE and OPIOID ANALGESICS may result in potentiation of sedative effects .
204	Electronic	CLOBAZAM -- TRAMADOL HYDROCHLORIDE	Not Specified	Major	Fair	Concurrent use of TRAMADOL and CNS DEPRESSANTS may result in increased risk of respiratory and CNS depression.
204	Electronic	DIAZEPAM -- TRAMADOL HYDROCHLORIDE	Not Specified	Major	Fair	Concurrent use of TRAMADOL and CNS DEPRESSANTS may result in increased risk of respiratory and CNS depression.
204	Electronic	DIPYRONE -- PREDNISONE	Not Specified	Major	Fair	Concurrent use of CORTICOSTEROIDS and NSAIDS may result in increased risk of gastrointestinal ulcer or bleeding.
204	Electronic	PREDNISONE -- TRAMADOL HYDROCHLORIDE	Not Specified	Major	Fair	Concurrent use of TRAMADOL and CYP3A4 INDUCERS may result in reduced tramadol exposure.
204	Electronic	BEZAFIBRATE -- INSULIN HUMAN REGULAR	Not Specified	Moderate	Fair	Concurrent use of FIBRATES and INSULINS OR PRAMLINTIDE may result in increased risk of hypoglycemia.
204	Electronic	CLOBAZAM -- OMEPRAZOLE	Not Specified	Moderate	Fair	Concurrent use of CLOBAZAM and OMEPRAZOLE may result in increased exposure to the active metabolite of clobazam.
204	Electronic	DIAZEPAM -- OMEPRAZOLE	Delayed	Minor	Good	Concurrent use of OMEPRAZOLE and DIAZEPAM may result in enhanced and prolonged diazepam effects.
205	Electronic	BROMOPRIDE -- QUETIAPINE FUMARATE	Not Specified	Contraindicated	Fair	Concurrent use of BROMOPRIDE and DRUGS THAT CAUSE EXTRAPYRAMIDAL REACTIONS may result in increased risk of extrapyramidal reactions.
205	Electronic	DIPYRONE -- FUROSEMIDE	Not Specified	Major	Good	Concurrent use of LOOP DIURETICS and NSAIDS may result in reduced diuretic effectiveness and possible nephrotoxicity.
206	Electronic	BROMOPRIDE -- MORPHINE SULFATE	Not Specified	Major	Fair	Concurrent use of BROMOPRIDE and OPIOID ANALGESICS may result in potentiation of sedative effects .
206	Electronic	DIPYRONE -- ENOXAPARIN SODIUM	Not Specified	Major	Good	Concurrent use of LOW-MOLECULAR-WEIGHT HEPARINS and NSAIDS may result in an increased risk of bleeding.
207	Electronic	AMITRIPTYLINE HYDROCHLORIDE -- BROMOPRIDE	Not Specified	Contraindicated	Fair	Concurrent use of BROMOPRIDE and DRUGS THAT CAUSE EXTRAPYRAMIDAL REACTIONS may result in increased risk of extrapyramidal reactions.
207	Electronic	AMITRIPTYLINE HYDROCHLORIDE -- KETOPROFEN	Not Specified	Major	Excellent	Concurrent use of NSAID and TRICYCLIC ANTIDEPRESSANTS may result in an increased risk of bleeding.
207	Electronic	AMITRIPTYLINE HYDROCHLORIDE -- TRAMADOL HYDROCHLORIDE	Not Specified	Major	Fair	Concurrent use of TRAMADOL and SEROTONERGIC AGENTS WITH ANTICHOLINERGIC PROPERTIES may result in increased risk of paralytic ileus; increased risk of serotonin syndrome.
207	Electronic	BROMOPRIDE -- TRAMADOL HYDROCHLORIDE	Not Specified	Major	Fair	Concurrent use of BROMOPRIDE and OPIOID ANALGESICS may result in potentiation of sedative effects .
207	Electronic	ENOXAPARIN SODIUM -- KETOPROFEN	Not Specified	Major	Good	Concurrent use of LOW-MOLECULAR-WEIGHT HEPARINS and NSAIDS may result in an increased risk of bleeding.
207	Electronic	LIDOCAINE -- PROPRANOLOL HYDROCHLORIDE	Rapid	Major	Good	Concurrent use of LIDOCAINE and PROPRANOLOL may result in increased lidocaine toxicity.
207	Electronic	AMITRIPTYLINE HYDROCHLORIDE -- PROPRANOLOL HYDROCHLORIDE	Not Specified	Moderate	Fair	Concurrent use of AMITRIPTYLINE and PROPRANOLOL may result in increased propranolol exposure; increased risk of postural hypotension.
207	Electronic	KETOPROFEN -- PROPRANOLOL HYDROCHLORIDE	Delayed	Moderate	Good	Concurrent use of BETA-ADRENERGIC BLOCKERS and NSAIDS may result in increased blood pressure.
207	Electronic	OMEPRAZOLE -- PROPRANOLOL HYDROCHLORIDE	Not Specified	Moderate	Fair	Concurrent use of PROPRANOLOL and SELECTED CYP2C19 INHIBITORS may result in increased propranolol exposure.
208	Electronic	DIPYRONE -- ENOXAPARIN SODIUM	Not Specified	Major	Good	Concurrent use of LOW-MOLECULAR-WEIGHT HEPARINS and NSAIDS may result in an increased risk of bleeding.
209	Electronic	AMLODIPINE BESYLATE -- CLOPIDOGREL HYDROGEN SULFATE	Not Specified	Major	Excellent	Concurrent use of AMLODIPINE and CLOPIDOGREL may result in decreased antiplatelet effect and increased risk of thrombotic events.
209	Electronic	ASPIRIN -- CLOPIDOGREL HYDROGEN SULFATE	Not Specified	Major	Fair	Concurrent use of ASPIRIN and CLOPIDOGREL may result in an increased risk of bleeding.
209	Electronic	ASPIRIN -- DIPYRONE	Not Specified	Major	Excellent	Concurrent use of ASPIRIN and DIPYRONE may result in reduced efficacy of aspirin.
209	Electronic	ASPIRIN -- HEPARIN SODIUM	Not Specified	Major	Fair	Concurrent use of ANTICOAGULANTS and ANTIPLATELET AGENTS may result in increased risk of bleeding.
209	Electronic	CLOPIDOGREL HYDROGEN SULFATE -- DIPYRONE	Not Specified	Major	Fair	Concurrent use of ANTIPLATELET AGENTS and NSAIDS may result in increased risk of bleeding.
209	Electronic	CLOPIDOGREL HYDROGEN SULFATE -- HEPARIN SODIUM	Not Specified	Major	Fair	Concurrent use of ANTICOAGULANTS and ANTIPLATELET AGENTS may result in increased risk of bleeding.
209	Electronic	CLOPIDOGREL HYDROGEN SULFATE -- OMEPRAZOLE	Rapid	Major	Excellent	Concurrent use of CLOPIDOGREL and OMEPRAZOLE may result in reduced plasma concentrations of clopidogrel active metabolite and reduced antiplatelet activity.
209	Electronic	DIPYRONE -- HEPARIN SODIUM	Not Specified	Major	Fair	Concurrent use of ANTICOAGULANTS and NSAIDS may result in increased risk of bleeding.
209	Electronic	ASPIRIN -- ATENOLOL	Delayed	Moderate	Good	Concurrent use of BETA-ADRENERGIC BLOCKERS and NSAIDS may result in increased blood pressure.
209	Electronic	ASPIRIN -- VALPROIC ACID	Delayed	Moderate	Good	Concurrent use of ASPIRIN and VALPROIC ACID may result in increased free valproic acid concentrations.
209	Electronic	ATENOLOL -- DIPYRONE	Delayed	Moderate	Good	Concurrent use of BETA-ADRENERGIC BLOCKERS and NSAIDS may result in increased blood pressure.
209	Electronic	ATORVASTATIN CALCIUM -- CLOPIDOGREL HYDROGEN SULFATE	Not Specified	Moderate	Excellent	Concurrent use of CLOPIDOGREL and CYP3A4 METABOLIZED STATINS may result in decreased formation of clopidogrel active metabolite resulting in high on-treatment platelet reactivity.
210	Electronic	ASPIRIN -- CLOPIDOGREL HYDROGEN SULFATE	Not Specified	Major	Fair	Concurrent use of ASPIRIN and CLOPIDOGREL may result in an increased risk of bleeding.
210	Electronic	ASPIRIN -- DIPYRONE	Not Specified	Major	Excellent	Concurrent use of ASPIRIN and DIPYRONE may result in reduced efficacy of aspirin.
210	Electronic	CHLORPROMAZINE -- ONDANSETRON	Not Specified	Major	Fair	Concurrent use of CHLORPROMAZINE and ONDANSETRON may result in an increased risk of QT interval prolongation.
210	Electronic	CLOPIDOGREL HYDROGEN SULFATE -- DIPYRONE	Not Specified	Major	Fair	Concurrent use of ANTIPLATELET AGENTS and NSAIDS may result in increased risk of bleeding.
210	Electronic	ASPIRIN -- BISOPROLOL FUMARATE	Delayed	Moderate	Good	Concurrent use of BETA-ADRENERGIC BLOCKERS and NSAIDS may result in increased blood pressure.
210	Electronic	ASPIRIN -- INSULIN HUMAN REGULAR	Not Specified	Moderate	Fair	Concurrent use of INSULIN OR PRAMLINTIDE and SALICYLATES may result in increased risk of hypoglycemia.
210	Electronic	BISOPROLOL FUMARATE -- DIPYRONE	Delayed	Moderate	Good	Concurrent use of BETA-ADRENERGIC BLOCKERS and NSAIDS may result in increased blood pressure.
210	Electronic	BISOPROLOL FUMARATE -- INSULIN HUMAN REGULAR	Delayed	Moderate	Good	Concurrent use of ANTIDIABETIC AGENTS and BETA-ADRENERGIC BLOCKERS may result in hypoglycemia or hyperglycemia; decreased symptoms of hypoglycemia.
211	Electronic	AMITRIPTYLINE HYDROCHLORIDE -- BROMOPRIDE	Not Specified	Contraindicated	Fair	Concurrent use of BROMOPRIDE and DRUGS THAT CAUSE EXTRAPYRAMIDAL REACTIONS may result in increased risk of extrapyramidal reactions.
211	Electronic	BROMOPRIDE -- SERTRALINE HYDROCHLORIDE	Not Specified	Contraindicated	Fair	Concurrent use of BROMOPRIDE and DRUGS THAT CAUSE EXTRAPYRAMIDAL REACTIONS may result in increased risk of extrapyramidal reactions.
211	Electronic	ALBUTEROL -- AMITRIPTYLINE HYDROCHLORIDE	Not Specified	Major	Fair	Concurrent use of ALBUTEROL and TRICYCLIC ANTIDEPRESSANTS may result in an increased risk of cardiovascular system effects (eg, tachycardia, blood pressure changes).
211	Electronic	AMITRIPTYLINE HYDROCHLORIDE -- DIPYRONE	Not Specified	Major	Excellent	Concurrent use of NSAID and TRICYCLIC ANTIDEPRESSANTS may result in an increased risk of bleeding.
211	Electronic	AMITRIPTYLINE HYDROCHLORIDE -- MORPHINE SULFATE	Not Specified	Major	Fair	Concurrent use of MORPHINE and SEROTONERGIC AGENTS WITH ANTICHOLINERGIC PROPERTIES may result in increased risk of paralytic ileus; increased risk of serotonin syndrome.
211	Electronic	AMITRIPTYLINE HYDROCHLORIDE -- ONDANSETRON	Not Specified	Major	Fair	Concurrent use of AMITRIPTYLINE and ONDANSETRON may result in an increased risk of QT interval prolongation.
211	Electronic	AMITRIPTYLINE HYDROCHLORIDE -- SERTRALINE HYDROCHLORIDE	Not Specified	Major	Fair	Concurrent use of SERTRALINE and SEROTONERGIC CYP2D6 SUBSTRATES THAT PROLONG THE QT INTERVAL may result in increased exposure of CYP2D6 substrate and risk of serotonin syndrome.
211	Electronic	BROMOPRIDE -- MORPHINE SULFATE	Not Specified	Major	Fair	Concurrent use of BROMOPRIDE and OPIOID ANALGESICS may result in potentiation of sedative effects .
211	Electronic	CLOBAZAM -- MORPHINE SULFATE	Not Specified	Major	Fair	Concurrent use of MORPHINE and CNS DEPRESSANTS may result in increased risk of respiratory and CNS depression.
211	Electronic	DIPYRONE -- RIVAROXABAN	Not Specified	Major	Fair	Concurrent use of ANTICOAGULANTS and NSAIDS may result in increased risk of bleeding.
211	Electronic	DIPYRONE -- SERTRALINE HYDROCHLORIDE	Not Specified	Major	Excellent	Concurrent use of NSAID and SSRI may result in an increased risk of bleeding.
211	Electronic	MORPHINE SULFATE -- ONDANSETRON	Not Specified	Major	Fair	Concurrent use of MORPHINE and SEROTONERGIC AGENTS may result in increased risk of serotonin syndrome.
211	Electronic	MORPHINE SULFATE -- SERTRALINE HYDROCHLORIDE	Not Specified	Major	Fair	Concurrent use of MORPHINE and SEROTONERGIC AGENTS may result in increased risk of serotonin syndrome.
211	Electronic	ONDANSETRON -- SERTRALINE HYDROCHLORIDE	Not Specified	Major	Fair	Concurrent use of SERTRALINE and SEROTONERGIC DRUGS THAT PROLONG QT INTERVAL may result in increased risk of serotonin syndrome and increased risk of QT-interval prolongation.
211	Electronic	RIVAROXABAN -- SERTRALINE HYDROCHLORIDE	Not Specified	Major	Fair	Concurrent use of RIVAROXABAN and SEROTONIN NOREPINEPHRINE REUPTAKE INHIBITORS AND SSRIS may result in increased risk of bleeding.
211	Electronic	AMITRIPTYLINE HYDROCHLORIDE -- CLOBAZAM	Not Specified	Moderate	Fair	Concurrent use of AMITRIPTYLINE and CYP2D6 INHIBITORS may result in increased exposure of amitriptyline.
211	Electronic	CLOBAZAM -- OMEPRAZOLE	Not Specified	Moderate	Fair	Concurrent use of CLOBAZAM and OMEPRAZOLE may result in increased exposure to the active metabolite of clobazam.
212	Electronic	DIPYRONE -- FUROSEMIDE	Not Specified	Major	Good	Concurrent use of LOOP DIURETICS and NSAIDS may result in reduced diuretic effectiveness and possible nephrotoxicity.
212	Electronic	DIPYRONE -- HEPARIN SODIUM	Not Specified	Major	Fair	Concurrent use of ANTICOAGULANTS and NSAIDS may result in increased risk of bleeding.
212	Electronic	ALBUTEROL -- FUROSEMIDE	Not Specified	Moderate	Fair	Concurrent use of ALBUTEROL and POTASSIUM-DEPLETING DIURETICS may result in ECG changes or hypokalemia.
212	Electronic	FUROSEMIDE -- HYDRALAZINE HYDROCHLORIDE	Rapid	Minor	Good	Concurrent use of FUROSEMIDE and HYDRALAZINE may result in an enhanced diuretic response to furosemide.
213	Electronic	BROMOPRIDE -- SERTRALINE HYDROCHLORIDE	Not Specified	Contraindicated	Fair	Concurrent use of BROMOPRIDE and DRUGS THAT CAUSE EXTRAPYRAMIDAL REACTIONS may result in increased risk of extrapyramidal reactions.
213	Electronic	BROMOPRIDE -- CLONAZEPAM	Not Specified	Major	Fair	Concurrent use of BROMOPRIDE and SEDATIVES may result in potentiation of sedative effects .
213	Electronic	DIPYRONE -- ENOXAPARIN SODIUM	Not Specified	Major	Good	Concurrent use of LOW-MOLECULAR-WEIGHT HEPARINS and NSAIDS may result in an increased risk of bleeding.
213	Electronic	DIPYRONE -- SERTRALINE HYDROCHLORIDE	Not Specified	Major	Excellent	Concurrent use of NSAID and SSRI may result in an increased risk of bleeding.
213	Electronic	ENOXAPARIN SODIUM -- SERTRALINE HYDROCHLORIDE	Delayed	Major	Good	Concurrent use of SERTRALINE and ANTICOAGULANTS may result in an increased risk of bleeding.
213	Electronic	PHENYTOIN -- SERTRALINE HYDROCHLORIDE	Not Specified	Major	Good	Concurrent use of PHENYTOIN and SERTRALINE may result in increased risk of phenytoin toxicity and decreased efficacy of sertraline.
213	Electronic	DIPYRONE -- LOSARTAN POTASSIUM	Not Specified	Moderate	Excellent	Concurrent use of ACE INHIBITORS AND ANGIOTENSIN RECEPTOR BLOCKERS and NSAIDS may result in renal dysfunction and/ or increased blood pressure.
213	Electronic	DIPYRONE -- PROPRANOLOL HYDROCHLORIDE	Delayed	Moderate	Good	Concurrent use of BETA-ADRENERGIC BLOCKERS and NSAIDS may result in increased blood pressure.
213	Electronic	LEVOTHYROXINE SODIUM -- PHENYTOIN	Delayed	Moderate	Good	Concurrent use of LEVOTHYROXINE and HYDANTOINS may result in decreased levothyroxine effectiveness.
213	Electronic	LEVOTHYROXINE SODIUM -- SERTRALINE HYDROCHLORIDE	Not Specified	Moderate	Fair	Concurrent use of LEVOTHYROXINE and SELECTIVE SEROTONIN REUPTAKE INHIBITORS may result in increased levothyroxine requirements.
213	Electronic	LEVOTHYROXINE SODIUM -- SIMVASTATIN	Delayed	Moderate	Good	Concurrent use of LEVOTHYROXINE and SIMVASTATIN may result in decreased levothyroxine efficacy.
213	Electronic	PHENYTOIN -- PROPRANOLOL HYDROCHLORIDE	Not Specified	Moderate	Fair	Concurrent use of PROPRANOLOL and CYP1A2 INDUCERS may result in decreased propranolol concentrations.
213	Electronic	PHENYTOIN -- SIMVASTATIN	Delayed	Moderate	Good	Concurrent use of PHENYTOIN and SIMVASTATIN may result in loss of simvastatin efficacy.
213	Electronic	PROPRANOLOL HYDROCHLORIDE -- SERTRALINE HYDROCHLORIDE	Delayed	Moderate	Good	Concurrent use of PROPRANOLOL and SERTRALINE may result in an increased risk of chest pain.
213	Electronic	CLONAZEPAM -- PHENYTOIN	Delayed	Minor	Good	Concurrent use of CLONAZEPAM and PHENYTOIN may result in altered concentrations of either drug.
214	Electronic	BUDESONIDE/ FORMOTEROL FUMARATE -- DIPYRONE	Not Specified	Major	Fair	Concurrent use of CORTICOSTEROIDS and NSAIDS may result in increased risk of gastrointestinal ulcer or bleeding.
214	Electronic	DIPYRONE -- PREDNISONE	Not Specified	Major	Fair	Concurrent use of CORTICOSTEROIDS and NSAIDS may result in increased risk of gastrointestinal ulcer or bleeding.
215	Electronic	DIPYRONE -- PROPRANOLOL HYDROCHLORIDE	Delayed	Moderate	Good	Concurrent use of BETA-ADRENERGIC BLOCKERS and NSAIDS may result in increased blood pressure.
216	Electronic	DIPYRONE -- ENOXAPARIN SODIUM	Not Specified	Major	Good	Concurrent use of LOW-MOLECULAR-WEIGHT HEPARINS and NSAIDS may result in an increased risk of bleeding.
217	Electronic	BROMOPRIDE -- QUETIAPINE FUMARATE	Not Specified	Contraindicated	Fair	Concurrent use of BROMOPRIDE and DRUGS THAT CAUSE EXTRAPYRAMIDAL REACTIONS may result in increased risk of extrapyramidal reactions.
217	Electronic	BROMOPRIDE -- TRAMADOL HYDROCHLORIDE	Not Specified	Major	Fair	Concurrent use of BROMOPRIDE and OPIOID ANALGESICS may result in potentiation of sedative effects .
217	Electronic	DIPYRONE -- ENOXAPARIN SODIUM	Not Specified	Major	Good	Concurrent use of LOW-MOLECULAR-WEIGHT HEPARINS and NSAIDS may result in an increased risk of bleeding.
217	Electronic	DIPYRONE -- FUROSEMIDE	Not Specified	Major	Good	Concurrent use of LOOP DIURETICS and NSAIDS may result in reduced diuretic effectiveness and possible nephrotoxicity.
217	Electronic	DIPYRONE -- SPIRONOLACTONE	Not Specified	Major	Good	Concurrent use of NSAIDS and POTASSIUM-SPARING DIURETICS may result in reduced diuretic effectiveness, hyperkalemia, or possible nephrotoxicity.
217	Electronic	POTASSIUM CHLORIDE -- SPIRONOLACTONE	Not Specified	Major	Fair	Concurrent use of POTASSIUM and SPIRONOLACTONE may result in hyperkalemia.
217	Electronic	QUETIAPINE FUMARATE -- TRAMADOL HYDROCHLORIDE	Not Specified	Major	Fair	Concurrent use of TRAMADOL and CNS DEPRESSANTS may result in increased risk of respiratory and CNS depression.
217	Electronic	LEVOTHYROXINE SODIUM -- OMEPRAZOLE	Not Specified	Moderate	Good	Concurrent use of LEVOTHYROXINE and PROTON PUMP INHIBITORS may result in decreased levothyroxine effectiveness.
218	Electronic	BROMOPRIDE -- TRAMADOL HYDROCHLORIDE	Not Specified	Major	Fair	Concurrent use of BROMOPRIDE and OPIOID ANALGESICS may result in potentiation of sedative effects .
218	Electronic	FERROUS SULFATE -- OMEPRAZOLE	Rapid	Moderate	Good	Concurrent use of IRON and OMEPRAZOLE may result in reduced non-heme iron bioavailability.
219	Electronic	BROMOPRIDE -- SERTRALINE HYDROCHLORIDE	Not Specified	Contraindicated	Fair	Concurrent use of BROMOPRIDE and DRUGS THAT CAUSE EXTRAPYRAMIDAL REACTIONS may result in increased risk of extrapyramidal reactions.
219	Electronic	AMIODARONE HYDROCHLORIDE -- DOMPERIDONE	Not Specified	Major	Fair	Concurrent use of AMIODARONE and DOMPERIDONE may result in increased domperidone exposure and an increased risk of QT prolongation.
219	Electronic	AMIODARONE HYDROCHLORIDE -- ONDANSETRON	Not Specified	Major	Fair	Concurrent use of AMIODARONE and QT PROLONGING AGENTS may result in increased risk of QT prolongation and torsades de pointes.
219	Electronic	AMIODARONE HYDROCHLORIDE -- SERTRALINE HYDROCHLORIDE	Not Specified	Major	Fair	Concurrent use of SERTRALINE and QT INTERVAL PROLONGING DRUGS may result in increased risk of QT-interval prolongation.
219	Electronic	BROMOPRIDE -- CLONAZEPAM	Not Specified	Major	Fair	Concurrent use of BROMOPRIDE and SEDATIVES may result in potentiation of sedative effects .
219	Electronic	DIPYRONE -- HEPARIN SODIUM	Not Specified	Major	Fair	Concurrent use of ANTICOAGULANTS and NSAIDS may result in increased risk of bleeding.
219	Electronic	DIPYRONE -- SERTRALINE HYDROCHLORIDE	Not Specified	Major	Excellent	Concurrent use of NSAID and SSRI may result in an increased risk of bleeding.
219	Electronic	DOMPERIDONE -- ONDANSETRON	Not Specified	Major	Fair	Concurrent use of DOMPERIDONE and ONDANSETRON may result in increased risk of QT interval prolongation.
219	Electronic	DOMPERIDONE -- SERTRALINE HYDROCHLORIDE	Not Specified	Major	Fair	Concurrent use of SERTRALINE and QT INTERVAL PROLONGING DRUGS may result in increased risk of QT-interval prolongation.
219	Electronic	HEPARIN SODIUM -- SERTRALINE HYDROCHLORIDE	Delayed	Major	Good	Concurrent use of SERTRALINE and ANTICOAGULANTS may result in an increased risk of bleeding.
219	Electronic	ONDANSETRON -- SERTRALINE HYDROCHLORIDE	Not Specified	Major	Fair	Concurrent use of SERTRALINE and SEROTONERGIC DRUGS THAT PROLONG QT INTERVAL may result in increased risk of serotonin syndrome and increased risk of QT-interval prolongation.
219	Electronic	AMIODARONE HYDROCHLORIDE -- BISOPROLOL FUMARATE	Rapid	Moderate	Excellent	Concurrent use of AMIODARONE and BETA-ADRENERGIC BLOCKERS may result in bradycardia, hypotension, sinus arrest, and AV block.
219	Electronic	AMIODARONE HYDROCHLORIDE -- CLONAZEPAM	Delayed	Moderate	Good	Concurrent use of AMIODARONE and CLONAZEPAM may result in clonazepam toxicity (confusion, slurred speech, enuresis).
219	Electronic	BISOPROLOL FUMARATE -- DIPYRONE	Delayed	Moderate	Good	Concurrent use of BETA-ADRENERGIC BLOCKERS and NSAIDS may result in increased blood pressure.
219	Electronic	FERROUS SULFATE -- LEVOTHYROXINE SODIUM	Delayed	Moderate	Good	Concurrent use of IRON and LEVOTHYROXINE may result in hypothyroidism.
219	Electronic	FERROUS SULFATE -- OMEPRAZOLE	Rapid	Moderate	Good	Concurrent use of IRON and OMEPRAZOLE may result in reduced non-heme iron bioavailability.
219	Electronic	LEVOTHYROXINE SODIUM -- OMEPRAZOLE	Not Specified	Moderate	Good	Concurrent use of LEVOTHYROXINE and PROTON PUMP INHIBITORS may result in decreased levothyroxine effectiveness.
219	Electronic	LEVOTHYROXINE SODIUM -- SERTRALINE HYDROCHLORIDE	Not Specified	Moderate	Fair	Concurrent use of LEVOTHYROXINE and SELECTIVE SEROTONIN REUPTAKE INHIBITORS may result in increased levothyroxine requirements.
220	Electronic	DIPYRONE -- ENOXAPARIN SODIUM	Not Specified	Major	Good	Concurrent use of LOW-MOLECULAR-WEIGHT HEPARINS and NSAIDS may result in an increased risk of bleeding.
220	Electronic	DIPYRONE -- HYDROCORTISONE	Not Specified	Major	Fair	Concurrent use of CORTICOSTEROIDS and NSAIDS may result in increased risk of gastrointestinal ulcer or bleeding.
221	Electronic	BROMOPRIDE -- PHENOBARBITAL	Not Specified	Major	Fair	Concurrent use of BROMOPRIDE and SEDATIVES may result in potentiation of sedative effects .
221	Electronic	BROMOPRIDE -- TRAMADOL HYDROCHLORIDE	Not Specified	Major	Fair	Concurrent use of BROMOPRIDE and OPIOID ANALGESICS may result in potentiation of sedative effects .
221	Electronic	CARBAMAZEPINE -- SIMVASTATIN	Delayed	Major	Good	Concurrent use of CARBAMAZEPINE and SIMVASTATIN may result in reduced simvastatin exposure.
221	Electronic	CARBAMAZEPINE -- TRAMADOL HYDROCHLORIDE	Not Specified	Major	Fair	Concurrent use of TRAMADOL and SEROTONERGIC CYP3A4 INDUCERS may result in increased risk of serotonin syndrome and reduced tramadol plasma concentrations.
221	Electronic	CIPROFLOXACIN -- SIMVASTATIN	Not Specified	Major	Good	Concurrent use of CIPROFLOXACIN and SIMVASTATIN may result in an increased risk of myopathy or rhabdomyolysis .
221	Electronic	CIPROFLOXACIN -- TRAMADOL HYDROCHLORIDE	Not Specified	Major	Fair	Concurrent use of TRAMADOL and CYP3A4 INHIBITORS may result in increased tramadol exposure and increased risk of respiratory depression.
221	Electronic	CLOBAZAM -- PHENOBARBITAL	Not Specified	Major	Good	Concurrent use of BARBITURATES and BENZODIAZEPINES may result in additive respiratory depression.
221	Electronic	CLOBAZAM -- TRAMADOL HYDROCHLORIDE	Not Specified	Major	Fair	Concurrent use of TRAMADOL and CNS DEPRESSANTS may result in increased risk of respiratory and CNS depression.
221	Electronic	DIPYRONE -- ENOXAPARIN SODIUM	Not Specified	Major	Good	Concurrent use of LOW-MOLECULAR-WEIGHT HEPARINS and NSAIDS may result in an increased risk of bleeding.
221	Electronic	PHENOBARBITAL -- TRAMADOL HYDROCHLORIDE	Not Specified	Major	Fair	Concurrent use of TRAMADOL and PHENOBARBITAL may result in increased risk of CNS depression and decreased plasma concentrations of tramadol.
221	Electronic	TOPIRAMATE -- TRAMADOL HYDROCHLORIDE	Not Specified	Major	Fair	Concurrent use of TRAMADOL and CNS DEPRESSANTS may result in increased risk of respiratory and CNS depression.
221	Electronic	CARBAMAZEPINE -- CIPROFLOXACIN	Not Specified	Moderate	Fair	Concurrent use of CARBAMAZEPINE and CYP3A4 INHIBITORS may result in increased carbamazepine exposure.
221	Electronic	CARBAMAZEPINE -- OMEPRAZOLE	Delayed	Moderate	Good	Concurrent use of CARBAMAZEPINE and OMEPRAZOLE may result in an increased risk of carbamazepine toxicity.
221	Electronic	CARBAMAZEPINE -- PHENOBARBITAL	Delayed	Moderate	Good	Concurrent use of CARBAMAZEPINE and PHENOBARBITAL may result in decreased carbamazepine exposure and potential loss of efficacy.
221	Electronic	CARBAMAZEPINE -- TOPIRAMATE	Delayed	Moderate	Good	Concurrent use of CARBAMAZEPINE and TOPIRAMATE may result in decreased topiramate concentrations.
221	Electronic	CLOBAZAM -- OMEPRAZOLE	Not Specified	Moderate	Fair	Concurrent use of CLOBAZAM and OMEPRAZOLE may result in increased exposure to the active metabolite of clobazam.
221	Electronic	PHENOBARBITAL -- TOPIRAMATE	Delayed	Moderate	Good	Concurrent use of PHENOBARBITAL and TOPIRAMATE may result in a decrease in serum concentrations of topiramate.
221	Electronic	CARBAMAZEPINE -- CLOBAZAM	Delayed	Minor	Good	Concurrent use of CLOBAZAM and CARBAMAZEPINE may result in decreased carbamazepine parent drug and/ or increased active metabolite concentrations.
222	Electronic	DEXAMETHASONE -- DIPYRONE	Not Specified	Major	Fair	Concurrent use of CORTICOSTEROIDS and NSAIDS may result in increased risk of gastrointestinal ulcer or bleeding.
222	Electronic	DIPYRONE -- ENOXAPARIN SODIUM	Not Specified	Major	Good	Concurrent use of LOW-MOLECULAR-WEIGHT HEPARINS and NSAIDS may result in an increased risk of bleeding.
222	Electronic	DEXAMETHASONE -- PHENYTOIN	Delayed	Moderate	Excellent	Concurrent use of DEXAMETHASONE and PHENYTOIN may result in decreased dexamethasone effectiveness.
222	Electronic	OMEPRAZOLE -- PHENYTOIN	Delayed	Moderate	Fair	Concurrent use of OMEPRAZOLE and PHENYTOIN may result in an increased risk of phenytoin toxicity (ataxia, hyperreflexia, nystagmus, tremor).
223	Electronic	BROMOPRIDE -- HALOPERIDOL	Not Specified	Contraindicated	Fair	Concurrent use of BROMOPRIDE and DRUGS THAT CAUSE EXTRAPYRAMIDAL REACTIONS may result in increased risk of extrapyramidal reactions.
223	Electronic	BROMOPRIDE -- QUETIAPINE FUMARATE	Not Specified	Contraindicated	Fair	Concurrent use of BROMOPRIDE and DRUGS THAT CAUSE EXTRAPYRAMIDAL REACTIONS may result in increased risk of extrapyramidal reactions.
223	Electronic	FLUCONAZOLE -- HALOPERIDOL	Not Specified	Contraindicated	Fair	Concurrent use of FLUCONAZOLE and HALOPERIDOL may result in increased haloperidol exposure and risk for QT interval prolongation.
223	Electronic	FLUCONAZOLE -- QUETIAPINE FUMARATE	Not Specified	Contraindicated	Fair	Concurrent use of FLUCONAZOLE and QUETIAPINE may result in increased quetiapine serum concentrations and an increased risk of QT prolongation.
223	Electronic	BROMOPRIDE -- MORPHINE SULFATE	Not Specified	Major	Fair	Concurrent use of BROMOPRIDE and OPIOID ANALGESICS may result in potentiation of sedative effects .
223	Electronic	HALOPERIDOL -- MORPHINE SULFATE	Not Specified	Major	Fair	Concurrent use of MORPHINE and CNS DEPRESSANTS may result in increased risk of respiratory and CNS depression.
223	Electronic	HALOPERIDOL -- QUETIAPINE FUMARATE	Not Specified	Major	Fair	Concurrent use of QUETIAPINE and QT INTERVAL PROLONGING AGENTS may result in increased risk of QT-interval prolongation.
223	Electronic	MORPHINE SULFATE -- QUETIAPINE FUMARATE	Not Specified	Major	Fair	Concurrent use of MORPHINE and CNS DEPRESSANTS may result in increased risk of respiratory and CNS depression.
223	Electronic	DEXAMETHASONE -- FLUCONAZOLE	Not Specified	Moderate	Fair	Concurrent use of FLUCONAZOLE and SELECTED GLUCOCORTICOIDS may result in increased glucocorticoid exposure and risk for toxicity.
223	Electronic	FLUCONAZOLE -- OMEPRAZOLE	Rapid	Moderate	Excellent	Concurrent use of FLUCONAZOLE and OMEPRAZOLE may result in increased plasma concentrations of omeprazole.
224	Electronic	BROMOPRIDE -- SERTRALINE HYDROCHLORIDE	Not Specified	Contraindicated	Fair	Concurrent use of BROMOPRIDE and DRUGS THAT CAUSE EXTRAPYRAMIDAL REACTIONS may result in increased risk of extrapyramidal reactions.
224	Electronic	KETOCONAZOLE -- METHADONE HYDROCHLORIDE	Not Specified	Contraindicated	Fair	Concurrent use of KETOCONAZOLE and METHADONE may result in increased serum methadone levels and increased risk of QT-interval prolongation.
224	Electronic	BACLOFEN -- METHADONE HYDROCHLORIDE	Not Specified	Major	Fair	Concurrent use of METHADONE and CNS DEPRESSANTS may result in increased risk of respiratory and CNS depression.
224	Electronic	BROMOPRIDE -- HYDROXYZINE HYDROCHLORIDE	Not Specified	Major	Fair	Concurrent use of BROMOPRIDE and SEDATIVES may result in potentiation of sedative effects .
224	Electronic	BROMOPRIDE -- METHADONE HYDROCHLORIDE	Not Specified	Major	Fair	Concurrent use of BROMOPRIDE and OPIOID ANALGESICS may result in potentiation of sedative effects .
224	Electronic	CARBAMAZEPINE -- KETOCONAZOLE	Not Specified	Major	Fair	Concurrent use of CARBAMAZEPINE and KETOCONAZOLE may result in increased carbamazepine exposure and reduced ketoconazole exposure.
224	Electronic	CARBAMAZEPINE -- METHADONE HYDROCHLORIDE	Rapid	Major	Fair	Concurrent use of METHADONE and SEROTONERGIC CYP3A4 INDUCERS may result in increased risk of serotonin syndrome; increased risk of methadone withdrawal symptoms.
224	Electronic	CARBAMAZEPINE -- SERTRALINE HYDROCHLORIDE	Not Specified	Major	Fair	Concurrent use of SERTRALINE and SEROTONERGIC AGENTS may result in increased risk of serotonin syndrome.
224	Electronic	DIPYRONE -- ENOXAPARIN SODIUM	Not Specified	Major	Good	Concurrent use of LOW-MOLECULAR-WEIGHT HEPARINS and NSAIDS may result in an increased risk of bleeding.
224	Electronic	DIPYRONE -- FUROSEMIDE	Not Specified	Major	Good	Concurrent use of LOOP DIURETICS and NSAIDS may result in reduced diuretic effectiveness and possible nephrotoxicity.
224	Electronic	DIPYRONE -- SERTRALINE HYDROCHLORIDE	Not Specified	Major	Excellent	Concurrent use of NSAID and SSRI may result in an increased risk of bleeding.
224	Electronic	ENOXAPARIN SODIUM -- SERTRALINE HYDROCHLORIDE	Delayed	Major	Good	Concurrent use of SERTRALINE and ANTICOAGULANTS may result in an increased risk of bleeding.
224	Electronic	HYDROXYZINE HYDROCHLORIDE -- KETOCONAZOLE	Not Specified	Major	Fair	Concurrent use of HYDROXYZINE and QT PROLONGING AGENTS may result in increased risk of QT interval prolongation.
224	Electronic	HYDROXYZINE HYDROCHLORIDE -- METHADONE HYDROCHLORIDE	Not Specified	Major	Fair	Concurrent use of METHADONE and ANTICHOLINERGIC CNS DEPRESSANTS THAT PROLONG THE QT INTERVAL may result in increased risk of respiratory and CNS depression; increased risk of paralytic ileus; increased risk of QT prolongation.
224	Electronic	HYDROXYZINE HYDROCHLORIDE -- SERTRALINE HYDROCHLORIDE	Not Specified	Major	Fair	Concurrent use of SERTRALINE and QT INTERVAL PROLONGING DRUGS may result in increased risk of QT-interval prolongation.
224	Electronic	KETOCONAZOLE -- OMEPRAZOLE	Not Specified	Major	Fair	Concurrent use of KETOCONAZOLE and PROTON PUMP INHIBITORS may result in decreased ketoconazole exposure.
224	Electronic	KETOCONAZOLE -- SERTRALINE HYDROCHLORIDE	Not Specified	Major	Fair	Concurrent use of SERTRALINE and QT INTERVAL PROLONGING DRUGS may result in increased risk of QT-interval prolongation.
224	Electronic	METHADONE HYDROCHLORIDE -- SERTRALINE HYDROCHLORIDE	Not Specified	Major	Fair	Concurrent use of SERTRALINE and SEROTONERGIC DRUGS THAT PROLONG QT INTERVAL may result in increased risk of serotonin syndrome and increased risk of QT-interval prolongation.
224	Electronic	CARBAMAZEPINE -- FUROSEMIDE	Delayed	Moderate	Good	Concurrent use of CARBAMAZEPINE and SELECTED DIURETICS may result in hyponatremia.
224	Electronic	CARBAMAZEPINE -- OMEPRAZOLE	Delayed	Moderate	Good	Concurrent use of CARBAMAZEPINE and OMEPRAZOLE may result in an increased risk of carbamazepine toxicity.
225	Electronic	BROMOPRIDE -- QUETIAPINE FUMARATE	Not Specified	Contraindicated	Fair	Concurrent use of BROMOPRIDE and DRUGS THAT CAUSE EXTRAPYRAMIDAL REACTIONS may result in increased risk of extrapyramidal reactions.
225	Electronic	DIPYRONE -- PREDNISONE	Not Specified	Major	Fair	Concurrent use of CORTICOSTEROIDS and NSAIDS may result in increased risk of gastrointestinal ulcer or bleeding.
225	Electronic	PHENYTOIN -- QUETIAPINE FUMARATE	Not Specified	Major	Fair	Concurrent use of QUETIAPINE and STRONG CYP3A4 INDUCERS may result in decreased quetiapine exposure.
225	Electronic	PHENYTOIN -- PREDNISONE	Delayed	Moderate	Good	Concurrent use of PHENYTOIN and PREDNISONE may result in decreased predniSONE effectiveness.
226	Electronic	None
227	Electronic	None
1	Manual	None
2	Manual	INSULIN HUMAN REGULAR -- METOCLOPRAMIDE HYDROCHLORIDE	Not Specified	Major	Fair	Concomitant use of metoclopramide with insulin may result in increased gastrointestinal motility by metoclopramide and subsequent increase in blood glucose due to increased delivery of food to the intestines. When coadministered, monitor blood glucose and adjust insulin dosage as needed (Prod Info REGLAN® oral tablets, 2017)
2	Manual	CAPTOPRIL -- DIPYRONE	Not Specified	Moderate	Excellent	Concurrent use of ACE INHIBITORS AND ANGIOTENSIN RECEPTOR BLOCKERS and NSAIDS may result in renal dysfunction and/ or increased blood pressure
2	Manual	CAPTOPRIL -- INSULIN HUMAN REGULAR	Not Specified	Moderate	Fair	Concurrent use of ACE INHIBITORS and ANTIDIABETIC AGENTS may result in increased risk of hypoglycemia
3	Manual	DEXAMETHASONE -- DIPYRONE	Not Specified	Major	Fair	Concurrent use of CORTICOSTEROIDS and NSAIDS may result in increased risk of gastrointestinal ulcer or bleeding
4	Manual	AMITRIPTYLINE HYDROCHLORIDE -- METOCLOPRAMIDE HYDROCHLORIDE	Not Specified	Contraindicated	Fair	Concurrent use of METOCLOPRAMIDE and TRICYCLIC ANTIDEPRESSANTS may result in an increased risk of extrapyramidal reactions and neuroleptic malignant syndrome
4	Manual	AMITRIPTYLINE HYDROCHLORIDE -- DIPYRONE	Not Specified	Major	Excellent	Concurrent use of NSAID and TRICYCLIC ANTIDEPRESSANTS may result in an increased risk of bleeding
4	Manual	AMITRIPTYLINE HYDROCHLORIDE -- LITHIUM CARBONATE	Not Specified	Major	Good	Concurrent use of LITHIUM and SEROTONERGIC AGENTS may result in increased risk of serotonin syndrome
4	Manual	CAPTOPRIL -- LITHIUM CARBONATE	Delayed	Major	Fair	Concurrent use of LITHIUM and ACE INHIBITORS may result in increased risk of lithium toxicity
4	Manual	DIPYRONE -- LITHIUM CARBONATE	Delayed	Major	Fair	Concurrent use of LITHIUM and NSAIDS may result in lithium toxicity
4	Manual	CAPTOPRIL -- DIPYRONE	Not Specified	Moderate	Excellent	Concurrent use of ACE INHIBITORS AND ANGIOTENSIN RECEPTOR BLOCKERS and NSAIDS may result in renal dysfunction and/or increased blood pressure
5	Manual	DIPYRONE -- ENOXAPARIN SODIUM	Not Specified	Major	Good	Concurrent use of LOW-MOLECULAR-WEIGHT HEPARINS and NSAIDS may result in an increased risk of bleeding
5	Manual	INSULIN HUMAN ISOPHANE (NPH) -- METOCLOPRAMIDE HYDROCHLORIDE	Not Specified	Major	Fair	Concurrent use of METOCLOPRAMIDE and INSULINS may result in risk of hyperglycemia
5	Manual	METOCLOPRAMIDE HYDROCHLORIDE -- TRAMADOL HYDROCHLORIDE	Not Specified	Major	Fair	Concurrent use of METOCLOPRAMIDE and CNS DEPRESSANTS may result in increased risk of CNS depression
6	Manual	DIPYRONE -- ENOXAPARIN SODIUM	Not Specified	Major	Good	Concurrent use of LOW-MOLECULAR-WEIGHT HEPARINS and NSAIDS may result in an increased risk of bleeding
6	Manual	INSULIN HUMAN REGULAR -- METOCLOPRAMIDE HYDROCHLORIDE	Not Specified	Major	Fair	Concurrent use of METOCLOPRAMIDE and INSULINS may result in risk of hyperglycemia
6	Manual	CAPTOPRIL -- DIPYRONE	Not Specified	Moderate	Excellent	Concurrent use of ACE INHIBITORS AND ANGIOTENSIN RECEPTOR BLOCKERS and NSAIDS may result in renal dysfunction and/or increased blood pressure
6	Manual	CAPTOPRIL -- INSULIN HUMAN REGULAR	Not Specified	Moderate	Fair	Concurrent use of ACE INHIBITORS and ANTIDIABETIC AGENTS may result in increased risk of hypoglycemia
8	Manual	CAPTOPRIL -- DIPYRONE	Not Specified	Moderate	Excellent	Concurrent use of ACE INHIBITORS AND ANGIOTENSIN RECEPTOR BLOCKERS and NSAIDS may result in renal dysfunction and/or increased blood pressure
8	Manual	CARVEDILOL -- DIPYRONE	Delayed	Moderate	Good	Concurrent use of BETA-ADRENERGIC BLOCKERS and NSAIDS may result in increased blood pressure
9	Manual	ASPIRIN -- DIPYRONE	Not Specified	Major	Excellent	Concurrent use of ASPIRIN and DIPYRONE may result in reduced efficacy of aspirin
9	Manual	DIPYRONE -- ENOXAPARIN SODIUM	Not Specified	Major	Good	Concurrent use of LOW-MOLECULAR-WEIGHT HEPARINS and NSAIDS may result in an increased risk of bleeding
9	Manual	INSULIN HUMAN ISOPHANE (NPH) -- METOCLOPRAMIDE HYDROCHLORIDE	Not Specified	Major	Fair	Concurrent use of METOCLOPRAMIDE and INSULINS may result in risk of hyperglycemia
9	Manual	INSULIN HUMAN REGULAR -- METOCLOPRAMIDE HYDROCHLORIDE	Not Specified	Major	Fair	Concurrent use of METOCLOPRAMIDE and INSULINS may result in risk of hyperglycemia
9	Manual	METOCLOPRAMIDE HYDROCHLORIDE -- TRAMADOL HYDROCHLORIDE	Not Specified	Major	Fair	Concurrent use of METOCLOPRAMIDE and CNS DEPRESSANTS may result in increased risk of CNS depression
9	Manual	ASPIRIN -- INSULIN HUMAN ISOPHANE (NPH)	Not Specified	Moderate	Fair	Concurrent use of INSULIN OR PRAMLINTIDE and SALICYLATES may result in increased risk of hypoglycemia
9	Manual	ASPIRIN -- INSULIN HUMAN REGULAR	Not Specified	Moderate	Fair	Concurrent use of INSULIN OR PRAMLINTIDE and SALICYLATES may result in increased risk of hypoglycemia
10	Manual	None
14	Manual	DIPYRONE -- ENOXAPARIN SODIUM	Not Specified	Major	Good	Concurrent use of LOW-MOLECULAR-WEIGHT HEPARINS and NSAIDS may result in an increased risk of bleeding
14	Manual	DIPYRONE -- FUROSEMIDE	Not Specified	Major	Good	Concurrent use of LOOP DIURETICS and NSAIDS may result in reduced diuretic effectiveness and possible nephrotoxicity
14	Manual	DIPYRONE -- HYDROCHLOROTHIAZIDE	Delayed	Major	Good	Concurrent use of NSAIDS and THIAZIDE DIURETICS may result in reduced diuretic effectiveness and possible nephrotoxicity
14	Manual	DIPYRONE -- PREDNISONE	Not Specified	Major	Fair	Concurrent use of CORTICOSTEROIDS and NSAIDS may result in increased risk of gastrointestinal ulcer or bleeding
14	Manual	INSULIN HUMAN ISOPHANE (NPH) -- METOCLOPRAMIDE HYDROCHLORIDE	Not Specified	Major	Fair	Concurrent use of METOCLOPRAMIDE and INSULINS may result in risk of hyperglycemia
14	Manual	ATENOLOL -- DIPYRONE	Delayed	Moderate	Good	Concurrent use of BETA-ADRENERGIC BLOCKERS and NSAIDS may result in increased blood pressure
14	Manual	ATENOLOL -- INSULIN HUMAN ISOPHANE (NPH)	Delayed	Moderate	Good	Concurrent use of ANTIDIABETIC AGENTS and BETA-ADRENERGIC BLOCKERS may result in hypoglycemia or hyperglycemia; decreased symptoms of hypoglycemia
14	Manual	DIPYRONE -- LOSARTAN POTASSIUM	Not Specified	Moderate	Excellent	Concurrent use of ACE INHIBITORS AND ANGIOTENSIN RECEPTOR BLOCKERS and NSAIDS may result in renal dysfunction and/or increased blood pressure
14	Manual	FUROSEMIDE -- INSULIN HUMAN ISOPHANE (NPH)	Not Specified	Moderate	Fair	Concurrent use of ANTIDIABETIC AGENTS and SELECTED DIURETICS may result in increased hyperglycemia risk; increased insulin requirement
14	Manual	HYDROCHLOROTHIAZIDE -- INSULIN HUMAN ISOPHANE (NPH)	Not Specified	Moderate	Fair	Concurrent use of ANTIDIABETIC AGENTS and SELECTED DIURETICS may result in increased hyperglycemia risk; increased insulin requirement
14	Manual	HYDROCHLOROTHIAZIDE -- PREDNISONE	Delayed	Moderate	Fair	Concurrent use of HYDROCHLOROTHIAZIDE and PREDNISONE may result in hypokalemia and subsequent cardiac arrhythmias
14	Manual	INSULIN HUMAN ISOPHANE (NPH) -- LOSARTAN POTASSIUM	Not Specified	Moderate	Fair	Concurrent use of ANGIOTENSIN RECEPTOR BLOCKERS and INSULIN may result in increased risk of hypoglycemia
15	Manual	INSULIN HUMAN ISOPHANE (NPH) -- METOCLOPRAMIDE HYDROCHLORIDE	Not Specified	Major	Fair	Concurrent use of METOCLOPRAMIDE and INSULINS may result in risk of hyperglycemia
16	Manual	INSULIN HUMAN ISOPHANE (NPH) -- METOCLOPRAMIDE HYDROCHLORIDE	Not Specified	Major	Fair	Concurrent use of METOCLOPRAMIDE and INSULINS may result in risk of hyperglycemia
16	Manual	IRON -- OMEPRAZOLE	Rapid	Moderate	Good	Concurrent use of IRON and OMEPRAZOLE may result in reduced non-heme iron bioavailability
17	Manual	AMIODARONE HYDROCHLORIDE -- FLUOXETINE HYDROCHLORIDE	Not Specified	Major	Fair	Concurrent use of FLUOXETINE and CLASS III ANTIARRHYTHMIC AGENTS may result in an increased risk of cardiotoxicity (QT prolongation, torsades de pointes, cardiac arrest)
17	Manual	AMIODARONE HYDROCHLORIDE -- METRONIDAZOLE	Not Specified	Major	Fair	Concurrent use of AMIODARONE and QT PROLONGING AGENTS may result in increased risk of QT prolongation and torsades de pointes
17	Manual	AMIODARONE HYDROCHLORIDE -- TRAMADOL HYDROCHLORIDE	Not Specified	Major	Fair	Concurrent use of TRAMADOL and CYP3A4 INHIBITORS may result in increased tramadol exposure and increased risk of respiratory depression
17	Manual	CLONAZEPAM -- METOCLOPRAMIDE HYDROCHLORIDE	Not Specified	Major	Fair	Concurrent use of METOCLOPRAMIDE and CNS DEPRESSANTS may result in increased risk of CNS depression
17	Manual	CLONAZEPAM -- TRAMADOL HYDROCHLORIDE	Not Specified	Major	Fair	Concurrent use of TRAMADOL and CNS DEPRESSANTS may result in increased risk of respiratory and CNS depression
17	Manual	DIPYRONE -- FLUOXETINE HYDROCHLORIDE	Not Specified	Major	Excellent	Concurrent use of NSAID and SSRI may result in an increased risk of bleeding
17	Manual	FLUOXETINE HYDROCHLORIDE -- METOCLOPRAMIDE HYDROCHLORIDE	Not Specified	Major	Fair	Concurrent use of METOCLOPRAMIDE and STRONG CYP2D6 INHIBITORS may result in increased metoclopramide exposure and risk of increased adverse events
17	Manual	FLUOXETINE HYDROCHLORIDE -- METRONIDAZOLE	Not Specified	Major	Fair	Concurrent use of METRONIDAZOLE and QT INTERVAL PROLONGING DRUGS may result in increased risk of QT-interval prolongation and arrhythmias
17	Manual	FLUOXETINE HYDROCHLORIDE -- TRAMADOL HYDROCHLORIDE	Not Specified	Major	Fair	Concurrent use of TRAMADOL and SEROTONERGIC CYP2D6 INHIBITORS may result in increased tramadol exposure and reduced concentrations of the active metabolite
17	Manual	INSULIN HUMAN REGULAR -- METOCLOPRAMIDE HYDROCHLORIDE	Not Specified	Major	Fair	Concurrent use of METOCLOPRAMIDE and INSULINS may result in risk of hyperglycemia
17	Manual	METOCLOPRAMIDE HYDROCHLORIDE -- TRAMADOL HYDROCHLORIDE	Not Specified	Major	Fair	Concurrent use of METOCLOPRAMIDE and CNS DEPRESSANTS may result in increased risk of CNS depression
17	Manual	AMIODARONE HYDROCHLORIDE -- CLONAZEPAM	Delayed	Moderate	Good	Concurrent use of AMIODARONE and CLONAZEPAM may result in clonazepam toxicity (confusion, slurred speech, enuresis)
17	Manual	CAPTOPRIL -- DIPYRONE	Not Specified	Moderate	Excellent	Concurrent use of ACE INHIBITORS AND ANGIOTENSIN RECEPTOR BLOCKERS and NSAIDS may result in renal dysfunction and/or increased blood pressure
17	Manual	CAPTOPRIL -- INSULIN HUMAN REGULAR	Not Specified	Moderate	Fair	Concurrent use of ACE INHIBITORS and ANTIDIABETIC AGENTS may result in increased risk of hypoglycemia
17	Manual	FLUOXETINE HYDROCHLORIDE -- INSULIN HUMAN REGULAR	Not Specified	Moderate	Fair	Concurrent use of FLUOXETINE and INSULINS OR PRAMLINTIDE may result in increased risk of hypoglycemia
18	Manual	CAPTOPRIL -- DIPYRONE	Not Specified	Moderate	Excellent	Concurrent use of ACE INHIBITORS AND ANGIOTENSIN RECEPTOR BLOCKERS and NSAIDS may result in renal dysfunction and/or increased blood pressure
20	Manual	AMITRIPTYLINE HYDROCHLORIDE -- CLONIDINE	Delayed	Major	Good	Concurrent use of AMITRIPTYLINE and CLONIDINE may result in decreased antihypertensive effectiveness
20	Manual	AMITRIPTYLINE HYDROCHLORIDE -- DIPYRONE	Not Specified	Major	Excellent	Concurrent use of NSAID and TRICYCLIC ANTIDEPRESSANTS may result in an increased risk of bleeding
20	Manual	AMITRIPTYLINE HYDROCHLORIDE -- DOMPERIDONE	Not Specified	Major	Fair	Concurrent use of AMITRIPTYLINE and DOMPERIDONE may result in increased risk of QT interval prolongation
20	Manual	AMITRIPTYLINE HYDROCHLORIDE -- TENOXICAM	Not Specified	Major	Excellent	Concurrent use of NSAID and TRICYCLIC ANTIDEPRESSANTS may result in an increased risk of bleeding
20	Manual	AMITRIPTYLINE HYDROCHLORIDE -- TRAMADOL HYDROCHLORIDE	Not Specified	Major	Fair	Concurrent use of TRAMADOL and SEROTONERGIC AGENTS WITH ANTICHOLINERGIC PROPERTIES may result in increased risk of paralytic ileus; increased risk of serotonin syndrome
20	Manual	DIPYRONE -- ENOXAPARIN SODIUM	Not Specified	Major	Good	Concurrent use of LOW-MOLECULAR-WEIGHT HEPARINS and NSAIDS may result in an increased risk of bleeding
20	Manual	DIPYRONE -- TENOXICAM	Not Specified	Major	Fair	Concurrent use of NSAIDS and NSAIDS AND SALICYLATES may result in increased risk of bleeding
20	Manual	ENOXAPARIN SODIUM -- TENOXICAM	Not Specified	Major	Good	Concurrent use of LOW-MOLECULAR-WEIGHT HEPARINS and NSAIDS may result in an increased risk of bleeding
20	Manual	CLONIDINE -- INSULIN HUMAN ISOPHANE (NPH)	Not Specified	Moderate	Fair	Concurrent use of CLONIDINE and INSULIN may result in hypoglycemia or hyperglycemia.
20	Manual	DIPYRONE -- LOSARTAN POTASSIUM	Not Specified	Moderate	Excellent	Concurrent use of ACE INHIBITORS AND ANGIOTENSIN RECEPTOR BLOCKERS and NSAIDS may result in renal dysfunction and/or increased blood pressure
20	Manual	INSULIN HUMAN ISOPHANE (NPH) -- LOSARTAN POTASSIUM	Not Specified	Moderate	Fair	Concurrent use of ANGIOTENSIN RECEPTOR BLOCKERS and INSULIN may result in increased risk of hypoglycemia
20	Manual	LOSARTAN POTASSIUM -- TENOXICAM	Not Specified	Moderate	Excellent	Concurrent use of ACE INHIBITORS AND ANGIOTENSIN RECEPTOR BLOCKERS and NSAIDS may result in renal dysfunction and/or increased blood pressure
21	Manual	FLUCONAZOLE -- OMEPRAZOLE	Rapid	Moderate	Excellent	Concurrent use of FLUCONAZOLE and OMEPRAZOLE may result in increased plasma concentrations of omeprazole
23	Manual	CLONAZEPAM -- TRAMADOL HYDROCHLORIDE	Not Specified	Major	Fair	Concurrent use of TRAMADOL and CNS DEPRESSANTS may result in increased risk of respiratory and CNS depression
24	Manual	METOCLOPRAMIDE HYDROCHLORIDE -- TRAMADOL HYDROCHLORIDE	Not Specified	Major	Fair	Concurrent use of METOCLOPRAMIDE and CNS DEPRESSANTS may result in increased risk of CNS depression
25	Manual	DIPYRONE -- FUROSEMIDE	Not Specified	Major	Good	Concurrent use of LOOP DIURETICS and NSAIDS may result in reduced diuretic effectiveness and possible nephrotoxicity
25	Manual	CAPTOPRIL -- DIPYRONE	Not Specified	Moderate	Excellent	Concurrent use of ACE INHIBITORS AND ANGIOTENSIN RECEPTOR BLOCKERS and NSAIDS may result in renal dysfunction and/or increased blood pressure
25	Manual	CAPTOPRIL -- FUROSEMIDE	Rapid	Moderate	Good	Concurrent use of ANGIOTENSIN CONVERTING ENZYME INHIBITORS and LOOP DIURETICS may result in postural hypotension (first dose)
25	Manual	CAPTOPRIL -- INSULIN HUMAN ISOPHANE (NPH)	Not Specified	Moderate	Fair	Concurrent use of ACE INHIBITORS and ANTIDIABETIC AGENTS may result in increased risk of hypoglycemia
25	Manual	FUROSEMIDE -- INSULIN HUMAN ISOPHANE (NPH)	Not Specified	Moderate	Fair	Concurrent use of ANTIDIABETIC AGENTS and SELECTED DIURETICS may result in increased hyperglycemia risk; increased insulin requirement
29	Manual	ASPIRIN -- DIPYRONE	Not Specified	Major	Excellent	Concurrent use of ASPIRIN and DIPYRONE may result in reduced efficacy of aspirin
29	Manual	DIPYRONE -- LOSARTAN POTASSIUM	Not Specified	Moderate	Excellent	Concurrent use of ACE INHIBITORS AND ANGIOTENSIN RECEPTOR BLOCKERS and NSAIDS may result in renal dysfunction and/or increased blood pressure
30	Manual	CAPTOPRIL -- LOSARTAN POTASSIUM	Not Specified	Major	Excellent	Concurrent use of ANGIOTENSIN CONVERTING ENZYME INHIBITORS and ANGIOTENSIN II RECEPTOR BLOCKERS may result in increased risk of adverse events (ie, hypotension, syncope, hyperkalemia, changes in renal function, acute renal failure)
30	Manual	METOCLOPRAMIDE HYDROCHLORIDE -- TRAMADOL HYDROCHLORIDE	Not Specified	Major	Fair	Concurrent use of METOCLOPRAMIDE and CNS DEPRESSANTS may result in increased risk of CNS depression
30	Manual	CAPTOPRIL -- DIPYRONE	Not Specified	Moderate	Excellent	Concurrent use of ACE INHIBITORS AND ANGIOTENSIN RECEPTOR BLOCKERS and NSAIDS may result in renal dysfunction and/or increased blood pressure
30	Manual	DIPYRONE -- LOSARTAN POTASSIUM	Not Specified	Moderate	Excellent	Concurrent use of ACE INHIBITORS AND ANGIOTENSIN RECEPTOR BLOCKERS and NSAIDS may result in renal dysfunction and/or increased blood pressure
33	Manual	DEXAMETHASONE -- DIPYRONE	Not Specified	Major	Fair	Concurrent use of CORTICOSTEROIDS and NSAIDS may result in increased risk of gastrointestinal ulcer or bleeding
33	Manual	DEXAMETHASONE -- TRAMADOL HYDROCHLORIDE	Not Specified	Major	Fair	Concurrent use of TRAMADOL and CYP3A4 INDUCERS may result in reduced tramadol exposure
34	Manual	METOCLOPRAMIDE HYDROCHLORIDE -- MORPHINE SULFATE	Not Specified	Major	Fair	Concurrent use of METOCLOPRAMIDE and CNS DEPRESSANTS may result in increased risk of CNS depression
35	Manual	ASPIRIN -- SERTRALINE HYDROCHLORIDE	Not Specified	Major	Excellent	Concurrent use of NSAID and SSRI may result in an increased risk of bleeding
35	Manual	FLUCONAZOLE -- SERTRALINE HYDROCHLORIDE	Not Specified	Major	Fair	Concurrent use of SERTRALINE and QT INTERVAL PROLONGING DRUGS may result in increased risk of QT-interval prolongation
35	Manual	ASPIRIN -- ATENOLOL	Delayed	Moderate	Good	Concurrent use of BETA-ADRENERGIC BLOCKERS and NSAIDS may result in increased blood pressure
35	Manual	CLONAZEPAM -- FLUCONAZOLE	Not Specified	Moderate	Fair	Concurrent use of CLONAZEPAM and FLUCONAZOLE may result in increased clonazepam exposure and risk for toxicity
35	Manual	FLUCONAZOLE -- OMEPRAZOLE	Rapid	Moderate	Excellent	Concurrent use of FLUCONAZOLE and OMEPRAZOLE may result in increased plasma concentrations of omeprazole
38	Manual	ONDANSETRON -- RISPERIDONE	Not Specified	Major	Fair	Concurrent use of ONDANSETRON and QT INTERVAL PROLONGING DRUGS may result in an increased risk of QT interval prolongation
41	Manual	ONDANSETRON -- RISPERIDONE	Not Specified	Major	Fair	Concurrent use of ONDANSETRON and QT INTERVAL PROLONGING DRUGS may result in an increased risk of QT interval prolongation
43	Manual	METOCLOPRAMIDE HYDROCHLORIDE -- TRAMADOL HYDROCHLORIDE	Not Specified	Major	Fair	Concurrent use of METOCLOPRAMIDE and CNS DEPRESSANTS may result in increased risk of CNS depression
43	Manual	METRONIDAZOLE -- ONDANSETRON	Not Specified	Major	Fair	Concurrent use of METRONIDAZOLE and QT INTERVAL PROLONGING DRUGS may result in increased risk of QT-interval prolongation and arrhythmias
43	Manual	ONDANSETRON -- TRAMADOL HYDROCHLORIDE	Not Specified	Major	Fair	Concurrent use of TRAMADOL and SEROTONERGIC AGENTS may result in increased risk of serotonin syndrome
44	Manual	CLONAZEPAM -- METOCLOPRAMIDE HYDROCHLORIDE	Not Specified	Major	Fair	Concurrent use of METOCLOPRAMIDE and CNS DEPRESSANTS may result in increased risk of CNS depression
44	Manual	DOMPERIDONE -- RANITIDINE HYDROCHLORIDE	Not Specified	Major	Fair	Concurrent use of DOMPERIDONE and RANITIDINE may result in increased domperidone exposure and an increased risk of QT prolongation
46	Manual	METOCLOPRAMIDE HYDROCHLORIDE -- TRAMADOL HYDROCHLORIDE	Not Specified	Major	Fair	Concurrent use of METOCLOPRAMIDE and CNS DEPRESSANTS may result in increased risk of CNS depression
47	Manual	METOCLOPRAMIDE HYDROCHLORIDE -- TRAMADOL HYDROCHLORIDE	Not Specified	Major	Fair	Concurrent use of METOCLOPRAMIDE and CNS DEPRESSANTS may result in increased risk of CNS depression
47	Manual	ONDANSETRON -- TRAMADOL HYDROCHLORIDE	Not Specified	Major	Fair	Concurrent use of TRAMADOL and SEROTONERGIC AGENTS may result in increased risk of serotonin syndrome
48	Manual	DIPYRONE -- ENOXAPARIN SODIUM	Not Specified	Major	Good	Concurrent use of LOW-MOLECULAR-WEIGHT HEPARINS and NSAIDS may result in an increased risk of bleeding
48	Manual	DIPYRONE -- PAROXETINE HYDROCHLORIDE	Not Specified	Major	Excellent	Concurrent use of NSAID and SSRI may result in an increased risk of bleeding
48	Manual	DIPYRONE -- SPIRONOLACTONE	Not Specified	Major	Good	Concurrent use of NSAIDS and POTASSIUM-SPARING DIURETICS may result in reduced diuretic effectiveness, hyperkalemia, or possible nephrotoxicity
48	Manual	ENOXAPARIN SODIUM -- PAROXETINE HYDROCHLORIDE	Delayed	Major	Good	Concurrent use of PAROXETINE and ANTICOAGULANTS may result in an increased risk of bleeding
48	Manual	PAROXETINE HYDROCHLORIDE -- TRAMADOL HYDROCHLORIDE	Not Specified	Major	Fair	Concurrent use of TRAMADOL and SEROTONERGIC CYP2D6 INHIBITORS may result in increased tramadol exposure and reduced concentrations of the active metabolite
49	Manual	INSULIN HUMAN ISOPHANE (NPH) -- METOCLOPRAMIDE HYDROCHLORIDE	Not Specified	Major	Fair	Concurrent use of METOCLOPRAMIDE and INSULINS may result in risk of hyperglycemia
49	Manual	METOCLOPRAMIDE HYDROCHLORIDE -- TRAMADOL HYDROCHLORIDE	Not Specified	Major	Fair	Concurrent use of METOCLOPRAMIDE and CNS DEPRESSANTS may result in increased risk of CNS depression
50	Manual	METOCLOPRAMIDE HYDROCHLORIDE -- TRAMADOL HYDROCHLORIDE	Not Specified	Major	Fair	Concurrent use of METOCLOPRAMIDE and CNS DEPRESSANTS may result in increased risk of CNS depression
50	Manual	PHENYTOIN -- TRAMADOL HYDROCHLORIDE	Not Specified	Major	Fair	Concurrent use of TRAMADOL and CYP3A4 INDUCERS may result in reduced tramadol exposure
50	Manual	OMEPRAZOLE -- PHENYTOIN	Delayed	Moderate	Fair	Concurrent use of OMEPRAZOLE and PHENYTOIN may result in an increased risk of phenytoin toxicity (ataxia, hyperreflexia, nystagmus, tremor)
51	Manual	DIPYRONE -- TENOXICAM	Not Specified	Major	Fair	Concurrent use of NSAIDS and NSAIDS AND SALICYLATES may result in increased risk of bleeding
52	Manual	DIPYRONE -- PREDNISONE	Not Specified	Major	Fair	Concurrent use of CORTICOSTEROIDS and NSAIDS may result in increased risk of gastrointestinal ulcer or bleeding
52	Manual	ATENOLOL -- DIPYRONE	Delayed	Moderate	Good	Concurrent use of BETA-ADRENERGIC BLOCKERS and NSAIDS may result in increased blood pressure
52	Manual	DIPYRONE -- LOSARTAN POTASSIUM	Not Specified	Moderate	Excellent	Concurrent use of ACE INHIBITORS AND ANGIOTENSIN RECEPTOR BLOCKERS and NSAIDS may result in renal dysfunction and/or increased blood pressure
52	Manual	ATENOLOL -- CALCIUM/ VITAMIN D	Rapid	Minor	Good	Concurrent use of ATENOLOL and ALUMINUM, CALCIUM OR MAGNESIUM CONTAINING PRODUCTS may result in reduced effectiveness of atenolol.
53	Manual	DIPYRONE -- HYDROCORTISONE	Not Specified	Major	Fair	Concurrent use of CORTICOSTEROIDS and NSAIDS may result in increased risk of gastrointestinal ulcer or bleeding
53	Manual	METOCLOPRAMIDE HYDROCHLORIDE -- MORPHINE SULFATE	Not Specified	Major	Fair	Concurrent use of METOCLOPRAMIDE and CNS DEPRESSANTS may result in increased risk of CNS depression
55	Manual	DIPYRONE -- FUROSEMIDE	Not Specified	Major	Good	Concurrent use of LOOP DIURETICS and NSAIDS may result in reduced diuretic effectiveness and possible nephrotoxicity
55	Manual	DIPYRONE -- ENALAPRIL MALEATE	Not Specified	Moderate	Excellent	Concurrent use of ACE INHIBITORS AND ANGIOTENSIN RECEPTOR BLOCKERS and NSAIDS may result in renal dysfunction and/or increased blood pressure
55	Manual	ENALAPRIL MALEATE -- FUROSEMIDE	Rapid	Moderate	Good	Concurrent use of ANGIOTENSIN CONVERTING ENZYME INHIBITORS and LOOP DIURETICS may result in postural hypotension (first dose)
56	Manual	METOCLOPRAMIDE HYDROCHLORIDE -- MORPHINE SULFATE	Not Specified	Major	Fair	Concurrent use of METOCLOPRAMIDE and CNS DEPRESSANTS may result in increased risk of CNS depression
57	Manual	METOCLOPRAMIDE HYDROCHLORIDE -- TRAMADOL HYDROCHLORIDE	Not Specified	Major	Fair	Concurrent use of METOCLOPRAMIDE and CNS DEPRESSANTS may result in increased risk of CNS depression
58	Manual	CAPTOPRIL -- DIPYRONE	Not Specified	Moderate	Excellent	Concurrent use of ACE INHIBITORS AND ANGIOTENSIN RECEPTOR BLOCKERS and NSAIDS may result in renal dysfunction and/or increased blood pressure
59	Manual	DIPYRONE -- ENOXAPARIN SODIUM	Not Specified	Major	Good	Concurrent use of LOW-MOLECULAR-WEIGHT HEPARINS and NSAIDS may result in an increased risk of bleeding
59	Manual	METOCLOPRAMIDE HYDROCHLORIDE -- TRAMADOL HYDROCHLORIDE	Not Specified	Major	Fair	Concurrent use of METOCLOPRAMIDE and CNS DEPRESSANTS may result in increased risk of CNS depression
60	Manual	METOCLOPRAMIDE HYDROCHLORIDE -- TRAMADOL HYDROCHLORIDE	Not Specified	Major	Fair	Concurrent use of METOCLOPRAMIDE and CNS DEPRESSANTS may result in increased risk of CNS depression
62	Manual	CAPTOPRIL -- DIPYRONE	Not Specified	Moderate	Excellent	Concurrent use of ACE INHIBITORS AND ANGIOTENSIN RECEPTOR BLOCKERS and NSAIDS may result in renal dysfunction and/or increased blood pressure
63	Manual	METOCLOPRAMIDE HYDROCHLORIDE -- TRAMADOL HYDROCHLORIDE	Not Specified	Major	Fair	Concurrent use of METOCLOPRAMIDE and CNS DEPRESSANTS may result in increased risk of CNS depression
65	Manual	DIPYRONE -- LEVOFLOXACIN	Delayed	Moderate	Fair	Concurrent use of LEVOFLOXACIN and NONSTEROIDAL ANTIINFLAMMATORY AGENTS may result in an increased risk of seizures
67	Manual	BACLOFEN -- FENTANYL	Not Specified	Major	Fair	Concurrent use of FENTANYL and CNS DEPRESSANTS may result in increased risk of CNS depression
67	Manual	FENTANYL -- MIDAZOLAM HYDROCHLORIDE	Not Specified	Major	Fair	Concurrent use of FENTANYL and CNS DEPRESSANTS may result in increased risk of CNS depression
67	Manual	FENTANYL -- PHENYTOIN	Not Specified	Major	Excellent	Concurrent use of FENTANYL and CYP3A4 INDUCERS may result in decreased plasma concentrations of fentanyl
67	Manual	GENTAMICIN SULFATE -- VANCOMYCIN HYDROCHLORIDE	Delayed	Major	Fair	Concurrent use of GENTAMICIN and VANCOMYCIN may result in nephrotoxicity
67	Manual	FOLIC ACID -- PHENYTOIN	Delayed	Moderate	Good	Concurrent use of FOLIC ACID and PHENYTOIN may result in decreased folic acid serum levels; decreased phenytoin effectiveness
67	Manual	MIDAZOLAM HYDROCHLORIDE -- PHENYTOIN	Rapid	Moderate	Good	Concurrent use of MIDAZOLAM and PHENYTOIN may result in decreased efficacy of midazolam
68	Manual	DIPYRONE -- HEPARIN SODIUM	Not Specified	Major	Fair	Concurrent use of ANTICOAGULANTS and NSAIDS may result in increased risk of bleeding
68	Manual	CAPTOPRIL -- DIPYRONE	Not Specified	Moderate	Excellent	Concurrent use of ACE INHIBITORS AND ANGIOTENSIN RECEPTOR BLOCKERS and NSAIDS may result in renal dysfunction and/or increased blood pressure
68	Manual	CAPTOPRIL -- INSULIN HUMAN REGULAR	Not Specified	Moderate	Fair	Concurrent use of ACE INHIBITORS and ANTIDIABETIC AGENTS may result in increased risk of hypoglycemia
69	Manual	DIPYRONE -- FONDAPARINUX SODIUM	Not Specified	Major	Fair	Concurrent use of ANTICOAGULANTS and NSAIDS may result in increased risk of bleeding
69	Manual	INSULIN HUMAN REGULAR -- METOCLOPRAMIDE HYDROCHLORIDE	Not Specified	Major	Fair	Concurrent use of METOCLOPRAMIDE and INSULINS may result in risk of hyperglycemia
70	Manual	CLOPIDOGREL HYDROGEN SULFATE -- DIPYRONE	Not Specified	Major	Fair	Concurrent use of ANTIPLATELET AGENTS and NSAIDS may result in increased risk of bleeding
70	Manual	CLOPIDOGREL HYDROGEN SULFATE -- HEPARIN SODIUM	Not Specified	Major	Fair	Concurrent use of ANTICOAGULANTS and ANTIPLATELET AGENTS may result in increased risk of bleeding
70	Manual	DIPYRONE -- FUROSEMIDE	Not Specified	Major	Good	Concurrent use of LOOP DIURETICS and NSAIDS may result in reduced diuretic effectiveness and possible nephrotoxicity
70	Manual	DIPYRONE -- HEPARIN SODIUM	Not Specified	Major	Fair	Concurrent use of ANTICOAGULANTS and NSAIDS may result in increased risk of bleeding
70	Manual	ATENOLOL -- DIPYRONE	Delayed	Moderate	Good	Concurrent use of BETA-ADRENERGIC BLOCKERS and NSAIDS may result in increased blood pressure
70	Manual	ATENOLOL -- INSULIN HUMAN ISOPHANE (NPH)	Delayed	Moderate	Good	Concurrent use of ANTIDIABETIC AGENTS and BETA-ADRENERGIC BLOCKERS may result in hypoglycemia or hyperglycemia; decreased symptoms of hypoglycemia
70	Manual	ATENOLOL -- INSULIN HUMAN REGULAR	Delayed	Moderate	Good	Concurrent use of ANTIDIABETIC AGENTS and BETA-ADRENERGIC BLOCKERS may result in hypoglycemia or hyperglycemia; decreased symptoms of hypoglycemia
70	Manual	ATORVASTATIN CALCIUM -- CLOPIDOGREL HYDROGEN SULFATE	Not Specified	Moderate	Excellent	Concurrent use of CLOPIDOGREL and CYP3A4 METABOLIZED STATINS may result in decreased formation of clopidogrel active metabolite resulting in high on-treatment platelet reactivity
70	Manual	FUROSEMIDE -- INSULIN HUMAN ISOPHANE (NPH)	Not Specified	Moderate	Fair	Concurrent use of ANTIDIABETIC AGENTS and SELECTED DIURETICS may result in increased hyperglycemia risk; increased insulin requirement
70	Manual	FUROSEMIDE -- INSULIN HUMAN REGULAR	Not Specified	Moderate	Fair	Concurrent use of ANTIDIABETIC AGENTS and SELECTED DIURETICS may result in increased hyperglycemia risk; increased insulin requirement
71	Manual	AMIODARONE HYDROCHLORIDE -- CLARITHROMYCIN	Not Specified	Major	Fair	Concurrent use of AMIODARONE and QT PROLONGING AGENTS may result in increased risk of QT prolongation and torsades de pointes
71	Manual	AMIODARONE HYDROCHLORIDE -- RANITIDINE HYDROCHLORIDE	Not Specified	Major	Fair	Concurrent use of AMIODARONE and RANITIDINE may result in increased amiodarone exposure
71	Manual	ASPIRIN -- DIPYRONE	Not Specified	Major	Excellent	Concurrent use of ASPIRIN and DIPYRONE may result in reduced efficacy of aspirin
71	Manual	ASPIRIN -- HEPARIN SODIUM	Not Specified	Major	Fair	Concurrent use of ANTICOAGULANTS and ANTIPLATELET AGENTS may result in increased risk of bleeding
71	Manual	DIPYRONE -- HEPARIN SODIUM	Not Specified	Major	Fair	Concurrent use of ANTICOAGULANTS and NSAIDS may result in increased risk of bleeding
71	Manual	ASPIRIN -- RANITIDINE HYDROCHLORIDE	Not Specified	Minor	Excellent	Concurrent use of ASPIRIN and RANITIDINE may result in reduced salicylate plasma levels and decreased antiplatelet effect of aspirin
72	Manual	ASPIRIN -- DIPYRONE	Not Specified	Major	Excellent	Concurrent use of ASPIRIN and DIPYRONE may result in reduced efficacy of aspirin
72	Manual	ASPIRIN -- FONDAPARINUX SODIUM	Not Specified	Major	Fair	Concurrent use of ANTICOAGULANTS and ANTIPLATELET AGENTS may result in increased risk of bleeding
72	Manual	ASPIRIN -- HYDROCHLOROTHIAZIDE	Delayed	Major	Good	Concurrent use of NSAIDS and THIAZIDE DIURETICS may result in reduced diuretic effectiveness and possible nephrotoxicity
72	Manual	DIPYRONE -- FONDAPARINUX SODIUM	Not Specified	Major	Fair	Concurrent use of ANTICOAGULANTS and NSAIDS may result in increased risk of bleeding
72	Manual	DIPYRONE -- HYDROCHLOROTHIAZIDE	Delayed	Major	Good	Concurrent use of NSAIDS and THIAZIDE DIURETICS may result in reduced diuretic effectiveness and possible nephrotoxicity
72	Manual	CANDESARTAN CILEXETIL -- DIPYRONE	Not Specified	Moderate	Excellent	Concurrent use of ACE INHIBITORS AND ANGIOTENSIN RECEPTOR BLOCKERS and NSAIDS may result in renal dysfunction and/or increased blood pressure
72	Manual	DIPYRONE -- LOSARTAN POTASSIUM	Not Specified	Moderate	Excellent	Concurrent use of ACE INHIBITORS AND ANGIOTENSIN RECEPTOR BLOCKERS and NSAIDS may result in renal dysfunction and/or increased blood pressure
72	Manual	ASPIRIN -- RANITIDINE HYDROCHLORIDE	Not Specified	Minor	Excellent	Concurrent use of ASPIRIN and RANITIDINE may result in reduced salicylate plasma levels and decreased antiplatelet effect of aspirin
73	Manual	BROMOPRIDE -- FENTANYL	Not Specified	Major	Fair	Concurrent use of BROMOPRIDE and OPIOID ANALGESICS may result in potentiation of sedative effects
73	Manual	BROMOPRIDE -- MIDAZOLAM HYDROCHLORIDE	Not Specified	Major	Fair	Concurrent use of BROMOPRIDE and SEDATIVES may result in potentiation of sedative effects
73	Manual	DIPYRONE -- HEPARIN SODIUM	Not Specified	Major	Fair	Concurrent use of ANTICOAGULANTS and NSAIDS may result in increased risk of bleeding
73	Manual	FENTANYL -- MIDAZOLAM HYDROCHLORIDE	Not Specified	Major	Fair	Concurrent use of FENTANYL and CNS DEPRESSANTS may result in increased risk of CNS depression
73	Manual	FENTANYL -- RANITIDINE HYDROCHLORIDE	Not Specified	Major	Excellent	Concurrent use of FENTANYL and CYP3A4 INHIBITORS may result in increased risk of fentanyl toxicity
73	Manual	MIDAZOLAM HYDROCHLORIDE -- RANITIDINE HYDROCHLORIDE	Not Specified	Major	Fair	Concurrent use of MIDAZOLAM and RANITIDINE may result in increased midazolam bioavailability
74	Manual	ASPIRIN -- DIPYRONE	Not Specified	Major	Excellent	Concurrent use of ASPIRIN and DIPYRONE may result in reduced efficacy of aspirin
74	Manual	BROMOPRIDE -- TRAMADOL HYDROCHLORIDE	Not Specified	Major	Fair	Concurrent use of BROMOPRIDE and OPIOID ANALGESICS may result in potentiation of sedative effects
74	Manual	RANITIDINE HYDROCHLORIDE -- TRAMADOL HYDROCHLORIDE	Not Specified	Major	Fair	Concurrent use of TRAMADOL and CYP3A4 INHIBITORS may result in increased tramadol exposure and increased risk of respiratory depression
74	Manual	ASPIRIN -- RANITIDINE HYDROCHLORIDE	Not Specified	Minor	Excellent	Concurrent use of ASPIRIN and RANITIDINE may result in reduced salicylate plasma levels and decreased antiplatelet effect of aspirin
75	Manual	BROMOPRIDE -- CLONAZEPAM	Not Specified	Major	Fair	Concurrent use of BROMOPRIDE and SEDATIVES may result in potentiation of sedative effects
75	Manual	DIPYRONE -- HEPARIN SODIUM	Not Specified	Major	Fair	Concurrent use of ANTICOAGULANTS and NSAIDS may result in increased risk of bleeding
75	Manual	CAPTOPRIL -- DIPYRONE	Not Specified	Moderate	Excellent	Concurrent use of ACE INHIBITORS AND ANGIOTENSIN RECEPTOR BLOCKERS and NSAIDS may result in renal dysfunction and/or increased blood pressure
76	Manual	HALOPERIDOL -- METOCLOPRAMIDE HYDROCHLORIDE	Not Specified	Contraindicated	Fair	Concurrent use of METOCLOPRAMIDE and ANTIPSYCHOTICS may result in an increased risk of extrapyramidal reactions and neuroleptic malignant syndrome
76	Manual	AMLODIPINE BESYLATE -- SIMVASTATIN	Rapid	Major	Good	Concurrent use of AMLODIPINE and SIMVASTATIN may result in increased simvastatin exposure and increased risk of myopathy, including rhabdomyolysis
76	Manual	ASPIRIN -- DIPYRONE	Not Specified	Major	Excellent	Concurrent use of ASPIRIN and DIPYRONE may result in reduced efficacy of aspirin
76	Manual	ATENOLOL -- CLONIDINE	Not Specified	Major	Fair	Concurrent use of ATENOLOL and CLONIDINE may result in increased risk of sinus bradycardia; exaggerated clonidine withdrawal response (acute hypertension)
76	Manual	HALOPERIDOL -- PROMETHAZINE HYDROCHLORIDE	Not Specified	Major	Fair	Concurrent use of HALOPERIDOL and PROMETHAZINE may result in an increased risk of QT interval prolongation
76	Manual	METOCLOPRAMIDE HYDROCHLORIDE -- PROMETHAZINE HYDROCHLORIDE	Not Specified	Major	Fair	Concurrent use of METOCLOPRAMIDE and CNS DEPRESSANTS may result in increased risk of CNS depression
76	Manual	ASPIRIN -- ATENOLOL	Delayed	Moderate	Good	Concurrent use of BETA-ADRENERGIC BLOCKERS and NSAIDS may result in increased blood pressure
76	Manual	ATENOLOL -- DIPYRONE	Delayed	Moderate	Good	Concurrent use of BETA-ADRENERGIC BLOCKERS and NSAIDS may result in increased blood pressure
76	Manual	CLONIDINE -- HALOPERIDOL	Not Specified	Moderate	Fair	Concurrent use of CLONIDINE and HALOPERIDOL may result in induction or exacerbation of orthostatic regulation disturbances and increased arrhythmogenic potential
76	Manual	DIPYRONE -- LOSARTAN POTASSIUM	Not Specified	Moderate	Excellent	Concurrent use of ACE INHIBITORS AND ANGIOTENSIN RECEPTOR BLOCKERS and NSAIDS may result in renal dysfunction and/or increased blood pressure
76	Manual	CYANOCOBALAMIN -- OMEPRAZOLE	Delayed	Minor	Good	Concurrent use of OMEPRAZOLE and CYANOCOBALAMIN may result in decreased cyanocobalamin absorption
77	Manual	AMLODIPINE BESYLATE -- CLOPIDOGREL HYDROGEN SULFATE	Not Specified	Major	Excellent	Concurrent use of AMLODIPINE and CLOPIDOGREL may result in decreased antiplatelet effect and increased risk of thrombotic events
77	Manual	AMLODIPINE BESYLATE -- SIMVASTATIN	Rapid	Major	Good	Concurrent use of AMLODIPINE and SIMVASTATIN may result in increased simvastatin exposure and increased risk of myopathy, including rhabdomyolysis
77	Manual	ASPIRIN -- CLOPIDOGREL HYDROGEN SULFATE	Not Specified	Major	Fair	Concurrent use of ASPIRIN and CLOPIDOGREL may result in an increased risk of bleeding
77	Manual	ASPIRIN -- DIPYRONE	Not Specified	Major	Excellent	Concurrent use of ASPIRIN and DIPYRONE may result in reduced efficacy of aspirin
77	Manual	BACLOFEN -- TRAMADOL HYDROCHLORIDE	Not Specified	Major	Fair	Concurrent use of TRAMADOL and CNS DEPRESSANTS may result in increased risk of respiratory and CNS depression
77	Manual	BROMOPRIDE -- TRAMADOL HYDROCHLORIDE	Not Specified	Major	Fair	Concurrent use of BROMOPRIDE and OPIOID ANALGESICS may result in potentiation of sedative effects
77	Manual	CLOPIDOGREL HYDROGEN SULFATE -- DIPYRONE	Not Specified	Major	Fair	Concurrent use of ANTIPLATELET AGENTS and NSAIDS may result in increased risk of bleeding
77	Manual	CLOPIDOGREL HYDROGEN SULFATE -- TRAMADOL HYDROCHLORIDE	Rapid	Major	Good	Concurrent use of CLOPIDOGREL and OPIOID AGONISTS may result in reduced efficacy of clopidogrel
77	Manual	ASPIRIN -- INSULIN HUMAN REGULAR	Not Specified	Moderate	Fair	Concurrent use of INSULIN OR PRAMLINTIDE and SALICYLATES may result in increased risk of hypoglycemia
77	Manual	CANDESARTAN CILEXETIL -- DIPYRONE	Not Specified	Moderate	Excellent	Concurrent use of ACE INHIBITORS AND ANGIOTENSIN RECEPTOR BLOCKERS and NSAIDS may result in renal dysfunction and/or increased blood pressure
77	Manual	CANDESARTAN CILEXETIL -- INSULIN HUMAN REGULAR	Not Specified	Moderate	Fair	Concurrent use of ANGIOTENSIN RECEPTOR BLOCKERS and INSULIN may result in increased risk of hypoglycemia
77	Manual	CLOPIDOGREL HYDROGEN SULFATE -- SIMVASTATIN	Not Specified	Moderate	Excellent	Concurrent use of CLOPIDOGREL and CYP3A4 METABOLIZED STATINS may result in decreased formation of clopidogrel active metabolite resulting in high on-treatment platelet reactivity
78	Manual	AMIKACIN SULFATE -- VANCOMYCIN HYDROCHLORIDE	Not Specified	Major	Fair	Concurrent use of AMIKACIN and VANCOMYCIN may result in additive ototoxicity and/or nephrotoxicity
78	Manual	BROMOPRIDE -- DIAZEPAM	Not Specified	Major	Fair	Concurrent use of BROMOPRIDE and SEDATIVES may result in potentiation of sedative effects
78	Manual	DIPYRONE -- HEPARIN SODIUM	Not Specified	Major	Fair	Concurrent use of ANTICOAGULANTS and NSAIDS may result in increased risk of bleeding.
78	Manual	DIPYRONE -- METHYLPREDNISOLONE	Not Specified	Major	Fair	Concurrent use of CORTICOSTEROIDS and NSAIDS may result in increased risk of gastrointestinal ulcer or bleeding
79	Manual	ALLOPURINOL -- CAPTOPRIL	Delayed	Major	Good	Concurrent use of ALLOPURINOL and CAPTOPRIL may result in hypersensitivity reactions (Stevens-Johnson syndrome, skin eruptions)
79	Manual	BROMOPRIDE -- FENTANYL	Not Specified	Major	Fair	Concurrent use of BROMOPRIDE and OPIOID ANALGESICS may result in potentiation of sedative effects
79	Manual	BROMOPRIDE -- MIDAZOLAM HYDROCHLORIDE	Not Specified	Major	Fair	Concurrent use of BROMOPRIDE and SEDATIVES may result in potentiation of sedative effects
79	Manual	BROMOPRIDE -- MORPHINE SULFATE	Not Specified	Major	Fair	Concurrent use of BROMOPRIDE and OPIOID ANALGESICS may result in potentiation of sedative effects
79	Manual	CAPTOPRIL -- MORPHINE SULFATE	Not Specified	Major	Fair	Concurrent use of MORPHINE and P-GLYCOPROTEIN INHIBITORS may result in increased morphine exposure
79	Manual	CAPTOPRIL -- POTASSIUM CHLORIDE	Delayed	Major	Good	Concurrent use of POTASSIUM and CAPTOPRIL may result in hyperkalemia
79	Manual	CAPTOPRIL -- CALCIUM CHLORIDE/ POTASSIUM CHLORIDE/ SODIUM CHLORIDE	Delayed	Major	Good	Concurrent use of POTASSIUM and CAPTOPRIL may result in hyperkalemia
79	Manual	CAPTOPRIL -- SULFAMETHOXAZOLE/ TRIMETHOPRIM	Not Specified	Major	Fair	Concurrent use of TRIMETHOPRIM and SELECTED POTASSIUM-SPARING DRUGS may result in increased risk of hyperkalemia
79	Manual	DIPYRONE -- FUROSEMIDE	Not Specified	Major	Good	Concurrent use of LOOP DIURETICS and NSAIDS may result in reduced diuretic effectiveness and possible nephrotoxicity
79	Manual	FENTANYL -- MIDAZOLAM HYDROCHLORIDE	Not Specified	Major	Fair	Concurrent use of FENTANYL and CNS DEPRESSANTS may result in increased risk of CNS depression
79	Manual	FENTANYL -- MORPHINE SULFATE	Not Specified	Major	Fair	Concurrent use of MORPHINE and SEROTONERGIC CNS DEPRESSANTS may result in increased risk of respiratory and CNS depression; increased risk of serotonin syndrome
79	Manual	FENTANYL -- VORICONAZOLE	Not Specified	Major	Excellent	Concurrent use of FENTANYL and CYP3A4 INHIBITORS may result in increased risk of fentanyl toxicity
79	Manual	MIDAZOLAM HYDROCHLORIDE -- MORPHINE SULFATE	Not Specified	Major	Fair	Concurrent use of MORPHINE and CNS DEPRESSANTS may result in increased risk of respiratory and CNS depression
79	Manual	OMEPRAZOLE -- VORICONAZOLE	Rapid	Major	Excellent	Concurrent use of OMEPRAZOLE and VORICONAZOLE may result in increased plasma concentrations of omeprazole
79	Manual	CAPTOPRIL -- DIPYRONE	Not Specified	Moderate	Excellent	Concurrent use of ACE INHIBITORS AND ANGIOTENSIN RECEPTOR BLOCKERS and NSAIDS may result in renal dysfunction and/or increased blood pressure
79	Manual	CAPTOPRIL -- FUROSEMIDE	Rapid	Moderate	Good	Concurrent use of ANGIOTENSIN CONVERTING ENZYME INHIBITORS and LOOP DIURETICS may result in postural hypotension (first dose)
79	Manual	FUROSEMIDE -- MORPHINE SULFATE	Not Specified	Moderate	Fair	Concurrent use of MORPHINE and DIURETICS may result in decreased efficacy of diuretics
79	Manual	MAGNESIUM SULFATE -- SUCCINYLCHOLINE CHLORIDE	Rapid	Moderate	Good	Concurrent use of SUCCINYLCHOLINE and MAGNESIUM may result in enhanced neuromuscular blockade
79	Manual	MIDAZOLAM HYDROCHLORIDE -- OMEPRAZOLE	Delayed	Moderate	Fair	Concurrent use of MIDAZOLAM and OMEPRAZOLE may result in benzodiazepine toxicity (CNS depression, ataxia, lethargy)
79	Manual	MIDAZOLAM HYDROCHLORIDE -- VORICONAZOLE	Rapid	Moderate	Excellent	Concurrent use of MIDAZOLAM and VORICONAZOLE may result in increase midazolam concentrations and potential midazolam toxicity (excessive sedation and prolonged hypnotic effects)
79	Manual	FUROSEMIDE -- SUCCINYLCHOLINE CHLORIDE	Rapid	Minor	Fair	Concurrent use of FUROSEMIDE and SUCCINYLCHOLINE may result in alterations of neuromuscular blockade
229	Electronic	None
230	Electronic	BROMOPRIDE -- RISPERIDONE	Not Specified	Contraindicated	Fair	Concurrent use of BROMOPRIDE and DRUGS THAT CAUSE EXTRAPYRAMIDAL REACTIONS may result in increased risk of extrapyramidal reactions.
230	Electronic	BROMOPRIDE -- TRAMADOL HYDROCHLORIDE	Not Specified	Major	Fair	Concurrent use of BROMOPRIDE and OPIOID ANALGESICS may result in potentiation of sedative effects
230	Electronic	METRONIDAZOLE -- RISPERIDONE	Not Specified	Major	Fair	Concurrent use of METRONIDAZOLE and QT INTERVAL PROLONGING DRUGS may result in increased risk of QT-interval prolongation and arrhythmias
230	Electronic	RANITIDINE HYDROCHLORIDE -- TRAMADOL HYDROCHLORIDE	Not Specified	Major	Fair	Concurrent use of TRAMADOL and CYP3A4 INHIBITORS may result in increased tramadol exposure and increased risk of respiratory depression
230	Electronic	RISPERIDONE -- RANITIDINE HYDROCHLORIDE	Not Specified	Moderate	Good	Concurrent use of RANITIDINE and RISPERIDONE may result in increased risperiDONE bioavailability
231	Electronic	BROMOPRIDE -- RISPERIDONE	Not Specified	Contraindicated	Fair	Concurrent use of BROMOPRIDE and DRUGS THAT CAUSE EXTRAPYRAMIDAL REACTIONS may result in increased risk of extrapyramidal reactions
231	Electronic	DIPYRONE -- HEPARIN SODIUM	Not Specified	Major	Fair	Concurrent use of ANTICOAGULANTS and NSAIDS may result in increased risk of bleeding
231	Electronic	ATENOLOL -- DIPYRONE	Delayed	Moderate	Good	Concurrent use of BETA-ADRENERGIC BLOCKERS and NSAIDS may result in increased blood pressure
232	Electronic	ACETAMINOPHEN/ CODEINE PHOSPHATE -- CLOPIDOGREL HYDROGEN SULFATE	Rapid	Major	Good	Concurrent use of CLOPIDOGREL and OPIOID AGONISTS may result in reduced efficacy of clopidogrel
232	Electronic	ACETAMINOPHEN/ CODEINE PHOSPHATE -- RANITIDINE HYDROCHLORIDE	Not Specified	Major	Fair	Concurrent use of CODEINE and CYP3A4 INHIBITORS may result in increased codeine and morphine concentrations
232	Electronic	ASPIRIN -- CLOPIDOGREL HYDROGEN SULFATE	Not Specified	Major	Fair	Concurrent use of ASPIRIN and CLOPIDOGREL may result in an increased risk of bleeding
232	Electronic	ASPIRIN -- DIPYRONE	Not Specified	Major	Excellent	Concurrent use of ASPIRIN and DIPYRONE may result in reduced efficacy of aspirin
232	Electronic	CLOPIDOGREL HYDROGEN SULFATE -- DIPYRONE	Not Specified	Major	Fair	Concurrent use of ANTIPLATELET AGENTS and NSAIDS may result in increased risk of bleeding
232	Electronic	ASPIRIN -- INSULIN HUMAN ISOPHANE (NPH)	Not Specified	Moderate	Fair	Concurrent use of INSULIN OR PRAMLINTIDE and SALICYLATES may result in increased risk of hypoglycemia
232	Electronic	CLOPIDOGREL HYDROGEN SULFATE -- SIMVASTATIN	Not Specified	Moderate	Excellent	Concurrent use of CLOPIDOGREL and CYP3A4 METABOLIZED STATINS may result in decreased formation of clopidogrel active metabolite resulting in high on-treatment platelet reactivity
232	Electronic	LEVOTHYROXINE SODIUM -- SIMVASTATIN	Delayed	Moderate	Good	Concurrent use of LEVOTHYROXINE and SIMVASTATIN may result in decreased levothyroxine efficacy
232	Electronic	ASPIRIN -- RANITIDINE HYDROCHLORIDE	Not Specified	Minor	Excellent	Concurrent use of ASPIRIN and RANITIDINE may result in reduced salicylate plasma levels and decreased antiplatelet effect of aspirin
233	Electronic	GABAPENTIN -- MORPHINE SULFATE	Not Specified	Moderate	Excellent	Concurrent use of GABAPENTIN and MORPHINE may result in increase in gabapentin plasma concentrations
234	Electronic	BROMOPRIDE -- RISPERIDONE	Not Specified	Contraindicated	Fair	Concurrent use of BROMOPRIDE and DRUGS THAT CAUSE EXTRAPYRAMIDAL REACTIONS may result in increased risk of extrapyramidal reactions
234	Electronic	ASPIRIN -- DIPYRONE	Not Specified	Major	Excellent	Concurrent use of ASPIRIN and DIPYRONE may result in reduced efficacy of aspirin
234	Electronic	ASPIRIN -- HEPARIN SODIUM	Not Specified	Major	Fair	Concurrent use of ANTICOAGULANTS and ANTIPLATELET AGENTS may result in increased risk of bleeding
234	Electronic	BROMOPRIDE -- TRAMADOL HYDROCHLORIDE	Not Specified	Major	Fair	Concurrent use of BROMOPRIDE and OPIOID ANALGESICS may result in potentiation of sedative effects
234	Electronic	DIPYRONE -- HEPARIN SODIUM	Not Specified	Major	Fair	Concurrent use of ANTICOAGULANTS and NSAIDS may result in increased risk of bleeding
234	Electronic	RANITIDINE HYDROCHLORIDE -- TRAMADOL HYDROCHLORIDE	Not Specified	Major	Fair	Concurrent use of TRAMADOL and CYP3A4 INHIBITORS may result in increased tramadol exposure and increased risk of respiratory depression
234	Electronic	RISPERIDONE -- RANITIDINE HYDROCHLORIDE	Not Specified	Moderate	Good	Concurrent use of RANITIDINE and RISPERIDONE may result in increased risperiDONE bioavailability
234	Electronic	ASPIRIN -- RANITIDINE HYDROCHLORIDE	Not Specified	Minor	Excellent	Concurrent use of ASPIRIN and RANITIDINE may result in reduced salicylate plasma levels and decreased antiplatelet effect of aspirin
235	Electronic	ASPIRIN -- DIPYRONE	Not Specified	Major	Excellent	Concurrent use of ASPIRIN and DIPYRONE may result in reduced efficacy of aspirin
235	Electronic	ASPIRIN -- HEPARIN SODIUM	Not Specified	Major	Fair	Concurrent use of ANTICOAGULANTS and ANTIPLATELET AGENTS may result in increased risk of bleeding
235	Electronic	DIPYRONE -- HEPARIN SODIUM	Not Specified	Major	Fair	Concurrent use of ANTICOAGULANTS and NSAIDS may result in increased risk of bleeding
235	Electronic	DIPYRONE -- METHYLPREDNISOLONE	Not Specified	Major	Fair	Concurrent use of CORTICOSTEROIDS and NSAIDS may result in increased risk of gastrointestinal ulcer or bleeding
235	Electronic	ACETAMINOPHEN -- PHENYTOIN	Delayed	Moderate	Good	Concurrent use of ACETAMINOPHEN and PHENYTOIN may result in decreased acetaminophen effectiveness and an increased risk of hepatotoxicity
235	Electronic	ASPIRIN -- METHYLPREDNISOLONE	Delayed	Moderate	Good	Concurrent use of ASPIRIN and METHYLPREDNISOLONE may result in an increased risk of gastrointestinal ulceration and subtherapeutic aspirin serum concentrations
235	Electronic	FOLIC ACID -- PHENYTOIN	Delayed	Moderate	Good	Concurrent use of FOLIC ACID and PHENYTOIN may result in decreased folic acid serum levels; decreased phenytoin effectiveness
235	Electronic	METHYLPREDNISOLONE -- PHENYTOIN	Delayed	Moderate	Fair	Concurrent use of METHYLPREDNISOLONE and PHENYTOIN may result in decreased methylPREDNISolone effectiveness
235	Electronic	OMEPRAZOLE -- PHENYTOIN	Delayed	Moderate	Fair	Concurrent use of OMEPRAZOLE and PHENYTOIN may result in an increased risk of phenytoin toxicity (ataxia, hyperreflexia, nystagmus, tremor)
235	Electronic	PHENYTOIN -- SIMVASTATIN	Delayed	Moderate	Good	Concurrent use of PHENYTOIN and SIMVASTATIN may result in loss of simvastatin efficacy
235	Electronic	ASPIRIN -- PHENYTOIN	Delayed	Minor	Fair	Concurrent use of ASPIRIN and PHENYTOIN may result in decreased phenytoin concentrations
236	Electronic	ASPIRIN -- DIPYRONE	Not Specified	Major	Excellent	Concurrent use of ASPIRIN and DIPYRONE may result in reduced efficacy of aspirin
236	Electronic	ASPIRIN -- HEPARIN SODIUM	Not Specified	Major	Fair	Concurrent use of ANTICOAGULANTS and ANTIPLATELET AGENTS may result in increased risk of bleeding
236	Electronic	ASPIRIN -- INDAPAMIDE	Delayed	Major	Good	Concurrent use of NSAIDS and THIAZIDE DIURETICS may result in reduced diuretic effectiveness and possible nephrotoxicity
236	Electronic	DIPYRONE -- HEPARIN SODIUM	Not Specified	Major	Fair	Concurrent use of ANTICOAGULANTS and NSAIDS may result in increased risk of bleeding
236	Electronic	DIPYRONE -- INDAPAMIDE	Delayed	Major	Good	Concurrent use of NSAIDS and THIAZIDE DIURETICS may result in reduced diuretic effectiveness and possible nephrotoxicity
236	Electronic	DOMPERIDONE -- GALANTAMINE HYDROBROMIDE	Not Specified	Major	Fair	Concurrent use of DOMPERIDONE and GALANTAMINE may result in increased risk of QT interval prolongation
236	Electronic	DOMPERIDONE -- ONDANSETRON	Not Specified	Major	Fair	Concurrent use of DOMPERIDONE and ONDANSETRON may result in increased risk of QT interval prolongation
236	Electronic	GALANTAMINE HYDROBROMIDE -- ONDANSETRON	Not Specified	Major	Fair	Concurrent use of ONDANSETRON and QT INTERVAL PROLONGING DRUGS may result in an increased risk of QT interval prolongation
236	Electronic	ONDANSETRON -- TRAMADOL HYDROCHLORIDE	Not Specified	Major	Fair	Concurrent use of TRAMADOL and SEROTONERGIC AGENTS may result in increased risk of serotonin syndrome
237	Electronic	ASPIRIN -- DIPYRONE	Not Specified	Major	Excellent	Concurrent use of ASPIRIN and DIPYRONE may result in reduced efficacy of aspirin
237	Electronic	ASPIRIN -- HEPARIN SODIUM	Not Specified	Major	Fair	Concurrent use of ANTICOAGULANTS and ANTIPLATELET AGENTS may result in increased risk of bleeding
237	Electronic	BROMOPRIDE -- TRAMADOL HYDROCHLORIDE	Not Specified	Major	Fair	Concurrent use of BROMOPRIDE and OPIOID ANALGESICS may result in potentiation of sedative effects
237	Electronic	DIPYRONE -- HEPARIN SODIUM	Not Specified	Major	Fair	Concurrent use of ANTICOAGULANTS and NSAIDS may result in increased risk of bleeding
237	Electronic	RANITIDINE HYDROCHLORIDE -- TRAMADOL HYDROCHLORIDE	Not Specified	Major	Fair	Concurrent use of TRAMADOL and CYP3A4 INHIBITORS may result in increased tramadol exposure and increased risk of respiratory depression
237	Electronic	ASPIRIN -- RANITIDINE HYDROCHLORIDE	Not Specified	Minor	Excellent	Concurrent use of ASPIRIN and RANITIDINE may result in reduced salicylate plasma levels and decreased antiplatelet effect of aspirin
238	Electronic	BROMOPRIDE -- HALOPERIDOL	Not Specified	Contraindicated	Fair	Concurrent use of BROMOPRIDE and DRUGS THAT CAUSE EXTRAPYRAMIDAL REACTIONS may result in increased risk of extrapyramidal reactions
238	Electronic	BROMOPRIDE -- RISPERIDONE	Not Specified	Contraindicated	Fair	Concurrent use of BROMOPRIDE and DRUGS THAT CAUSE EXTRAPYRAMIDAL REACTIONS may result in increased risk of extrapyramidal reactions
238	Electronic	DIPYRONE -- HEPARIN SODIUM	Not Specified	Major	Fair	Concurrent use of ANTICOAGULANTS and NSAIDS may result in increased risk of bleeding
238	Electronic	HALOPERIDOL -- RISPERIDONE	Not Specified	Major	Fair	Concurrent use of HALOPERIDOL and RISPERIDONE may result in an increased risk of QT interval prolongation
239	Electronic	DIPYRONE -- HEPARIN SODIUM	Not Specified	Major	Fair	Concurrent use of ANTICOAGULANTS and NSAIDS may result in increased risk of bleeding
240	Electronic	ASPIRIN -- DIPYRONE	Not Specified	Major	Excellent	Concurrent use of ASPIRIN and DIPYRONE may result in reduced efficacy of aspirin
240	Electronic	ASPIRIN -- HEPARIN SODIUM	Not Specified	Major	Fair	Concurrent use of ANTICOAGULANTS and ANTIPLATELET AGENTS may result in increased risk of bleeding
240	Electronic	BROMOPRIDE -- DIAZEPAM	Not Specified	Major	Fair	Concurrent use of BROMOPRIDE and SEDATIVES may result in potentiation of sedative effect
240	Electronic	DIPYRONE -- HEPARIN SODIUM	Not Specified	Major	Fair	Concurrent use of ANTICOAGULANTS and NSAIDS may result in increased risk of bleeding
240	Electronic	CLARITHROMYCIN -- DIAZEPAM	Delayed	Moderate	Good	Concurrent use of DIAZEPAM and CLARITHROMYCIN may result in increased benzodiazepine toxicity (CNS depression, ataxia, lethargy)
240	Electronic	ASPIRIN -- VALPROIC ACID	Delayed	Moderate	Good	Concurrent use of ASPIRIN and VALPROIC ACID may result in increased free valproic acid concentrations
240	Electronic	CLARITHROMYCIN -- VALPROIC ACID	Delayed	Moderate	Fair	Concurrent use of CLARITHROMYCIN and VALPROIC ACID may result in increased serum levels of valproate
241	Electronic	AMLODIPINE BESYLATE -- SIMVASTATIN	Rapid	Major	Good	Concurrent use of AMLODIPINE and SIMVASTATIN may result in increased simvastatin exposure and increased risk of myopathy, including rhabdomyolysis
241	Electronic	ASPIRIN -- DIPYRONE	Not Specified	Major	Excellent	Concurrent use of ASPIRIN and DIPYRONE may result in reduced efficacy of aspirin
241	Electronic	ASPIRIN -- HEPARIN SODIUM	Not Specified	Major	Fair	Concurrent use of ANTICOAGULANTS and ANTIPLATELET AGENTS may result in increased risk of bleeding
241	Electronic	DIPYRONE -- HEPARIN SODIUM	Not Specified	Major	Fair	Concurrent use of ANTICOAGULANTS and NSAIDS may result in increased risk of bleeding
241	Electronic	ASPIRIN -- CARVEDILOL	Delayed	Moderate	Good	Concurrent use of BETA-ADRENERGIC BLOCKERS and NSAIDS may result in increased blood pressure
241	Electronic	CARVEDILOL -- DIPYRONE	Delayed	Moderate	Good	Concurrent use of BETA-ADRENERGIC BLOCKERS and NSAIDS may result in increased blood pressure
241	Electronic	LEVOTHYROXINE SODIUM -- SIMVASTATIN	Delayed	Moderate	Good	Concurrent use of LEVOTHYROXINE and SIMVASTATIN may result in decreased levothyroxine efficacy
242	Electronic	BROMOPRIDE -- RISPERIDONE	Not Specified	Contraindicated	Fair	Concurrent use of BROMOPRIDE and DRUGS THAT CAUSE EXTRAPYRAMIDAL REACTIONS may result in increased risk of extrapyramidal reactions
243	Electronic	DIPYRONE -- HEPARIN SODIUM	Not Specified	Major	Fair	Concurrent use of ANTICOAGULANTS and NSAIDS may result in increased risk of bleeding
243	Electronic	DIPYRONE -- SERTRALINE HYDROCHLORIDE	Not Specified	Major	Excellent	Concurrent use of NSAID and SSRI may result in an increased risk of bleeding
243	Electronic	HEPARIN SODIUM -- SERTRALINE HYDROCHLORIDE	Delayed	Major	Good	Concurrent use of SERTRALINE and ANTICOAGULANTS may result in an increased risk of bleeding
243	Electronic	METHADONE HYDROCHLORIDE -- RISPERIDONE	Not Specified	Major	Good	Concurrent use of METHADONE and RISPERIDONE may result in precipitation of opioid withdrawal symptoms in opioid-dependent patients; increased risk of QT prolongation
243	Electronic	METHADONE HYDROCHLORIDE -- SERTRALINE HYDROCHLORIDE	Not Specified	Major	Fair	Concurrent use of SERTRALINE and SEROTONERGIC DRUGS THAT PROLONG QT INTERVAL may result in increased risk of serotonin syndrome and increased risk of QT-interval prolongation
243	Electronic	RISPERIDONE -- SERTRALINE HYDROCHLORIDE	Not Specified	Major	Fair	Concurrent use of RISPERIDONE and SERTRALINE may result in increased risperidone exposure and risk of QT interval prolongation
243	Electronic	ASPIRIN -- VALPROIC ACID	Delayed	Moderate	Good	Concurrent use of ASPIRIN and VALPROIC ACID may result in increased free valproic acid concentrations
243	Electronic	NIFEDIPINE -- VALPROIC ACID	Delayed	Moderate	Fair	Concurrent use of NIFEDIPINE and VALPROIC ACID may result in increased plasma concentration of NIFEdipine
243	Electronic	RISPERIDONE -- VALPROIC ACID	Not Specified	Moderate	Good	Concurrent use of RISPERIDONE and VALPROIC ACID may result in increased plasma valproic acid concentrations
243	Electronic	BROMOPRIDE -- RISPERIDONE	Not Specified	Contraindicated	Fair	Concurrent use of BROMOPRIDE and DRUGS THAT CAUSE EXTRAPYRAMIDAL REACTIONS may result in increased risk of extrapyramidal reactions
243	Electronic	BROMOPRIDE -- SERTRALINE HYDROCHLORIDE	Not Specified	Contraindicated	Fair	Concurrent use of BROMOPRIDE and DRUGS THAT CAUSE EXTRAPYRAMIDAL REACTIONS may result in increased risk of extrapyramidal reactions
243	Electronic	ASPIRIN -- DIPYRONE	Not Specified	Major	Excellent	Concurrent use of ASPIRIN and DIPYRONE may result in reduced efficacy of aspirin
243	Electronic	ASPIRIN -- HEPARIN SODIUM	Not Specified	Major	Fair	Concurrent use of ANTICOAGULANTS and ANTIPLATELET AGENTS may result in increased risk of bleeding
243	Electronic	ASPIRIN -- SERTRALINE HYDROCHLORIDE	Not Specified	Major	Excellent	Concurrent use of NSAID and SSRI may result in an increased risk of bleeding
243	Electronic	BROMOPRIDE -- CLONAZEPAM	Not Specified	Major	Fair	Concurrent use of BROMOPRIDE and SEDATIVES may result in potentiation of sedative effects
243	Electronic	BROMOPRIDE -- METHADONE HYDROCHLORIDE	Not Specified	Major	Fair	Concurrent use of BROMOPRIDE and OPIOID ANALGESICS may result in potentiation of sedative effects
243	Electronic	CLONAZEPAM -- METHADONE HYDROCHLORIDE	Not Specified	Major	Fair	Concurrent use of METHADONE and CNS DEPRESSANTS may result in increased risk of respiratory and CNS depression
244	Electronic	AMLODIPINE BESYLATE -- CLOPIDOGREL HYDROGEN SULFATE	Not Specified	Major	Excellent	Concurrent use of AMLODIPINE and CLOPIDOGREL may result in decreased antiplatelet effect and increased risk of thrombotic events
244	Electronic	AMLODIPINE BESYLATE -- DOMPERIDONE	Not Specified	Major	Fair	Concurrent use of AMLODIPINE and DOMPERIDONE may result in increased domperidone exposure and an increased risk of QT prolongation
244	Electronic	ASPIRIN -- CLOPIDOGREL HYDROGEN SULFATE	Not Specified	Major	Fair	Concurrent use of ASPIRIN and CLOPIDOGREL may result in an increased risk of bleeding
244	Electronic	ASPIRIN -- HEPARIN SODIUM	Not Specified	Major	Fair	Concurrent use of ANTICOAGULANTS and ANTIPLATELET AGENTS may result in increased risk of bleeding
244	Electronic	ASPIRIN -- HYDROCHLOROTHIAZIDE	Delayed	Major	Good	Concurrent use of NSAIDS and THIAZIDE DIURETICS may result in reduced diuretic effectiveness and possible nephrotoxicity
244	Electronic	CHLORPROMAZINE -- DOMPERIDONE	Not Specified	Major	Fair	Concurrent use of CHLORPROMAZINE and DOMPERIDONE may result in increased risk of QT interval prolongation
244	Electronic	CLOPIDOGREL HYDROGEN SULFATE -- HEPARIN SODIUM	Not Specified	Major	Fair	Concurrent use of ANTICOAGULANTS and ANTIPLATELET AGENTS may result in increased risk of bleeding
244	Electronic	DOMPERIDONE -- RANITIDINE HYDROCHLORIDE	Not Specified	Major	Fair	Concurrent use of DOMPERIDONE and RANITIDINE may result in increased domperidone exposure and an increased risk of QT prolongation
244	Electronic	ATORVASTATIN CALCIUM -- CLOPIDOGREL HYDROGEN SULFATE	Not Specified	Moderate	Excellent	Concurrent use of CLOPIDOGREL and CYP3A4 METABOLIZED STATINS may result in decreased formation of clopidogrel active metabolite resulting in high on-treatment platelet reactivity
244	Electronic	ASPIRIN -- RANITIDINE HYDROCHLORIDE	Not Specified	Minor	Excellent	Concurrent use of ASPIRIN and RANITIDINE may result in reduced salicylate plasma levels and decreased antiplatelet effect of aspirin
245	Electronic	None
246	Electronic	ASPIRIN -- DIPYRONE	Not Specified	Major	Excellent	Concurrent use of ASPIRIN and DIPYRONE may result in reduced efficacy of aspirin
246	Electronic	ASPIRIN -- HEPARIN SODIUM	Not Specified	Major	Fair	Concurrent use of ANTICOAGULANTS and ANTIPLATELET AGENTS may result in increased risk of bleeding
246	Electronic	DIPYRONE -- HEPARIN SODIUM	Not Specified	Major	Fair	Concurrent use of ANTICOAGULANTS and NSAIDS may result in increased risk of bleeding
246	Electronic	DIPYRONE -- HYDROCORTISONE	Not Specified	Major	Fair	Concurrent use of CORTICOSTEROIDS and NSAIDS may result in increased risk of gastrointestinal ulcer or bleeding
246	Electronic	ASPIRIN -- ENALAPRIL MALEATE	Rapid	Moderate	Excellent	Concurrent use of ASPIRIN and ENALAPRIL may result in decreased effectiveness of enalapril
246	Electronic	ASPIRIN -- METOPROLOL SUCCINATE	Delayed	Moderate	Good	Concurrent use of BETA-ADRENERGIC BLOCKERS and NSAIDS may result in increased blood pressure
246	Electronic	DIPYRONE -- ENALAPRIL MALEATE	Not Specified	Moderate	Excellent	Concurrent use of ACE INHIBITORS AND ANGIOTENSIN RECEPTOR BLOCKERS and NSAIDS may result in renal dysfunction and/or increased blood pressure
246	Electronic	DIPYRONE -- METOPROLOL SUCCINATE	Delayed	Moderate	Good	Concurrent use of BETA-ADRENERGIC BLOCKERS and NSAIDS may result in increased blood pressure
246	Electronic	ASPIRIN -- HYDROCORTISONE	Delayed	Minor	Good	Concurrent use of ASPIRIN and HYDROCORTISONE may result in an increased risk of gastrointestinal ulceration and subtherapeutic aspirin serum concentrations
247	Electronic	BROMOPRIDE -- HALOPERIDOL	Not Specified	Contraindicated	Fair	Concurrent use of BROMOPRIDE and DRUGS THAT CAUSE EXTRAPYRAMIDAL REACTIONS may result in increased risk of extrapyramidal reactions
247	Electronic	ASPIRIN -- DIPYRONE	Not Specified	Major	Excellent	Concurrent use of ASPIRIN and DIPYRONE may result in reduced efficacy of aspirin
247	Electronic	ASPIRIN -- FUROSEMIDE	Not Specified	Major	Good	Concurrent use of LOOP DIURETICS and NSAIDS may result in reduced diuretic effectiveness and possible nephrotoxicity
247	Electronic	ASPIRIN -- HEPARIN SODIUM	Not Specified	Major	Fair	Concurrent use of ANTICOAGULANTS and ANTIPLATELET AGENTS may result in increased risk of bleeding
247	Electronic	BROMOPRIDE -- CLONAZEPAM	Not Specified	Major	Fair	Concurrent use of BROMOPRIDE and SEDATIVES may result in potentiation of sedative effects
247	Electronic	BROMOPRIDE -- METHOTRIMEPRAZINE	Not Specified	Major	Fair	Concurrent use of BROMOPRIDE and SEDATIVES may result in potentiation of sedative effects
247	Electronic	BROMOPRIDE -- TRAMADOL HYDROCHLORIDE	Not Specified	Major	Fair	Concurrent use of BROMOPRIDE and OPIOID ANALGESICS may result in potentiation of sedative effects
247	Electronic	CLONAZEPAM -- TRAMADOL HYDROCHLORIDE	Not Specified	Major	Fair	Concurrent use of TRAMADOL and CNS DEPRESSANTS may result in increased risk of respiratory and CNS depression
247	Electronic	DIPYRONE -- FUROSEMIDE	Not Specified	Major	Good	Concurrent use of LOOP DIURETICS and NSAIDS may result in reduced diuretic effectiveness and possible nephrotoxicity
247	Electronic	DIPYRONE -- HEPARIN SODIUM	Not Specified	Major	Fair	Concurrent use of ANTICOAGULANTS and NSAIDS may result in increased risk of bleeding
247	Electronic	HALOPERIDOL -- TRAMADOL HYDROCHLORIDE	Not Specified	Major	Fair	Concurrent use of TRAMADOL and CNS DEPRESSANTS may result in increased risk of respiratory and CNS depression
247	Electronic	METHOTRIMEPRAZINE -- TRAMADOL HYDROCHLORIDE	Not Specified	Major	Fair	Concurrent use of TRAMADOL and CNS DEPRESSANTS may result in increased risk of respiratory and CNS depression
248	Electronic	ASPIRIN -- DIPYRONE	Not Specified	Major	Excellent	Concurrent use of ASPIRIN and DIPYRONE may result in reduced efficacy of aspirin
248	Electronic	ASPIRIN -- SPIRONOLACTONE	Not Specified	Major	Good	Concurrent use of NSAIDS and POTASSIUM-SPARING DIURETICS may result in reduced diuretic effectiveness, hyperkalemia, or possible nephrotoxicity
248	Electronic	DIPYRONE -- ENOXAPARIN SODIUM	Not Specified	Major	Good	Concurrent use of LOW-MOLECULAR-WEIGHT HEPARINS and NSAIDS may result in an increased risk of bleeding
248	Electronic	DIPYRONE -- SPIRONOLACTONE	Not Specified	Major	Good	Concurrent use of NSAIDS and POTASSIUM-SPARING DIURETICS may result in reduced diuretic effectiveness, hyperkalemia, or possible nephrotoxicity
248	Electronic	ENALAPRIL MALEATE -- SPIRONOLACTONE	Delayed	Major	Good	Concurrent use of POTASSIUM-SPARING DIURETICS and ANGIOTENSIN CONVERTING ENZYME INHIBITORS may result in hyperkalemia
248	Electronic	ASPIRIN -- ENALAPRIL MALEATE	Rapid	Moderate	Excellent	Concurrent use of ASPIRIN and ENALAPRIL may result in decreased effectiveness of enalapril
248	Electronic	ASPIRIN -- INSULIN HUMAN ISOPHANE (NPH)	Not Specified	Moderate	Fair	Concurrent use of INSULIN OR PRAMLINTIDE and SALICYLATES may result in increased risk of hypoglycemia
248	Electronic	DIPYRONE -- ENALAPRIL MALEATE	Not Specified	Moderate	Excellent	Concurrent use of ACE INHIBITORS AND ANGIOTENSIN RECEPTOR BLOCKERS and NSAIDS may result in renal dysfunction and/or increased blood pressure
248	Electronic	ENALAPRIL MALEATE -- INSULIN HUMAN ISOPHANE (NPH)	Not Specified	Moderate	Fair	Concurrent use of ACE INHIBITORS and ANTIDIABETIC AGENTS may result in increased risk of hypoglycemia
249	Electronic	BROMOPRIDE -- HALOPERIDOL	Not Specified	Contraindicated	Fair	Concurrent use of BROMOPRIDE and DRUGS THAT CAUSE EXTRAPYRAMIDAL REACTIONS may result in increased risk of extrapyramidal reactions
249	Electronic	BROMOPRIDE -- MIRTAZAPINE	Not Specified	Contraindicated	Fair	Concurrent use of BROMOPRIDE and DRUGS THAT CAUSE EXTRAPYRAMIDAL REACTIONS may result in increased risk of extrapyramidal reactions
249	Electronic	BROMOPRIDE -- PROMETHAZINE HYDROCHLORIDE	Not Specified	Contraindicated	Fair	Concurrent use of BROMOPRIDE and DRUGS THAT CAUSE EXTRAPYRAMIDAL REACTIONS may result in increased risk of extrapyramidal reactions
249	Electronic	BROMOPRIDE -- RISPERIDONE	Not Specified	Contraindicated	Fair	Concurrent use of BROMOPRIDE and DRUGS THAT CAUSE EXTRAPYRAMIDAL REACTIONS may result in increased risk of extrapyramidal reactions
249	Electronic	AMIODARONE HYDROCHLORIDE -- AMLODIPINE BESYLATE	Rapid	Major	Good	Concurrent use of AMIODARONE and CALCIUM CHANNEL BLOCKERS may result in bradycardia, atrioventricular block and/or sinus arrest
249	Electronic	AMIODARONE HYDROCHLORIDE -- HALOPERIDOL	Not Specified	Major	Fair	Concurrent use of AMIODARONE and QT PROLONGING AGENTS may result in increased risk of QT prolongation and torsades de pointes
249	Electronic	AMIODARONE HYDROCHLORIDE -- PROMETHAZINE HYDROCHLORIDE	Not Specified	Major	Fair	Concurrent use of AMIODARONE and QT PROLONGING AGENTS may result in increased risk of QT prolongation and torsades de pointes
249	Electronic	AMIODARONE HYDROCHLORIDE -- RISPERIDONE	Not Specified	Major	Fair	Concurrent use of AMIODARONE and QT PROLONGING AGENTS may result in increased risk of QT prolongation and torsades de pointes
249	Electronic	ASPIRIN -- DIPYRONE	Not Specified	Major	Excellent	Concurrent use of ASPIRIN and DIPYRONE may result in reduced efficacy of aspirin.
249	Electronic	ASPIRIN -- HEPARIN SODIUM	Not Specified	Major	Fair	Concurrent use of ANTICOAGULANTS and ANTIPLATELET AGENTS may result in increased risk of bleeding
249	Electronic	BROMOPRIDE -- MIDAZOLAM HYDROCHLORIDE	Not Specified	Major	Fair	Concurrent use of BROMOPRIDE and SEDATIVES may result in potentiation of sedative effects
249	Electronic	CLONIDINE -- MIRTAZAPINE	Delayed	Major	Good	Concurrent use of MIRTAZAPINE and CLONIDINE may result in hypertension, decreased antihypertensive effectiveness
249	Electronic	DIPYRONE -- HEPARIN SODIUM	Not Specified	Major	Fair	Concurrent use of ANTICOAGULANTS and NSAIDS may result in increased risk of bleeding
249	Electronic	HALOPERIDOL -- PROMETHAZINE HYDROCHLORIDE	Not Specified	Major	Fair	Concurrent use of HALOPERIDOL and PROMETHAZINE may result in an increased risk of QT interval prolongation
249	Electronic	HALOPERIDOL -- RISPERIDONE	Not Specified	Major	Fair	Concurrent use of HALOPERIDOL and RISPERIDONE may result in an increased risk of QT interval prolongation
249	Electronic	LEVOTHYROXINE SODIUM -- MIRTAZAPINE	Not Specified	Major	Fair	Concurrent use of LEVOTHYROXINE and TETRACYCLIC ANTIDEPRESSANTS may result in increased therapeutic and toxic effects of both levothyroxine and tetracyclic antidepressant
249	Electronic	MIDAZOLAM HYDROCHLORIDE -- MIRTAZAPINE	Not Specified	Major	Fair	Concurrent use of MIRTAZAPINE and BENZODIAZEPINES may result in increased risk of CNS depression.
249	Electronic	AMIODARONE HYDROCHLORIDE -- ATORVASTATIN CALCIUM	Not Specified	Moderate	Good	Concurrent use of AMIODARONE and ATORVASTATIN may result in an increased risk of myopathy or rhabdomyolysis
249	Electronic	ASPIRIN -- CAPTOPRIL	Rapid	Moderate	Excellent	Concurrent use of CAPTOPRIL and ASPIRIN may result in decreased captopril effectiveness
249	Electronic	CAPTOPRIL -- DIPYRONE	Not Specified	Moderate	Excellent	Concurrent use of ACE INHIBITORS AND ANGIOTENSIN RECEPTOR BLOCKERS and NSAIDS may result in renal dysfunction and/or increased blood pressure
249	Electronic	CLONIDINE -- HALOPERIDOL	Not Specified	Moderate	Fair	Concurrent use of CLONIDINE and HALOPERIDOL may result in induction or exacerbation of orthostatic regulation disturbances and increased arrhythmogenic potential
249	Electronic	CLONIDINE -- RISPERIDONE	Not Specified	Moderate	Fair	Concurrent use of CLONIDINE and RISPERIDONE may result in induction or exacerbation of orthostatic regulation disturbances
249	Electronic	ATORVASTATIN CALCIUM -- MIDAZOLAM HYDROCHLORIDE	Not Specified	Minor	Fair	Concurrent use of ATORVASTATIN and MIDAZOLAM may result in prolonged midazolam efficacy
250	Electronic	BROMOPRIDE -- ESCITALOPRAM OXALATE	Not Specified	Contraindicated	Fair	Concurrent use of BROMOPRIDE and DRUGS THAT CAUSE EXTRAPYRAMIDAL REACTIONS may result in increased risk of extrapyramidal reactions
250	Electronic	CLARITHROMYCIN -- SIMVASTATIN	Not Specified	Contraindicated	Good	Concurrent use of CLARITHROMYCIN and SIMVASTATIN may result in an increased risk of myopathy or rhabdomyolysis
250	Electronic	BROMOPRIDE -- CLONAZEPAM	Not Specified	Major	Fair	Concurrent use of BROMOPRIDE and SEDATIVES may result in potentiation of sedative effects
250	Electronic	CLARITHROMYCIN -- CLONAZEPAM	Not Specified	Major	Fair	Concurrent use of CLARITHROMYCIN and EXTENSIVE CYP3A4 SUBSTRATES may result in increased exposure of CYP3A substrate and risk for toxicity
250	Electronic	CLARITHROMYCIN -- ESCITALOPRAM OXALATE	Not Specified	Major	Fair	Concurrent use of ESCITALOPRAM and QT INTERVAL-PROLONGING DRUGS may result in increased risk of QT-interval prolongation
250	Electronic	CLARITHROMYCIN -- GALANTAMINE HYDROBROMIDE	Not Specified	Major	Fair	Concurrent use of CLARITHROMYCIN and SELECTED QT INTERVAL PROLONGING DRUGS may result in increased risk of QT-interval prolongation
250	Electronic	DIPYRONE -- ESCITALOPRAM OXALATE	Not Specified	Major	Excellent	Concurrent use of NSAID and SSRI may result in an increased risk of bleeding
250	Electronic	DIPYRONE -- FUROSEMIDE	Not Specified	Major	Good	Concurrent use of LOOP DIURETICS and NSAIDS may result in reduced diuretic effectiveness and possible nephrotoxicity
250	Electronic	ESCITALOPRAM OXALATE -- GALANTAMINE HYDROBROMIDE	Not Specified	Major	Fair	Concurrent use of ESCITALOPRAM and QT INTERVAL-PROLONGING DRUGS may result in increased risk of QT-interval prolongation
250	Electronic	CARVEDILOL -- DIPYRONE	Delayed	Moderate	Good	Concurrent use of BETA-ADRENERGIC BLOCKERS and NSAIDS may result in increased blood pressure
250	Electronic	ESCITALOPRAM OXALATE -- LEVOTHYROXINE SODIUM	Not Specified	Moderate	Fair	Concurrent use of LEVOTHYROXINE and SELECTIVE SEROTONIN REUPTAKE INHIBITORS may result in increased levothyroxine requirements
250	Electronic	LEVOTHYROXINE SODIUM -- SIMVASTATIN	Delayed	Moderate	Good	Concurrent use of LEVOTHYROXINE and SIMVASTATIN may result in decreased levothyroxine efficacy
251	Electronic	DIPYRONE -- ENOXAPARIN SODIUM	Not Specified	Major	Good	Concurrent use of LOW-MOLECULAR-WEIGHT HEPARINS and NSAIDS may result in an increased risk of bleeding.
251	Electronic	DIPYRONE -- WARFARIN SODIUM	Not Specified	Major	Fair	Concurrent use of ANTICOAGULANTS and NSAIDS may result in increased risk of bleeding
251	Electronic	ENOXAPARIN SODIUM -- WARFARIN SODIUM	Not Specified	Major	Fair	Concurrent use of ENOXAPARIN and WARFARIN may result in increased risk of bleeding
251	Electronic	SIMVASTATIN -- WARFARIN SODIUM	Delayed	Major	Excellent	Concurrent use of SIMVASTATIN and WARFARIN may result in increased risk of bleeding and an increased risk of rhabdomyolysis
251	Electronic	DIPYRONE -- ENALAPRIL MALEATE	Not Specified	Moderate	Excellent	Concurrent use of ACE INHIBITORS AND ANGIOTENSIN RECEPTOR BLOCKERS and NSAIDS may result in renal dysfunction and/or increased blood pressure
251	Electronic	ENALAPRIL MALEATE -- INSULIN HUMAN REGULAR	Not Specified	Moderate	Fair	Concurrent use of ACE INHIBITORS and ANTIDIABETIC AGENTS may result in increased risk of hypoglycemia
251	Electronic	PHENYTOIN -- SIMVASTATIN	Delayed	Moderate	Good	Concurrent use of PHENYTOIN and SIMVASTATIN may result in loss of simvastatin efficacy.
251	Electronic	PHENYTOIN -- WARFARIN SODIUM	Delayed	Moderate	Fair	Concurrent use of PHENYTOIN and WARFARIN may result in a transient increased risk of bleeding when starting phenytoin during warfarin therapy, but a decreased anticoagulant effect during continued warfarin therapy
252	Electronic	AMLODIPINE BESYLATE -- CLOPIDOGREL HYDROGEN SULFATE	Not Specified	Major	Excellent	Concurrent use of AMLODIPINE and CLOPIDOGREL may result in decreased antiplatelet effect and increased risk of thrombotic events
252	Electronic	AMLODIPINE BESYLATE -- SIMVASTATIN	Rapid	Major	Good	Concurrent use of AMLODIPINE and SIMVASTATIN may result in increased simvastatin exposure and increased risk of myopathy, including rhabdomyolysis
252	Electronic	ASPIRIN -- CLOPIDOGREL HYDROGEN SULFATE	Not Specified	Major	Fair	Concurrent use of ASPIRIN and CLOPIDOGREL may result in an increased risk of bleeding
252	Electronic	ASPIRIN -- DIPYRONE	Not Specified	Major	Excellent	Concurrent use of ASPIRIN and DIPYRONE may result in reduced efficacy of aspirin
252	Electronic	ASPIRIN -- METFORMIN HYDROCHLORIDE	Not Specified	Major	Fair	Concurrent use of ASPIRIN and ORAL HYPOGLYCEMICS may result in increased risk of hypoglycemia
252	Electronic	CLOPIDOGREL HYDROGEN SULFATE -- DIPYRONE	Not Specified	Major	Fair	Concurrent use of ANTIPLATELET AGENTS and NSAIDS may result in increased risk of bleeding
252	Electronic	CLOPIDOGREL HYDROGEN SULFATE -- ENOXAPARIN SODIUM	Not Specified	Major	Fair	Concurrent use of ANTIPLATELETS and LOW MOLECULAR WEIGHT HEPARIN may result in increased risk of bleeding
252	Electronic	DIPYRONE -- ENOXAPARIN SODIUM	Not Specified	Major	Good	Concurrent use of LOW-MOLECULAR-WEIGHT HEPARINS and NSAIDS may result in an increased risk of bleeding
252	Electronic	ASPIRIN -- ENALAPRIL MALEATE	Rapid	Moderate	Excellent	Concurrent use of ASPIRIN and ENALAPRIL may result in decreased effectiveness of enalapril
252	Electronic	CLOPIDOGREL HYDROGEN SULFATE -- SIMVASTATIN	Not Specified	Moderate	Excellent	Concurrent use of CLOPIDOGREL and CYP3A4 METABOLIZED STATINS may result in decreased formation of clopidogrel active metabolite resulting in high on-treatment platelet reactivity
252	Electronic	DIPYRONE -- ENALAPRIL MALEATE	Not Specified	Moderate	Excellent	Concurrent use of ACE INHIBITORS AND ANGIOTENSIN RECEPTOR BLOCKERS and NSAIDS may result in renal dysfunction and/or increased blood pressure
252	Electronic	ENALAPRIL MALEATE -- METFORMIN HYDROCHLORIDE	Not Specified	Moderate	Fair	Concurrent use of ACE INHIBITORS and ANTIDIABETIC AGENTS may result in increased risk of hypoglycemia
253	Electronic	DIPYRONE -- HEPARIN SODIUM	Not Specified	Major	Fair	Concurrent use of ANTICOAGULANTS and NSAIDS may result in increased risk of bleeding
254	Electronic	ASPIRIN -- DIPYRONE	Not Specified	Major	Excellent	Concurrent use of ASPIRIN and DIPYRONE may result in reduced efficacy of aspirin.
254	Electronic	ASPIRIN -- HEPARIN SODIUM	Not Specified	Major	Fair	Concurrent use of ANTICOAGULANTS and ANTIPLATELET AGENTS may result in increased risk of bleeding
254	Electronic	DIPYRONE -- HEPARIN SODIUM	Not Specified	Major	Fair	Concurrent use of ANTICOAGULANTS and NSAIDS may result in increased risk of bleeding
255	Electronic	BROMOPRIDE -- RISPERIDONE	Not Specified	Contraindicated	Fair	Concurrent use of BROMOPRIDE and DRUGS THAT CAUSE EXTRAPYRAMIDAL REACTIONS may result in increased risk of extrapyramidal reactions
255	Electronic	BROMOPRIDE -- SERTRALINE HYDROCHLORIDE	Not Specified	Contraindicated	Fair	Concurrent use of BROMOPRIDE and DRUGS THAT CAUSE EXTRAPYRAMIDAL REACTIONS may result in increased risk of extrapyramidal reactions
255	Electronic	BACLOFEN -- MORPHINE SULFATE	Not Specified	Major	Fair	Concurrent use of MORPHINE and CNS DEPRESSANTS may result in increased risk of respiratory and CNS depression
255	Electronic	BACLOFEN -- TRAMADOL HYDROCHLORIDE	Not Specified	Major	Fair	Concurrent use of TRAMADOL and CNS DEPRESSANTS may result in increased risk of respiratory and CNS depression
255	Electronic	BROMOPRIDE -- CLONAZEPAM	Not Specified	Major	Fair	Concurrent use of BROMOPRIDE and SEDATIVES may result in potentiation of sedative effects
255	Electronic	BROMOPRIDE -- MORPHINE SULFATE	Not Specified	Major	Fair	Concurrent use of BROMOPRIDE and OPIOID ANALGESICS may result in potentiation of sedative effects
255	Electronic	BROMOPRIDE -- TRAMADOL HYDROCHLORIDE	Not Specified	Major	Fair	Concurrent use of BROMOPRIDE and OPIOID ANALGESICS may result in potentiation of sedative effects
255	Electronic	CLONAZEPAM -- MORPHINE SULFATE	Not Specified	Major	Fair	Concurrent use of MORPHINE and CNS DEPRESSANTS may result in increased risk of respiratory and CNS depression
255	Electronic	CLONAZEPAM -- TRAMADOL HYDROCHLORIDE	Not Specified	Major	Fair	Concurrent use of TRAMADOL and CNS DEPRESSANTS may result in increased risk of respiratory and CNS depression
255	Electronic	DIPYRONE -- HEPARIN SODIUM	Not Specified	Major	Fair	Concurrent use of ANTICOAGULANTS and NSAIDS may result in increased risk of bleeding
255	Electronic	DIPYRONE -- PREDNISONE	Not Specified	Major	Fair	Concurrent use of CORTICOSTEROIDS and NSAIDS may result in increased risk of gastrointestinal ulcer or bleeding
255	Electronic	DIPYRONE -- SERTRALINE HYDROCHLORIDE	Not Specified	Major	Excellent	Concurrent use of NSAID and SSRI may result in an increased risk of bleeding
255	Electronic	HEPARIN SODIUM -- SERTRALINE HYDROCHLORIDE	Delayed	Major	Good	Concurrent use of SERTRALINE and ANTICOAGULANTS may result in an increased risk of bleeding
255	Electronic	MORPHINE SULFATE -- SERTRALINE HYDROCHLORIDE	Not Specified	Major	Fair	Concurrent use of MORPHINE and SEROTONERGIC AGENTS may result in increased risk of serotonin syndrome
255	Electronic	PHENYTOIN -- SERTRALINE HYDROCHLORIDE	Not Specified	Major	Good	Concurrent use of PHENYTOIN and SERTRALINE may result in increased risk of phenytoin toxicity and decreased efficacy of sertraline
255	Electronic	PHENYTOIN -- TRAMADOL HYDROCHLORIDE	Not Specified	Major	Fair	Concurrent use of TRAMADOL and CYP3A4 INDUCERS may result in reduced tramadol exposure
255	Electronic	PREDNISONE -- TRAMADOL HYDROCHLORIDE	Not Specified	Major	Fair	Concurrent use of TRAMADOL and CYP3A4 INDUCERS may result in reduced tramadol exposure
255	Electronic	RANITIDINE HYDROCHLORIDE -- TRAMADOL HYDROCHLORIDE	Not Specified	Major	Fair	Concurrent use of TRAMADOL and CYP3A4 INHIBITORS may result in increased tramadol exposure and increased risk of respiratory depression
255	Electronic	RISPERIDONE -- SERTRALINE HYDROCHLORIDE	Not Specified	Major	Fair	Concurrent use of RISPERIDONE and SERTRALINE may result in increased risperidone exposure and risk of QT interval prolongation
255	Electronic	SERTRALINE HYDROCHLORIDE -- TRAMADOL HYDROCHLORIDE	Not Specified	Major	Fair	Concurrent use of TRAMADOL and SEROTONERGIC CYP2D6 INHIBITORS may result in increased tramadol exposure and reduced concentrations of the active metabolite
255	Electronic	PHENYTOIN -- PREDNISONE	Delayed	Moderate	Good	Concurrent use of PHENYTOIN and PREDNISONE may result in decreased predniSONE effectiveness
255	Electronic	PHENYTOIN -- RISPERIDONE	Delayed	Moderate	Good	Concurrent use of RISPERIDONE and STRONG CYP3A4 INDUCERS may result in decreased plasma concentrations of risperiDONE and the active metabolite 9-hydroxyrisperidone
255	Electronic	CLONAZEPAM -- PHENYTOIN	Delayed	Minor	Good	Concurrent use of CLONAZEPAM and PHENYTOIN may result in altered concentrations of either drug
255	Electronic	PHENYTOIN -- RANITIDINE HYDROCHLORIDE	Delayed	Minor	Good	Concurrent use of PHENYTOIN and RANITIDINE may result in increased phenytoin concentrations
255	Electronic	MORPHINE SULFATE -- TRAMADOL HYDROCHLORIDE	Not Specified	Major	Fair	Concurrent use of MORPHINE and SEROTONERGIC CNS DEPRESSANTS may result in increased risk of respiratory and CNS depression; increased risk of serotonin syndrome
255	Electronic	RISPERIDONE -- RANITIDINE HYDROCHLORIDE	Not Specified	Moderate	Good	Concurrent use of RANITIDINE and RISPERIDONE may result in increased risperiDONE bioavailability
256	Electronic	ASPIRIN -- METFORMIN HYDROCHLORIDE	Not Specified	Major	Fair	Concurrent use of ASPIRIN and ORAL HYPOGLYCEMICS may result in increased risk of hypoglycemia
256	Electronic	ASPIRIN -- INSULIN HUMAN ISOPHANE (NPH)	Not Specified	Moderate	Fair	Concurrent use of INSULIN OR PRAMLINTIDE and SALICYLATES may result in increased risk of hypoglycemia
256	Electronic	ASPIRIN -- INSULIN HUMAN REGULAR	Not Specified	Moderate	Fair	Concurrent use of INSULIN OR PRAMLINTIDE and SALICYLATES may result in increased risk of hypoglycemia
256	Electronic	INSULIN HUMAN ISOPHANE (NPH) -- METFORMIN HYDROCHLORIDE	Not Specified	Moderate	Fair	Concurrent use of INSULIN OR PRAMLINTIDE and ORAL ANTIDIABETIC AGENTS may result in increased risk of hypoglycemia
256	Electronic	INSULIN HUMAN REGULAR -- METFORMIN HYDROCHLORIDE	Not Specified	Moderate	Fair	Concurrent use of INSULIN OR PRAMLINTIDE and ORAL ANTIDIABETIC AGENTS may result in increased risk of hypoglycemia
257	Electronic	BROMOPRIDE -- HALOPERIDOL	Not Specified	Contraindicated	Fair	Concurrent use of BROMOPRIDE and DRUGS THAT CAUSE EXTRAPYRAMIDAL REACTIONS may result in increased risk of extrapyramidal reactions
257	Electronic	DIPYRONE -- HEPARIN SODIUM	Not Specified	Major	Fair	Concurrent use of ANTICOAGULANTS and NSAIDS may result in increased risk of bleeding
258	Electronic	BROMOPRIDE -- RISPERIDONE	Not Specified	Contraindicated	Fair	Concurrent use of BROMOPRIDE and DRUGS THAT CAUSE EXTRAPYRAMIDAL REACTIONS may result in increased risk of extrapyramidal reactions
258	Electronic	ASPIRIN -- DIPYRONE	Not Specified	Major	Excellent	Concurrent use of ASPIRIN and DIPYRONE may result in reduced efficacy of aspirin
258	Electronic	ASPIRIN -- HEPARIN SODIUM	Not Specified	Major	Fair	Concurrent use of ANTICOAGULANTS and ANTIPLATELET AGENTS may result in increased risk of bleeding
258	Electronic	ASPIRIN -- HYDROCHLOROTHIAZIDE	Delayed	Major	Good	Concurrent use of NSAIDS and THIAZIDE DIURETICS may result in reduced diuretic effectiveness and possible nephrotoxicity
258	Electronic	DIPYRONE -- HEPARIN SODIUM	Not Specified	Major	Fair	Concurrent use of ANTICOAGULANTS and NSAIDS may result in increased risk of bleeding
258	Electronic	DIPYRONE -- HYDROCHLOROTHIAZIDE	Delayed	Major	Good	Concurrent use of NSAIDS and THIAZIDE DIURETICS may result in reduced diuretic effectiveness and possible nephrotoxicity
258	Electronic	ASPIRIN -- ENALAPRIL MALEATE	Rapid	Moderate	Excellent	Concurrent use of ASPIRIN and ENALAPRIL may result in decreased effectiveness of enalapril
258	Electronic	DIPYRONE -- ENALAPRIL MALEATE	Not Specified	Moderate	Excellent	Concurrent use of ACE INHIBITORS AND ANGIOTENSIN RECEPTOR BLOCKERS and NSAIDS may result in renal dysfunction and/or increased blood pressure
258	Electronic	ENALAPRIL MALEATE -- HYDROCHLOROTHIAZIDE	Rapid	Moderate	Fair	Concurrent use of ACE INHIBITORS and THIAZIDE DIURETICS may result in reduction of blood pressure
259	Electronic	DIPYRONE -- FUROSEMIDE	Not Specified	Major	Good	Concurrent use of LOOP DIURETICS and NSAIDS may result in reduced diuretic effectiveness and possible nephrotoxicity
259	Electronic	DIPYRONE -- HEPARIN SODIUM	Not Specified	Major	Fair	Concurrent use of ANTICOAGULANTS and NSAIDS may result in increased risk of bleeding
259	Electronic	DIPYRONE -- HYDROCORTISONE	Not Specified	Major	Fair	Concurrent use of CORTICOSTEROIDS and NSAIDS may result in increased risk of gastrointestinal ulcer or bleeding
259	Electronic	MORPHINE SULFATE -- ONDANSETRON	Not Specified	Major	Fair	Concurrent use of MORPHINE and SEROTONERGIC AGENTS may result in increased risk of serotonin syndrome
259	Electronic	DIPYRONE -- LOSARTAN POTASSIUM	Not Specified	Moderate	Excellent	Concurrent use of ACE INHIBITORS AND ANGIOTENSIN RECEPTOR BLOCKERS and NSAIDS may result in renal dysfunction and/or increased blood pressure
259	Electronic	FUROSEMIDE -- HYDROCORTISONE	Delayed	Moderate	Fair	Concurrent use of FUROSEMIDE and HYDROCORTISONE may result in hypokalemia
259	Electronic	FUROSEMIDE -- MORPHINE SULFATE	Not Specified	Moderate	Fair	Concurrent use of MORPHINE and DIURETICS may result in decreased efficacy of diuretics
260	Electronic	MORPHINE SULFATE -- ONDANSETRON	Not Specified	Major	Fair	Concurrent use of MORPHINE and SEROTONERGIC AGENTS may result in increased risk of serotonin syndrome
260	Electronic	MORPHINE SULFATE -- PHENOBARBITAL	Not Specified	Major	Fair	Concurrent use of MORPHINE and CNS DEPRESSANTS may result in increased risk of respiratory and CNS depression
261	Electronic	BROMOPRIDE -- RISPERIDONE	Not Specified	Contraindicated	Fair	Concurrent use of BROMOPRIDE and DRUGS THAT CAUSE EXTRAPYRAMIDAL REACTIONS may result in increased risk of extrapyramidal reactions
261	Electronic	BACLOFEN -- TRAMADOL HYDROCHLORIDE	Not Specified	Major	Fair	Concurrent use of TRAMADOL and CNS DEPRESSANTS may result in increased risk of respiratory and CNS depression
261	Electronic	BROMOPRIDE -- DIAZEPAM	Not Specified	Major	Fair	Concurrent use of BROMOPRIDE and SEDATIVES may result in potentiation of sedative effects
261	Electronic	BROMOPRIDE -- TRAMADOL HYDROCHLORIDE	Not Specified	Major	Fair	Concurrent use of BROMOPRIDE and OPIOID ANALGESICS may result in potentiation of sedative effects
261	Electronic	DIAZEPAM -- TRAMADOL HYDROCHLORIDE	Not Specified	Major	Fair	Concurrent use of TRAMADOL and CNS DEPRESSANTS may result in increased risk of respiratory and CNS depression
261	Electronic	DIPYRONE -- HEPARIN SODIUM	Not Specified	Major	Fair	Concurrent use of ANTICOAGULANTS and NSAIDS may result in increased risk of bleeding
261	Electronic	RANITIDINE HYDROCHLORIDE -- TRAMADOL HYDROCHLORIDE	Not Specified	Major	Fair	Concurrent use of TRAMADOL and CYP3A4 INHIBITORS may result in increased tramadol exposure and increased risk of respiratory depression
261	Electronic	RISPERIDONE -- RANITIDINE HYDROCHLORIDE	Not Specified	Moderate	Good	Concurrent use of RANITIDINE and RISPERIDONE may result in increased risperiDONE bioavailability
262	Electronic	BROMOPRIDE -- HALOPERIDOL	Not Specified	Contraindicated	Fair	Concurrent use of BROMOPRIDE and DRUGS THAT CAUSE EXTRAPYRAMIDAL REACTIONS may result in increased risk of extrapyramidal reactions
262	Electronic	BROMOPRIDE -- MORPHINE SULFATE	Not Specified	Major	Fair	Concurrent use of BROMOPRIDE and OPIOID ANALGESICS may result in potentiation of sedative effects
262	Electronic	BROMOPRIDE -- TRAMADOL HYDROCHLORIDE	Not Specified	Major	Fair	Concurrent use of BROMOPRIDE and OPIOID ANALGESICS may result in potentiation of sedative effects
262	Electronic	DIPYRONE -- HEPARIN SODIUM	Not Specified	Major	Fair	Concurrent use of ANTICOAGULANTS and NSAIDS may result in increased risk of bleeding
262	Electronic	HALOPERIDOL -- MORPHINE SULFATE	Not Specified	Major	Fair	Concurrent use of MORPHINE and CNS DEPRESSANTS may result in increased risk of respiratory and CNS depression
262	Electronic	HALOPERIDOL -- TRAMADOL HYDROCHLORIDE	Not Specified	Major	Fair	Concurrent use of TRAMADOL and CNS DEPRESSANTS may result in increased risk of respiratory and CNS depression
262	Electronic	MORPHINE SULFATE -- TRAMADOL HYDROCHLORIDE	Not Specified	Major	Fair	Concurrent use of MORPHINE and SEROTONERGIC CNS DEPRESSANTS may result in increased risk of respiratory and CNS depression; increased risk of serotonin syndrome
263	Electronic	ASPIRIN -- CLOPIDOGREL HYDROGEN SULFATE	Not Specified	Major	Fair	Concurrent use of ASPIRIN and CLOPIDOGREL may result in an increased risk of bleeding
263	Electronic	ASPIRIN -- DIPYRONE	Not Specified	Major	Excellent	Concurrent use of ASPIRIN and DIPYRONE may result in reduced efficacy of aspirin
263	Electronic	ASPIRIN -- HEPARIN SODIUM	Not Specified	Major	Fair	Concurrent use of ANTICOAGULANTS and ANTIPLATELET AGENTS may result in increased risk of bleeding
263	Electronic	ASPIRIN -- HYDROCHLOROTHIAZIDE	Delayed	Major	Good	Concurrent use of NSAIDS and THIAZIDE DIURETICS may result in reduced diuretic effectiveness and possible nephrotoxicity
263	Electronic	CLOPIDOGREL HYDROGEN SULFATE -- DIPYRONE	Not Specified	Major	Fair	Concurrent use of ANTIPLATELET AGENTS and NSAIDS may result in increased risk of bleeding
263	Electronic	CLOPIDOGREL HYDROGEN SULFATE -- HEPARIN SODIUM	Not Specified	Major	Fair	Concurrent use of ANTICOAGULANTS and ANTIPLATELET AGENTS may result in increased risk of bleeding
263	Electronic	DIPYRONE -- HEPARIN SODIUM	Not Specified	Major	Fair	Concurrent use of ANTICOAGULANTS and NSAIDS may result in increased risk of bleeding
263	Electronic	DIPYRONE -- HYDROCHLOROTHIAZIDE	Delayed	Major	Good	Concurrent use of NSAIDS and THIAZIDE DIURETICS may result in reduced diuretic effectiveness and possible nephrotoxicity
263	Electronic	ASPIRIN -- ENALAPRIL MALEATE	Rapid	Moderate	Excellent	Concurrent use of ASPIRIN and ENALAPRIL may result in decreased effectiveness of enalapril
263	Electronic	ATORVASTATIN CALCIUM -- CLOPIDOGREL HYDROGEN SULFATE	Not Specified	Moderate	Excellent	Concurrent use of CLOPIDOGREL and CYP3A4 METABOLIZED STATINS may result in decreased formation of clopidogrel active metabolite resulting in high on-treatment platelet reactivity
263	Electronic	DIPYRONE -- ENALAPRIL MALEATE	Not Specified	Moderate	Excellent	Concurrent use of ACE INHIBITORS AND ANGIOTENSIN RECEPTOR BLOCKERS and NSAIDS may result in renal dysfunction and/or increased blood pressure
263	Electronic	ENALAPRIL MALEATE -- HYDROCHLOROTHIAZIDE	Rapid	Moderate	Fair	Concurrent use of ACE INHIBITORS and THIAZIDE DIURETICS may result in reduction of blood pressure
263	Electronic	ASPIRIN -- RANITIDINE HYDROCHLORIDE	Not Specified	Minor	Excellent	Concurrent use of ASPIRIN and RANITIDINE may result in reduced salicylate plasma levels and decreased antiplatelet effect of aspirin
264	Electronic	BROMOPRIDE -- RISPERIDONE	Not Specified	Contraindicated	Fair	Concurrent use of BROMOPRIDE and DRUGS THAT CAUSE EXTRAPYRAMIDAL REACTIONS may result in increased risk of extrapyramidal reactions
264	Electronic	ASPIRIN -- CLOPIDOGREL HYDROGEN SULFATE	Not Specified	Major	Fair	Concurrent use of ASPIRIN and CLOPIDOGREL may result in an increased risk of bleeding
264	Electronic	ASPIRIN -- DIPYRONE	Not Specified	Major	Excellent	Concurrent use of ASPIRIN and DIPYRONE may result in reduced efficacy of aspirin
264	Electronic	ASPIRIN -- HEPARIN SODIUM	Not Specified	Major	Fair	Concurrent use of ANTICOAGULANTS and ANTIPLATELET AGENTS may result in increased risk of bleeding
264	Electronic	CLOPIDOGREL HYDROGEN SULFATE -- DIPYRONE	Not Specified	Major	Fair	Concurrent use of ANTIPLATELET AGENTS and NSAIDS may result in increased risk of bleeding
264	Electronic	CLOPIDOGREL HYDROGEN SULFATE -- HEPARIN SODIUM	Not Specified	Major	Fair	Concurrent use of ANTICOAGULANTS and ANTIPLATELET AGENTS may result in increased risk of bleeding
264	Electronic	DIPYRONE -- HEPARIN SODIUM	Not Specified	Major	Fair	Concurrent use of ANTICOAGULANTS and NSAIDS may result in increased risk of bleeding
264	Electronic	DIPYRONE -- PREDNISONE	Not Specified	Major	Fair	Concurrent use of CORTICOSTEROIDS and NSAIDS may result in increased risk of gastrointestinal ulcer or bleeding
264	Electronic	ASPIRIN -- CAPTOPRIL	Rapid	Moderate	Excellent	Concurrent use of CAPTOPRIL and ASPIRIN may result in decreased captopril effectiveness
264	Electronic	ASPIRIN -- PREDNISONE	Delayed	Moderate	Good	Concurrent use of ASPIRIN and PREDNISONE may result in an increased risk of gastrointestinal ulceration and subtherapeutic aspirin serum concentrations
264	Electronic	CAPTOPRIL -- DIPYRONE	Not Specified	Moderate	Excellent	Concurrent use of ACE INHIBITORS AND ANGIOTENSIN RECEPTOR BLOCKERS and NSAIDS may result in renal dysfunction and/or increased blood pressure
264	Electronic	RISPERIDONE -- RANITIDINE HYDROCHLORIDE	Not Specified	Moderate	Good	Concurrent use of RANITIDINE and RISPERIDONE may result in increased risperiDONE bioavailability
264	Electronic	ASPIRIN -- RANITIDINE HYDROCHLORIDE	Not Specified	Minor	Excellent	Concurrent use of ASPIRIN and RANITIDINE may result in reduced salicylate plasma levels and decreased antiplatelet effect of aspirin
265	Electronic	BROMOPRIDE -- TRAMADOL HYDROCHLORIDE	Not Specified	Major	Fair	Concurrent use of BROMOPRIDE and OPIOID ANALGESICS may result in potentiation of sedative effects
265	Electronic	DIPYRONE -- HEPARIN SODIUM	Not Specified	Major	Fair	Concurrent use of ANTICOAGULANTS and NSAIDS may result in increased risk of bleeding
265	Electronic	PHENYTOIN -- TRAMADOL HYDROCHLORIDE	Not Specified	Major	Fair	Concurrent use of TRAMADOL and CYP3A4 INDUCERS may result in reduced tramadol exposure
266	Electronic	BROMOPRIDE -- RISPERIDONE	Not Specified	Contraindicated	Fair	Concurrent use of BROMOPRIDE and DRUGS THAT CAUSE EXTRAPYRAMIDAL REACTIONS may result in increased risk of extrapyramidal reactions
266	Electronic	AMLODIPINE BESYLATE -- SIMVASTATIN	Rapid	Major	Good	Concurrent use of AMLODIPINE and SIMVASTATIN may result in increased simvastatin exposure and increased risk of myopathy, including rhabdomyolysis
266	Electronic	ASPIRIN -- DIPYRONE	Not Specified	Major	Excellent	Concurrent use of ASPIRIN and DIPYRONE may result in reduced efficacy of aspirin
266	Electronic	ASPIRIN -- HEPARIN SODIUM	Not Specified	Major	Fair	Concurrent use of ANTICOAGULANTS and ANTIPLATELET AGENTS may result in increased risk of bleeding
266	Electronic	DIPYRONE -- HEPARIN SODIUM	Not Specified	Major	Fair	Concurrent use of ANTICOAGULANTS and NSAIDS may result in increased risk of bleeding.
266	Electronic	RISPERIDONE -- SIMVASTATIN	Delayed	Major	Good	Concurrent use of RISPERIDONE and SIMVASTATIN may result in increased simvastatin serum concentrations with an increased risk of myopathy or rhabdomyolysis
266	Electronic	DIPYRONE -- LOSARTAN POTASSIUM	Not Specified	Moderate	Excellent	Concurrent use of ACE INHIBITORS AND ANGIOTENSIN RECEPTOR BLOCKERS and NSAIDS may result in renal dysfunction and/or increased blood pressure
267	Electronic	BROMOPRIDE -- PHENOBARBITAL	Not Specified	Major	Fair	Concurrent use of BROMOPRIDE and SEDATIVES may result in potentiation of sedative effects
267	Electronic	BROMOPRIDE -- TRAMADOL HYDROCHLORIDE	Not Specified	Major	Fair	Concurrent use of BROMOPRIDE and OPIOID ANALGESICS may result in potentiation of sedative effects
267	Electronic	CARBAMAZEPINE -- TRAMADOL HYDROCHLORIDE	Not Specified	Major	Fair	Concurrent use of TRAMADOL and SEROTONERGIC CYP3A4 INDUCERS may result in increased risk of serotonin syndrome and reduced tramadol plasma concentrations
267	Electronic	CLOBAZAM -- PHENOBARBITAL	Not Specified	Major	Good	Concurrent use of BARBITURATES and BENZODIAZEPINES may result in additive respiratory depression
267	Electronic	CLOBAZAM -- TRAMADOL HYDROCHLORIDE	Not Specified	Major	Fair	Concurrent use of TRAMADOL and CNS DEPRESSANTS may result in increased risk of respiratory and CNS depression
267	Electronic	DIPYRONE -- ENOXAPARIN SODIUM	Not Specified	Major	Good	Concurrent use of LOW-MOLECULAR-WEIGHT HEPARINS and NSAIDS may result in an increased risk of bleeding.
267	Electronic	PHENOBARBITAL -- TRAMADOL HYDROCHLORIDE	Not Specified	Major	Fair	Concurrent use of TRAMADOL and PHENOBARBITAL may result in increased risk of CNS depression and decreased plasma concentrations of tramadol
267	Electronic	RANITIDINE HYDROCHLORIDE -- TRAMADOL HYDROCHLORIDE	Not Specified	Major	Fair	Concurrent use of TRAMADOL and CYP3A4 INHIBITORS may result in increased tramadol exposure and increased risk of respiratory depression
267	Electronic	TOPIRAMATE -- TRAMADOL HYDROCHLORIDE	Not Specified	Major	Fair	Concurrent use of TRAMADOL and CNS DEPRESSANTS may result in increased risk of respiratory and CNS depression
267	Electronic	CARBAMAZEPINE -- PHENOBARBITAL	Delayed	Moderate	Good	Concurrent use of CARBAMAZEPINE and PHENOBARBITAL may result in decreased carbamazepine exposure and potential loss of efficacy.
267	Electronic	CARBAMAZEPINE -- TOPIRAMATE	Delayed	Moderate	Good	Concurrent use of CARBAMAZEPINE and TOPIRAMATE may result in decreased topiramate concentrations
267	Electronic	CARBAMAZEPINE -- RANITIDINE HYDROCHLORIDE	Not Specified	Moderate	Fair	Concurrent use of CARBAMAZEPINE and CYP3A4 INHIBITORS may result in increased carbamazepine exposure
267	Electronic	PHENOBARBITAL -- TOPIRAMATE	Delayed	Moderate	Good	Concurrent use of PHENOBARBITAL and TOPIRAMATE may result in a decrease in serum concentrations of topiramate
267	Electronic	CARBAMAZEPINE -- CLOBAZAM	Delayed	Minor	Good	Concurrent use of CLOBAZAM and CARBAMAZEPINE may result in decreased carbamazepine parent drug and/or increased active metabolite concentrations
268	Electronic	BROMOPRIDE -- RISPERIDONE	Not Specified	Contraindicated	Fair	Concurrent use of BROMOPRIDE and DRUGS THAT CAUSE EXTRAPYRAMIDAL REACTIONS may result in increased risk of extrapyramidal reactions
268	Electronic	ASPIRIN -- DIPYRONE	Not Specified	Major	Excellent	Concurrent use of ASPIRIN and DIPYRONE may result in reduced efficacy of aspirin
268	Electronic	ASPIRIN -- HEPARIN SODIUM	Not Specified	Major	Fair	Concurrent use of ANTICOAGULANTS and ANTIPLATELET AGENTS may result in increased risk of bleeding
268	Electronic	ASPIRIN -- HYDROCHLOROTHIAZIDE	Delayed	Major	Good	Concurrent use of NSAIDS and THIAZIDE DIURETICS may result in reduced diuretic effectiveness and possible nephrotoxicity
268	Electronic	DIPYRONE -- HEPARIN SODIUM	Not Specified	Major	Fair	Concurrent use of ANTICOAGULANTS and NSAIDS may result in increased risk of bleeding
268	Electronic	DIPYRONE -- HYDROCHLOROTHIAZIDE	Delayed	Major	Good	Concurrent use of NSAIDS and THIAZIDE DIURETICS may result in reduced diuretic effectiveness and possible nephrotoxicity
268	Electronic	ONDANSETRON -- RISPERIDONE	Not Specified	Major	Fair	Concurrent use of ONDANSETRON and QT INTERVAL PROLONGING DRUGS may result in an increased risk of QT interval prolongation
268	Electronic	DIPYRONE -- LOSARTAN POTASSIUM	Not Specified	Moderate	Excellent	Concurrent use of ACE INHIBITORS AND ANGIOTENSIN RECEPTOR BLOCKERS and NSAIDS may result in renal dysfunction and/or increased blood pressure
268	Electronic	LOSARTAN POTASSIUM -- POTASSIUM CHLORIDE	Delayed	Moderate	Fair	Concurrent use of POTASSIUM and ANGIOTENSIN II RECEPTOR BLOCKERS may result in hyperkalemia
269	Electronic	ASPIRIN -- DIPYRONE	Not Specified	Major	Excellent	Concurrent use of ASPIRIN and DIPYRONE may result in reduced efficacy of aspirin
269	Electronic	ASPIRIN -- FUROSEMIDE	Not Specified	Major	Good	Concurrent use of LOOP DIURETICS and NSAIDS may result in reduced diuretic effectiveness and possible nephrotoxicity
269	Electronic	ASPIRIN -- HEPARIN SODIUM	Not Specified	Major	Fair	Concurrent use of ANTICOAGULANTS and ANTIPLATELET AGENTS may result in increased risk of bleeding
269	Electronic	ASPIRIN -- HYDROCHLOROTHIAZIDE	Delayed	Major	Good	Concurrent use of NSAIDS and THIAZIDE DIURETICS may result in reduced diuretic effectiveness and possible nephrotoxicity
269	Electronic	DIPYRONE -- FUROSEMIDE	Not Specified	Major	Good	Concurrent use of LOOP DIURETICS and NSAIDS may result in reduced diuretic effectiveness and possible nephrotoxicity
269	Electronic	DIPYRONE -- HEPARIN SODIUM	Not Specified	Major	Fair	Concurrent use of ANTICOAGULANTS and NSAIDS may result in increased risk of bleeding
269	Electronic	DIPYRONE -- HYDROCHLOROTHIAZIDE	Delayed	Major	Good	Concurrent use of NSAIDS and THIAZIDE DIURETICS may result in reduced diuretic effectiveness and possible nephrotoxicity
269	Electronic	ASPIRIN -- METOPROLOL SUCCINATE	Delayed	Moderate	Good	Concurrent use of BETA-ADRENERGIC BLOCKERS and NSAIDS may result in increased blood pressure
269	Electronic	DIPYRONE -- METOPROLOL SUCCINATE	Delayed	Moderate	Good	Concurrent use of BETA-ADRENERGIC BLOCKERS and NSAIDS may result in increased blood pressure
269	Electronic	METOPROLOL SUCCINATE -- HYDRALAZINE HYDROCHLORIDE	Not Specified	Moderate	Fair	Concurrent use of HYDRALAZINE and METOPROLOL may result in increased metoprolol concentrations
269	Electronic	FUROSEMIDE -- HYDRALAZINE HYDROCHLORIDE	Rapid	Minor	Good	Concurrent use of FUROSEMIDE and HYDRALAZINE may result in an enhanced diuretic response to furosemide
270	Electronic	BROMOPRIDE -- CLONAZEPAM	Not Specified	Major	Fair	Concurrent use of BROMOPRIDE and SEDATIVES may result in potentiation of sedative effects
270	Electronic	BROMOPRIDE -- MORPHINE SULFATE	Not Specified	Major	Fair	Concurrent use of BROMOPRIDE and OPIOID ANALGESICS may result in potentiation of sedative effects
270	Electronic	CLONAZEPAM -- MORPHINE SULFATE	Not Specified	Major	Fair	Concurrent use of MORPHINE and CNS DEPRESSANTS may result in increased risk of respiratory and CNS depression
270	Electronic	DIPYRONE -- EFAVIRENZ/ LAMIVUDINE/ TENOFOVIR DISOPROXIL FUMARATE	Delayed	Major	Excellent	Concurrent use of TENOFOVIR DISOPROXIL FUMARATE and NSAIDS may result in increased risk of acute renal failure
270	Electronic	DIPYRONE -- ENOXAPARIN SODIUM	Not Specified	Major	Good	Concurrent use of LOW-MOLECULAR-WEIGHT HEPARINS and NSAIDS may result in an increased risk of bleeding
270	Electronic	DIPYRONE -- HYDROCORTISONE	Not Specified	Major	Fair	Concurrent use of CORTICOSTEROIDS and NSAIDS may result in increased risk of gastrointestinal ulcer or bleeding
270	Electronic	EFAVIRENZ/ LAMIVUDINE/ TENOFOVIR DISOPROXIL FUMARATE -- ONDANSETRON	Not Specified	Major	Fair	Concurrent use of EFAVIRENZ and QT-PROLONGING DRUGS may result in increased risk of QT interval prolongation
270	Electronic	MORPHINE SULFATE -- ONDANSETRON	Not Specified	Major	Fair	Concurrent use of MORPHINE and SEROTONERGIC AGENTS may result in increased risk of serotonin syndrome
271	Electronic	ASPIRIN -- DIPYRONE	Not Specified	Major	Excellent	Concurrent use of ASPIRIN and DIPYRONE may result in reduced efficacy of aspirin
271	Electronic	INSULIN HUMAN REGULAR -- METOCLOPRAMIDE HYDROCHLORIDE	Not Specified	Major	Fair	Concurrent use of METOCLOPRAMIDE and INSULINS may result in risk of hyperglycemia
271	Electronic	ASPIRIN -- INSULIN HUMAN REGULAR	Not Specified	Moderate	Fair	Concurrent use of INSULIN OR PRAMLINTIDE and SALICYLATES may result in increased risk of hypoglycemia
271	Electronic	DIPYRONE -- LOSARTAN POTASSIUM	Not Specified	Moderate	Excellent	Concurrent use of ACE INHIBITORS AND ANGIOTENSIN RECEPTOR BLOCKERS and NSAIDS may result in renal dysfunction and/or increased blood pressure
271	Electronic	INSULIN HUMAN REGULAR -- LOSARTAN POTASSIUM	Not Specified	Moderate	Fair	Concurrent use of ANGIOTENSIN RECEPTOR BLOCKERS and INSULIN may result in increased risk of hypoglycemia
272	Electronic	BROMOPRIDE -- FLUOXETINE HYDROCHLORIDE	Not Specified	Contraindicated	Fair	Concurrent use of BROMOPRIDE and DRUGS THAT CAUSE EXTRAPYRAMIDAL REACTIONS may result in increased risk of extrapyramidal reactions
272	Electronic	ACETAMINOPHEN/ CODEINE PHOSPHATE -- BROMOPRIDE	Not Specified	Major	Fair	Concurrent use of BROMOPRIDE and OPIOID ANALGESICS may result in potentiation of sedative effects
272	Electronic	ACETAMINOPHEN/ CODEINE PHOSPHATE -- CLONAZEPAM	Not Specified	Major	Fair	Concurrent use of CODEINE and CNS DEPRESSANTS may result in increased risk of respiratory and CNS depression
272	Electronic	ACETAMINOPHEN/ CODEINE PHOSPHATE -- FLUOXETINE HYDROCHLORIDE	Not Specified	Major	Fair	Concurrent use of CODEINE and CYP2D6 INHIBITORS may result in increased codeine plasma concentrations and reduced plasma concentrations of the active metabolite
272	Electronic	BROMOPRIDE -- CLONAZEPAM	Not Specified	Major	Fair	Concurrent use of BROMOPRIDE and SEDATIVES may result in potentiation of sedative effects
272	Electronic	DIPYRONE -- FLUOXETINE HYDROCHLORIDE	Not Specified	Major	Excellent	Concurrent use of NSAID and SSRI may result in an increased risk of bleeding.
272	Electronic	DIPYRONE -- HYDROCHLOROTHIAZIDE	Delayed	Major	Good	Concurrent use of NSAIDS and THIAZIDE DIURETICS may result in reduced diuretic effectiveness and possible nephrotoxicity
272	Electronic	DIPYRONE -- LOSARTAN POTASSIUM	Not Specified	Moderate	Excellent	Concurrent use of ACE INHIBITORS AND ANGIOTENSIN RECEPTOR BLOCKERS and NSAIDS may result in renal dysfunction and/or increased blood pressure
272	Electronic	FLUOXETINE HYDROCHLORIDE -- GLYBURIDE	Not Specified	Moderate	Fair	Concurrent use of FLUOXETINE and GLYBURIDE may result in excessive hypoglycemia
272	Electronic	GLYBURIDE -- HYDROCHLOROTHIAZIDE	Not Specified	Moderate	Fair	Concurrent use of ANTIDIABETIC AGENTS and SELECTED DIURETICS may result in increased hyperglycemia risk; increased insulin requirement
273	Electronic	None
274	Electronic	DIPYRONE -- HEPARIN SODIUM	Not Specified	Major	Fair	Concurrent use of ANTICOAGULANTS and NSAIDS may result in increased risk of bleeding
275	Electronic	BROMOPRIDE -- RISPERIDONE	Not Specified	Contraindicated	Fair	Concurrent use of BROMOPRIDE and DRUGS THAT CAUSE EXTRAPYRAMIDAL REACTIONS may result in increased risk of extrapyramidal reactions
275	Electronic	ASPIRIN -- DIPYRONE	Not Specified	Major	Excellent	Concurrent use of ASPIRIN and DIPYRONE may result in reduced efficacy of aspirin.
275	Electronic	ASPIRIN -- HEPARIN SODIUM	Not Specified	Major	Fair	Concurrent use of ANTICOAGULANTS and ANTIPLATELET AGENTS may result in increased risk of bleeding.
275	Electronic	DIPYRONE -- HEPARIN SODIUM	Not Specified	Major	Fair	Concurrent use of ANTICOAGULANTS and NSAIDS may result in increased risk of bleeding
275	Electronic	RISPERIDONE -- SIMVASTATIN	Delayed	Major	Good	Concurrent use of RISPERIDONE and SIMVASTATIN may result in increased simvastatin serum concentrations with an increased risk of myopathy or rhabdomyolysis.
275	Electronic	ASPIRIN -- INSULIN HUMAN ISOPHANE (NPH)	Not Specified	Moderate	Fair	Concurrent use of INSULIN OR PRAMLINTIDE and SALICYLATES may result in increased risk of hypoglycemia
275	Electronic	RISPERIDONE -- RANITIDINE HYDROCHLORIDE	Not Specified	Moderate	Good	Concurrent use of RANITIDINE and RISPERIDONE may result in increased risperiDONE bioavailability
275	Electronic	ASPIRIN -- RANITIDINE HYDROCHLORIDE	Not Specified	Minor	Excellent	Concurrent use of ASPIRIN and RANITIDINE may result in reduced salicylate plasma levels and decreased antiplatelet effect of aspirin
276	Electronic	ASPIRIN -- CLOPIDOGREL HYDROGEN SULFATE	Not Specified	Major	Fair	Concurrent use of ASPIRIN and CLOPIDOGREL may result in an increased risk of bleeding
276	Electronic	ASPIRIN -- DIPYRONE	Not Specified	Major	Excellent	Concurrent use of ASPIRIN and DIPYRONE may result in reduced efficacy of aspirin
276	Electronic	CLOPIDOGREL HYDROGEN SULFATE -- DIPYRONE	Not Specified	Major	Fair	Concurrent use of ANTIPLATELET AGENTS and NSAIDS may result in increased risk of bleeding
276	Electronic	CLOPIDOGREL HYDROGEN SULFATE -- ENOXAPARIN SODIUM	Not Specified	Major	Fair	Concurrent use of ANTIPLATELETS and LOW MOLECULAR WEIGHT HEPARIN may result in increased risk of bleeding
276	Electronic	DIPYRONE -- ENOXAPARIN SODIUM	Not Specified	Major	Good	Concurrent use of LOW-MOLECULAR-WEIGHT HEPARINS and NSAIDS may result in an increased risk of bleeding
276	Electronic	DIPYRONE -- PREDNISONE	Not Specified	Major	Fair	Concurrent use of CORTICOSTEROIDS and NSAIDS may result in increased risk of gastrointestinal ulcer or bleeding
276	Electronic	ASPIRIN -- PREDNISONE	Delayed	Moderate	Good	Concurrent use of ASPIRIN and PREDNISONE may result in an increased risk of gastrointestinal ulceration and subtherapeutic aspirin serum concentrations
276	Electronic	ATORVASTATIN CALCIUM -- CLOPIDOGREL HYDROGEN SULFATE	Not Specified	Moderate	Excellent	Concurrent use of CLOPIDOGREL and CYP3A4 METABOLIZED STATINS may result in decreased formation of clopidogrel active metabolite resulting in high on-treatment platelet reactivity
276	Electronic	ASPIRIN -- RANITIDINE HYDROCHLORIDE	Not Specified	Minor	Excellent	Concurrent use of ASPIRIN and RANITIDINE may result in reduced salicylate plasma levels and decreased antiplatelet effect of aspirin.
277	Electronic	BROMOPRIDE -- RISPERIDONE	Not Specified	Contraindicated	Fair	Concurrent use of BROMOPRIDE and DRUGS THAT CAUSE EXTRAPYRAMIDAL REACTIONS may result in increased risk of extrapyramidal reactions
277	Electronic	ASPIRIN -- DIPYRONE	Not Specified	Major	Excellent	Concurrent use of ASPIRIN and DIPYRONE may result in reduced efficacy of aspirin
277	Electronic	ASPIRIN -- HEPARIN SODIUM	Not Specified	Major	Fair	Concurrent use of ANTICOAGULANTS and ANTIPLATELET AGENTS may result in increased risk of bleeding
277	Electronic	DIPYRONE -- HEPARIN SODIUM	Not Specified	Major	Fair	Concurrent use of ANTICOAGULANTS and NSAIDS may result in increased risk of bleeding
277	Electronic	ASPIRIN -- INSULIN HUMAN REGULAR	Not Specified	Moderate	Fair	Concurrent use of INSULIN OR PRAMLINTIDE and SALICYLATES may result in increased risk of hypoglycemia
278	Electronic	BACLOFEN -- TRAMADOL HYDROCHLORIDE	Not Specified	Major	Fair	Concurrent use of TRAMADOL and CNS DEPRESSANTS may result in increased risk of respiratory and CNS depression
278	Electronic	BROMOPRIDE -- TRAMADOL HYDROCHLORIDE	Not Specified	Major	Fair	Concurrent use of BROMOPRIDE and OPIOID ANALGESICS may result in potentiation of sedative effects
278	Electronic	DIPYRONE -- HEPARIN SODIUM	Not Specified	Major	Fair	Concurrent use of ANTICOAGULANTS and NSAIDS may result in increased risk of bleeding
278	Electronic	ONDANSETRON -- TRAMADOL HYDROCHLORIDE	Not Specified	Major	Fair	Concurrent use of TRAMADOL and SEROTONERGIC AGENTS may result in increased risk of serotonin syndrome
279	Electronic	BROMOPRIDE -- HALOPERIDOL	Not Specified	Contraindicated	Fair	Concurrent use of BROMOPRIDE and DRUGS THAT CAUSE EXTRAPYRAMIDAL REACTIONS may result in increased risk of extrapyramidal reactions
279	Electronic	AMLODIPINE BESYLATE -- SIMVASTATIN	Rapid	Major	Good	Concurrent use of AMLODIPINE and SIMVASTATIN may result in increased simvastatin exposure and increased risk of myopathy, including rhabdomyolysis
279	Electronic	BROMOPRIDE -- LORAZEPAM	Not Specified	Major	Fair	Concurrent use of BROMOPRIDE and SEDATIVES may result in potentiation of sedative effects
279	Electronic	DIPYRONE -- HEPARIN SODIUM	Not Specified	Major	Fair	Concurrent use of ANTICOAGULANTS and NSAIDS may result in increased risk of bleeding
279	Electronic	DIPYRONE -- HYDROCHLOROTHIAZIDE	Delayed	Major	Good	Concurrent use of NSAIDS and THIAZIDE DIURETICS may result in reduced diuretic effectiveness and possible nephrotoxicity
279	Electronic	CAPTOPRIL -- DIPYRONE	Not Specified	Moderate	Excellent	Concurrent use of ACE INHIBITORS AND ANGIOTENSIN RECEPTOR BLOCKERS and NSAIDS may result in renal dysfunction and/or increased blood pressure
279	Electronic	CAPTOPRIL -- HYDROCHLOROTHIAZIDE	Rapid	Moderate	Fair	Concurrent use of ACE INHIBITORS and THIAZIDE DIURETICS may result in reduction of blood pressure
279	Electronic	CLONIDINE -- HALOPERIDOL	Not Specified	Moderate	Fair	Concurrent use of CLONIDINE and HALOPERIDOL may result in induction or exacerbation of orthostatic regulation disturbances and increased arrhythmogenic potential
280	Electronic	BROMOPRIDE -- RISPERIDONE	Not Specified	Contraindicated	Fair	Concurrent use of BROMOPRIDE and DRUGS THAT CAUSE EXTRAPYRAMIDAL REACTIONS may result in increased risk of extrapyramidal reactions
280	Electronic	AMLODIPINE BESYLATE -- SIMVASTATIN	Rapid	Major	Good	Concurrent use of AMLODIPINE and SIMVASTATIN may result in increased simvastatin exposure and increased risk of myopathy, including rhabdomyolysis
280	Electronic	BROMOPRIDE -- TRAMADOL HYDROCHLORIDE	Not Specified	Major	Fair	Concurrent use of BROMOPRIDE and OPIOID ANALGESICS may result in potentiation of sedative effects
280	Electronic	DIPYRONE -- FUROSEMIDE	Not Specified	Major	Good	Concurrent use of LOOP DIURETICS and NSAIDS may result in reduced diuretic effectiveness and possible nephrotoxicity
280	Electronic	DIPYRONE -- HEPARIN SODIUM	Not Specified	Major	Fair	Concurrent use of ANTICOAGULANTS and NSAIDS may result in increased risk of bleeding
280	Electronic	DIPYRONE -- SPIRONOLACTONE	Not Specified	Major	Good	Concurrent use of NSAIDS and POTASSIUM-SPARING DIURETICS may result in reduced diuretic effectiveness, hyperkalemia, or possible nephrotoxicity
280	Electronic	METRONIDAZOLE -- RISPERIDONE	Not Specified	Major	Fair	Concurrent use of METRONIDAZOLE and QT INTERVAL PROLONGING DRUGS may result in increased risk of QT-interval prolongation and arrhythmias
280	Electronic	RISPERIDONE -- SIMVASTATIN	Delayed	Major	Good	Concurrent use of RISPERIDONE and SIMVASTATIN may result in increased simvastatin serum concentrations with an increased risk of myopathy or rhabdomyolysis
280	Electronic	CARVEDILOL -- DIPYRONE	Delayed	Moderate	Good	Concurrent use of BETA-ADRENERGIC BLOCKERS and NSAIDS may result in increased blood pressure
280	Electronic	DIPYRONE -- LOSARTAN POTASSIUM	Not Specified	Moderate	Excellent	Concurrent use of ACE INHIBITORS AND ANGIOTENSIN RECEPTOR BLOCKERS and NSAIDS may result in renal dysfunction and/or increased blood pressure
280	Electronic	LOSARTAN POTASSIUM -- SPIRONOLACTONE	Not Specified	Moderate	Fair	Concurrent use of LOSARTAN and POTASSIUM-SPARING DIURETICS may result in increased risk of hyperkalemia
281	Electronic	ASPIRIN -- DIPYRONE	Not Specified	Major	Excellent	Concurrent use of ASPIRIN and DIPYRONE may result in reduced efficacy of aspirin
281	Electronic	ASPIRIN -- WARFARIN SODIUM	Not Specified	Major	Fair	Concurrent use of WARFARIN and ANTIPLATELET AGENTS may result in increased risk of bleeding
281	Electronic	DIPYRONE -- WARFARIN SODIUM	Not Specified	Major	Fair	Concurrent use of ANTICOAGULANTS and NSAIDS may result in increased risk of bleeding
281	Electronic	SIMVASTATIN -- WARFARIN SODIUM	Delayed	Major	Excellent	Concurrent use of SIMVASTATIN and WARFARIN may result in increased risk of bleeding and an increased risk of rhabdomyolysis
281	Electronic	ASPIRIN -- CARVEDILOL	Delayed	Moderate	Good	Concurrent use of BETA-ADRENERGIC BLOCKERS and NSAIDS may result in increased blood pressure
281	Electronic	ASPIRIN -- INSULIN HUMAN ISOPHANE (NPH)	Not Specified	Moderate	Fair	Concurrent use of INSULIN OR PRAMLINTIDE and SALICYLATES may result in increased risk of hypoglycemia
281	Electronic	CARVEDILOL -- DIPYRONE	Delayed	Moderate	Good	Concurrent use of BETA-ADRENERGIC BLOCKERS and NSAIDS may result in increased blood pressure
281	Electronic	CARVEDILOL -- INSULIN HUMAN ISOPHANE (NPH)	Delayed	Moderate	Good	Concurrent use of ANTIDIABETIC AGENTS and BETA-ADRENERGIC BLOCKERS may result in hypoglycemia or hyperglycemia; decreased symptoms of hypoglycemia.
281	Electronic	WARFARIN SODIUM -- RANITIDINE HYDROCHLORIDE	Delayed	Moderate	Good	Concurrent use of RANITIDINE and WARFARIN may result in an increased risk of bleeding
281	Electronic	ASPIRIN -- RANITIDINE HYDROCHLORIDE	Not Specified	Minor	Excellent	Concurrent use of ASPIRIN and RANITIDINE may result in reduced salicylate plasma levels and decreased antiplatelet effect of aspirin
282	Electronic	HALOPERIDOL -- METOCLOPRAMIDE HYDROCHLORIDE	Not Specified	Contraindicated	Fair	Concurrent use of METOCLOPRAMIDE and ANTIPSYCHOTICS may result in an increased risk of extrapyramidal reactions and neuroleptic malignant syndrome
282	Electronic	AMLODIPINE BESYLATE -- SIMVASTATIN	Rapid	Major	Good	Concurrent use of AMLODIPINE and SIMVASTATIN may result in increased simvastatin exposure and increased risk of myopathy, including rhabdomyolysis
282	Electronic	INSULIN HUMAN REGULAR -- METOCLOPRAMIDE HYDROCHLORIDE	Not Specified	Major	Fair	Concurrent use of METOCLOPRAMIDE and INSULINS may result in risk of hyperglycemia
282	Electronic	PHENYTOIN SODIUM -- SIMVASTATIN	Delayed	Moderate	Good	Concurrent use of PHENYTOIN and SIMVASTATIN may result in loss of simvastatin efficacy
282	Electronic	OMEPRAZOLE -- PHENYTOIN SODIUM	Delayed	Moderate	Fair	Concurrent use of OMEPRAZOLE and PHENYTOIN may result in an increased risk of phenytoin toxicity (ataxia, hyperreflexia, nystagmus, tremor).
283	Electronic	HALOPERIDOL -- METOCLOPRAMIDE HYDROCHLORIDE	Not Specified	Contraindicated	Fair	Concurrent use of METOCLOPRAMIDE and ANTIPSYCHOTICS may result in an increased risk of extrapyramidal reactions and neuroleptic malignant syndrome
283	Electronic	DIPYRONE -- HEPARIN SODIUM	Not Specified	Major	Fair	Concurrent use of ANTICOAGULANTS and NSAIDS may result in increased risk of bleeding
283	Electronic	HALOPERIDOL -- MORPHINE SULFATE	Not Specified	Major	Fair	Concurrent use of MORPHINE and CNS DEPRESSANTS may result in increased risk of respiratory and CNS depression
283	Electronic	INSULIN HUMAN REGULAR -- METOCLOPRAMIDE HYDROCHLORIDE	Not Specified	Major	Fair	Concurrent use of METOCLOPRAMIDE and INSULINS may result in risk of hyperglycemia
283	Electronic	METOCLOPRAMIDE HYDROCHLORIDE -- MORPHINE SULFATE	Not Specified	Major	Fair	Concurrent use of METOCLOPRAMIDE and CNS DEPRESSANTS may result in increased risk of CNS depression
283	Electronic	DIPYRONE -- LOSARTAN POTASSIUM	Not Specified	Major	Excellent	Concurrent use of ACE INHIBITORS AND ANGIOTENSIN RECEPTOR BLOCKERS and NSAIDS may result in renal dysfunction and/or increased blood pressure
283	Electronic	INSULIN HUMAN REGULAR -- LOSARTAN POTASSIUM	Not Specified	Moderate	Fair	Concurrent use of ANGIOTENSIN RECEPTOR BLOCKERS and INSULIN may result in increased risk of hypoglycemia
284	Electronic	BROMOPRIDE -- SERTRALINE HYDROCHLORIDE	Not Specified	Contraindicated	Fair	Concurrent use of BROMOPRIDE and DRUGS THAT CAUSE EXTRAPYRAMIDAL REACTIONS may result in increased risk of extrapyramidal reactions.
284	Electronic	METOCLOPRAMIDE HYDROCHLORIDE -- SERTRALINE HYDROCHLORIDE	Not Specified	Contraindicated	Fair	Concurrent use of METOCLOPRAMIDE and SSRIs may result in an increased risk of extrapyramidal reactions and neuroleptic malignant syndrome.
284	Electronic	AMLODIPINE BESYLATE -- SIMVASTATIN	Rapid	Major	Good	Concurrent use of AMLODIPINE and SIMVASTATIN may result in increased simvastatin exposure and increased risk of myopathy, including rhabdomyolysis
284	Electronic	ASPIRIN -- DIPYRONE	Not Specified	Major	Excellent	Concurrent use of ASPIRIN and DIPYRONE may result in reduced efficacy of aspirin
284	Electronic	ASPIRIN -- SERTRALINE HYDROCHLORIDE	Not Specified	Major	Excellent	Concurrent use of NSAID and SSRI may result in an increased risk of bleeding.
284	Electronic	CIPROFLOXACIN -- INSULIN HUMAN ISOPHANE (NPH)	Not Specified	Major	Fair	Concurrent use of FLUOROQUINOLONES and ANTIDIABETIC AGENTS may result in changes in blood glucose and increased risk of hypoglycemia or hyperglycemia
284	Electronic	CIPROFLOXACIN -- INSULIN HUMAN REGULAR	Not Specified	Major	Fair	Concurrent use of FLUOROQUINOLONES and ANTIDIABETIC AGENTS may result in changes in blood glucose and increased risk of hypoglycemia or hyperglycemia
284	Electronic	CIPROFLOXACIN -- METRONIDAZOLE	Not Specified	Major	Fair	Concurrent use of METRONIDAZOLE and QT INTERVAL PROLONGING DRUGS may result in increased risk of QT-interval prolongation and arrhythmias.
284	Electronic	CIPROFLOXACIN -- SERTRALINE HYDROCHLORIDE	Not Specified	Major	Fair	Concurrent use of SERTRALINE and QT INTERVAL PROLONGING DRUGS may result in increased risk of QT-interval prolongation
284	Electronic	CIPROFLOXACIN -- SIMVASTATIN	Not Specified	Major	Good	Concurrent use of CIPROFLOXACIN and SIMVASTATIN may result in an increased risk of myopathy or rhabdomyolysis
284	Electronic	DIPYRONE -- ENOXAPARIN SODIUM	Not Specified	Major	Good	Concurrent use of LOW-MOLECULAR-WEIGHT HEPARINS and NSAIDS may result in an increased risk of bleeding
284	Electronic	DIPYRONE -- SERTRALINE HYDROCHLORIDE	Not Specified	Major	Excellent	Concurrent use of NSAID and SSRI may result in an increased risk of bleeding
284	Electronic	ENOXAPARIN SODIUM -- SERTRALINE HYDROCHLORIDE	Delayed	Major	Good	Concurrent use of SERTRALINE and ANTICOAGULANTS may result in an increased risk of bleeding
284	Electronic	INSULIN HUMAN ISOPHANE (NPH) -- METOCLOPRAMIDE HYDROCHLORIDE	Not Specified	Major	Fair	Concurrent use of METOCLOPRAMIDE and INSULINS may result in risk of hyperglycemia
284	Electronic	INSULIN HUMAN REGULAR -- METOCLOPRAMIDE HYDROCHLORIDE	Not Specified	Major	Fair	Concurrent use of METOCLOPRAMIDE and INSULINS may result in risk of hyperglycemia
284	Electronic	METRONIDAZOLE -- SERTRALINE HYDROCHLORIDE	Not Specified	Major	Fair	Concurrent use of SERTRALINE and QT INTERVAL PROLONGING DRUGS may result in increased risk of QT-interval prolongation.
284	Electronic	ASPIRIN -- ENALAPRIL MALEATE	Rapid	Moderate	Excellent	Concurrent use of ASPIRIN and ENALAPRIL may result in decreased effectiveness of enalapril.
284	Electronic	ASPIRIN -- INSULIN HUMAN ISOPHANE (NPH)	Not Specified	Moderate	Fair	Concurrent use of INSULIN OR PRAMLINTIDE and SALICYLATES may result in increased risk of hypoglycemia
284	Electronic	ASPIRIN -- INSULIN HUMAN REGULAR	Not Specified	Moderate	Fair	Concurrent use of INSULIN OR PRAMLINTIDE and SALICYLATES may result in increased risk of hypoglycemia
284	Electronic	DIPYRONE -- ENALAPRIL MALEATE	Not Specified	Moderate	Excellent	Concurrent use of ACE INHIBITORS AND ANGIOTENSIN RECEPTOR BLOCKERS and NSAIDS may result in renal dysfunction and/or increased blood pressure
284	Electronic	ENALAPRIL MALEATE -- INSULIN HUMAN ISOPHANE (NPH)	Not Specified	Moderate	Fair	Concurrent use of ACE INHIBITORS and ANTIDIABETIC AGENTS may result in increased risk of hypoglycemia
284	Electronic	ENALAPRIL MALEATE -- INSULIN HUMAN REGULAR	Not Specified	Moderate	Fair	Concurrent use of ACE INHIBITORS and ANTIDIABETIC AGENTS may result in increased risk of hypoglycemia
285	Electronic	ASPIRIN -- DIPYRONE	Not Specified	Major	Excellent	Concurrent use of ASPIRIN and DIPYRONE may result in reduced efficacy of aspirin
285	Electronic	ASPIRIN -- HYDROCHLOROTHIAZIDE	Delayed	Major	Good	Concurrent use of NSAIDS and THIAZIDE DIURETICS may result in reduced diuretic effectiveness and possible nephrotoxicity
285	Electronic	DIPYRONE -- HYDROCHLOROTHIAZIDE	Delayed	Major	Good	Concurrent use of NSAIDS and THIAZIDE DIURETICS may result in reduced diuretic effectiveness and possible nephrotoxicity
285	Electronic	DIPYRONE -- LOSARTAN POTASSIUM	Not Specified	Moderate	Excellent	Concurrent use of ACE INHIBITORS AND ANGIOTENSIN RECEPTOR BLOCKERS and NSAIDS may result in renal dysfunction and/or increased blood pressure
286	Electronic	AMLODIPINE BESYLATE -- SIMVASTATIN	Rapid	Major	Good	Concurrent use of AMLODIPINE and SIMVASTATIN may result in increased simvastatin exposure and increased risk of myopathy, including rhabdomyolysis.
286	Electronic	ASPIRIN -- HYDROCHLOROTHIAZIDE	Delayed	Major	Good	Concurrent use of NSAIDS and THIAZIDE DIURETICS may result in reduced diuretic effectiveness and possible nephrotoxicity
286	Electronic	ASPIRIN -- INSULIN HUMAN REGULAR	Not Specified	Moderate	Fair	Concurrent use of INSULIN OR PRAMLINTIDE and SALICYLATES may result in increased risk of hypoglycemia
286	Electronic	HYDROCHLOROTHIAZIDE -- INSULIN HUMAN REGULAR	Not Specified	Moderate	Fair	Concurrent use of ANTIDIABETIC AGENTS and SELECTED DIURETICS may result in increased hyperglycemia risk; increased insulin requirement
286	Electronic	INSULIN HUMAN REGULAR -- LOSARTAN POTASSIUM	Not Specified	Moderate	Fair	Concurrent use of ANGIOTENSIN RECEPTOR BLOCKERS and INSULIN may result in increased risk of hypoglycemia
287	Electronic	INSULIN HUMAN REGULAR -- METOCLOPRAMIDE HYDROCHLORIDE	Not Specified	Major	Fair	Concurrent use of METOCLOPRAMIDE and INSULINS may result in risk of hyperglycemia
287	Electronic	DIPYRONE -- ENALAPRIL MALEATE	Not Specified	Moderate	Excellent	Concurrent use of ACE INHIBITORS AND ANGIOTENSIN RECEPTOR BLOCKERS and NSAIDS may result in renal dysfunction and/or increased blood pressure
287	Electronic	ENALAPRIL MALEATE -- INSULIN HUMAN REGULAR	Not Specified	Moderate	Fair	Concurrent use of ACE INHIBITORS and ANTIDIABETIC AGENTS may result in increased risk of hypoglycemia
288	Electronic	ASPIRIN -- CLOPIDOGREL HYDROGEN SULFATE	Not Specified	Major	Fair	Concurrent use of ASPIRIN and CLOPIDOGREL may result in an increased risk of bleeding
288	Electronic	ASPIRIN -- DIPYRONE	Not Specified	Major	Excellent	Concurrent use of ASPIRIN and DIPYRONE may result in reduced efficacy of aspirin
288	Electronic	CLOPIDOGREL HYDROGEN SULFATE -- DIPYRONE	Not Specified	Major	Fair	Concurrent use of ANTIPLATELET AGENTS and NSAIDS may result in increased risk of bleeding
288	Electronic	CLOPIDOGREL HYDROGEN SULFATE -- ENOXAPARIN SODIUM	Not Specified	Major	Fair	Concurrent use of ANTIPLATELETS and LOW MOLECULAR WEIGHT HEPARIN may result in increased risk of bleeding
288	Electronic	DIPYRONE -- ENOXAPARIN SODIUM	Not Specified	Major	Good	Concurrent use of LOW-MOLECULAR-WEIGHT HEPARINS and NSAIDS may result in an increased risk of bleeding
288	Electronic	INSULIN HUMAN REGULAR -- METOCLOPRAMIDE HYDROCHLORIDE	Not Specified	Major	Fair	Concurrent use of METOCLOPRAMIDE and INSULINS may result in risk of hyperglycemia
288	Electronic	ASPIRIN -- INSULIN HUMAN REGULAR	Not Specified	Moderate	Fair	Concurrent use of INSULIN OR PRAMLINTIDE and SALICYLATES may result in increased risk of hypoglycemia.
288	Electronic	CLOPIDOGREL HYDROGEN SULFATE -- SIMVASTATIN	Not Specified	Moderate	Excellent	Concurrent use of CLOPIDOGREL and CYP3A4 METABOLIZED STATINS may result in decreased formation of clopidogrel active metabolite resulting in high on-treatment platelet reactivity.
289	Electronic	BROMOPRIDE -- TRAMADOL HYDROCHLORIDE	Not Specified	Major	Fair	Concurrent use of BROMOPRIDE and OPIOID ANALGESICS may result in potentiation of sedative effects
289	Electronic	DIPYRONE -- ENOXAPARIN SODIUM	Not Specified	Major	Good	Concurrent use of LOW-MOLECULAR-WEIGHT HEPARINS and NSAIDS may result in an increased risk of bleeding
289	Electronic	ONDANSETRON -- TRAMADOL HYDROCHLORIDE	Not Specified	Major	Fair	Concurrent use of TRAMADOL and SEROTONERGIC AGENTS may result in increased risk of serotonin syndrome
289	Electronic	CARVEDILOL -- DIPYRONE	Delayed	Moderate	Good	Concurrent use of BETA-ADRENERGIC BLOCKERS and NSAIDS may result in increased blood pressure
289	Electronic	CARVEDILOL -- INSULIN HUMAN REGULAR	Delayed	Moderate	Good	Concurrent use of ANTIDIABETIC AGENTS and BETA-ADRENERGIC BLOCKERS may result in hypoglycemia or hyperglycemia; decreased symptoms of hypoglycemia
289	Electronic	DIPYRONE -- LOSARTAN POTASSIUM	Not Specified	Moderate	Excellent	Concurrent use of ACE INHIBITORS AND ANGIOTENSIN RECEPTOR BLOCKERS and NSAIDS may result in renal dysfunction and/or increased blood pressure
289	Electronic	INSULIN HUMAN REGULAR -- LOSARTAN POTASSIUM	Not Specified	Moderate	Fair	Concurrent use of ANGIOTENSIN RECEPTOR BLOCKERS and INSULIN may result in increased risk of hypoglycemia
290	Electronic	ATENOLOL -- INSULIN HUMAN REGULAR	Delayed	Moderate	Good	Concurrent use of ANTIDIABETIC AGENTS and BETA-ADRENERGIC BLOCKERS may result in hypoglycemia or hyperglycemia; decreased symptoms of hypoglycemia
291	Electronic	ASPIRIN -- DIPYRONE	Not Specified	Major	Excellent	Concurrent use of ASPIRIN and DIPYRONE may result in reduced efficacy of aspirin
291	Electronic	ASPIRIN -- HEPARIN SODIUM	Not Specified	Major	Fair	Concurrent use of ANTICOAGULANTS and ANTIPLATELET AGENTS may result in increased risk of bleeding
291	Electronic	ASPIRIN -- HYDROCHLOROTHIAZIDE	Delayed	Major	Good	Concurrent use of NSAIDS and THIAZIDE DIURETICS may result in reduced diuretic effectiveness and possible nephrotoxicity
291	Electronic	DIPYRONE -- HEPARIN SODIUM	Not Specified	Major	Fair	Concurrent use of ANTICOAGULANTS and NSAIDS may result in increased risk of bleeding
291	Electronic	DIPYRONE -- HYDROCHLOROTHIAZIDE	Delayed	Major	Good	Concurrent use of NSAIDS and THIAZIDE DIURETICS may result in reduced diuretic effectiveness and possible nephrotoxicity
291	Electronic	ASPIRIN -- ATENOLOL	Delayed	Moderate	Good	Concurrent use of BETA-ADRENERGIC BLOCKERS and NSAIDS may result in increased blood pressure
291	Electronic	ASPIRIN -- INSULIN HUMAN ISOPHANE (NPH)	Not Specified	Moderate	Fair	Concurrent use of INSULIN OR PRAMLINTIDE and SALICYLATES may result in increased risk of hypoglycemia
291	Electronic	ASPIRIN -- INSULIN HUMAN REGULAR	Not Specified	Moderate	Fair	Concurrent use of INSULIN OR PRAMLINTIDE and SALICYLATES may result in increased risk of hypoglycemia
291	Electronic	ATENOLOL -- DIPYRONE	Delayed	Moderate	Good	Concurrent use of BETA-ADRENERGIC BLOCKERS and NSAIDS may result in increased blood pressure
291	Electronic	ATENOLOL -- INSULIN HUMAN ISOPHANE (NPH)	Delayed	Moderate	Good	Concurrent use of ANTIDIABETIC AGENTS and BETA-ADRENERGIC BLOCKERS may result in hypoglycemia or hyperglycemia; decreased symptoms of hypoglycemia
291	Electronic	ATENOLOL -- INSULIN HUMAN REGULAR	Delayed	Moderate	Good	Concurrent use of ANTIDIABETIC AGENTS and BETA-ADRENERGIC BLOCKERS may result in hypoglycemia or hyperglycemia; decreased symptoms of hypoglycemia
291	Electronic	HYDROCHLOROTHIAZIDE -- INSULIN HUMAN ISOPHANE (NPH)	Not Specified	Moderate	Fair	Concurrent use of ANTIDIABETIC AGENTS and SELECTED DIURETICS may result in increased hyperglycemia risk; increased insulin requirement
291	Electronic	HYDROCHLOROTHIAZIDE -- INSULIN HUMAN REGULAR	Not Specified	Moderate	Fair	Concurrent use of ANTIDIABETIC AGENTS and SELECTED DIURETICS may result in increased hyperglycemia risk; increased insulin requirement.
291	Electronic	PHENYTOIN -- SIMVASTATIN	Delayed	Moderate	Good	Concurrent use of PHENYTOIN and SIMVASTATIN may result in loss of simvastatin efficacy
291	Electronic	ASPIRIN -- PHENYTOIN	Delayed	Minor	Fair	Concurrent use of ASPIRIN and PHENYTOIN may result in decreased phenytoin concentrations
291	Electronic	ASPIRIN -- RANITIDINE HYDROCHLORIDE	Not Specified	Minor	Excellent	Concurrent use of ASPIRIN and RANITIDINE may result in reduced salicylate plasma levels and decreased antiplatelet effect of aspirin
291	Electronic	PHENYTOIN -- RANITIDINE HYDROCHLORIDE	Delayed	Minor	Good	Concurrent use of PHENYTOIN and RANITIDINE may result in increased phenytoin concentrations
292	Electronic	METOCLOPRAMIDE HYDROCHLORIDE -- RISPERIDONE	Not Specified	Contraindicated	Fair	Concurrent use of METOCLOPRAMIDE and ANTIPSYCHOTICS may result in an increased risk of extrapyramidal reactions and neuroleptic malignant syndrome
292	Electronic	AMLODIPINE BESYLATE -- SIMVASTATIN	Rapid	Major	Good	Concurrent use of AMLODIPINE and SIMVASTATIN may result in increased simvastatin exposure and increased risk of myopathy, including rhabdomyolysis
292	Electronic	ASPIRIN -- DIPYRONE	Not Specified	Major	Excellent	Concurrent use of ASPIRIN and DIPYRONE may result in reduced efficacy of aspirin
292	Electronic	ASPIRIN -- HEPARIN SODIUM	Not Specified	Major	Fair	Concurrent use of ANTICOAGULANTS and ANTIPLATELET AGENTS may result in increased risk of bleeding
292	Electronic	DIPYRONE -- HEPARIN SODIUM	Not Specified	Major	Fair	Concurrent use of ANTICOAGULANTS and NSAIDS may result in increased risk of bleeding.
292	Electronic	RISPERIDONE -- SIMVASTATIN	Delayed	Major	Good	Concurrent use of RISPERIDONE and SIMVASTATIN may result in increased simvastatin serum concentrations with an increased risk of myopathy or rhabdomyolysis
292	Electronic	ACYCLOVIR -- PHENYTOIN	Delayed	Moderate	Good	Concurrent use of ACYCLOVIR and PHENYTOIN may result in decreased phenytoin plasma concentrations and potential increased seizure activity
292	Electronic	ASPIRIN -- ENALAPRIL MALEATE	Rapid	Moderate	Excellent	Concurrent use of ASPIRIN and ENALAPRIL may result in decreased effectiveness of enalapril.
292	Electronic	DIPYRONE -- ENALAPRIL MALEATE	Not Specified	Moderate	Excellent	Concurrent use of ACE INHIBITORS AND ANGIOTENSIN RECEPTOR BLOCKERS and NSAIDS may result in renal dysfunction and/or increased blood pressure
292	Electronic	OMEPRAZOLE -- PHENYTOIN	Delayed	Moderate	Fair	Concurrent use of OMEPRAZOLE and PHENYTOIN may result in an increased risk of phenytoin toxicity (ataxia, hyperreflexia, nystagmus, tremor).
292	Electronic	PHENYTOIN -- RISPERIDONE	Delayed	Moderate	Good	Concurrent use of RISPERIDONE and STRONG CYP3A4 INDUCERS may result in decreased plasma concentrations of risperiDONE and the active metabolite 9-hydroxyrisperidone
292	Electronic	PHENYTOIN -- SIMVASTATIN	Delayed	Moderate	Good	Concurrent use of PHENYTOIN and SIMVASTATIN may result in loss of simvastatin efficacy
292	Electronic	ASPIRIN -- PHENYTOIN	Delayed	Minor	Fair	Concurrent use of ASPIRIN and PHENYTOIN may result in decreased phenytoin concentrations
293	Electronic	ASPIRIN -- DIPYRONE	Not Specified	Major	Excellent	Concurrent use of ASPIRIN and DIPYRONE may result in reduced efficacy of aspirin.
293	Electronic	CARBAMAZEPINE -- PHENYTOIN	Delayed	Major	Excellent	Concurrent use of CARBAMAZEPINE and PHENYTOIN may result in decreased phenytoin and/or carbamazepine concentrations
293	Electronic	CARBAMAZEPINE -- SIMVASTATIN	Delayed	Major	Good	Concurrent use of CARBAMAZEPINE and SIMVASTATIN may result in reduced simvastatin exposure
293	Electronic	DIPYRONE -- ENOXAPARIN SODIUM	Not Specified	Major	Good	Concurrent use of LOW-MOLECULAR-WEIGHT HEPARINS and NSAIDS may result in an increased risk of bleeding.
293	Electronic	INSULIN HUMAN REGULAR -- METOCLOPRAMIDE HYDROCHLORIDE	Not Specified	Major	Fair	Concurrent use of METOCLOPRAMIDE and INSULINS may result in risk of hyperglycemia
293	Electronic	ASPIRIN -- INSULIN HUMAN REGULAR	Not Specified	Moderate	Fair	Concurrent use of INSULIN OR PRAMLINTIDE and SALICYLATES may result in increased risk of hypoglycemia
293	Electronic	CARBAMAZEPINE -- RANITIDINE HYDROCHLORIDE	Not Specified	Moderate	Fair	Concurrent use of CARBAMAZEPINE and CYP3A4 INHIBITORS may result in increased carbamazepine exposure
293	Electronic	PHENYTOIN -- SIMVASTATIN	Delayed	Moderate	Good	Concurrent use of PHENYTOIN and SIMVASTATIN may result in loss of simvastatin efficacy
293	Electronic	ASPIRIN -- PHENYTOIN	Delayed	Minor	Fair	Concurrent use of ASPIRIN and PHENYTOIN may result in decreased phenytoin concentrations
293	Electronic	ASPIRIN -- RANITIDINE HYDROCHLORIDE	Not Specified	Minor	Excellent	Concurrent use of ASPIRIN and RANITIDINE may result in reduced salicylate plasma levels and decreased antiplatelet effect of aspirin
293	Electronic	PHENYTOIN -- RANITIDINE HYDROCHLORIDE	Delayed	Minor	Good	Concurrent use of PHENYTOIN and RANITIDINE may result in increased phenytoin concentrations.
294	Electronic	AMLODIPINE BESYLATE -- SIMVASTATIN	Rapid	Major	Good	Concurrent use of AMLODIPINE and SIMVASTATIN may result in increased simvastatin exposure and increased risk of myopathy, including rhabdomyolysis
294	Electronic	ASPIRIN -- DIPYRONE	Not Specified	Major	Excellent	Concurrent use of ASPIRIN and DIPYRONE may result in reduced efficacy of aspirin
294	Electronic	DIPYRONE -- ENOXAPARIN SODIUM	Not Specified	Major	Good	Concurrent use of LOW-MOLECULAR-WEIGHT HEPARINS and NSAIDS may result in an increased risk of bleeding
294	Electronic	INSULIN HUMAN REGULAR -- METOCLOPRAMIDE HYDROCHLORIDE	Not Specified	Major	Fair	Concurrent use of METOCLOPRAMIDE and INSULINS may result in risk of hyperglycemia
294	Electronic	ASPIRIN -- INSULIN HUMAN REGULAR	Not Specified	Major	Fair	Concurrent use of INSULIN OR PRAMLINTIDE and SALICYLATES may result in increased risk of hypoglycemia
294	Electronic	DIPYRONE -- LOSARTAN POTASSIUM	Not Specified	Moderate	Excellent	Concurrent use of ACE INHIBITORS AND ANGIOTENSIN RECEPTOR BLOCKERS and NSAIDS may result in renal dysfunction and/or increased blood pressure
294	Electronic	INSULIN HUMAN REGULAR -- LOSARTAN POTASSIUM	Not Specified	Moderate	Fair	Concurrent use of ANGIOTENSIN RECEPTOR BLOCKERS and INSULIN may result in increased risk of hypoglycemia.
295	Electronic	AMLODIPINE BESYLATE -- DOMPERIDONE	Not Specified	Major	Fair	Concurrent use of AMLODIPINE and DOMPERIDONE may result in increased domperidone exposure and an increased risk of QT prolongation
295	Electronic	CIPROFLOXACIN -- DOMPERIDONE	Not Specified	Major	Fair	Concurrent use of CIPROFLOXACIN and DOMPERIDONE may result in increased domperidone exposure and an increased risk of QT prolongation
295	Electronic	CIPROFLOXACIN -- INSULIN HUMAN REGULAR	Not Specified	Major	Fair	Concurrent use of FLUOROQUINOLONES and ANTIDIABETIC AGENTS may result in changes in blood glucose and increased risk of hypoglycemia or hyperglycemia
295	Electronic	DIPYRONE -- HEPARIN SODIUM	Not Specified	Major	Fair	Concurrent use of ANTICOAGULANTS and NSAIDS may result in increased risk of bleeding
295	Electronic	DOMPERIDONE -- RANITIDINE HYDROCHLORIDE	Not Specified	Major	Fair	Concurrent use of DOMPERIDONE and RANITIDINE may result in increased domperidone exposure and an increased risk of QT prolongation
295	Electronic	INSULIN HUMAN REGULAR -- METOCLOPRAMIDE HYDROCHLORIDE	Not Specified	Major	Fair	Concurrent use of METOCLOPRAMIDE and INSULINS may result in risk of hyperglycemia
295	Electronic	METOCLOPRAMIDE HYDROCHLORIDE -- MORPHINE SULFATE	Not Specified	Major	Fair	Concurrent use of METOCLOPRAMIDE and CNS DEPRESSANTS may result in increased risk of CNS depression
295	Electronic	CIPROFLOXACIN -- PHENYTOIN	Not Specified	Moderate	Good	Concurrent use of CIPROFLOXACIN and PHENYTOIN may result in increased or decreased serum phenytoin levels.
295	Electronic	DIPYRONE -- LOSARTAN POTASSIUM	Not Specified	Moderate	Excellent	Concurrent use of ACE INHIBITORS AND ANGIOTENSIN RECEPTOR BLOCKERS and NSAIDS may result in renal dysfunction and/or increased blood pressure
295	Electronic	INSULIN HUMAN REGULAR -- LOSARTAN POTASSIUM	Not Specified	Moderate	Fair	Concurrent use of ANGIOTENSIN RECEPTOR BLOCKERS and INSULIN may result in increased risk of hypoglycemia
295	Electronic	PHENYTOIN -- RANITIDINE HYDROCHLORIDE	Delayed	Minor	Good	Concurrent use of PHENYTOIN and RANITIDINE may result in increased phenytoin concentrations
296	Electronic	METOCLOPRAMIDE HYDROCHLORIDE -- SERTRALINE HYDROCHLORIDE	Not Specified	Contraindicated	Fair	Concurrent use of METOCLOPRAMIDE and SSRIs may result in an increased risk of extrapyramidal reactions and neuroleptic malignant syndrome
296	Electronic	DEXAMETHASONE -- DIPYRONE	Not Specified	Major	Fair	Concurrent use of CORTICOSTEROIDS and NSAIDS may result in increased risk of gastrointestinal ulcer or bleeding
296	Electronic	DEXAMETHASONE -- TRAMADOL HYDROCHLORIDE	Not Specified	Major	Fair	Concurrent use of TRAMADOL and CYP3A4 INDUCERS may result in reduced tramadol exposure
296	Electronic	DIPYRONE -- ENOXAPARIN SODIUM	Not Specified	Major	Good	Concurrent use of LOW-MOLECULAR-WEIGHT HEPARINS and NSAIDS may result in an increased risk of bleeding
296	Electronic	DIPYRONE -- FUROSEMIDE	Not Specified	Major	Good	Concurrent use of LOOP DIURETICS and NSAIDS may result in reduced diuretic effectiveness and possible nephrotoxicity
296	Electronic	DIPYRONE -- SERTRALINE HYDROCHLORIDE	Not Specified	Major	Excellent	Concurrent use of NSAID and SSRI may result in an increased risk of bleeding
296	Electronic	DOMPERIDONE -- SERTRALINE HYDROCHLORIDE	Not Specified	Major	Fair	Concurrent use of SERTRALINE and QT INTERVAL PROLONGING DRUGS may result in increased risk of QT-interval prolongation
296	Electronic	DOMPERIDONE -- RANITIDINE HYDROCHLORIDE	Not Specified	Major	Fair	Concurrent use of DOMPERIDONE and RANITIDINE may result in increased domperidone exposure and an increased risk of QT prolongation.
296	Electronic	ENOXAPARIN SODIUM -- SERTRALINE HYDROCHLORIDE	Delayed	Major	Good	Concurrent use of SERTRALINE and ANTICOAGULANTS may result in an increased risk of bleeding.
296	Electronic	METOCLOPRAMIDE HYDROCHLORIDE -- TRAMADOL HYDROCHLORIDE	Not Specified	Major	Fair	Concurrent use of METOCLOPRAMIDE and CNS DEPRESSANTS may result in increased risk of CNS depression
296	Electronic	RANITIDINE HYDROCHLORIDE -- TRAMADOL HYDROCHLORIDE	Not Specified	Major	Fair	Concurrent use of TRAMADOL and CYP3A4 INHIBITORS may result in increased tramadol exposure and increased risk of respiratory depression
296	Electronic	SERTRALINE HYDROCHLORIDE -- TRAMADOL HYDROCHLORIDE	Not Specified	Major	Fair	Concurrent use of TRAMADOL and SEROTONERGIC CYP2D6 INHIBITORS may result in increased tramadol exposure and reduced concentrations of the active metabolite
297	Electronic	DIPYRONE -- HEPARIN SODIUM	Not Specified	Major	Fair	Concurrent use of ANTICOAGULANTS and NSAIDS may result in increased risk of bleeding.
298	Electronic	AMLODIPINE BESYLATE -- SIMVASTATIN	Rapid	Major	Good	Concurrent use of AMLODIPINE and SIMVASTATIN may result in increased simvastatin exposure and increased risk of myopathy, including rhabdomyolysis
298	Electronic	DIPYRONE -- ENALAPRIL MALEATE	Not Specified	Moderate	Excellent	Concurrent use of ACE INHIBITORS AND ANGIOTENSIN RECEPTOR BLOCKERS and NSAIDS may result in renal dysfunction and/or increased blood pressure.
298	Electronic	ENALAPRIL MALEATE -- INSULIN HUMAN REGULAR	Not Specified	Moderate	Fair	Concurrent use of ACE INHIBITORS and ANTIDIABETIC AGENTS may result in increased risk of hypoglycemia
298	Electronic	LEVOTHYROXINE SODIUM -- SIMVASTATIN	Delayed	Moderate	Good	Concurrent use of LEVOTHYROXINE and SIMVASTATIN may result in decreased levothyroxine efficacy
299	Electronic	HALOPERIDOL -- METOCLOPRAMIDE HYDROCHLORIDE	Not Specified	Contraindicated	Fair	Concurrent use of METOCLOPRAMIDE and ANTIPSYCHOTICS may result in an increased risk of extrapyramidal reactions and neuroleptic malignant syndrome
299	Electronic	DIPYRONE -- ENOXAPARIN SODIUM	Not Specified	Major	Good	Concurrent use of LOW-MOLECULAR-WEIGHT HEPARINS and NSAIDS may result in an increased risk of bleeding
299	Electronic	INSULIN HUMAN REGULAR -- METOCLOPRAMIDE HYDROCHLORIDE	Not Specified	Major	Fair	Concurrent use of METOCLOPRAMIDE and INSULINS may result in risk of hyperglycemia
299	Electronic	OMEPRAZOLE -- PHENYTOIN	Delayed	Moderate	Fair	Concurrent use of OMEPRAZOLE and PHENYTOIN may result in an increased risk of phenytoin toxicity (ataxia, hyperreflexia, nystagmus, tremor)
300	Electronic	ASPIRIN -- DIPYRONE	Not Specified	Major	Excellent	Concurrent use of ASPIRIN and DIPYRONE may result in reduced efficacy of aspirin
300	Electronic	DIPYRONE -- HYDROCORTISONE	Not Specified	Major	Fair	Concurrent use of CORTICOSTEROIDS and NSAIDS may result in increased risk of gastrointestinal ulcer or bleeding
300	Electronic	INSULIN HUMAN REGULAR -- METOCLOPRAMIDE HYDROCHLORIDE	Not Specified	Major	Fair	Concurrent use of METOCLOPRAMIDE and INSULINS may result in risk of hyperglycemia
300	Electronic	ASPIRIN -- INSULIN HUMAN REGULAR	Not Specified	Moderate	Fair	Concurrent use of INSULIN OR PRAMLINTIDE and SALICYLATES may result in increased risk of hypoglycemia
300	Electronic	ASPIRIN -- HYDROCORTISONE	Delayed	Minor	Good	Concurrent use of ASPIRIN and HYDROCORTISONE may result in an increased risk of gastrointestinal ulceration and subtherapeutic aspirin serum concentrations
301	Electronic	METOCLOPRAMIDE HYDROCHLORIDE -- NORTRIPTYLINE HYDROCHLORIDE	Not Specified	Contraindicated	Fair	Concurrent use of METOCLOPRAMIDE and TRICYCLIC ANTIDEPRESSANTS may result in an increased risk of extrapyramidal reactions and neuroleptic malignant syndrome.
301	Electronic	BENSERAZIDE/ LEVODOPA -- METOCLOPRAMIDE HYDROCHLORIDE	Not Specified	Major	Fair	Concurrent use of METOCLOPRAMIDE and DOPAMINERGIC AGENTS may result in diminished effectiveness of metoclopramide and the dopaminergic agent
301	Electronic	BIPERIDEN HYDROCHLORIDE -- METOCLOPRAMIDE HYDROCHLORIDE	Not Specified	Major	Fair	Concurrent use of METOCLOPRAMIDE and DOPAMINERGIC AGENTS may result in diminished effectiveness of metoclopramide and the dopaminergic agent.
301	Electronic	CLONAZEPAM -- METOCLOPRAMIDE HYDROCHLORIDE	Not Specified	Major	Fair	Concurrent use of METOCLOPRAMIDE and CNS DEPRESSANTS may result in increased risk of CNS depression
301	Electronic	DIPYRONE -- NORTRIPTYLINE HYDROCHLORIDE	Not Specified	Major	Excellent	Concurrent use of NSAID and TRICYCLIC ANTIDEPRESSANTS may result in an increased risk of bleeding
301	Electronic	LEVOTHYROXINE SODIUM -- NORTRIPTYLINE HYDROCHLORIDE	Not Specified	Major	Fair	Concurrent use of LEVOTHYROXINE and TRICYCLIC ANTIDEPRESSANTS may result in increased therapeutic and toxic effects of both levothyroxine and tricyclic antidepressant
301	Electronic	LEVOTHYROXINE SODIUM -- SIMVASTATIN	Delayed	Moderate	Good	Concurrent use of LEVOTHYROXINE and SIMVASTATIN may result in decreased levothyroxine efficacy
303	Electronic	DIPYRONE -- ENOXAPARIN SODIUM	Not Specified	Major	Good	Concurrent use of LOW-MOLECULAR-WEIGHT HEPARINS and NSAIDS may result in an increased risk of bleeding
303	Electronic	MORPHINE SULFATE -- ONDANSETRON	Not Specified	Major	Fair	Concurrent use of MORPHINE and SEROTONERGIC AGENTS may result in increased risk of serotonin syndrome
303	Electronic	ATENOLOL -- DESLANOSIDE	Not Specified	Moderate	Good	Concurrent use of BETA-ADRENERGIC BLOCKERS and DIGITALIS GLYCOSIDES may result in increased risk of bradycardia and possible digitalis glycoside toxicity
303	Electronic	ATENOLOL -- DIPYRONE	Delayed	Moderate	Good	Concurrent use of BETA-ADRENERGIC BLOCKERS and NSAIDS may result in increased blood pressure
304	Electronic	ASPIRIN -- CLOPIDOGREL HYDROGEN SULFATE	Not Specified	Major	Fair	Concurrent use of ASPIRIN and CLOPIDOGREL may result in an increased risk of bleeding
304	Electronic	ASPIRIN -- DIPYRONE	Not Specified	Major	Excellent	Concurrent use of ASPIRIN and DIPYRONE may result in reduced efficacy of aspirin
304	Electronic	ASPIRIN -- FUROSEMIDE	Not Specified	Major	Good	Concurrent use of LOOP DIURETICS and NSAIDS may result in reduced diuretic effectiveness and possible nephrotoxicity
304	Electronic	ASPIRIN -- SPIRONOLACTONE	Not Specified	Major	Good	Concurrent use of NSAIDS and POTASSIUM-SPARING DIURETICS may result in reduced diuretic effectiveness, hyperkalemia, or possible nephrotoxicity
304	Electronic	CLOPIDOGREL HYDROGEN SULFATE -- DIPYRONE	Not Specified	Major	Fair	Concurrent use of ANTIPLATELET AGENTS and NSAIDS may result in increased risk of bleeding
304	Electronic	CLOPIDOGREL HYDROGEN SULFATE -- ENOXAPARIN SODIUM	Not Specified	Major	Fair	Concurrent use of ANTIPLATELETS and LOW MOLECULAR WEIGHT HEPARIN may result in increased risk of bleeding
304	Electronic	DIPYRONE -- ENOXAPARIN SODIUM	Not Specified	Major	Good	Concurrent use of LOW-MOLECULAR-WEIGHT HEPARINS and NSAIDS may result in an increased risk of bleeding
304	Electronic	DIPYRONE -- FUROSEMIDE	Not Specified	Major	Good	Concurrent use of LOOP DIURETICS and NSAIDS may result in reduced diuretic effectiveness and possible nephrotoxicity
304	Electronic	DIPYRONE -- SPIRONOLACTONE	Not Specified	Major	Good	Concurrent use of NSAIDS and POTASSIUM-SPARING DIURETICS may result in reduced diuretic effectiveness, hyperkalemia, or possible nephrotoxicity
304	Electronic	ENALAPRIL MALEATE -- SPIRONOLACTONE	Delayed	Major	Good	Concurrent use of POTASSIUM-SPARING DIURETICS and ANGIOTENSIN CONVERTING ENZYME INHIBITORS may result in hyperkalemia
304	Electronic	INSULIN HUMAN ISOPHANE (NPH) -- METOCLOPRAMIDE HYDROCHLORIDE	Not Specified	Major	Fair	Concurrent use of METOCLOPRAMIDE and INSULINS may result in risk of hyperglycemia
304	Electronic	INSULIN HUMAN REGULAR -- METOCLOPRAMIDE HYDROCHLORIDE	Not Specified	Major	Fair	Concurrent use of METOCLOPRAMIDE and INSULINS may result in risk of hyperglycemia
304	Electronic	ASPIRIN -- CARVEDILOL	Delayed	Moderate	Good	Concurrent use of BETA-ADRENERGIC BLOCKERS and NSAIDS may result in increased blood pressure
304	Electronic	ASPIRIN -- ENALAPRIL MALEATE	Rapid	Moderate	Excellent	Concurrent use of ASPIRIN and ENALAPRIL may result in decreased effectiveness of enalapril
304	Electronic	ASPIRIN -- INSULIN HUMAN ISOPHANE (NPH)	Not Specified	Moderate	Fair	Concurrent use of INSULIN OR PRAMLINTIDE and SALICYLATES may result in increased risk of hypoglycemia
304	Electronic	ASPIRIN -- INSULIN HUMAN REGULAR	Not Specified	Moderate	Fair	Concurrent use of INSULIN OR PRAMLINTIDE and SALICYLATES may result in increased risk of hypoglycemia
304	Electronic	CARVEDILOL -- DIPYRONE	Delayed	Moderate	Good	Concurrent use of BETA-ADRENERGIC BLOCKERS and NSAIDS may result in increased blood pressure.
304	Electronic	CARVEDILOL -- INSULIN HUMAN ISOPHANE (NPH)	Delayed	Moderate	Good	Concurrent use of ANTIDIABETIC AGENTS and BETA-ADRENERGIC BLOCKERS may result in hypoglycemia or hyperglycemia; decreased symptoms of hypoglycemia.
304	Electronic	CARVEDILOL -- INSULIN HUMAN REGULAR	Delayed	Moderate	Good	Concurrent use of ANTIDIABETIC AGENTS and BETA-ADRENERGIC BLOCKERS may result in hypoglycemia or hyperglycemia; decreased symptoms of hypoglycemia
304	Electronic	DIPYRONE -- ENALAPRIL MALEATE	Not Specified	Moderate	Excellent	Concurrent use of ACE INHIBITORS AND ANGIOTENSIN RECEPTOR BLOCKERS and NSAIDS may result in renal dysfunction and/or increased blood pressure.
304	Electronic	ENALAPRIL MALEATE -- FUROSEMIDE	Rapid	Moderate	Good	Concurrent use of ANGIOTENSIN CONVERTING ENZYME INHIBITORS and LOOP DIURETICS may result in postural hypotension (first dose).
304	Electronic	ENALAPRIL MALEATE -- INSULIN HUMAN ISOPHANE (NPH)	Not Specified	Moderate	Fair	Concurrent use of ACE INHIBITORS and ANTIDIABETIC AGENTS may result in increased risk of hypoglycemia
304	Electronic	ENALAPRIL MALEATE -- INSULIN HUMAN REGULAR	Not Specified	Moderate	Fair	Concurrent use of ACE INHIBITORS and ANTIDIABETIC AGENTS may result in increased risk of hypoglycemia
304	Electronic	FUROSEMIDE -- INSULIN HUMAN ISOPHANE (NPH)	Not Specified	Moderate	Fair	Concurrent use of ANTIDIABETIC AGENTS and SELECTED DIURETICS may result in increased hyperglycemia risk; increased insulin requirement
304	Electronic	FUROSEMIDE -- INSULIN HUMAN REGULAR	Not Specified	Moderate	Fair	Concurrent use of ANTIDIABETIC AGENTS and SELECTED DIURETICS may result in increased hyperglycemia risk; increased insulin requirement
304	Electronic	ASPIRIN -- RANITIDINE HYDROCHLORIDE	Not Specified	Minor	Excellent	Concurrent use of ASPIRIN and RANITIDINE may result in reduced salicylate plasma levels and decreased antiplatelet effect of aspirin
308	Electronic	INSULIN HUMAN REGULAR -- METOCLOPRAMIDE HYDROCHLORIDE	Not Specified	Major	Fair	Concurrent use of METOCLOPRAMIDE and INSULINS may result in risk of hyperglycemia
308	Electronic	DIPYRONE -- LOSARTAN POTASSIUM	Not Specified	Moderate	Excellent	Concurrent use of ACE INHIBITORS AND ANGIOTENSIN RECEPTOR BLOCKERS and NSAIDS may result in renal dysfunction and/or increased blood pressure
308	Electronic	INSULIN HUMAN REGULAR -- LOSARTAN POTASSIUM	Not Specified	Moderate	Fair	Concurrent use of ANGIOTENSIN RECEPTOR BLOCKERS and INSULIN may result in increased risk of hypoglycemia
414	Manual	DIPYRONE -- FUROSEMIDE	Not Specified	Major	Good	Concurrent use of LOOP DIURETICS and NSAIDS may result in reduced diuretic effectiveness and possible nephrotoxicity
414	Manual	CARVEDILOL -- DIPYRONE	Delayed	Moderate	Good	Concurrent use of BETA-ADRENERGIC BLOCKERS and NSAIDS may result in increased blood pressure
414	Manual	DIPYRONE -- LEVOFLOXACIN	Delayed	Moderate	Fair	Concurrent use of LEVOFLOXACIN and NONSTEROIDAL ANTIINFLAMMATORY AGENTS may result in an increased risk of seizures.
414	Manual	FUROSEMIDE -- PHENYTOIN	Delayed	Minor	Fair	Concurrent use of FUROSEMIDE and PHENYTOIN may result in decreased furosemide efficacy
414	Manual	PHENOBARBITAL -- PHENYTOIN	Delayed	Minor	Good	Concurrent use of PHENOBARBITAL and PHENYTOIN may result in increased or decreased phenytoin levels
415	Manual	DIPYRONE -- LOSARTAN POTASSIUM	Not Specified	Moderate	Excellent	Concurrent use of ACE INHIBITORS AND ANGIOTENSIN RECEPTOR BLOCKERS and NSAIDS may result in renal dysfunction and/or increased blood pressure.
416	Manual	None
417	Manual	BROMOPRIDE -- QUETIAPINE FUMARATE	Not Specified	Contraindicated	Fair	Concurrent use of BROMOPRIDE and DRUGS THAT CAUSE EXTRAPYRAMIDAL REACTIONS may result in increased risk of extrapyramidal reactions
417	Manual	DIPYRONE -- RIVAROXABAN	Not Specified	Major	Fair	Concurrent use of ANTICOAGULANTS and NSAIDS may result in increased risk of bleeding.
417	Manual	LEVOFLOXACIN -- QUETIAPINE FUMARATE	Not Specified	Major	Fair	Concurrent use of QUETIAPINE and QT INTERVAL PROLONGING AGENTS may result in increased risk of QT-interval prolongation
417	Manual	DIPYRONE -- LEVOFLOXACIN	Delayed	Moderate	Fair	Concurrent use of LEVOFLOXACIN and NONSTEROIDAL ANTIINFLAMMATORY AGENTS may result in an increased risk of seizures
421	Manual	None				Concurrent use of THEOPHYLLINE and LEVOFLOXACIN may result in theophylline toxicity (nausea, vomiting, palpitations, seizures).
423	Manual	AMINOPHYLLINE -- LEVOFLOXACIN	Delayed	Major	Fair
423	Manual	DIPYRONE -- FUROSEMIDE	Not Specified	Major	Good	Concurrent use of LOOP DIURETICS and NSAIDS may result in reduced diuretic effectiveness and possible nephrotoxicity
423	Manual	DIPYRONE -- HYDROCORTISONE	Not Specified	Major	Fair	Concurrent use of CORTICOSTEROIDS and NSAIDS may result in increased risk of gastrointestinal ulcer or bleeding.
423	Manual	HYDROCORTISONE -- LEVOFLOXACIN	Delayed	Major	Excellent	Concurrent use of SELECTED CORTICOSTEROIDS and SELECTED FLUOROQUINOLONES may result in an increased risk of tendon rupture
423	Manual	DIPYRONE -- LEVOFLOXACIN	Delayed	Moderate	Fair	Concurrent use of LEVOFLOXACIN and NONSTEROIDAL ANTIINFLAMMATORY AGENTS may result in an increased risk of seizures
423	Manual	FUROSEMIDE -- HYDROCORTISONE	Delayed	Moderate	Fair	Concurrent use of FUROSEMIDE and HYDROCORTISONE may result in hypokalemia
423	Manual	AMINOPHYLLINE -- FUROSEMIDE	Rapid	Minor	Fair	Concurrent use of FUROSEMIDE and THEOPHYLLINE may result in altered theophylline concentrations
424	Manual	BROMOPRIDE -- CLONAZEPAM	Not Specified	Major	Fair	Concurrent use of BROMOPRIDE and SEDATIVES may result in potentiation of sedative effects
425	Manual	DIPYRONE -- HEPARIN SODIUM	Not Specified	Major	Fair	Concurrent use of ANTICOAGULANTS and NSAIDS may result in increased risk of bleeding
425	Manual	ACETAMINOPHEN -- PHENYTOIN	Delayed	Moderate	Good	Concurrent use of ACETAMINOPHEN and PHENYTOIN may result in decreased acetaminophen effectiveness and an increased risk of hepatotoxicity
425	Manual	PHENYTOIN -- RANITIDINE HYDROCHLORIDE	Delayed	Minor	Good	Concurrent use of PHENYTOIN and RANITIDINE may result in increased phenytoin concentrations
426	Manual	None
427	Manual	ASPIRIN -- DIPYRONE	Not Specified	Major	Excellent	Concurrent use of ASPIRIN and DIPYRONE may result in reduced efficacy of aspirin
427	Manual	ASPIRIN -- HEPARIN SODIUM	Not Specified	Major	Fair	Concurrent use of ANTICOAGULANTS and ANTIPLATELET AGENTS may result in increased risk of bleeding
427	Manual	DIPYRONE -- HEPARIN SODIUM	Not Specified	Major	Fair	Concurrent use of ANTICOAGULANTS and NSAIDS may result in increased risk of bleeding
427	Manual	ASPIRIN -- LEVOFLOXACIN	Delayed	Moderate	Fair	Concurrent use of LEVOFLOXACIN and NONSTEROIDAL ANTIINFLAMMATORY AGENTS may result in an increased risk of seizures
427	Manual	DIPYRONE -- LEVOFLOXACIN	Delayed	Moderate	Fair	Concurrent use of LEVOFLOXACIN and NONSTEROIDAL ANTIINFLAMMATORY AGENTS may result in an increased risk of seizures
427	Manual	ASPIRIN -- RANITIDINE HYDROCHLORIDE	Not Specified	Minor	Excellent	Concurrent use of ASPIRIN and RANITIDINE may result in reduced salicylate plasma levels and decreased antiplatelet effect of aspirin
428	Manual	DIPYRONE -- HYDROCORTISONE	Not Specified	Major	Fair	Concurrent use of CORTICOSTEROIDS and NSAIDS may result in increased risk of gastrointestinal ulcer or bleeding
429	Manual	ASPIRIN -- DIPYRONE	Not Specified	Major	Excellent	Concurrent use of ASPIRIN and DIPYRONE may result in reduced efficacy of aspirin
429	Manual	ASPIRIN -- FUROSEMIDE	Not Specified	Major	Good	Concurrent use of LOOP DIURETICS and NSAIDS may result in reduced diuretic effectiveness and possible nephrotoxicity
429	Manual	DEXAMETHASONE -- DIPYRONE	Not Specified	Major	Fair	Concurrent use of CORTICOSTEROIDS and NSAIDS may result in increased risk of gastrointestinal ulcer or bleeding
429	Manual	DIPYRONE -- FUROSEMIDE	Not Specified	Major	Good	Concurrent use of LOOP DIURETICS and NSAIDS may result in reduced diuretic effectiveness and possible nephrotoxicity
429	Manual	ASPIRIN -- DEXAMETHASONE	Delayed	Moderate	Good	Concurrent use of ASPIRIN and DEXAMETHASONE may result in an increased risk of gastrointestinal ulceration and subtherapeutic aspirin serum concentrations.
429	Manual	DEXAMETHASONE -- PHENYTOIN	Delayed	Moderate	Excellent	Concurrent use of DEXAMETHASONE and PHENYTOIN may result in decreased dexamethasone effectiveness
429	Manual	ASPIRIN -- PHENYTOIN	Delayed	Minor	Fair	Concurrent use of ASPIRIN and PHENYTOIN may result in decreased phenytoin concentrations.
429	Manual	FUROSEMIDE -- PHENYTOIN	Delayed	Minor	Fair	Concurrent use of FUROSEMIDE and PHENYTOIN may result in decreased furosemide efficacy
430	Manual	DOMPERIDONE -- RANITIDINE HYDROCHLORIDE	Not Specified	Major	Fair	Concurrent use of DOMPERIDONE and RANITIDINE may result in increased domperidone exposure and an increased risk of QT prolongation
430	Manual	RANITIDINE HYDROCHLORIDE -- TRAMADOL HYDROCHLORIDE	Not Specified	Major	Fair	Concurrent use of TRAMADOL and CYP3A4 INHIBITORS may result in increased tramadol exposure and increased risk of respiratory depression
432	Manual	DIPYRONE -- LEVOFLOXACIN	Delayed	Moderate	Fair	Concurrent use of LEVOFLOXACIN and NONSTEROIDAL ANTIINFLAMMATORY AGENTS may result in an increased risk of seizures.
487	Electronic	DIPYRONE -- KETOPROFEN	Not Specified	Major	Fair	Concurrent use of NSAIDS and NSAIDS AND SALICYLATES may result in increased risk of bleeding
487	Electronic	METOCLOPRAMIDE HYDROCHLORIDE -- MORPHINE SULFATE	Not Specified	Major	Fair	Concurrent use of METOCLOPRAMIDE and CNS DEPRESSANTS may result in increased risk of CNS depression.
487	Electronic	METOCLOPRAMIDE HYDROCHLORIDE -- TRAMADOL HYDROCHLORIDE	Not Specified	Major	Fair	Concurrent use of METOCLOPRAMIDE and CNS DEPRESSANTS may result in increased risk of CNS depression
487	Electronic	MORPHINE SULFATE -- ONDANSETRON	Not Specified	Major	Fair	Concurrent use of MORPHINE and SEROTONERGIC AGENTS may result in increased risk of serotonin syndrome
487	Electronic	MORPHINE SULFATE -- TRAMADOL HYDROCHLORIDE	Not Specified	Major	Fair	Concurrent use of MORPHINE and SEROTONERGIC CNS DEPRESSANTS may result in increased risk of respiratory and CNS depression; increased risk of serotonin syndrome.
487	Electronic	ONDANSETRON -- TRAMADOL HYDROCHLORIDE	Not Specified	Major	Fair	Concurrent use of TRAMADOL and SEROTONERGIC AGENTS may result in increased risk of serotonin syndrome
488	Electronic	DIPYRONE -- FUROSEMIDE	Not Specified	Major	Good	Concurrent use of LOOP DIURETICS and NSAIDS may result in reduced diuretic effectiveness and possible nephrotoxicity
488	Electronic	INSULIN HUMAN REGULAR -- METOCLOPRAMIDE HYDROCHLORIDE	Not Specified	Major	Fair	Concurrent use of METOCLOPRAMIDE and INSULINS may result in risk of hyperglycemia.
488	Electronic	METOCLOPRAMIDE HYDROCHLORIDE -- ZOLPIDEM TARTRATE	Not Specified	Major	Fair	Concurrent use of METOCLOPRAMIDE and CNS DEPRESSANTS may result in increased risk of CNS depression.
488	Electronic	CLONIDINE -- INSULIN HUMAN REGULAR	Not Specified	Moderate	Fair	Concurrent use of CLONIDINE and INSULIN may result in hypoglycemia or hyperglycemia.
488	Electronic	DIPYRONE -- ENALAPRIL MALEATE	Not Specified	Moderate	Excellent	Concurrent use of ACE INHIBITORS AND ANGIOTENSIN RECEPTOR BLOCKERS and NSAIDS may result in renal dysfunction and/or increased blood pressure
488	Electronic	ENALAPRIL MALEATE -- FUROSEMIDE	Rapid	Moderate	Good	Concurrent use of ANGIOTENSIN CONVERTING ENZYME INHIBITORS and LOOP DIURETICS may result in postural hypotension (first dose)
488	Electronic	ENALAPRIL MALEATE -- INSULIN HUMAN REGULAR	Not Specified	Moderate	Fair	Concurrent use of ACE INHIBITORS and ANTIDIABETIC AGENTS may result in increased risk of hypoglycemia
488	Electronic	FUROSEMIDE -- INSULIN HUMAN REGULAR	Not Specified	Moderate	Fair	Concurrent use of ANTIDIABETIC AGENTS and SELECTED DIURETICS may result in increased hyperglycemia risk; increased insulin requirement
489	Electronic	DIPYRONE -- KETOPROFEN	Not Specified	Major	Fair	Concurrent use of NSAIDS and NSAIDS AND SALICYLATES may result in increased risk of bleeding.
489	Electronic	INSULIN HUMAN REGULAR -- METOCLOPRAMIDE HYDROCHLORIDE	Not Specified	Major	Fair	Concurrent use of METOCLOPRAMIDE and INSULINS may result in risk of hyperglycemia
489	Electronic	PHENYTOIN -- ZIDOVUDINE	Delayed	Minor	Good	Concurrent use of PHENYTOIN and ZIDOVUDINE may result in increased zidovudine concentrations
490	Electronic	ASPIRIN -- CLOPIDOGREL HYDROGEN SULFATE	Not Specified	Major	Fair	Concurrent use of ASPIRIN and CLOPIDOGREL may result in an increased risk of bleeding
490	Electronic	ASPIRIN -- DIPYRONE	Not Specified	Major	Excellent	Concurrent use of ASPIRIN and DIPYRONE may result in reduced efficacy of aspirin.
490	Electronic	CLOPIDOGREL HYDROGEN SULFATE -- DIPYRONE	Not Specified	Major	Fair	Concurrent use of ANTIPLATELET AGENTS and NSAIDS may result in increased risk of bleeding
490	Electronic	INSULIN HUMAN REGULAR -- METOCLOPRAMIDE HYDROCHLORIDE	Not Specified	Major	Fair	Concurrent use of METOCLOPRAMIDE and INSULINS may result in risk of hyperglycemia.
490	Electronic	ASPIRIN -- INSULIN HUMAN REGULAR	Not Specified	Moderate	Fair	Concurrent use of INSULIN OR PRAMLINTIDE and SALICYLATES may result in increased risk of hypoglycemia
491	Electronic	CLOPIDOGREL HYDROGEN SULFATE -- DIPYRONE	Not Specified	Major	Fair	Concurrent use of ANTIPLATELET AGENTS and NSAIDS may result in increased risk of bleeding.
491	Electronic	CLOPIDOGREL HYDROGEN SULFATE -- ENOXAPARIN SODIUM	Not Specified	Major	Fair	Concurrent use of ANTIPLATELETS and LOW MOLECULAR WEIGHT HEPARIN may result in increased risk of bleeding.
491	Electronic	DIPYRONE -- ENOXAPARIN SODIUM	Not Specified	Major	Good	Concurrent use of LOW-MOLECULAR-WEIGHT HEPARINS and NSAIDS may result in an increased risk of bleeding.
491	Electronic	INSULIN HUMAN REGULAR -- METOCLOPRAMIDE HYDROCHLORIDE	Not Specified	Major	Fair	Concurrent use of METOCLOPRAMIDE and INSULINS may result in risk of hyperglycemia
491	Electronic	CLOPIDOGREL HYDROGEN SULFATE -- PHENYTOIN	Delayed	Moderate	Good	Concurrent use of CLOPIDOGREL and PHENYTOIN may result in an increased risk of phenytoin toxicity (ataxia, hyperreflexia, nystagmus, tremor)
[truncated: 222 more rows]
[truncated: 1 more columns]

## Sheet: Discharge
Patient	Type Prescription	High-alert Med	Med 1	Med 2	Med 3	Med 4	Med 5	Med 6	Med 7	Med 8	Med 9	Med 10	Med 11	Med 12	Med 13	Med 14	Med 15	Med 16	Med 17	Med 18	Med 19	Med 20	Med 21	Med 22	Med 23	Med 24	Med 25	N° Med Prescribed
[truncated: 328 more rows]

[truncated: 4 more sheets: Media_Med_Disc, p-DDI_Discharge, Med_Presc_Adm&Disch, Med_Presc_&_pDDI]
